# Supplementary material
Source: publisher figshare collection journal article supplement (https://acs.figshare.com/ndownloader/files/10189836)
Supplement: Supplementary file 1 [file 10189836]

## Sheet: 4K Shift
13.307	12.675	12.018	13.452	12.818	14.27	11.998	10.048	12.751	10.66	9.134	12.203	15.636	14.134	17.35	14.043	12.074	13.731	10.31	13.331	16.278	15.119	12.618	15.91	13.228	11.095	13.049	16.002	15.914	13.551	11.945
13.965	13.327	12.662	14.095	13.453	14.896	12.62	10.664	13.363	11.268	9.736	12.801	16.229	14.72	17.932	14.622	12.648	14.295	10.879	13.896	16.839	15.673	13.168	16.455	13.77	11.632	13.583	16.531	16.435	14.069	12.435
14.623	13.978	13.307	14.737	14.089	15.521	13.241	11.281	13.975	11.875	10.338	13.398	16.821	15.307	18.514	15.201	13.222	14.859	11.449	14.461	17.399	16.227	13.718	17	14.311	12.169	14.117	17.061	16.957	14.587	12.924
15.281	14.629	13.951	15.379	14.724	16.146	13.862	11.897	14.587	12.483	10.94	13.996	17.413	15.894	19.096	15.78	13.797	15.423	12.018	15.025	17.959	16.781	14.268	17.545	14.853	12.706	14.651	17.59	17.479	15.104	13.413
15.939	15.28	14.595	16.021	15.359	16.772	14.483	12.513	15.2	13.09	11.543	14.593	18.005	16.48	19.677	16.359	14.371	15.987	12.587	15.59	18.519	17.335	14.818	18.09	15.394	13.243	15.185	18.119	18.001	15.622	13.902
16.597	15.931	15.24	16.663	15.994	17.397	15.104	13.13	15.812	13.698	12.145	15.19	18.597	17.067	20.259	16.938	14.945	16.551	13.156	16.154	19.079	17.889	15.369	18.635	15.935	13.78	15.718	18.649	18.522	16.14	14.391
17.254	16.582	15.884	17.305	16.63	18.022	15.725	13.746	16.424	14.305	12.747	15.788	19.189	17.653	20.84	17.517	15.52	17.115	13.726	16.719	19.638	18.443	15.919	19.18	16.477	14.317	16.252	19.178	19.044	16.657	14.88
17.912	17.233	16.528	17.947	17.265	18.647	16.346	14.362	17.036	14.913	13.349	16.385	19.781	18.24	21.422	18.096	16.094	17.678	14.295	17.283	20.198	18.997	16.469	19.725	17.018	14.854	16.786	19.707	19.566	17.175	15.369
18.57	17.884	17.172	18.589	17.9	19.272	16.966	14.978	17.647	15.52	13.951	16.982	20.373	18.826	22.003	18.675	16.668	18.242	14.864	17.848	20.758	19.551	17.019	20.27	17.559	15.391	17.32	20.236	20.087	17.692	15.858
19.227	18.535	17.816	19.231	18.535	19.897	17.587	15.594	18.259	16.128	14.553	17.579	20.964	19.413	22.585	19.254	17.242	18.806	15.433	18.412	21.318	20.105	17.569	20.815	18.101	15.928	17.854	20.766	20.609	18.21	16.347
19.885	19.186	18.461	19.873	19.17	20.522	18.208	16.21	18.871	16.735	15.155	18.176	21.556	19.999	23.166	19.832	17.816	19.37	16.002	18.976	21.878	20.658	18.118	21.36	18.642	16.464	18.388	21.295	21.131	18.727	16.836
20.543	19.836	19.105	20.514	19.805	21.147	18.829	16.826	19.483	17.342	15.757	18.774	22.148	20.585	23.747	20.411	18.39	19.933	16.571	19.541	22.437	21.212	18.668	21.904	19.183	17.001	18.921	21.824	21.652	19.245	17.325
21.2	20.487	19.749	21.156	20.44	21.772	19.449	17.442	20.095	17.949	16.358	19.371	22.74	21.172	24.329	20.99	18.964	20.497	17.14	20.105	22.997	21.766	19.218	22.449	19.724	17.538	19.455	22.353	22.174	19.762	17.814
21.858	21.138	20.392	21.798	21.075	22.397	20.07	18.058	20.706	18.557	16.96	19.968	23.331	21.758	24.91	21.568	19.538	21.061	17.709	20.669	23.557	22.32	19.768	22.994	20.265	18.075	19.989	22.882	22.695	20.28	18.303
22.515	21.789	21.036	22.44	21.71	23.022	20.691	18.674	21.318	19.164	17.562	20.565	23.923	22.344	25.491	22.147	20.112	21.624	18.278	21.233	24.116	22.873	20.318	23.538	20.806	18.611	20.522	23.411	23.216	20.797	18.792
23.173	22.439	21.68	23.081	22.345	23.647	21.311	19.29	21.93	19.771	18.164	21.162	24.515	22.93	26.072	22.726	20.686	22.188	18.846	21.797	24.676	23.427	20.868	24.083	21.347	19.148	21.056	23.94	23.738	21.314	19.281
23.83	23.09	22.324	23.723	22.98	24.272	21.932	19.906	22.541	20.378	18.765	21.758	25.106	23.516	26.653	23.304	21.259	22.751	19.415	22.362	25.235	23.98	21.417	24.628	21.888	19.684	21.589	24.469	24.259	21.831	19.77
26.459	23.74	22.968	24.364	23.614	24.896	22.552	20.521	23.153	20.985	19.367	22.355	25.698	24.103	27.235	23.883	21.833	23.315	19.984	22.926	25.795	24.534	21.967	25.172	22.429	20.221	22.123	24.998	24.78	22.349	20.258
26.459	24.391	23.611	25.006	24.249	25.521	23.173	21.137	23.764	21.592	19.969	22.952	26.289	24.689	27.816	24.461	22.407	23.878	20.553	23.49	26.354	25.087	22.517	25.717	22.97	20.757	22.656	25.527	25.302	22.866	20.747
27.116	25.041	24.255	25.647	24.884	26.146	23.793	21.753	24.376	22.199	20.57	23.549	26.881	25.275	28.397	25.039	22.981	24.441	21.121	24.054	26.914	25.641	23.066	26.261	23.511	21.294	23.19	26.056	25.823	23.383	21.236
26.459	25.691	24.899	26.289	25.518	26.77	24.413	22.368	24.987	22.806	21.172	24.146	27.472	25.861	28.978	25.618	23.554	25.005	21.69	24.618	27.473	26.194	23.616	26.806	24.052	21.83	23.723	26.585	26.344	23.9	21.724
27.116	26.342	25.542	26.93	26.153	27.395	25.034	22.984	25.599	23.413	21.773	24.742	28.063	26.447	29.559	26.196	24.128	25.568	22.259	25.181	28.033	26.748	24.165	27.35	24.593	22.367	24.256	27.113	26.865	24.417	22.213
27.773	26.992	26.186	27.571	26.787	28.019	25.654	23.599	26.21	24.019	22.374	25.339	28.655	27.032	30.14	26.774	24.701	26.131	22.827	25.745	28.592	27.301	24.715	27.895	25.134	22.903	24.79	27.642	27.387	24.934	22.702
28.43	27.642	26.829	28.213	27.422	28.644	26.274	24.215	26.821	24.626	22.976	25.936	29.246	27.618	30.72	27.353	25.275	26.695	23.396	26.309	29.151	27.854	25.264	28.439	25.674	23.439	25.323	28.171	27.908	25.451	23.19
29.087	28.293	27.473	28.854	28.056	29.268	26.894	24.83	27.432	25.233	23.577	26.532	29.837	28.204	31.301	27.931	25.849	27.258	23.964	26.873	29.71	28.408	25.814	28.983	26.215	23.976	25.856	28.699	28.429	25.968	23.679
29.744	28.943	28.116	29.495	28.691	29.892	27.515	25.446	28.044	25.84	24.178	27.129	30.429	28.79	31.882	28.509	26.422	27.821	24.533	27.437	30.27	28.961	26.363	29.527	26.756	24.512	26.39	29.228	28.95	26.485	24.167
30.401	29.593	28.76	30.136	29.325	30.517	28.135	26.061	28.655	26.446	24.78	27.725	31.02	29.376	32.463	29.087	26.995	28.384	25.101	28.001	30.829	29.514	26.912	30.072	27.296	25.048	26.923	29.757	29.471	27.002	24.656
31.058	30.243	29.403	30.777	29.959	31.141	28.755	26.676	29.266	27.053	25.381	28.322	31.611	29.961	33.044	29.665	27.569	28.947	25.669	28.564	31.388	30.067	27.462	30.616	27.837	25.584	27.456	30.285	29.992	27.519	25.144
31.714	30.893	30.046	31.418	30.594	31.765	29.375	27.292	29.877	27.659	25.982	28.918	32.202	30.547	33.624	30.243	28.142	29.51	26.238	29.128	31.947	30.621	28.011	31.16	28.378	26.12	27.989	30.814	30.513	28.036	25.633
32.371	31.543	30.689	32.059	31.228	32.389	29.995	27.907	30.488	28.266	26.583	29.514	32.793	31.133	34.205	30.821	28.716	30.073	26.806	29.692	32.506	31.174	28.56	31.704	28.918	26.657	28.522	31.342	31.034	28.553	26.121
33.028	32.193	31.332	32.7	31.862	33.014	30.615	28.522	31.099	28.872	27.184	30.111	33.384	31.718	34.785	31.399	29.289	30.636	27.374	30.255	33.065	31.727	29.109	32.248	29.459	27.193	29.055	31.871	31.555	29.07	26.609
33.685	32.843	31.976	33.341	32.496	33.638	31.234	29.137	31.71	29.479	27.785	30.707	33.975	32.304	35.366	31.977	29.862	31.199	27.943	30.819	33.624	32.28	29.659	32.792	29.999	27.729	29.588	32.399	32.075	29.586	27.098
34.341	33.492	32.619	33.982	33.13	34.262	31.854	29.752	32.321	30.085	28.386	31.303	34.566	32.889	35.947	32.555	30.435	31.762	28.511	31.382	34.183	32.833	30.208	33.336	30.54	28.265	30.121	32.928	32.596	30.103	27.586
34.998	34.142	33.262	34.623	33.764	34.886	32.474	30.367	32.932	30.692	28.987	31.899	35.157	33.475	36.527	33.133	31.008	32.325	29.079	31.946	34.742	33.386	30.757	33.88	31.08	28.801	30.654	33.456	33.117	30.62	28.074
35.654	34.792	33.905	35.263	34.398	35.51	33.094	30.982	33.543	31.298	29.588	32.496	35.748	34.06	37.107	33.711	31.582	32.888	29.647	32.509	35.301	33.939	31.306	34.424	31.62	29.337	31.187	33.984	33.638	31.136	28.562
36.311	35.442	34.548	35.904	35.032	36.134	33.713	31.597	34.153	31.904	30.189	33.092	36.338	34.646	37.688	34.289	32.155	33.45	30.215	33.072	35.86	34.491	31.855	34.968	32.161	29.872	31.72	34.513	34.158	31.653	29.051
36.967	36.091	35.191	36.545	35.666	36.758	34.333	32.212	34.764	32.51	30.79	33.688	36.929	35.231	38.268	34.866	32.728	34.013	30.783	33.636	36.418	35.044	32.404	35.512	32.701	30.408	32.253	35.041	34.679	32.17	29.539
37.623	36.741	35.833	37.185	36.3	37.381	34.953	32.827	35.375	33.117	31.391	34.284	37.52	35.816	38.848	35.444	33.301	34.576	31.351	34.199	36.977	35.597	32.953	36.056	33.241	30.944	32.785	35.569	35.2	32.686	30.027
38.28	37.39	36.476	37.826	36.934	38.005	35.572	33.442	35.985	33.723	31.992	34.88	38.111	36.401	39.429	36.022	33.874	35.138	31.919	34.762	37.536	36.15	33.502	36.6	33.781	31.48	33.318	36.097	35.72	33.203	30.515
38.936	38.04	37.119	38.466	37.567	38.629	36.192	34.057	36.596	34.329	32.592	35.476	38.701	36.987	40.009	36.599	34.447	35.701	32.487	35.326	38.094	36.703	34.05	37.144	34.322	32.016	33.851	36.626	36.241	33.719	31.003
39.592	38.689	37.762	39.107	38.201	39.253	36.811	34.671	37.206	34.935	33.193	36.072	39.292	37.572	40.589	37.177	35.019	36.264	33.055	35.889	38.653	37.255	34.599	37.687	34.862	32.551	34.384	37.154	36.761	34.236	31.491
40.248	39.339	38.404	39.747	38.835	39.876	37.431	35.286	37.817	35.541	33.794	36.668	39.882	38.157	41.169	37.754	35.592	36.826	33.623	36.452	39.212	37.808	35.148	38.231	35.402	33.087	34.916	37.682	37.282	34.752	31.979
40.905	39.988	39.047	40.388	39.468	40.5	38.05	35.901	38.427	36.147	34.394	37.263	40.473	38.742	41.749	38.332	36.165	37.389	34.19	37.015	39.77	38.361	35.697	38.775	35.942	33.623	35.449	38.21	37.802	35.268	32.467
41.561	40.637	39.689	41.028	40.102	41.123	38.669	36.515	39.038	36.753	34.995	37.859	41.063	39.327	42.33	38.909	36.738	37.951	34.758	37.578	40.329	38.913	36.246	39.318	36.482	34.158	35.981	38.738	38.323	35.785	32.955
42.217	41.286	40.332	41.668	40.735	41.747	39.289	37.13	39.648	37.359	35.595	38.455	41.654	39.912	42.91	39.487	37.31	38.513	35.326	38.141	40.887	39.466	36.794	39.862	37.022	34.694	36.514	39.266	38.843	36.301	33.443
42.873	41.936	40.974	42.309	41.369	42.37	39.908	37.745	40.259	37.964	36.196	39.051	42.244	40.497	43.49	40.064	37.883	39.076	35.894	38.704	41.446	40.018	37.343	40.405	37.562	35.229	37.047	39.794	39.363	36.817	33.931
43.528	42.585	41.617	42.949	42.002	42.994	40.527	38.359	40.869	38.57	36.796	39.646	42.834	41.082	44.069	40.641	38.456	39.638	36.461	39.267	42.004	40.571	37.891	40.949	38.102	35.765	37.579	40.322	39.884	37.334	34.419
44.184	43.234	42.259	43.589	42.636	43.617	41.146	38.973	41.479	39.176	37.396	40.242	43.425	41.667	44.649	41.219	39.028	40.2	37.029	39.83	42.562	41.123	38.44	41.492	38.642	36.3	38.111	40.85	40.404	37.85	34.906
44.84	43.883	42.902	44.229	43.269	44.241	41.765	39.588	42.089	39.782	37.997	40.837	44.015	42.252	45.229	41.796	39.601	40.763	37.596	40.393	43.121	41.675	38.988	42.036	39.182	36.836	38.644	41.377	40.924	38.366	35.394
45.496	44.532	43.544	44.869	43.902	44.864	42.384	40.202	42.7	40.387	38.597	41.433	44.605	42.837	45.809	42.373	40.173	41.325	38.164	40.956	43.679	42.228	39.537	42.579	39.721	37.371	39.176	41.905	41.445	38.882	35.882
46.152	45.181	44.186	45.509	44.535	45.487	43.003	40.816	43.31	40.993	39.197	42.028	45.195	43.421	46.389	42.95	40.746	41.887	38.731	41.519	44.237	42.78	40.085	43.123	40.261	37.906	39.709	42.433	41.965	39.398	36.37
46.807	45.83	44.828	46.149	45.169	46.11	43.622	41.431	43.92	41.598	39.797	42.624	45.785	44.006	46.969	43.527	41.318	42.449	39.299	42.081	44.795	43.332	40.634	43.666	40.801	38.442	40.241	42.961	42.485	39.914	36.857
47.463	46.479	45.47	46.789	45.802	46.733	44.241	42.045	44.53	42.204	40.398	43.219	46.376	44.591	47.548	44.104	41.891	43.011	39.866	42.644	45.354	43.885	41.182	44.209	41.341	38.977	40.773	43.488	43.005	40.43	37.345
48.119	47.127	46.112	47.429	46.435	47.357	44.86	42.659	45.14	42.809	40.998	43.815	46.966	45.175	48.128	44.682	42.463	43.573	40.433	43.207	45.912	44.437	41.73	44.752	41.88	39.512	41.305	44.016	43.525	40.946	37.833
48.774	47.776	46.754	48.069	47.068	47.98	45.479	43.273	45.75	43.415	41.598	44.41	47.556	45.76	48.708	45.259	43.035	44.135	41.001	43.769	46.47	44.989	42.279	45.296	42.42	40.047	41.837	44.544	44.045	41.462	38.32
49.43	48.425	47.396	48.708	47.701	48.603	46.098	43.887	46.36	44.02	42.198	45.005	48.146	46.344	49.287	45.835	43.608	44.697	41.568	44.332	47.028	45.541	42.827	45.839	42.96	40.583	42.37	45.071	44.565	41.978	38.808
50.085	49.074	48.038	49.348	48.334	49.226	46.717	44.501	46.969	44.626	42.798	45.6	48.735	46.929	49.867	46.412	44.18	45.259	42.135	44.894	47.586	46.093	43.375	46.382	43.499	41.118	42.902	45.599	45.085	42.494	39.295
50.74	49.722	48.68	49.988	48.967	49.849	47.335	45.115	47.579	45.231	43.398	46.196	49.325	47.513	50.446	46.989	44.752	45.821	42.702	45.457	48.144	46.645	43.923	46.925	44.039	41.653	43.434	46.126	45.605	43.01	39.783
51.396	50.371	49.322	50.627	49.6	50.471	47.954	45.729	48.189	45.836	43.997	46.791	49.915	48.098	51.026	47.566	45.324	46.383	43.27	46.019	48.702	47.197	44.472	47.468	44.578	42.188	43.966	46.654	46.125	43.526	40.27
52.051	51.019	49.964	51.267	50.233	51.094	48.573	46.343	48.799	46.441	44.597	47.386	50.505	48.682	51.605	48.143	45.896	46.945	43.837	46.582	49.26	47.749	45.02	48.011	45.117	42.723	44.498	47.181	46.645	44.042	40.757
52.706	51.668	50.606	51.906	50.865	51.717	49.191	46.957	49.408	47.047	45.197	47.981	51.095	49.267	52.184	48.72	46.468	47.507	44.404	47.144	49.818	48.301	45.568	48.554	45.657	43.258	45.03	47.709	47.164	44.557	41.245
53.361	52.316	51.247	52.546	51.498	52.34	49.81	47.571	50.018	47.652	45.797	48.576	51.684	49.851	52.764	49.296	47.04	48.068	44.971	47.707	50.375	48.853	46.116	49.097	46.196	43.793	45.562	48.236	47.684	45.073	41.732
54.017	52.965	51.889	53.185	52.131	52.962	50.428	48.184	50.627	48.257	46.397	49.171	52.274	50.435	53.343	49.873	47.612	48.63	45.538	48.269	50.933	49.405	46.664	49.64	46.736	44.328	46.093	48.763	48.204	45.589	42.22
54.672	53.613	52.531	53.825	52.763	53.585	51.047	48.798	51.237	48.862	46.996	49.766	52.864	51.019	53.922	50.45	48.184	49.192	46.105	48.831	51.491	49.956	47.212	50.183	47.275	44.862	46.625	49.29	48.724	46.104	42.707
55.327	54.261	53.172	54.464	53.396	54.208	51.665	49.412	51.846	49.467	47.596	50.361	53.453	51.603	54.501	51.026	48.756	49.753	46.672	49.393	52.048	50.508	47.76	50.725	47.814	45.397	47.157	49.818	49.243	46.62	43.194
55.982	54.909	53.814	55.103	54.028	54.83	52.283	50.025	52.456	50.072	48.195	50.956	54.043	52.188	55.081	51.603	49.328	50.315	47.238	49.956	52.606	51.06	48.307	51.268	48.353	45.932	47.689	50.345	49.763	47.135	43.681
56.637	55.558	54.455	55.743	54.661	55.453	52.902	50.639	53.065	50.677	48.795	51.55	54.632	52.772	55.66	52.179	49.9	50.877	47.805	50.518	53.164	51.612	48.855	51.811	48.892	46.467	48.221	50.872	50.283	47.651	44.168
57.291	56.206	55.096	56.382	55.293	56.075	53.52	51.253	53.675	51.281	49.394	52.145	55.222	53.356	56.239	52.756	50.472	51.438	48.372	51.08	53.721	52.163	49.403	52.354	49.432	47.001	48.752	51.399	50.802	48.166	44.656
57.946	56.854	55.738	57.021	55.926	56.698	54.138	51.866	54.284	51.886	49.994	52.74	55.811	53.94	56.818	53.332	51.043	52	48.939	51.642	54.279	52.715	49.951	52.896	49.971	47.536	49.284	51.926	51.322	48.682	45.143
58.601	57.502	56.379	57.66	56.558	57.32	54.756	52.479	54.893	52.491	50.593	53.334	56.4	54.524	57.397	53.908	51.615	52.561	49.505	52.204	54.836	53.266	50.498	53.439	50.51	48.071	49.816	52.453	51.841	49.197	45.63
59.256	58.15	57.02	58.299	57.19	57.942	55.374	53.093	55.502	53.096	51.193	53.929	56.99	55.108	57.976	54.485	52.187	53.122	50.072	52.766	55.394	53.818	51.046	53.982	51.049	48.605	50.347	52.98	52.361	49.713	46.117
59.91	58.798	57.662	58.938	57.823	58.565	55.992	53.706	56.112	53.7	51.792	54.524	57.579	55.691	58.555	55.061	52.758	53.684	50.639	53.328	55.951	54.369	51.594	54.524	51.588	49.14	50.879	53.507	52.88	50.228	46.604
60.565	59.445	58.303	59.577	58.455	59.187	56.61	54.319	56.721	54.305	52.391	55.118	58.168	56.275	59.133	55.637	53.33	54.245	51.205	53.89	56.508	54.921	52.141	55.067	52.127	49.674	51.41	54.034	53.399	50.743	47.091
61.22	60.093	58.944	60.216	59.087	59.809	57.228	54.933	57.33	54.91	52.99	55.713	58.757	56.859	59.712	56.213	53.901	54.806	51.772	54.452	57.066	55.472	52.689	55.609	52.665	50.209	51.942	54.561	53.919	51.259	47.578
61.874	60.741	59.585	60.855	59.719	60.431	57.846	55.546	57.939	55.514	53.59	56.307	59.346	57.443	60.291	56.79	54.473	55.367	52.338	55.014	57.623	56.024	53.236	56.151	53.204	50.743	52.473	55.088	54.438	51.774	48.065
62.529	61.389	60.226	61.493	60.351	61.053	58.464	56.159	58.548	56.119	54.189	56.901	59.936	58.026	60.87	57.366	55.044	55.929	52.905	55.575	58.18	56.575	53.784	56.694	53.743	51.278	53.004	55.615	54.957	52.289	48.551
63.183	62.036	60.867	62.132	60.983	61.675	59.082	56.772	59.157	56.723	54.788	57.496	60.525	58.61	61.448	57.942	55.616	56.49	53.471	56.137	58.738	57.126	54.331	57.236	54.282	51.812	53.536	56.142	55.476	52.804	49.038
63.837	62.684	61.508	62.771	61.615	62.297	59.7	57.385	59.766	57.327	55.387	58.09	61.114	59.194	62.027	58.518	56.187	57.051	54.038	56.699	59.295	57.677	54.879	57.779	54.821	52.346	54.067	56.668	55.996	53.319	49.525
64.492	63.332	62.149	63.41	62.247	62.919	60.317	57.998	60.374	57.932	55.986	58.684	61.703	59.777	62.606	59.094	56.758	57.612	54.604	57.26	59.852	58.229	55.426	58.321	55.359	52.881	54.598	57.195	56.515	53.834	50.012
65.146	63.979	62.789	64.048	62.879	63.541	60.935	58.611	60.983	58.536	56.585	59.278	62.291	60.361	63.184	59.67	57.33	58.173	55.17	57.822	60.409	58.78	55.973	58.863	55.898	53.415	55.13	57.722	57.034	54.349	50.499
65.8	64.627	63.43	64.687	63.51	64.163	61.553	59.224	61.592	59.14	57.184	59.873	62.88	60.944	63.763	60.246	57.901	58.734	55.736	58.384	60.966	59.331	56.52	59.405	56.437	53.949	55.661	58.248	57.553	54.864	50.985
66.454	65.274	64.071	65.325	64.142	64.785	62.17	59.837	62.201	59.744	57.782	60.467	63.469	61.528	64.341	60.821	58.472	59.295	56.303	58.945	61.523	59.882	57.068	59.947	56.975	54.483	56.192	58.775	58.072	55.379	51.472
67.108	65.921	64.711	65.964	64.774	65.406	62.788	60.45	62.809	60.349	58.381	61.061	64.058	62.111	64.92	61.397	59.043	59.855	56.869	59.507	62.08	60.433	57.615	60.489	57.514	55.017	56.723	59.302	58.591	55.894	51.959
67.762	66.569	65.352	66.602	65.406	66.028	63.405	61.063	63.418	60.953	58.98	61.655	64.647	62.694	65.498	61.973	59.614	60.416	57.435	60.068	62.637	60.984	58.162	61.031	58.052	55.551	57.254	59.828	59.11	56.409	52.445
68.416	67.216	65.993	67.24	66.037	66.65	64.023	61.675	64.026	61.557	59.579	62.249	65.235	63.278	66.076	62.549	60.185	60.977	58.001	60.629	63.194	61.535	58.709	61.574	58.591	56.085	57.785	60.355	59.629	56.924	52.932
69.07	67.863	66.633	67.879	66.669	67.271	64.64	62.288	64.635	62.161	60.177	62.843	65.824	63.861	66.655	63.124	60.756	61.538	58.567	61.191	63.75	62.086	59.256	62.115	59.129	56.619	58.316	60.881	60.148	57.439	53.418
69.724	68.51	67.274	68.517	67.3	67.893	65.257	62.901	65.243	62.765	60.776	63.437	66.413	64.444	67.233	63.7	61.327	62.099	59.133	61.752	64.307	62.637	59.803	62.657	59.667	57.153	58.847	61.407	60.667	57.954	53.905
70.378	69.157	67.914	69.155	67.932	68.514	65.875	63.513	65.852	63.369	61.375	64.03	67.001	65.027	67.811	64.276	61.898	62.659	59.699	62.313	64.864	63.187	60.35	63.199	60.206	57.687	59.378	61.934	61.185	58.468	54.391
71.032	69.804	68.554	69.793	68.563	69.136	66.492	64.126	66.46	63.973	61.973	64.624	67.59	65.61	68.389	64.851	62.469	63.22	60.265	62.875	65.421	63.738	60.897	63.741	60.744	58.221	59.909	62.46	61.704	58.983	54.878
71.686	70.451	69.195	70.431	69.194	69.757	67.109	64.738	67.068	64.576	62.572	65.218	68.178	66.193	68.967	65.427	63.04	63.78	60.83	63.436	65.977	64.289	61.444	64.283	61.282	58.755	60.44	62.986	62.223	59.498	55.364
72.339	71.098	69.835	71.069	69.826	70.378	67.726	65.351	67.677	65.18	63.17	65.812	68.766	66.776	69.545	66.002	63.611	64.341	61.396	63.997	66.534	64.84	61.991	64.825	61.82	59.289	60.97	63.513	62.742	60.012	55.85
72.993	71.745	70.475	71.707	70.457	71	68.343	65.963	68.285	65.784	63.768	66.405	69.355	67.359	70.123	66.578	64.181	64.901	61.962	64.558	67.09	65.39	62.538	65.367	62.359	59.823	61.501	64.039	63.26	60.527	56.337
73.647	72.392	71.115	72.345	71.088	71.621	68.96	66.575	68.893	66.388	64.367	66.999	69.943	67.942	70.701	67.153	64.752	65.462	62.528	65.119	67.647	65.941	63.084	65.908	62.897	60.356	62.032	64.565	63.779	61.042	56.823
74.3	73.039	71.755	72.983	71.719	72.242	69.577	67.188	69.501	66.991	64.965	67.592	70.531	68.525	71.279	67.728	65.323	66.022	63.093	65.68	68.203	66.492	63.631	66.45	63.435	60.89	62.563	65.091	64.297	61.556	57.309
74.954	73.686	72.395	73.621	72.35	72.863	70.194	67.8	70.109	67.595	65.563	68.186	71.12	69.108	71.857	68.304	65.893	66.583	63.659	66.241	68.76	67.042	64.178	66.992	63.973	61.424	63.093	65.617	64.816	62.071	57.795
75.607	74.332	73.035	74.259	72.981	73.484	70.811	68.412	70.717	68.198	66.161	68.779	71.708	69.691	72.435	68.879	66.464	67.143	64.225	66.802	69.316	67.593	64.724	67.533	64.511	61.957	63.624	66.143	65.334	62.585	58.281
76.26	74.979	73.675	74.896	73.612	74.105	71.428	69.024	71.325	68.802	66.76	69.373	72.296	70.274	73.013	69.454	67.035	67.703	64.79	67.363	69.873	68.143	65.271	68.075	65.049	62.491	64.154	66.669	65.853	63.099	58.768
76.914	75.626	74.315	75.534	74.243	74.726	72.045	69.636	71.933	69.405	67.358	69.966	72.884	70.856	73.59	70.029	67.605	68.263	65.356	67.924	70.429	68.693	65.818	68.616	65.587	63.024	64.685	67.195	66.371	63.614	59.254
77.567	76.272	74.955	76.172	74.874	75.347	72.662	70.248	72.541	70.009	67.956	70.56	73.472	71.439	74.168	70.604	68.175	68.824	65.921	68.485	70.985	69.244	66.364	69.158	66.125	63.558	65.215	67.721	66.89	64.128	59.74
78.22	76.919	75.595	76.809	75.505	75.968	73.278	70.86	73.149	70.612	68.554	71.153	74.06	72.022	74.746	71.179	68.746	69.384	66.487	69.045	71.541	69.794	66.911	69.699	66.663	64.091	65.746	68.247	67.408	64.642	60.226
78.873	77.565	76.235	77.447	76.136	76.589	73.895	71.472	73.757	71.215	69.152	71.746	74.648	72.604	75.323	71.754	69.316	69.944	67.052	69.606	72.098	70.344	67.457	70.24	67.2	64.625	66.276	68.773	67.926	65.157	60.712
79.526	78.211	76.874	78.084	76.767	77.21	74.511	72.084	74.365	71.819	69.75	72.339	75.236	73.187	75.901	72.329	69.886	70.504	67.617	70.167	72.654	70.895	68.003	70.782	67.738	65.158	66.807	69.299	68.445	65.671	61.198
80.18	78.858	77.514	78.722	77.397	77.831	75.128	72.696	74.972	72.422	70.347	72.932	75.824	73.769	76.479	72.904	70.457	71.064	68.183	70.727	73.21	71.445	68.55	71.323	68.276	65.691	67.337	69.825	68.963	66.185	61.684
80.833	79.504	78.153	79.359	78.028	78.451	75.745	73.308	75.58	73.025	70.945	73.525	76.412	74.352	77.056	73.479	71.027	71.624	68.748	71.288	73.766	71.995	69.096	71.864	68.814	66.224	67.867	70.35	69.481	66.699	62.17
81.485	80.15	78.793	79.996	78.659	79.072	76.361	73.92	76.188	73.628	71.543	74.119	76.999	74.934	77.633	74.054	71.597	72.184	69.313	71.849	74.322	72.545	69.642	72.405	69.351	66.758	68.397	70.876	69.999	67.213	62.655
82.138	80.796	79.432	80.634	79.289	79.693	76.977	74.531	76.795	74.231	72.141	74.712	77.587	75.516	78.211	74.629	72.167	72.744	69.878	72.409	74.878	73.095	70.189	72.947	69.889	67.291	68.928	71.402	70.517	67.727	63.141
82.791	81.442	80.072	81.271	79.92	80.313	77.594	75.143	77.403	74.834	72.738	75.305	78.175	76.099	78.788	75.203	72.737	73.304	70.443	72.97	75.434	73.645	70.735	73.488	70.426	67.824	69.458	71.927	71.035	68.241	63.627
83.444	82.088	80.711	81.908	80.55	80.934	78.21	75.755	78.01	75.437	73.336	75.897	78.762	76.681	79.365	75.778	73.307	73.863	71.008	73.53	75.99	74.195	71.281	74.029	70.964	68.357	69.988	72.453	71.553	68.755	64.113
84.097	82.734	81.351	82.545	81.18	81.554	78.826	76.366	78.617	76.04	73.934	76.49	79.35	77.263	79.943	76.353	73.877	74.423	71.573	74.09	76.546	74.745	71.827	74.57	71.501	68.89	70.518	72.978	72.071	69.269	64.598
84.749	83.38	81.99	83.182	81.811	82.175	79.443	76.978	79.225	76.643	74.531	77.083	79.937	77.845	80.52	76.927	74.447	74.983	72.138	74.651	77.101	75.295	72.373	75.111	72.039	69.423	71.048	73.504	72.589	69.783	65.084
85.402	84.026	82.629	83.819	82.441	82.795	80.059	77.589	79.832	77.246	75.129	77.676	80.525	78.427	81.097	77.502	75.017	75.543	72.703	75.211	77.657	75.845	72.919	75.652	72.576	69.956	71.578	74.029	73.107	70.297	65.57
86.055	84.672	83.268	84.456	83.071	83.415	80.675	78.201	80.439	77.849	75.726	78.269	81.112	79.009	81.674	78.076	75.587	76.102	73.268	75.771	78.213	76.395	73.465	76.193	73.113	70.489	72.108	74.555	73.625	70.811	66.055
86.707	85.318	83.907	85.093	83.701	84.036	81.291	78.812	81.047	78.451	76.324	78.861	81.7	79.591	82.251	78.651	76.157	76.662	73.833	76.331	78.768	76.944	74.011	76.734	73.651	71.022	72.638	75.08	74.143	71.325	66.541
87.36	85.964	84.546	85.73	84.332	84.656	81.907	79.423	81.654	79.054	76.921	79.454	82.287	80.173	82.828	79.225	76.727	77.221	74.398	76.892	79.324	77.494	74.557	77.274	74.188	71.555	73.168	75.605	74.661	71.838	67.026
88.012	86.609	85.185	86.367	84.962	85.276	82.523	80.035	82.261	79.657	77.518	80.046	82.874	80.755	83.405	79.8	77.296	77.781	74.962	77.452	79.88	78.044	75.103	77.815	74.725	72.088	73.697	76.131	75.178	72.352	67.512
88.664	87.255	85.824	87.003	85.592	85.896	83.139	80.646	82.868	80.259	78.115	80.639	83.462	81.337	83.982	80.374	77.866	78.34	75.527	78.012	80.435	78.593	75.648	78.356	75.262	72.621	74.227	76.656	75.696	72.866	67.997
89.317	87.901	86.463	87.64	86.222	86.516	83.755	81.257	83.475	80.862	78.713	81.231	84.049	81.919	84.559	80.948	78.436	78.9	76.092	78.572	80.991	79.143	76.194	78.897	75.8	73.153	74.757	77.181	76.214	73.379	68.483
89.969	88.546	87.102	88.277	86.852	87.136	84.37	81.868	84.082	81.464	79.31	81.824	84.636	82.501	85.136	81.523	79.005	79.459	76.656	79.132	81.546	79.693	76.74	79.437	76.337	73.686	75.287	77.706	76.731	73.893	68.968
90.621	89.192	87.741	88.913	87.481	87.756	84.986	82.479	84.689	82.067	79.907	82.416	85.223	83.082	85.713	82.097	79.575	80.018	77.221	79.692	82.102	80.242	77.286	79.978	76.874	74.219	75.816	78.232	77.249	74.407	69.453
91.273	89.837	88.38	89.55	88.111	88.376	85.602	83.09	85.296	82.669	80.504	83.009	85.81	83.664	86.289	82.671	80.144	80.578	77.785	80.251	82.657	80.792	77.831	80.518	77.411	74.751	76.346	78.757	77.767	74.92	69.939
91.925	90.482	89.018	90.186	88.741	88.996	86.217	83.701	85.902	83.272	81.101	83.601	86.397	84.246	86.866	83.245	80.714	81.137	78.35	80.811	83.212	81.341	78.377	81.059	77.948	75.284	76.876	79.282	78.284	75.434	70.424
92.577	91.128	89.657	90.823	89.371	89.616	86.833	84.312	86.509	83.874	81.698	84.193	86.984	84.827	87.443	83.819	81.283	81.696	78.914	81.371	83.768	81.89	78.922	81.6	78.485	75.816	77.405	79.807	78.802	75.947	70.909
93.229	91.773	90.295	91.459	90	90.235	87.449	84.923	87.116	84.476	82.295	84.785	87.571	85.409	88.019	84.393	81.852	82.255	79.479	81.931	84.323	82.44	79.468	82.14	79.022	76.349	77.935	80.332	79.319	76.46	71.394
93.881	92.418	90.934	92.095	90.63	90.855	88.064	85.534	87.723	85.078	82.892	85.377	88.158	85.99	88.596	84.967	82.422	82.814	80.043	82.491	84.878	82.989	80.013	82.68	79.558	76.881	78.464	80.857	79.836	76.974	71.88
94.533	93.063	91.572	92.732	91.26	91.475	88.68	86.144	88.329	85.68	83.488	85.97	88.745	86.572	89.173	85.541	82.991	83.373	80.607	83.05	85.433	83.538	80.559	83.221	80.095	77.414	78.993	81.381	80.354	77.487	72.365
95.185	93.708	92.211	93.368	91.889	92.094	89.295	86.755	88.936	86.283	84.085	86.562	89.332	87.153	89.749	86.115	83.56	83.932	81.172	83.61	85.988	84.087	81.104	83.761	80.632	77.946	79.523	81.906	80.871	78	72.85
95.837	94.353	92.849	94.004	92.519	92.714	89.91	87.366	89.542	86.885	84.682	87.154	89.918	87.735	90.325	86.689	84.129	84.491	81.736	84.169	86.543	84.637	81.649	84.301	81.169	78.478	80.052	82.431	81.388	78.513	73.335
96.488	94.998	93.487	94.64	93.148	93.333	90.526	87.976	90.149	87.487	85.279	87.746	90.505	88.316	90.902	87.262	84.699	85.05	82.3	84.729	87.098	85.186	82.195	84.842	81.705	79.011	80.581	82.956	81.906	79.027	73.82
97.14	95.643	94.126	95.276	93.777	93.953	91.141	88.587	90.755	88.089	85.875	88.337	91.092	88.897	91.478	87.836	85.268	85.609	82.864	85.288	87.653	85.735	82.74	85.382	82.242	79.543	81.111	83.481	82.423	79.54	74.305
97.791	96.288	94.764	95.912	94.407	94.572	91.756	89.198	91.361	88.69	86.472	88.929	91.678	89.478	92.054	88.41	85.837	86.168	83.428	85.848	88.208	86.284	83.285	85.922	82.779	80.075	81.64	84.005	82.94	80.053	74.79
98.443	96.933	95.402	96.548	95.036	95.191	92.371	89.808	91.968	89.292	87.068	89.521	92.265	90.06	92.631	88.983	86.406	86.727	83.992	86.407	88.763	86.833	83.83	86.462	83.315	80.607	82.169	84.53	83.457	80.566	75.275
99.094	97.578	96.04	97.184	95.665	95.811	92.986	90.418	92.574	89.894	87.665	90.113	92.851	90.641	93.207	89.557	86.975	87.285	84.556	86.967	89.318	87.382	84.375	87.002	83.852	81.139	82.698	85.054	83.974	81.079	75.759
99.746	98.222	96.678	97.82	96.294	96.43	93.601	91.029	93.18	90.496	88.261	90.705	93.438	91.222	93.783	90.131	87.544	87.844	85.12	87.526	89.873	87.931	84.92	87.542	84.388	81.672	83.227	85.579	84.491	81.592	76.244
100.397	98.867	97.316	98.456	96.923	97.049	94.216	91.639	93.786	91.098	88.857	91.296	94.024	91.803	94.359	90.704	88.112	88.403	85.684	88.085	90.427	88.479	85.465	88.082	84.925	82.204	83.756	86.104	85.008	82.105	76.729
101.049	99.512	97.954	99.091	97.552	97.668	94.831	92.249	94.393	91.699	89.454	91.888	94.61	92.384	94.935	91.278	88.681	88.961	86.248	88.644	90.982	89.028	86.01	88.622	85.461	82.736	84.285	86.628	85.525	82.618	77.214
101.7	100.156	98.592	99.727	98.181	98.287	95.446	92.86	94.999	92.301	90.05	92.479	95.197	92.965	95.511	91.851	89.25	89.52	86.812	89.204	91.537	89.577	86.555	89.162	85.997	83.267	84.814	87.152	86.042	83.131	77.698
102.351	100.801	99.23	100.363	98.81	98.906	96.061	93.47	95.605	92.902	90.646	93.071	95.783	93.546	96.087	92.424	89.819	90.078	87.375	89.763	92.091	90.126	87.1	89.702	86.534	83.799	85.343	87.677	86.559	83.644	78.183
103.002	101.445	99.868	100.998	99.439	99.525	96.676	94.08	96.211	93.504	91.242	93.662	96.369	94.126	96.663	92.998	90.387	90.637	87.939	90.322	92.646	90.674	87.645	90.242	87.07	84.331	85.872	88.201	87.076	84.156	78.668
103.653	102.09	100.505	101.634	100.068	100.144	97.29	94.69	96.816	94.105	91.839	94.254	96.955	94.707	97.239	93.571	90.956	91.195	88.503	90.881	93.2	91.223	88.19	90.781	87.606	84.863	86.401	88.725	87.592	84.669	79.152
104.304	102.734	101.143	102.269	100.697	100.763	97.905	95.3	97.422	94.707	92.435	94.845	97.541	95.288	97.815	94.144	91.525	91.754	89.066	91.44	93.755	91.772	88.735	91.321	88.142	85.395	86.93	89.25	88.109	85.182	79.637
104.955	103.378	101.781	102.905	101.325	101.382	98.52	95.91	98.028	95.308	93.031	95.436	98.127	95.869	98.39	94.717	92.093	92.312	89.63	91.999	94.309	92.32	89.279	91.861	88.678	85.927	87.458	89.774	88.626	85.694	80.121
105.606	104.022	102.418	103.54	101.954	102.001	99.134	96.52	98.634	95.909	93.627	96.028	98.713	96.449	98.966	95.29	92.662	92.87	90.194	92.558	94.864	92.869	89.824	92.4	89.214	86.458	87.987	90.298	89.143	86.207	80.606
106.257	104.666	103.056	104.175	102.583	102.619	99.749	97.13	99.24	96.511	94.223	96.619	99.299	97.03	99.542	95.863	93.23	93.428	90.757	93.116	95.418	93.417	90.369	92.94	89.75	86.99	88.516	90.822	89.659	86.72	81.09
106.908	105.311	103.693	104.81	103.211	103.238	100.363	97.739	99.845	97.112	94.818	97.21	99.885	97.61	100.117	96.436	93.798	93.987	91.32	93.675	95.972	93.965	90.913	93.479	90.286	87.521	89.044	91.346	90.176	87.232	81.575
107.559	105.955	104.33	105.446	103.84	103.857	100.978	98.349	100.451	97.713	95.414	97.801	100.471	98.191	100.693	97.009	94.367	94.545	91.884	94.234	96.526	94.514	91.458	94.019	90.822	88.053	89.573	91.87	90.692	87.745	82.059
108.209	106.599	104.968	106.081	104.468	104.475	101.592	98.959	101.056	98.314	96.01	98.392	101.057	98.771	101.268	97.582	94.935	95.103	92.447	94.793	97.081	95.062	92.002	94.558	91.358	88.585	90.101	92.394	91.209	88.257	82.543
108.86	107.243	105.605	106.716	105.096	105.094	102.206	99.568	101.662	98.915	96.606	98.983	101.643	99.352	101.844	98.155	95.503	95.661	93.01	95.351	97.635	95.61	92.547	95.098	91.894	89.116	90.63	92.918	91.725	88.77	83.028
109.51	107.886	106.242	107.351	105.725	105.712	102.821	100.178	102.267	99.516	97.201	99.574	102.228	99.932	102.419	98.728	96.071	96.219	93.574	95.91	98.189	96.159	93.091	95.637	92.43	89.647	91.158	93.442	92.242	89.282	83.512
110.161	108.53	106.879	107.986	106.353	106.33	103.435	100.788	102.873	100.117	97.797	100.165	102.814	100.512	102.995	99.301	96.64	96.777	94.137	96.469	98.743	96.707	93.635	96.176	92.966	90.179	91.687	93.966	92.758	89.794	83.996
110.811	109.174	107.517	108.621	106.981	106.949	104.049	101.397	103.478	100.718	98.393	100.756	103.4	101.093	103.57	99.874	97.208	97.335	94.7	97.027	99.297	97.255	94.18	96.716	93.501	90.71	92.215	94.49	93.274	90.307	84.48
111.462	109.818	108.154	109.256	107.609	107.567	104.663	102.006	104.083	101.319	98.988	101.347	103.985	101.673	104.145	100.446	97.776	97.893	95.263	97.586	99.851	97.803	94.724	97.255	94.037	91.241	92.743	95.014	93.791	90.819	84.964
112.112	110.461	108.791	109.89	108.238	108.185	105.277	102.616	104.689	101.919	99.584	101.938	104.571	102.253	104.721	101.019	98.344	98.45	95.826	98.144	100.405	98.351	95.268	97.794	94.573	91.773	93.272	95.538	94.307	91.331	85.448
112.762	111.105	109.428	110.525	108.866	108.803	105.891	103.225	105.294	102.52	100.179	102.528	105.156	102.833	105.296	101.592	98.912	99.008	96.389	98.702	100.959	98.899	95.812	98.333	95.108	92.304	93.8	96.061	94.823	91.843	85.933
113.413	111.748	110.064	111.16	109.494	109.422	106.505	103.834	105.899	103.121	100.774	103.119	105.742	103.413	105.871	102.164	99.48	99.566	96.952	99.261	101.513	99.447	96.357	98.872	95.644	92.835	94.328	96.585	95.339	92.355	86.417
114.063	112.392	110.701	111.795	110.122	110.04	107.119	104.444	106.504	103.721	101.37	103.71	106.327	103.993	106.446	102.737	100.047	100.124	97.515	99.819	102.066	99.995	96.901	99.411	96.179	93.366	94.856	97.109	95.855	92.867	86.901
114.713	113.035	111.338	112.429	110.749	110.658	107.733	105.053	107.109	104.322	101.965	104.3	106.912	104.573	107.021	103.309	100.615	100.681	98.078	100.377	102.62	100.543	97.445	99.95	96.715	93.897	95.384	97.632	96.371	93.379	87.384
115.363	113.679	111.975	113.064	111.377	111.276	108.347	105.662	107.714	104.923	102.56	104.891	107.498	105.153	107.596	103.881	101.183	101.239	98.641	100.935	103.174	101.091	97.989	100.489	97.25	94.428	95.912	98.156	96.887	93.891	87.868
116.013	114.322	112.611	113.698	112.005	111.894	108.96	106.271	108.319	105.523	103.155	105.481	108.083	105.733	108.171	104.454	101.751	101.796	99.203	101.494	103.727	101.638	98.533	101.028	97.786	94.959	96.44	98.679	97.403	94.403	88.352
116.663	114.965	113.248	114.333	112.633	112.511	109.574	106.88	108.924	106.124	103.75	106.072	108.668	106.313	108.746	105.026	102.318	102.354	99.766	102.052	104.281	102.186	99.077	101.567	98.321	95.49	96.968	99.203	97.919	94.915	88.836
117.313	115.609	113.885	114.967	113.26	113.129	110.188	107.489	109.529	106.724	104.346	106.662	109.253	106.893	109.321	105.598	102.886	102.911	100.329	102.61	104.835	102.734	99.62	102.106	98.856	96.021	97.496	99.726	98.435	95.427	89.32
117.963	116.252	114.521	115.601	113.888	113.747	110.801	108.098	110.133	107.324	104.941	107.252	109.838	107.472	109.896	106.171	103.454	103.469	100.892	103.168	105.388	103.281	100.164	102.645	99.392	96.552	98.024	100.249	98.951	95.939	89.804
118.613	116.895	115.158	116.235	114.516	114.365	111.415	108.707	110.738	107.924	105.535	107.843	110.423	108.052	110.47	106.743	104.021	104.026	101.454	103.726	105.942	103.829	100.708	103.184	99.927	97.083	98.552	100.773	99.467	96.451	90.287
119.262	117.538	115.794	116.87	115.143	114.982	112.028	109.316	111.343	108.525	106.13	108.433	111.008	108.632	111.045	107.315	104.589	104.583	102.017	104.284	106.495	104.377	101.252	103.722	100.462	97.614	99.08	101.296	99.983	96.963	90.771
119.912	118.181	116.43	117.504	115.771	115.6	112.642	109.924	111.947	109.125	106.725	109.023	111.593	109.211	111.62	107.887	105.156	105.141	102.579	104.841	107.048	104.924	101.795	104.261	100.997	98.144	99.607	101.819	100.498	97.474	91.255
120.561	118.824	117.067	118.138	116.398	116.217	113.255	110.533	112.552	109.725	107.32	109.613	112.178	109.791	112.194	108.459	105.723	105.698	103.142	105.399	107.602	105.472	102.339	104.799	101.532	98.675	100.135	102.342	101.014	97.986	91.738
121.211	119.467	117.703	118.772	117.025	116.835	113.868	111.142	113.157	110.325	107.915	110.203	112.763	110.37	112.769	109.031	106.291	106.255	103.704	105.957	108.155	106.019	102.883	105.338	102.067	99.206	100.663	102.866	101.53	98.498	92.222
121.861	120.109	118.339	119.406	117.653	117.452	114.482	111.75	113.761	110.925	108.51	110.793	113.348	110.95	113.343	109.603	106.858	106.812	104.266	106.515	108.708	106.566	103.426	105.877	102.602	99.736	101.19	103.389	102.045	99.009	92.705
122.51	120.752	118.975	120.04	118.28	118.07	115.095	112.359	114.365	111.525	109.104	111.383	113.932	111.529	113.918	110.175	107.425	107.369	104.829	107.072	109.261	107.114	103.97	106.415	103.137	100.267	101.718	103.912	102.561	99.521	93.189
123.159	121.395	119.611	120.674	118.907	118.687	115.708	112.967	114.97	112.125	109.699	111.973	114.517	112.108	114.492	110.747	107.992	107.926	105.391	107.63	109.814	107.661	104.513	106.953	103.672	100.797	102.245	104.435	103.076	100.032	93.672
123.809	122.037	120.247	121.307	119.534	119.304	116.321	113.576	115.574	112.725	110.293	112.563	115.101	112.688	115.067	111.318	108.56	108.483	105.953	108.188	110.368	108.208	105.057	107.492	104.207	101.328	102.773	104.958	103.592	100.544	94.156
124.458	122.68	120.883	121.941	120.161	119.921	116.934	114.184	116.178	113.325	110.888	113.153	115.686	113.267	115.641	111.89	109.127	109.04	106.515	108.745	110.921	108.755	105.6	108.03	104.742	101.858	103.3	105.481	104.107	101.055	94.639
125.107	123.323	121.519	122.575	120.788	120.539	117.547	114.792	116.782	113.924	111.482	113.742	116.271	113.846	116.215	112.462	109.694	109.597	107.077	109.303	111.474	109.302	106.143	108.568	105.276	102.389	103.828	106.004	104.623	101.566	95.122
125.756	123.965	122.155	123.208	121.415	121.156	118.16	115.401	117.387	114.524	112.077	114.332	116.855	114.425	116.789	113.033	110.261	110.154	107.639	109.86	112.026	109.85	106.686	109.107	105.811	102.919	104.355	106.526	105.138	102.078	95.605
126.405	124.607	122.79	123.842	122.042	121.773	118.773	116.009	117.991	115.124	112.671	114.922	117.439	115.004	117.363	113.605	110.828	110.711	108.201	110.418	112.579	110.397	107.23	109.645	106.346	103.449	104.882	107.049	105.653	102.589	96.089
127.054	125.25	123.426	124.476	122.669	122.39	119.386	116.617	118.595	115.723	113.265	115.511	118.024	115.583	117.938	114.176	111.395	111.267	108.763	110.975	113.132	110.944	107.773	110.183	106.88	103.98	105.41	107.572	106.169	103.1	96.572
127.703	125.892	124.062	125.109	123.296	123.007	119.999	117.225	119.199	116.323	113.86	116.101	118.608	116.162	118.512	114.748	111.961	111.824	109.325	111.532	113.685	111.49	108.316	110.721	107.415	104.51	105.937	108.095	106.684	103.611	97.055
128.352	126.534	124.697	125.742	123.923	123.624	120.611	117.833	119.803	116.922	114.454	116.69	119.192	116.741	119.086	115.319	112.528	112.381	109.887	112.089	114.238	112.037	108.859	111.259	107.949	105.04	106.464	108.617	107.199	104.123	97.538
129.001	127.176	125.333	126.376	124.549	124.24	121.224	118.441	120.407	117.522	115.048	117.28	119.777	117.32	119.66	115.891	113.095	112.937	110.449	112.647	114.79	112.584	109.402	111.797	108.484	105.57	106.991	109.14	107.714	104.634	98.021
129.65	127.819	125.968	127.009	125.176	124.857	121.836	119.049	121.01	118.121	115.642	117.869	120.361	117.899	120.234	116.462	113.662	113.494	111.011	113.204	115.343	113.131	109.945	112.335	109.018	106.1	107.518	109.663	108.229	105.145	98.504
130.299	128.461	126.604	127.642	125.802	125.474	122.449	119.657	121.614	118.72	116.236	118.459	120.945	118.478	120.807	117.033	114.228	114.05	111.572	113.761	115.896	113.678	110.488	112.873	109.553	106.63	108.045	110.185	108.744	105.656	98.987
130.947	129.103	127.239	128.275	126.429	126.091	123.062	120.265	122.218	119.32	116.83	119.048	121.529	119.056	121.381	117.605	114.795	114.607	112.134	114.318	116.448	114.224	111.031	113.411	110.087	107.16	108.572	110.708	109.259	106.167	99.47
131.596	129.745	127.875	128.909	127.055	126.707	123.674	120.873	122.822	119.919	117.424	119.637	122.113	119.635	121.955	118.176	115.362	115.163	112.696	114.875	117.001	114.771	111.574	113.949	110.621	107.69	109.099	111.23	109.774	106.678	99.953
132.244	130.386	128.51	129.542	127.682	127.324	124.286	121.48	123.425	120.518	118.018	120.226	122.697	120.214	122.529	118.747	115.928	115.72	113.257	115.432	117.553	115.318	112.117	114.487	111.156	108.22	109.626	111.752	110.289	107.189	100.436
132.893	131.028	129.145	130.175	128.308	127.94	124.899	122.088	124.029	121.117	118.612	120.815	123.281	120.792	123.102	119.318	116.494	116.276	113.819	115.989	118.106	115.864	112.659	115.024	111.69	108.75	110.153	112.275	110.804	107.699	100.919
133.541	131.67	129.78	130.808	128.934	128.557	125.511	122.696	124.632	121.716	119.205	121.405	123.865	121.371	123.676	119.889	117.061	116.832	114.38	116.546	118.658	116.411	113.202	115.562	112.224	109.279	110.68	112.797	111.319	108.21	101.402
134.19	132.312	130.415	131.441	129.561	129.173	126.123	123.303	125.236	122.315	119.799	121.994	124.448	121.949	124.25	120.46	117.627	117.388	114.942	117.103	119.21	116.957	113.745	116.1	112.758	109.809	111.207	113.319	111.834	108.721	101.884
134.838	132.953	131.05	132.073	130.187	129.789	126.735	123.911	125.839	122.914	120.393	122.583	125.032	122.527	124.823	121.031	118.194	117.945	115.503	117.659	119.763	117.504	114.287	116.637	113.292	110.339	111.733	113.842	112.348	109.232	102.367
135.486	133.595	131.685	132.706	130.813	130.406	127.348	124.518	126.442	123.513	120.986	123.172	125.616	123.106	125.396	121.602	118.76	118.501	116.064	118.216	120.315	118.05	114.83	117.175	113.826	110.869	112.26	114.364	112.863	109.742	102.85
136.134	134.237	132.32	133.339	131.439	131.022	127.96	125.126	127.046	124.112	121.58	123.76	126.199	123.684	125.97	122.173	119.326	119.057	116.626	118.773	120.867	118.596	115.372	117.712	114.36	111.398	112.787	114.886	113.378	110.253	103.332
136.783	134.878	132.955	133.972	132.065	131.638	128.572	125.733	127.649	124.711	122.173	124.349	126.783	124.262	126.543	122.743	119.892	119.613	117.187	119.329	121.419	119.143	115.915	118.25	114.894	111.928	113.313	115.408	113.892	110.764	103.815
137.431	135.519	133.59	134.604	132.691	132.254	129.184	126.34	128.252	125.31	122.767	124.938	127.367	124.841	127.117	123.314	120.458	120.169	117.748	119.886	121.971	119.689	116.457	118.787	115.428	112.457	113.84	115.93	114.407	111.274	104.298
138.079	136.161	134.225	135.237	133.317	132.87	129.795	126.948	128.855	125.908	123.36	125.527	127.95	125.419	127.69	123.885	121.024	120.725	118.309	120.442	122.523	120.235	117	119.325	115.962	112.987	114.366	116.452	114.922	111.785	104.78
138.727	136.802	134.859	135.869	133.943	133.486	130.407	127.555	129.458	126.507	123.954	126.115	128.534	125.997	128.263	124.455	121.59	121.28	118.87	120.999	123.075	120.781	117.542	119.862	116.496	113.516	114.893	116.974	115.436	112.295	105.263
139.375	137.443	135.494	136.502	134.569	134.102	131.019	128.162	130.061	127.106	124.547	126.704	129.117	126.575	128.836	125.026	122.156	121.836	119.431	121.555	123.627	121.327	118.084	120.399	117.029	114.046	115.419	117.496	115.95	112.806	105.745
140.022	138.085	136.128	137.134	135.194	134.718	131.631	128.769	130.664	127.704	125.14	127.293	129.7	127.153	129.409	125.597	122.722	122.392	119.992	122.112	124.179	121.873	118.627	120.936	117.563	114.575	115.946	118.018	116.465	113.316	106.227
140.67	138.726	136.763	137.766	135.82	135.334	132.242	129.376	131.267	128.303	125.733	127.881	130.284	127.731	129.982	126.167	123.288	122.948	120.553	122.668	124.731	122.419	119.169	121.474	118.097	115.104	116.472	118.54	116.979	113.826	106.71
141.318	139.367	137.397	138.399	136.446	135.95	132.854	129.983	131.87	128.901	126.326	128.47	130.867	128.309	130.555	126.737	123.854	123.503	121.114	123.224	125.283	122.965	119.711	122.011	118.63	115.633	116.998	119.061	117.494	114.337	107.192
141.966	140.008	138.032	139.031	137.071	136.565	133.466	130.59	132.473	129.499	126.919	129.058	131.45	128.887	131.128	127.308	124.42	124.059	121.675	123.781	125.835	123.511	120.253	122.548	119.164	116.163	117.524	119.583	118.008	114.847	107.674
142.613	140.649	138.666	139.663	137.697	137.181	134.077	131.197	133.076	130.098	127.513	129.646	132.033	129.464	131.701	127.878	124.985	124.615	122.236	124.337	126.386	124.057	120.795	123.085	119.697	116.692	118.051	120.105	118.522	115.357	108.156
143.261	141.29	139.3	140.295	138.322	137.797	134.689	131.804	133.678	130.696	128.105	130.235	132.616	130.042	132.274	128.448	125.551	125.17	122.796	124.893	126.938	124.603	121.337	123.622	120.231	117.221	118.577	120.626	119.036	115.867	108.639
143.908	141.93	139.935	140.927	138.947	138.412	135.3	132.41	134.281	131.294	128.698	130.823	133.199	130.62	132.847	129.019	126.117	125.726	123.357	125.449	127.49	125.149	121.879	124.159	120.764	117.75	119.103	121.148	119.55	116.377	109.121
144.556	142.571	140.569	141.559	139.573	139.028	135.911	133.017	134.884	131.892	129.291	131.411	133.782	131.198	133.42	129.589	126.682	126.281	123.918	126.005	128.041	125.694	122.421	124.696	121.298	118.279	119.629	121.67	120.064	116.887	109.603
145.203	143.212	141.203	142.191	140.198	139.643	136.523	133.624	135.486	132.49	129.884	131.999	134.365	131.775	133.992	130.159	127.248	126.837	124.478	126.561	128.593	126.24	122.963	125.233	121.831	118.808	120.155	122.191	120.578	117.397	110.085
145.85	143.853	141.837	142.823	140.823	140.259	137.134	134.23	136.089	133.088	130.477	132.587	134.948	132.353	134.565	130.729	127.813	127.392	125.039	127.117	129.144	126.786	123.505	125.769	122.364	119.337	120.681	122.713	121.092	117.907	110.567
146.498	144.493	142.471	143.455	141.448	140.874	137.745	134.837	136.691	133.686	131.07	133.175	135.531	132.93	135.138	131.299	128.379	127.947	125.599	127.673	129.696	127.331	124.046	126.306	122.898	119.866	121.207	123.234	121.606	118.417	111.049
147.145	145.134	143.105	144.086	142.073	141.489	138.356	135.443	137.293	134.284	131.662	133.763	136.114	133.508	135.71	131.869	128.944	128.502	126.16	128.229	130.247	127.877	124.588	126.843	123.431	120.395	121.733	123.755	122.12	118.927	111.531
147.792	145.774	143.739	144.718	142.698	142.104	138.967	136.05	137.896	134.882	132.255	134.351	136.696	134.085	136.283	132.439	129.509	129.058	126.72	128.785	130.798	128.422	125.13	127.38	123.964	120.923	122.258	124.277	122.634	119.437	112.013
148.439	146.415	144.372	145.35	143.323	142.719	139.578	136.656	138.498	135.48	132.847	134.939	137.279	134.662	136.855	133.009	130.075	129.613	127.281	129.34	131.349	128.968	125.672	127.916	124.497	121.452	122.784	124.798	123.148	119.947	112.495
149.086	147.055	145.006	145.981	143.948	143.335	140.189	137.262	139.1	136.078	133.44	135.527	137.861	135.24	137.427	133.579	130.64	130.168	127.841	129.896	131.901	129.513	126.213	128.453	125.03	121.981	123.31	125.319	123.662	120.457	112.977
149.733	147.695	145.64	146.613	144.573	143.95	140.8	137.869	139.702	136.676	134.032	136.115	138.444	135.817	138	134.148	131.205	130.723	128.401	130.452	132.452	130.058	126.755	128.989	125.563	122.509	123.836	125.84	124.175	120.966	113.458
150.38	148.335	146.273	147.244	145.198	144.565	141.411	138.475	140.304	137.273	134.625	136.702	139.027	136.394	138.572	134.718	131.77	131.278	128.961	131.007	133.003	130.604	127.296	129.526	126.096	123.038	124.361	126.362	124.689	121.476	113.94
151.027	148.976	146.907	147.876	145.823	145.18	142.022	139.081	140.906	137.871	135.217	137.29	139.609	136.971	139.144	135.288	132.335	131.833	129.521	131.563	133.554	131.149	127.838	130.062	126.629	123.567	124.887	126.883	125.203	121.986	114.422
151.673	149.616	147.541	148.507	146.447	145.794	142.632	139.687	141.508	138.468	135.809	137.878	140.191	137.548	139.716	135.857	132.9	132.388	130.082	132.118	134.105	131.694	128.379	130.599	127.162	124.095	125.412	127.404	125.716	122.495	114.903
152.32	150.256	148.174	149.138	147.072	146.409	143.243	140.293	142.11	139.066	136.402	138.465	140.774	138.125	140.289	136.427	133.465	132.942	130.642	132.674	134.656	132.239	128.92	131.135	127.695	124.624	125.938	127.925	126.23	123.005	115.385
152.967	150.896	148.807	149.769	147.697	147.024	143.854	140.899	142.712	139.663	136.994	139.053	141.356	138.702	140.861	136.996	134.03	133.497	131.202	133.229	135.207	132.784	129.462	131.671	128.227	125.152	126.463	128.446	126.743	123.514	115.867
153.613	151.536	149.441	150.4	148.321	147.639	144.464	141.505	143.314	140.261	137.586	139.64	141.938	139.279	141.433	137.566	134.595	134.052	131.762	133.784	135.758	133.329	130.003	132.207	128.76	125.68	126.989	128.967	127.257	124.024	116.348
154.26	152.176	150.074	151.032	148.946	148.253	145.075	142.111	143.916	140.858	138.178	140.228	142.52	139.856	142.005	138.135	135.16	134.607	132.321	134.34	136.309	133.874	130.544	132.744	129.293	126.209	127.514	129.487	127.77	124.533	116.83
154.906	152.815	150.707	151.663	149.57	148.868	145.685	142.717	144.517	141.455	138.77	140.815	143.103	140.433	142.577	138.705	135.724	135.161	132.881	134.895	136.859	134.419	131.085	133.28	129.825	126.737	128.039	130.008	128.284	125.043	117.311
155.553	153.455	151.34	152.294	150.194	149.483	146.296	143.323	145.119	142.053	139.362	141.402	143.685	141.01	143.149	139.274	136.289	135.716	133.441	135.45	137.41	134.964	131.626	133.816	130.358	127.265	128.565	130.529	128.797	125.552	117.792
156.199	154.095	151.973	152.924	150.819	150.097	146.906	143.928	145.721	142.65	139.954	141.989	144.267	141.586	143.72	139.843	136.854	136.27	134.001	136.005	137.961	135.509	132.167	134.352	130.89	127.793	129.09	131.05	129.31	126.061	118.274
156.845	154.734	152.607	153.555	151.443	150.711	147.516	144.534	146.322	143.247	140.546	142.577	144.849	142.163	144.292	140.412	137.418	136.825	134.56	136.56	138.511	136.054	132.708	134.888	131.423	128.321	129.615	131.57	129.823	126.57	118.755
157.491	155.374	153.24	154.186	152.067	151.326	148.126	145.139	146.924	143.844	141.137	143.164	145.431	142.74	144.864	140.982	137.983	137.379	135.12	137.116	139.062	136.599	133.249	135.424	131.955	128.85	130.14	132.091	130.337	127.08	119.236
158.138	156.014	153.872	154.817	152.691	151.94	148.737	145.745	147.525	144.441	141.729	143.751	146.012	143.316	145.436	141.551	138.547	137.934	135.68	137.671	139.613	137.143	133.79	135.96	132.488	129.378	130.665	132.612	130.85	127.589	119.718
158.784	156.653	154.505	155.448	153.315	152.554	149.347	146.35	148.126	145.038	142.321	144.338	146.594	143.893	146.007	142.12	139.112	138.488	136.239	138.225	140.163	137.688	134.331	136.496	133.02	129.906	131.19	133.132	131.363	128.098	120.199
159.43	157.292	155.138	156.078	153.939	153.169	149.957	146.956	148.728	145.635	142.912	144.925	147.176	144.469	146.579	142.689	139.676	139.042	136.799	138.78	140.713	138.233	134.872	137.032	133.552	130.434	131.715	133.653	131.876	128.607	120.68
160.076	157.932	155.771	156.709	154.563	153.783	150.567	147.561	149.329	146.232	143.504	145.512	147.758	145.046	147.15	143.258	140.241	139.597	137.358	139.335	141.264	138.777	135.413	137.567	134.085	130.961	132.24	134.173	132.389	129.116	121.161
160.722	158.571	156.404	157.339	155.187	154.397	151.177	148.167	149.93	146.829	144.095	146.099	148.339	145.622	147.722	143.827	140.805	140.151	137.918	139.89	141.814	139.322	135.953	138.103	134.617	131.489	132.765	134.694	132.902	129.625	121.642
161.367	159.21	157.036	157.97	155.811	155.011	151.787	148.772	150.531	147.425	144.687	146.685	148.921	146.198	148.293	144.395	141.369	140.705	138.477	140.445	142.364	139.866	136.494	138.639	135.149	132.017	133.29	135.214	133.415	130.134	122.123
162.013	159.849	157.669	158.6	156.435	155.625	152.396	149.377	151.133	148.022	145.278	147.272	149.502	146.774	148.864	144.964	141.933	141.259	139.036	140.999	142.915	140.41	137.035	139.174	135.681	132.545	133.815	135.734	133.928	130.643	122.604
162.659	160.488	158.301	159.23	157.058	156.239	153.006	149.982	151.734	148.619	145.87	147.859	150.084	147.351	149.436	145.533	142.497	141.813	139.595	141.554	143.465	140.955	137.575	139.71	136.213	133.073	134.339	136.255	134.441	131.151	123.085
163.305	161.127	158.934	159.861	157.682	156.852	153.616	150.587	152.335	149.215	146.461	148.446	150.665	147.927	150.007	146.102	143.062	142.367	140.155	142.109	144.015	141.499	138.116	140.245	136.745	133.6	134.864	136.775	134.953	131.66	123.566
163.95	161.766	159.566	160.491	158.306	157.466	154.226	151.192	152.935	149.812	147.052	149.032	151.247	148.503	150.578	146.67	143.626	142.921	140.714	142.663	144.565	142.043	138.656	140.781	137.277	134.128	135.389	137.295	135.466	132.169	124.047
164.596	162.405	160.198	161.121	158.929	158.08	154.835	151.797	153.536	150.408	147.643	149.619	151.828	149.079	151.149	147.239	144.19	143.475	141.273	143.218	145.115	142.588	139.197	141.316	137.809	134.655	135.913	137.815	135.979	132.678	124.528
165.241	163.044	160.831	161.751	159.552	158.694	155.445	152.402	154.137	151.004	148.235	150.205	152.409	149.655	151.72	147.807	144.753	144.029	141.832	143.772	145.665	143.132	139.737	141.852	138.341	135.183	136.438	138.335	136.491	133.186	125.008
165.887	163.683	161.463	162.381	160.176	159.307	156.054	153.007	154.738	151.601	148.826	150.792	152.991	150.231	152.291	148.376	145.317	144.583	142.391	144.327	146.215	143.676	140.277	142.387	138.873	135.71	136.962	138.855	137.004	133.695	125.489
166.532	164.322	162.095	163.011	160.799	159.921	156.664	153.612	155.339	152.197	149.417	151.378	153.572	150.807	152.862	148.944	145.881	145.136	142.95	144.881	146.765	144.22	140.817	142.922	139.404	136.238	137.487	139.375	137.516	134.203	125.97
167.177	164.96	162.727	163.641	161.423	160.534	157.273	154.217	155.939	152.793	150.008	151.964	154.153	151.382	153.433	149.513	146.445	145.69	143.509	145.435	147.315	144.764	141.358	143.458	139.936	136.765	138.011	139.895	138.029	134.712	126.451
167.823	165.599	163.359	164.271	162.046	161.148	157.882	154.821	156.54	153.39	150.599	152.55	154.734	151.958	154.004	150.081	147.009	146.244	144.067	145.989	147.864	145.308	141.898	143.993	140.468	137.293	138.536	140.415	138.541	135.22	126.931
168.468	166.238	163.991	164.901	162.669	161.761	158.492	155.426	157.14	153.986	151.189	153.137	155.315	152.534	154.575	150.649	147.572	146.797	144.626	146.544	148.414	145.852	142.438	144.528	141	137.82	139.06	140.935	139.054	135.729	127.412
169.113	166.876	164.623	165.53	163.292	162.375	159.101	156.03	157.741	154.582	151.78	153.723	155.896	153.109	155.146	151.217	148.136	147.351	145.185	147.098	148.964	146.396	142.978	145.063	141.531	138.347	139.584	141.455	139.566	136.237	127.892
169.758	167.514	165.255	166.16	163.915	162.988	159.71	156.635	158.341	155.178	152.371	154.309	156.477	153.685	155.717	151.786	148.7	147.904	145.743	147.652	149.513	146.939	143.518	145.598	142.063	138.874	140.108	141.974	140.079	136.746	128.373
170.403	168.153	165.887	166.79	164.538	163.601	160.319	157.239	158.942	155.774	152.962	154.895	157.058	154.261	156.287	152.354	149.263	148.458	146.302	148.206	150.063	147.483	144.058	146.133	142.594	139.401	140.633	142.494	140.591	137.254	128.853
171.048	168.791	166.518	167.419	165.161	164.214	160.928	157.844	159.542	156.37	153.552	155.481	157.638	154.836	156.858	152.922	149.827	149.011	146.861	148.76	150.613	148.027	144.598	146.668	143.126	139.928	141.157	143.014	141.103	137.762	129.334
171.693	169.429	167.15	168.049	165.784	164.827	161.537	158.448	160.142	156.965	154.143	156.067	158.219	155.412	157.428	153.49	150.39	149.564	147.419	149.314	151.162	148.571	145.138	147.203	143.657	140.455	141.681	143.533	141.615	138.27	129.814
172.337	170.068	167.781	168.678	166.407	165.44	162.146	159.052	160.742	157.561	154.733	156.653	158.8	155.987	157.999	154.058	150.953	150.118	147.978	149.868	151.711	149.114	145.678	147.738	144.188	140.982	142.205	144.053	142.127	138.778	130.294
172.982	170.706	168.413	169.307	167.029	166.053	162.755	159.657	161.343	158.157	155.324	157.239	159.38	156.562	158.569	154.626	151.517	150.671	148.536	150.422	152.261	149.658	146.217	148.272	144.72	141.509	142.729	144.573	142.639	139.286	130.774
173.627	171.344	169.044	169.937	167.652	166.666	163.363	160.261	161.943	158.753	155.914	157.824	159.961	157.138	159.14	155.193	152.08	151.224	149.094	150.975	152.81	150.201	146.757	148.807	145.251	142.036	143.253	145.092	143.151	139.795	131.255
174.271	171.982	169.676	170.566	168.275	167.279	163.972	160.865	162.543	159.348	156.505	158.41	160.541	157.713	159.71	155.761	152.643	151.777	149.653	151.529	153.359	150.745	147.297	149.342	145.782	142.563	143.777	145.611	143.663	140.303	131.735
174.916	172.62	170.307	171.195	168.897	167.892	164.581	161.469	163.143	159.944	157.095	158.996	161.122	158.288	160.28	156.329	153.206	152.33	150.211	152.083	153.909	151.288	147.836	149.877	146.313	143.09	144.301	146.131	144.175	140.81	132.215
175.56	173.257	170.939	171.824	169.52	168.505	165.189	162.073	163.742	160.539	157.685	159.581	161.702	158.863	160.851	156.897	153.769	152.883	150.769	152.636	154.458	151.831	148.376	150.411	146.844	143.617	144.824	146.65	144.687	141.318	132.695
176.205	173.895	171.57	172.453	170.142	169.117	165.798	162.677	164.342	161.135	158.275	160.167	162.283	159.438	161.421	157.464	154.332	153.436	151.327	153.19	155.007	152.375	148.916	150.946	147.375	144.143	145.348	147.169	145.199	141.826	133.175
176.849	174.533	172.201	173.082	170.765	169.73	166.407	163.281	164.942	161.73	158.866	160.752	162.863	160.013	161.991	158.032	154.895	153.989	151.885	153.744	155.556	152.918	149.455	151.48	147.906	144.67	145.872	147.689	145.711	142.334	133.655
177.494	175.171	172.832	173.711	171.387	170.342	167.015	163.885	165.542	162.325	159.456	161.338	163.443	160.588	162.561	158.599	155.458	154.542	152.443	154.297	156.105	153.461	149.995	152.015	148.437	145.197	146.396	148.208	146.223	142.842	134.135
178.138	175.808	173.463	174.34	172.009	170.955	167.623	164.488	166.142	162.921	160.046	161.923	164.023	161.163	163.131	159.167	156.021	155.095	153.001	154.85	156.654	154.004	150.534	152.549	148.968	145.723	146.919	148.727	146.734	143.35	134.615
178.782	176.446	174.094	174.969	172.632	171.567	168.232	165.092	166.741	163.516	160.636	162.509	164.604	161.738	163.701	159.734	156.584	155.648	153.559	155.404	157.203	154.548	151.073	153.083	149.499	146.25	147.443	149.246	147.246	143.857	135.095
179.426	177.083	174.725	175.598	173.254	172.18	168.84	165.696	167.341	164.111	161.225	163.094	165.184	162.313	164.271	160.302	157.147	156.2	154.117	155.957	157.752	155.091	151.613	153.618	150.03	146.776	147.966	149.765	147.758	144.365	135.575
180.07	177.721	175.356	176.226	173.876	172.792	169.448	166.299	167.94	164.706	161.815	163.679	165.764	162.887	164.841	160.869	157.71	156.753	154.675	156.51	158.301	155.634	152.152	154.152	150.56	147.303	148.49	150.284	148.269	144.872	136.055
180.714	178.358	175.987	176.855	174.498	173.404	170.056	166.903	168.54	165.301	162.405	164.264	166.344	163.462	165.411	161.436	158.272	157.306	155.233	157.064	158.849	156.177	152.691	154.686	151.091	147.829	149.013	150.803	148.781	145.38	136.534
181.358	178.996	176.617	177.484	175.12	174.017	170.664	167.506	169.139	165.896	162.995	164.849	166.924	164.037	165.98	162.003	158.835	157.858	155.791	157.617	159.398	156.719	153.23	155.22	151.622	148.355	149.536	151.322	149.292	145.888	137.014
182.002	179.633	177.248	178.112	175.742	174.629	171.272	168.11	169.738	166.491	163.585	165.434	167.503	164.611	166.55	162.571	159.397	158.411	156.348	158.17	159.947	157.262	153.769	155.754	152.152	148.882	150.06	151.841	149.804	146.395	137.494
182.646	180.27	177.879	178.741	176.364	175.241	171.88	168.713	170.338	167.086	164.174	166.019	168.083	165.186	167.12	163.138	159.96	158.963	156.906	158.723	160.495	157.805	154.308	156.288	152.683	149.408	150.583	152.36	150.315	146.902	137.973
183.289	180.907	178.509	179.369	176.985	175.853	172.488	169.316	170.937	167.681	164.764	166.604	168.663	165.76	167.689	163.705	160.522	159.516	157.464	159.276	161.044	158.348	154.847	156.822	153.213	149.934	151.106	152.878	150.827	147.41	138.453
183.933	181.544	179.14	179.997	177.607	176.465	173.096	169.92	171.536	168.276	165.353	167.189	169.243	166.335	168.259	164.272	161.085	160.068	158.021	159.829	161.592	158.891	155.386	157.356	153.744	150.46	151.629	153.397	151.338	147.917	138.932
184.577	182.181	179.77	180.626	178.229	177.077	173.704	170.523	172.135	168.87	165.943	167.774	169.822	166.909	168.829	164.839	161.647	160.62	158.579	160.382	162.141	159.433	155.925	157.89	154.274	150.986	152.153	153.916	151.849	148.424	139.412
185.22	182.818	180.401	181.254	178.85	177.689	174.312	171.126	172.734	169.465	166.532	168.359	170.402	167.483	169.398	165.405	162.209	161.173	159.136	160.935	162.689	159.976	156.464	158.424	154.805	151.512	152.676	154.434	152.36	148.932	139.891
185.864	183.455	181.031	181.882	179.472	178.301	174.919	171.729	173.333	170.06	167.122	168.943	170.981	168.057	169.967	165.972	162.772	161.725	159.693	161.487	163.238	160.518	157.003	158.958	155.335	152.038	153.199	154.953	152.871	149.439	140.371
186.507	184.092	181.661	182.51	180.093	178.912	175.527	172.332	173.932	170.654	167.711	169.528	171.561	168.632	170.537	166.539	163.334	162.277	160.251	162.04	163.786	161.061	157.541	159.492	155.865	152.564	153.722	155.472	153.383	149.946	140.85
187.15	184.728	182.291	183.138	180.715	179.524	176.135	172.935	174.531	171.249	168.3	170.113	172.14	169.206	171.106	167.106	163.896	162.829	160.808	162.593	164.334	161.603	158.08	160.025	156.395	153.09	154.245	155.99	153.894	150.453	141.329
187.794	185.365	182.921	183.766	181.336	180.136	176.742	173.538	175.13	171.843	168.889	170.697	172.72	169.78	171.675	167.672	164.458	163.381	161.365	163.146	164.882	162.146	158.619	160.559	156.926	153.616	154.767	156.508	154.405	150.96	141.809
188.437	186.002	183.552	184.394	181.957	180.747	177.35	174.141	175.729	172.437	169.478	171.282	173.299	170.354	172.244	168.239	165.02	163.933	161.922	163.698	165.431	162.688	159.157	161.093	157.456	154.142	155.29	157.027	154.916	151.467	142.288
189.08	186.638	184.182	185.022	182.579	181.359	177.957	174.744	176.327	173.032	170.067	171.866	173.878	170.928	172.813	168.806	165.582	164.485	162.479	164.251	165.979	163.23	159.696	161.626	157.986	154.667	155.813	157.545	155.426	151.974	142.767
189.723	187.275	184.812	185.65	183.2	181.97	178.564	175.346	176.926	173.626	170.656	172.451	174.457	171.502	173.383	169.372	166.144	165.037	163.036	164.803	166.527	163.773	160.234	162.16	158.516	155.193	156.336	158.063	155.937	152.481	143.246
190.366	187.911	185.441	186.277	183.821	182.581	179.171	175.949	177.525	174.22	171.245	173.035	175.037	172.076	173.952	169.939	166.706	165.589	163.593	165.356	167.075	164.315	160.773	162.693	159.046	155.719	156.858	158.582	156.448	152.988	143.725
191.009	188.548	186.071	186.905	184.442	183.193	179.779	176.552	178.123	174.814	171.834	173.619	175.616	172.649	174.52	170.505	167.268	166.14	164.15	165.908	167.623	164.857	161.311	163.227	159.576	156.244	157.381	159.1	156.959	153.494	144.204
191.652	189.184	186.701	187.532	185.063	183.804	180.386	177.154	178.722	175.408	172.423	174.203	176.195	173.223	175.089	171.071	167.83	166.692	164.707	166.46	168.17	165.399	161.849	163.76	160.106	156.77	157.904	159.618	157.47	154.001	144.683
192.295	189.82	187.331	188.16	185.684	184.415	180.993	177.757	179.32	176.002	173.012	174.787	176.774	173.797	175.658	171.638	168.391	167.244	165.264	167.013	168.718	165.941	162.388	164.293	160.635	157.295	158.426	160.136	157.98	154.508	145.162
192.938	190.456	187.96	188.787	186.305	185.026	181.6	178.359	179.918	176.596	173.601	175.372	177.353	174.371	176.227	172.204	168.953	167.795	165.821	167.565	169.266	166.483	162.926	164.827	161.165	157.821	158.949	160.654	158.491	155.015	145.641
193.58	191.093	188.59	189.415	186.926	185.637	182.207	178.961	180.517	177.19	174.189	175.956	177.931	174.944	176.796	172.77	169.515	168.347	166.378	168.117	169.814	167.025	163.464	165.36	161.695	158.346	159.471	161.172	159.002	155.521	146.12
194.223	191.729	189.219	190.042	187.546	186.249	182.814	179.564	181.115	177.784	174.778	176.54	178.51	175.518	177.364	173.336	170.076	168.899	166.934	168.669	170.361	167.567	164.002	165.893	162.224	158.871	159.994	161.69	159.512	156.028	146.599
194.866	192.365	189.849	190.67	188.167	186.859	183.421	180.166	181.713	178.378	175.366	177.124	179.089	176.091	177.933	173.902	170.638	169.45	167.491	169.221	170.909	168.109	164.54	166.426	162.754	159.397	160.516	162.208	160.023	156.534	147.078
195.508	193.001	190.478	191.297	188.788	187.47	184.027	180.768	182.311	178.972	175.955	177.707	179.668	176.665	178.502	174.468	171.199	170.001	168.047	169.773	171.457	168.651	165.078	166.959	163.284	159.922	161.038	162.726	160.533	157.041	147.557
196.151	193.636	191.108	191.924	189.408	188.081	184.634	181.37	182.909	179.565	176.543	178.291	180.246	177.238	179.07	175.034	171.76	170.553	168.604	170.325	172.004	169.192	165.616	167.492	163.813	160.447	161.56	163.244	161.043	157.547	148.035
196.793	194.272	191.737	192.551	190.029	188.692	185.241	181.972	183.507	180.159	177.132	178.875	180.825	177.811	179.639	175.6	172.322	171.104	169.16	170.877	172.552	169.734	166.154	168.025	164.343	160.972	162.083	163.761	161.554	158.053	148.514
197.435	194.908	192.366	193.178	190.649	189.303	185.848	182.574	184.105	180.753	177.72	179.459	181.403	178.384	180.207	176.166	172.883	171.655	169.717	171.429	173.099	170.276	166.692	168.558	164.872	161.497	162.605	164.279	162.064	158.56	148.993
198.078	195.544	192.995	193.805	191.27	189.913	186.454	183.176	184.703	181.346	178.308	180.042	181.982	178.958	180.775	176.732	173.444	172.207	170.273	171.981	173.646	170.817	167.23	169.091	165.401	162.022	163.127	164.797	162.574	159.066	149.471
198.72	196.179	193.624	194.432	191.89	190.524	187.061	183.778	185.301	181.94	178.897	180.626	182.56	179.531	181.344	177.298	174.006	172.758	170.829	172.533	174.194	171.359	167.768	169.624	165.931	162.547	163.649	165.314	163.085	159.572	149.95
199.362	196.815	194.253	195.059	192.51	191.135	187.667	184.38	185.899	182.533	179.485	181.209	183.139	180.104	181.912	177.863	174.567	173.309	171.386	173.084	174.741	171.9	168.305	170.156	166.46	163.072	164.171	165.832	163.595	160.078	150.428
200.004	197.45	194.882	195.686	193.131	191.745	188.273	184.982	186.496	183.126	180.073	181.793	183.717	180.677	182.48	178.429	175.128	173.86	171.942	173.636	175.288	172.442	168.843	170.689	166.989	163.597	164.693	166.349	164.105	160.585	150.907
200.646	198.086	195.511	196.312	193.751	192.355	188.88	185.584	187.094	183.72	180.661	182.376	184.295	181.25	183.048	178.994	175.689	174.411	172.498	174.187	175.835	172.983	169.38	171.222	167.518	164.122	165.215	166.867	164.615	161.091	151.385
201.288	198.721	196.14	196.939	194.371	192.966	189.486	186.185	187.692	184.313	181.249	182.96	184.873	181.823	183.616	179.56	176.25	174.962	173.054	174.739	176.383	173.524	169.918	171.754	168.047	164.647	165.737	167.384	165.125	161.597	151.863
201.93	199.356	196.769	197.566	194.991	193.576	190.092	186.787	188.289	184.906	181.837	183.543	185.451	182.396	184.184	180.125	176.811	175.513	173.61	175.29	176.93	174.066	170.456	172.287	168.577	165.172	166.259	167.902	165.635	162.103	152.342
202.572	199.992	197.397	198.192	195.611	194.186	190.698	187.388	188.887	185.499	182.425	184.126	186.03	182.969	184.752	180.691	177.371	176.064	174.166	175.842	177.477	174.607	170.993	172.819	169.106	165.696	166.78	168.419	166.145	162.609	152.82
203.213	200.627	198.026	198.819	196.231	194.797	191.304	187.99	189.484	186.092	183.012	184.709	186.608	183.541	185.32	181.256	177.932	176.614	174.722	176.393	178.024	175.148	171.53	173.352	169.635	166.221	167.302	168.936	166.655	163.115	153.298
203.855	201.262	198.654	199.445	196.851	195.407	191.91	188.591	190.081	186.685	183.6	185.293	187.186	184.114	185.888	181.822	178.493	177.165	175.278	176.945	178.57	175.689	172.068	173.884	170.163	166.746	167.824	169.453	167.164	163.62	153.776
204.497	201.897	199.283	200.071	197.47	196.017	192.516	189.193	190.679	187.278	184.188	185.876	187.763	184.687	186.456	182.387	179.054	177.716	175.834	177.496	179.117	176.23	172.605	174.417	170.692	167.27	168.345	169.971	167.674	164.126	154.254
205.138	202.532	199.911	200.698	198.09	196.627	193.122	189.794	191.276	187.871	184.776	186.459	188.341	185.259	187.024	182.952	179.614	178.266	176.39	178.047	179.664	176.771	173.142	174.949	171.221	167.795	168.867	170.488	168.184	164.632	154.733
205.78	203.167	200.54	201.324	198.71	197.237	193.728	190.395	191.873	188.464	185.363	187.042	188.919	185.832	187.591	183.517	180.175	178.817	176.945	178.598	180.211	177.312	173.68	175.481	171.75	168.319	169.388	171.005	168.694	165.138	155.211
206.421	203.802	201.168	201.95	199.329	197.847	194.334	190.997	192.47	189.056	185.951	187.624	189.497	186.404	188.159	184.082	180.735	179.367	177.501	179.149	180.757	177.853	174.217	176.013	172.279	168.844	169.91	171.522	169.203	165.643	155.689
207.062	204.436	201.796	202.576	199.949	198.456	194.94	191.598	193.067	189.649	186.538	188.207	190.074	186.977	188.727	184.647	181.296	179.918	178.057	179.7	181.304	178.394	174.754	176.545	172.807	169.368	170.431	172.039	169.713	166.149	156.167
207.704	205.071	202.425	203.202	200.568	199.066	195.545	192.199	193.664	190.242	187.125	188.79	190.652	187.549	189.294	185.212	181.856	180.468	178.612	180.252	181.851	178.935	175.291	177.078	173.336	169.892	170.953	172.556	170.222	166.655	156.644
208.345	205.706	203.053	203.828	201.188	199.676	196.151	192.8	194.261	190.834	187.713	189.373	191.23	188.121	189.862	185.777	182.417	181.019	179.168	180.802	182.397	179.475	175.828	177.61	173.864	170.416	171.474	173.072	170.732	167.16	157.122
208.986	206.34	203.681	204.454	201.807	200.286	196.756	193.401	194.858	191.427	188.3	189.955	191.807	188.694	190.429	186.342	182.977	181.569	179.723	181.353	182.944	180.016	176.365	178.142	174.393	170.941	171.995	173.589	171.241	167.666	157.6
209.627	206.975	204.309	205.08	202.426	200.895	197.362	194.002	195.455	192.019	188.887	190.538	192.385	189.266	190.996	186.907	183.537	182.119	180.278	181.904	183.49	180.557	176.902	178.674	174.921	171.465	172.516	174.106	171.751	168.171	158.078
210.268	207.609	204.937	205.706	203.046	201.505	197.967	194.602	196.052	192.612	189.475	191.121	192.962	189.838	191.564	187.472	184.098	182.669	180.834	182.455	184.036	181.097	177.438	179.205	175.45	171.989	173.037	174.623	172.26	168.676	158.556
210.909	208.244	205.565	206.331	203.665	202.114	198.573	195.203	196.648	193.204	190.062	191.703	193.539	190.41	192.131	188.036	184.658	183.22	181.389	183.006	184.583	181.638	177.975	179.737	175.978	172.513	173.559	175.139	172.769	169.182	159.033
211.55	208.878	206.192	206.957	204.284	202.723	199.178	195.804	197.245	193.796	190.649	192.286	194.117	190.982	192.698	188.601	185.218	183.77	181.944	183.556	185.129	182.178	178.512	180.269	176.506	173.037	174.08	175.656	173.279	169.687	159.511
212.191	209.512	206.82	207.583	204.903	203.333	199.783	196.405	197.842	194.388	191.236	192.868	194.694	191.554	193.265	189.166	185.778	184.32	182.5	184.107	185.675	182.719	179.049	180.801	177.035	173.561	174.601	176.173	173.788	170.192	159.989
212.832	210.147	207.448	208.208	205.522	203.942	200.388	197.005	198.438	194.981	191.823	193.45	195.271	192.126	193.832	189.73	186.338	184.87	183.055	184.658	186.221	183.259	179.585	181.333	177.563	174.085	175.122	176.689	174.297	170.697	160.466
213.472	210.781	208.075	208.834	206.141	204.551	200.993	197.606	199.035	195.573	192.41	194.033	195.848	192.698	194.399	190.295	186.898	185.42	183.61	185.208	186.768	183.8	180.122	181.864	178.091	174.609	175.643	177.206	174.806	171.202	160.944
214.113	211.415	208.703	209.459	206.76	205.16	201.598	198.206	199.631	196.165	192.996	194.615	196.425	193.27	194.966	190.859	187.458	185.969	184.165	185.759	187.314	184.34	180.658	182.396	178.619	175.132	176.163	177.722	175.315	171.708	161.421
214.754	212.049	209.331	210.084	207.378	205.77	202.203	198.807	200.227	196.757	193.583	195.197	197.002	193.841	195.533	191.423	188.017	186.519	184.72	186.309	187.86	184.88	181.195	182.927	179.147	175.656	176.684	178.238	175.824	172.213	161.898
215.394	212.683	209.958	210.71	207.997	206.379	202.808	199.407	200.824	197.349	194.17	195.779	197.579	194.413	196.1	191.988	188.577	187.069	185.275	186.859	188.405	185.42	181.731	183.459	179.675	176.18	177.205	178.755	176.333	172.718	162.376
216.035	213.317	210.585	211.335	208.616	206.988	203.413	200.007	201.42	197.94	194.756	196.361	198.156	194.985	196.667	192.552	189.137	187.619	185.829	187.41	188.951	185.96	182.268	183.99	180.203	176.703	177.726	179.271	176.842	173.223	162.853
216.675	213.951	211.213	211.96	209.234	207.596	204.018	200.607	202.016	198.532	195.343	196.943	198.733	195.556	197.234	193.116	189.697	188.168	186.384	187.96	189.497	186.5	182.804	184.522	180.731	177.227	178.246	179.787	177.351	173.727	163.33
217.315	214.584	211.84	212.585	209.853	208.205	204.623	201.208	202.612	199.124	195.93	197.525	199.31	196.128	197.8	193.68	190.256	188.718	186.939	188.51	190.043	187.04	183.34	185.053	181.259	177.751	178.767	180.303	177.86	174.232	163.808
217.956	215.218	212.467	213.21	210.471	208.814	205.228	201.808	203.208	199.716	196.516	198.107	199.886	196.699	198.367	194.244	190.816	189.268	187.494	189.06	190.589	187.58	183.877	185.584	181.787	178.274	179.287	180.82	178.368	174.737	164.285
218.596	215.852	213.094	213.835	211.09	209.423	205.832	202.408	203.804	200.307	197.102	198.689	200.463	197.271	198.933	194.808	191.375	189.817	188.048	189.611	191.134	188.12	184.413	186.115	182.314	178.798	179.808	181.336	178.877	175.242	164.762
219.236	216.485	213.721	214.46	211.708	210.031	206.437	203.008	204.4	200.899	197.689	199.27	201.04	197.842	199.5	195.372	191.935	190.367	188.603	190.161	191.68	188.66	184.949	186.647	182.842	179.321	180.328	181.852	179.386	175.747	165.239
219.876	217.119	214.348	215.085	212.326	210.64	207.041	203.608	204.996	201.49	198.275	199.852	201.616	198.413	200.066	195.936	192.494	190.916	189.157	190.711	192.226	189.2	185.485	187.178	183.37	179.844	180.849	182.368	179.894	176.251	165.716
220.516	217.752	214.975	215.709	212.945	211.249	207.646	204.208	205.592	202.082	198.861	200.434	202.193	198.984	200.633	196.5	193.053	191.465	189.712	191.26	192.771	189.74	186.021	187.709	183.897	180.368	181.369	182.884	180.403	176.756	166.193
221.156	218.386	215.602	216.334	213.563	211.857	208.25	204.807	206.188	202.673	199.448	201.015	202.769	199.556	201.199	197.064	193.613	192.015	190.266	191.81	193.317	190.279	186.557	188.24	184.425	180.891	181.89	183.399	180.911	177.26	166.67
221.796	219.019	216.229	216.959	214.181	212.466	208.854	205.407	206.783	203.265	200.034	201.597	203.345	200.127	201.766	197.628	194.172	192.564	190.821	192.36	193.862	190.819	187.093	188.771	184.952	181.414	182.41	183.915	181.42	177.765	167.147
222.436	219.652	216.855	217.583	214.799	213.074	209.459	206.007	207.379	203.856	200.62	202.178	203.922	200.698	202.332	198.192	194.731	193.113	191.375	192.91	194.407	191.359	187.629	189.302	185.48	181.937	182.93	184.431	181.928	178.269	167.624
223.075	220.285	217.482	218.208	215.417	213.682	210.063	206.606	207.975	204.447	201.206	202.76	204.498	201.269	202.898	198.755	195.29	193.662	191.929	193.46	194.953	191.898	188.164	189.832	186.007	182.46	183.45	184.947	182.437	178.774	168.101
223.715	220.918	218.109	218.832	216.035	214.29	210.667	207.206	208.57	205.038	201.792	203.341	205.074	201.84	203.464	199.319	195.849	194.211	192.483	194.009	195.498	192.438	188.7	190.363	186.535	182.983	183.97	185.463	182.945	179.278	168.578
224.355	221.551	218.735	219.457	216.653	214.899	211.271	207.805	209.166	205.629	202.378	203.922	205.65	202.411	204.03	199.882	196.408	194.76	193.038	194.559	196.043	192.977	189.236	190.894	187.062	183.506	184.49	185.978	183.453	179.782	169.054
224.994	222.184	219.362	220.081	217.27	215.507	211.875	208.405	209.761	206.22	202.963	204.504	206.226	202.982	204.596	200.446	196.967	195.309	193.592	195.109	196.588	193.517	189.771	191.425	187.589	184.029	185.01	186.494	183.961	180.287	169.531
225.634	222.817	219.988	220.705	217.888	216.115	212.479	209.004	210.356	206.811	203.549	205.085	206.802	203.552	205.162	201.009	197.526	195.858	194.146	195.658	197.133	194.056	190.307	191.955	188.116	184.552	185.53	187.009	184.47	180.791	170.008
226.273	223.45	220.615	221.33	218.506	216.723	213.083	209.604	210.952	207.402	204.135	205.666	207.378	204.123	205.728	201.573	198.085	196.407	194.7	196.207	197.678	194.595	190.843	192.486	188.643	185.075	186.05	187.525	184.978	181.295	170.484
226.912	224.083	221.241	221.954	219.123	217.331	213.687	210.203	211.547	207.993	204.721	206.247	207.954	204.694	206.294	202.136	198.644	196.956	195.254	196.757	198.223	195.134	191.378	193.017	189.17	185.598	186.57	188.04	185.486	181.799	170.961
227.552	224.716	221.867	222.578	219.741	217.938	214.291	210.802	212.142	208.584	205.306	206.828	208.53	205.264	206.86	202.699	199.202	197.504	195.807	197.306	198.768	195.674	191.913	193.547	189.697	186.12	187.09	188.556	185.994	182.303	171.437
228.191	225.348	222.493	223.202	220.358	218.546	214.894	211.401	212.737	209.175	205.892	207.409	209.106	205.835	207.425	203.262	199.761	198.053	196.361	197.856	199.313	196.213	192.449	194.077	190.224	186.643	187.61	189.071	186.502	182.807	171.914
228.83	225.981	223.119	223.826	220.976	219.154	215.498	212	213.332	209.765	206.477	207.99	209.682	206.405	207.991	203.825	200.32	198.602	196.915	198.405	199.858	196.752	192.984	194.608	190.751	187.166	188.129	189.586	187.01	183.311	172.39
229.469	226.613	223.745	224.45	221.593	219.762	216.102	212.599	213.927	210.356	207.063	208.571	210.257	206.976	208.557	204.389	200.878	199.15	197.469	198.954	200.403	197.291	193.519	195.138	191.278	187.688	188.649	190.101	187.518	183.815	172.867
230.108	227.246	224.371	225.073	222.21	220.369	216.705	213.198	214.522	210.947	207.648	209.151	210.833	207.546	209.122	204.952	201.437	199.699	198.022	199.503	200.947	197.83	194.055	195.669	191.805	188.211	189.169	190.617	188.025	184.319	173.343
230.747	227.878	224.997	225.697	222.827	220.977	217.309	213.797	215.117	211.537	208.233	209.732	211.409	208.117	209.688	205.515	201.995	200.247	198.576	200.052	201.492	198.369	194.59	196.199	192.332	188.733	189.688	191.132	188.533	184.823	173.819
231.386	228.511	225.623	226.321	223.445	221.584	217.912	214.396	215.712	212.127	208.818	210.313	211.984	208.687	210.253	206.078	202.553	200.796	199.13	200.601	202.037	198.907	195.125	196.729	192.858	189.256	190.208	191.647	189.041	185.327	174.295
232.025	229.143	226.249	226.944	224.062	222.192	218.515	214.995	216.306	212.718	209.404	210.893	212.56	209.257	210.819	206.64	203.112	201.344	199.683	201.15	202.581	199.446	195.66	197.259	193.385	189.778	190.727	192.162	189.549	185.83	174.772
232.663	229.775	226.874	227.568	224.679	222.799	219.119	215.594	216.901	213.308	209.989	211.474	213.135	209.827	211.384	207.203	203.67	201.892	200.236	201.699	203.126	199.985	196.195	197.789	193.912	190.3	191.246	192.677	190.056	186.334	175.248
233.302	230.407	227.5	228.191	225.296	223.406	219.722	216.192	217.496	213.898	210.574	212.054	213.71	210.397	211.949	207.766	204.228	202.441	200.79	202.248	203.67	200.524	196.73	198.319	194.438	190.823	191.766	193.192	190.564	186.838	175.724
233.941	231.039	228.126	228.815	225.913	224.014	220.325	216.791	218.09	214.489	211.159	212.635	214.286	210.967	212.514	208.329	204.786	202.989	201.343	202.797	204.215	201.062	197.265	198.849	194.965	191.345	192.285	193.707	191.071	187.341	176.2
234.579	231.671	228.751	229.438	226.529	224.621	220.928	217.389	218.685	215.079	211.744	213.215	214.861	211.537	213.08	208.891	205.344	203.537	201.896	203.345	204.759	201.601	197.8	199.379	195.491	191.867	192.804	194.221	191.579	187.845	176.676
235.218	232.303	229.377	230.062	227.146	225.228	221.531	217.988	219.279	215.669	212.329	213.795	215.436	212.107	213.645	209.454	205.903	204.085	202.45	203.894	205.303	202.139	198.334	199.909	196.018	192.389	193.323	194.736	192.086	188.348	177.152
235.856	232.935	230.002	230.685	227.763	225.835	222.134	218.586	219.873	216.259	212.913	214.376	216.011	212.677	214.21	210.016	206.461	204.633	203.003	204.443	205.847	202.678	198.869	200.439	196.544	192.911	193.843	195.251	192.594	188.852	177.628
236.494	233.567	230.627	231.308	228.38	226.442	222.737	219.185	220.468	216.849	213.498	214.956	216.586	213.247	214.775	210.579	207.018	205.181	203.556	204.991	206.392	203.216	199.404	200.969	197.07	193.433	194.362	195.766	193.101	189.355	178.104
237.133	234.199	231.253	231.931	228.996	227.049	223.34	219.783	221.062	217.439	214.083	215.536	217.161	213.817	215.34	211.141	207.576	205.729	204.109	205.54	206.936	203.755	199.939	201.498	197.597	193.955	194.881	196.28	193.608	189.858	178.579
237.771	234.83	231.878	232.554	229.613	227.656	223.943	220.381	221.656	218.029	214.668	216.116	217.736	214.386	215.905	211.704	208.134	206.277	204.662	206.088	207.48	204.293	200.473	202.028	198.123	194.477	195.4	196.795	194.115	190.362	179.055
238.409	235.462	232.503	233.177	230.229	228.263	224.545	220.979	222.25	218.618	215.252	216.696	218.311	214.956	216.469	212.266	208.692	206.825	205.215	206.637	208.024	204.831	201.008	202.557	198.649	194.999	195.919	197.309	194.623	190.865	179.531
239.047	236.093	233.128	233.8	230.845	228.869	225.148	221.577	222.844	219.208	215.837	217.276	218.886	215.526	217.034	212.828	209.25	207.372	205.768	207.185	208.568	205.37	201.542	203.087	199.175	195.521	196.438	197.824	195.13	191.368	180.007
239.685	236.725	233.753	234.423	231.462	229.476	225.751	222.175	223.438	219.798	216.421	217.856	219.46	216.095	217.599	213.39	209.807	207.92	206.32	207.733	209.112	205.908	202.077	203.617	199.701	196.042	196.956	198.338	195.637	191.871	180.482
240.323	237.356	234.378	235.046	232.078	230.083	226.353	222.773	224.032	220.387	217.006	218.435	220.035	216.665	218.164	213.952	210.365	208.468	206.873	208.282	209.655	206.446	202.611	204.146	200.227	196.564	197.475	198.852	196.144	192.374	180.958
240.961	237.988	235.003	235.668	232.694	230.689	226.956	223.371	224.626	220.977	217.59	219.015	220.61	217.234	218.728	214.515	210.922	209.015	207.426	208.83	210.199	206.984	203.145	204.675	200.753	197.086	197.994	199.367	196.651	192.877	181.433
241.599	238.619	235.627	236.291	233.31	231.296	227.558	223.969	225.22	221.566	218.174	219.595	221.184	217.803	219.293	215.077	211.48	209.563	207.979	209.378	210.743	207.522	203.68	205.205	201.279	197.607	198.513	199.881	197.158	193.38	181.909
242.236	239.25	236.252	236.914	233.926	231.902	228.16	224.567	225.814	222.156	218.758	220.175	221.759	218.373	219.857	215.638	212.037	210.11	208.531	209.926	211.287	208.06	204.214	205.734	201.805	198.129	199.031	200.395	197.665	193.883	182.384
242.874	239.881	236.877	237.536	234.542	232.508	228.763	225.165	226.407	222.745	219.343	220.754	222.333	218.942	220.422	216.2	212.595	210.658	209.084	210.474	211.83	208.598	204.748	206.263	202.33	198.65	199.55	200.909	198.171	194.386	182.86
243.512	240.512	237.501	238.159	235.158	233.115	229.365	225.762	227.001	223.334	219.927	221.334	222.908	219.511	220.986	216.762	213.152	211.205	209.636	211.022	212.374	209.136	205.282	206.792	202.856	199.172	200.068	201.424	198.678	194.889	183.335
244.149	241.143	238.126	238.781	235.774	233.721	229.967	226.36	227.595	223.924	220.511	221.913	223.482	220.08	221.55	217.324	213.709	211.753	210.189	211.57	212.917	209.673	205.816	207.322	203.382	199.693	200.587	201.938	199.185	195.392	183.81
244.787	241.774	238.75	239.403	236.39	234.327	230.569	226.958	228.188	224.513	221.095	222.493	224.056	220.649	222.115	217.886	214.266	212.3	210.741	212.118	213.461	210.211	206.35	207.851	203.907	200.215	201.105	202.452	199.692	195.894	184.286
245.424	242.405	239.375	240.026	237.006	234.933	231.171	227.555	228.782	225.102	221.679	223.072	224.63	221.218	222.679	218.447	214.824	212.847	211.293	212.666	214.004	210.749	206.884	208.38	204.433	200.736	201.624	202.966	200.198	196.397	184.761
246.061	243.036	239.999	240.648	237.621	235.539	231.773	228.152	229.375	225.691	222.262	223.651	225.205	221.787	223.243	219.009	215.381	213.394	211.846	213.213	214.548	211.286	207.418	208.909	204.959	201.257	202.142	203.48	200.705	196.9	185.236
246.699	243.667	240.623	241.27	238.237	236.145	232.375	228.75	229.968	226.28	222.846	224.23	225.779	222.356	223.807	219.571	215.938	213.941	212.398	213.761	215.091	211.824	207.952	209.438	205.484	201.778	202.66	203.993	201.211	197.402	185.711
247.336	244.298	241.248	241.892	238.853	236.751	232.977	229.347	230.562	226.869	223.43	224.81	226.353	222.925	224.371	220.132	216.495	214.488	212.95	214.309	215.634	212.361	208.485	209.966	206.009	202.299	203.178	204.507	201.718	197.905	186.186
247.973	244.928	241.872	242.514	239.468	237.357	233.579	229.944	231.155	227.458	224.014	225.389	226.927	223.494	224.935	220.694	217.052	215.035	213.502	214.856	216.177	212.899	209.019	210.495	206.535	202.821	203.697	205.021	202.224	198.407	186.661
248.61	245.559	242.496	243.136	240.084	237.963	234.18	230.542	231.748	228.047	224.597	225.968	227.501	224.062	225.499	221.255	217.609	215.582	214.054	215.404	216.72	213.436	209.553	211.024	207.06	203.342	204.215	205.535	202.731	198.91	187.136
249.247	246.189	243.12	243.758	240.699	238.569	234.782	231.139	232.341	228.635	225.181	226.547	228.075	224.631	226.063	221.816	218.165	216.129	214.606	215.951	217.264	213.974	210.087	211.553	207.585	203.863	204.733	206.048	203.237	199.412	187.611
249.884	246.82	243.744	244.38	241.314	239.174	235.384	231.736	232.934	229.224	225.764	227.126	228.648	225.2	226.627	222.378	218.722	216.676	215.158	216.499	217.807	214.511	210.62	212.081	208.111	204.383	205.251	206.562	203.743	199.915	188.086
250.521	247.45	244.368	245.001	241.929	239.78	235.985	232.333	233.527	229.813	226.348	227.705	229.222	225.768	227.19	222.939	219.279	217.223	215.71	217.046	218.349	215.048	211.154	212.61	208.636	204.904	205.769	207.075	204.249	200.417	188.561
251.158	248.08	244.992	245.623	242.545	240.386	236.587	232.93	234.12	230.401	226.931	228.283	229.796	226.337	227.754	223.5	219.835	217.769	216.262	217.593	218.892	215.585	211.687	213.139	209.161	205.425	206.287	207.589	204.756	200.919	189.036
251.794	248.71	245.615	246.245	243.16	240.991	237.188	233.527	234.713	230.99	227.515	228.862	230.369	226.905	228.318	224.061	220.392	218.316	216.813	218.141	219.435	216.122	212.22	213.667	209.686	205.946	206.804	208.102	205.262	201.421	189.511
252.431	249.341	246.239	246.866	243.775	241.596	237.79	234.123	235.306	231.578	228.098	229.441	230.943	227.473	228.881	224.622	220.949	218.863	217.365	218.688	219.978	216.66	212.754	214.196	210.211	206.467	207.322	208.616	205.768	201.923	189.985
253.068	249.971	246.863	247.488	244.39	242.202	238.391	234.72	235.898	232.167	228.681	230.019	231.517	228.042	229.445	225.183	221.505	219.409	217.917	219.235	220.521	217.197	213.287	214.724	210.736	206.987	207.84	209.129	206.274	202.426	190.46
253.704	250.601	247.486	248.109	245.005	242.807	238.992	235.317	236.491	232.755	229.264	230.598	232.09	228.61	230.008	225.744	222.061	219.956	218.468	219.782	221.064	217.734	213.82	215.252	211.261	207.508	208.358	209.642	206.78	202.928	190.935
254.341	251.231	248.11	248.73	245.619	243.412	239.593	235.913	237.084	233.343	229.847	231.177	232.663	229.178	230.572	226.305	222.618	220.502	219.02	220.329	221.606	218.27	214.354	215.781	211.785	208.028	208.875	210.156	207.286	203.43	191.409
254.977	251.861	248.733	249.352	246.234	244.017	240.194	236.51	237.676	233.931	230.43	231.755	233.237	229.746	231.135	226.866	223.174	221.049	219.571	220.876	222.149	218.807	214.887	216.309	212.31	208.549	209.393	210.669	207.792	203.932	191.884
255.613	252.49	249.356	249.973	246.849	244.623	240.795	237.106	238.269	234.519	231.013	232.333	233.81	230.314	231.698	227.426	223.73	221.595	220.123	221.423	222.691	219.344	215.42	216.837	212.835	209.069	209.91	211.182	208.297	204.433	192.358
256.25	253.12	249.98	250.594	247.464	245.228	241.396	237.703	238.861	235.108	231.596	232.912	234.383	230.882	232.261	227.987	224.286	222.141	220.674	221.97	223.234	219.881	215.953	217.365	213.36	209.59	210.428	211.695	208.803	204.935	192.833
256.886	253.75	250.603	251.215	248.078	245.833	241.997	238.299	239.453	235.696	232.179	233.49	234.956	231.45	232.825	228.548	224.843	222.687	221.225	222.517	223.776	220.418	216.486	217.893	213.884	210.11	210.945	212.208	209.309	205.437	193.307
257.522	254.379	251.226	251.836	248.693	246.438	242.598	238.896	240.046	236.284	232.762	234.068	235.529	232.018	233.388	229.108	225.399	223.234	221.777	223.063	224.319	220.954	217.019	218.421	214.409	210.63	211.463	212.721	209.815	205.939	193.781
258.158	255.009	251.849	252.457	249.307	247.042	243.199	239.492	240.638	236.871	233.345	234.646	236.103	232.586	233.951	229.669	225.955	223.78	222.328	223.61	224.861	221.491	217.552	218.949	214.933	211.151	211.98	213.234	210.32	206.44	194.256
258.794	255.639	252.472	253.078	249.922	247.647	243.8	240.088	241.23	237.459	233.927	235.224	236.676	233.154	234.514	230.229	226.511	224.326	222.879	224.157	225.403	222.027	218.084	219.477	215.458	211.671	212.497	213.747	210.826	206.942	194.73
259.43	256.268	253.095	253.699	250.536	248.252	244.4	240.684	241.822	238.047	234.51	235.802	237.248	233.721	235.077	230.79	227.067	224.872	223.43	224.703	225.945	222.564	218.617	220.005	215.982	212.191	213.015	214.26	211.331	207.444	195.204
260.066	256.897	253.718	254.32	251.15	248.857	245.001	241.28	242.414	238.635	235.092	236.38	237.821	234.289	235.64	231.35	227.622	225.418	223.981	225.25	226.487	223.1	219.15	220.533	216.507	212.711	213.532	214.773	211.837	207.945	195.678
260.702	257.527	254.341	254.94	251.764	249.461	245.601	241.876	243.006	239.222	235.675	236.958	238.394	234.857	236.202	231.91	228.178	225.963	224.532	225.796	227.03	223.637	219.682	221.06	217.031	213.231	214.049	215.285	212.342	208.447	196.152
261.337	258.156	254.964	255.561	252.379	250.066	246.202	242.472	243.598	239.81	236.257	237.536	238.967	235.424	236.765	232.471	228.734	226.509	225.083	226.343	227.572	224.173	220.215	221.588	217.555	213.751	214.566	215.798	212.847	208.948	196.626
261.973	258.785	255.586	256.181	252.993	250.67	246.802	243.068	244.19	240.398	236.84	238.114	239.54	235.992	237.328	233.031	229.29	227.055	225.634	226.889	228.114	224.709	220.748	222.116	218.079	214.271	215.083	216.311	213.353	209.45	197.1
262.609	259.414	256.209	256.802	253.607	251.275	247.403	243.664	244.782	240.985	237.422	238.692	240.112	236.559	237.89	233.591	229.845	227.601	226.185	227.435	228.655	225.245	221.28	222.643	218.603	214.791	215.6	216.823	213.858	209.951	197.574
263.244	260.043	256.832	257.422	254.221	251.879	248.003	244.26	245.374	241.572	238.004	239.269	240.685	237.127	238.453	234.151	230.401	228.146	226.735	227.982	229.197	225.782	221.813	223.171	219.128	215.311	216.117	217.336	214.363	210.452	198.048
263.879	260.672	257.454	258.043	254.834	252.483	248.603	244.855	245.965	242.16	238.586	239.847	241.257	237.694	239.016	234.711	230.956	228.692	227.286	228.528	229.739	226.318	222.345	223.698	219.652	215.83	216.634	217.848	214.868	210.953	198.522
264.515	261.301	258.076	258.663	255.448	253.087	249.203	245.451	246.557	242.747	239.169	240.425	241.83	238.261	239.578	235.271	231.512	229.238	227.837	229.074	230.281	226.854	222.877	224.226	220.176	216.35	217.151	218.361	215.374	211.455	198.996
265.15	261.93	258.699	259.283	256.062	253.692	249.803	246.047	247.148	243.334	239.751	241.002	242.402	238.828	240.14	235.831	232.067	229.783	228.387	229.62	230.823	227.39	223.41	224.753	220.699	216.87	217.667	218.873	215.879	211.956	199.47
265.785	262.558	259.321	259.903	256.676	254.296	250.404	246.642	247.74	243.921	240.333	241.58	242.974	239.395	240.703	236.391	232.622	230.329	228.938	230.166	231.364	227.926	223.942	225.281	221.223	217.389	218.184	219.385	216.384	212.457	199.944
266.421	263.187	259.943	260.524	257.289	254.9	251.003	247.237	248.331	244.509	240.915	242.157	243.547	239.963	241.265	236.95	233.178	230.874	229.488	230.712	231.906	228.462	224.474	225.808	221.747	217.909	218.701	219.898	216.889	212.958	200.417
267.056	263.816	260.566	261.144	257.903	255.504	251.603	247.833	248.923	245.096	241.496	242.734	244.119	240.53	241.827	237.51	233.733	231.419	230.039	231.258	232.447	228.997	225.006	226.335	222.271	218.429	219.217	220.41	217.394	213.459	200.891
267.691	264.444	261.188	261.764	258.516	256.108	252.203	248.428	249.514	245.683	242.078	243.311	244.691	241.097	242.389	238.07	234.288	231.964	230.589	231.804	232.989	229.533	225.538	226.862	222.795	218.948	219.734	220.922	217.898	213.96	201.364
268.326	265.073	261.81	262.383	259.13	256.711	252.803	249.023	250.105	246.269	242.66	243.889	245.263	241.663	242.952	238.629	234.843	232.51	231.139	232.35	233.53	230.069	226.07	227.389	223.318	219.467	220.25	221.434	218.403	214.461	201.838
268.961	265.701	262.432	263.003	259.743	257.315	253.403	249.619	250.696	246.856	243.242	244.466	245.835	242.23	243.514	239.189	235.398	233.055	231.69	232.895	234.072	230.604	226.602	227.916	223.842	219.987	220.767	221.946	218.908	214.962	202.311
269.595	266.33	263.054	263.623	260.356	257.919	254.002	250.214	251.287	247.443	243.823	245.043	246.407	242.797	244.076	239.748	235.953	233.6	232.24	233.441	234.613	231.14	227.134	228.443	224.365	220.506	221.283	222.458	219.413	215.462	202.785
270.23	266.958	263.675	264.243	260.97	258.523	254.602	250.809	251.878	248.03	244.405	245.62	246.979	243.364	244.638	240.308	236.508	234.145	232.79	233.987	235.154	231.676	227.666	228.97	224.889	221.025	221.8	222.97	219.917	215.963	203.258
270.865	267.586	264.297	264.862	261.583	259.126	255.202	251.404	252.469	248.616	244.986	246.197	247.551	243.93	245.199	240.867	237.063	234.69	233.34	234.532	235.695	232.211	228.198	229.497	225.412	221.544	222.316	223.482	220.422	216.464	203.732
271.5	268.214	264.919	265.482	262.196	259.73	255.801	251.999	253.06	249.203	245.568	246.774	248.123	244.497	245.761	241.427	237.618	235.235	233.89	235.078	236.237	232.747	228.729	230.024	225.936	222.064	222.832	223.994	220.926	216.964	204.205
272.134	268.842	265.54	266.101	262.809	260.333	256.4	252.594	253.651	249.79	246.149	247.351	248.694	245.064	246.323	241.986	238.173	235.78	234.44	235.623	236.778	233.282	229.261	230.551	226.459	222.583	223.348	224.506	221.431	217.465	204.678
272.769	269.47	266.162	266.721	263.422	260.936	257	253.188	254.242	250.376	246.731	247.927	249.266	245.63	246.885	242.545	238.727	236.325	234.99	236.169	237.319	233.817	229.793	231.078	226.982	223.102	223.864	225.017	221.935	217.966	205.151
273.403	270.098	266.784	267.34	264.035	261.54	257.599	253.783	254.833	250.963	247.312	248.504	249.838	246.196	247.446	243.104	239.282	236.869	235.54	236.714	237.86	234.353	230.324	231.604	227.506	223.621	224.38	225.529	222.44	218.466	205.625
274.037	270.726	267.405	267.96	264.648	262.143	258.198	254.378	255.423	251.549	247.893	249.081	250.409	246.763	248.008	243.663	239.836	237.414	236.089	237.259	238.401	234.888	230.856	232.131	228.029	224.14	224.896	226.041	222.944	218.966	206.098
274.672	271.354	268.026	268.579	265.26	262.746	258.797	254.972	256.014	252.135	248.474	249.657	250.981	247.329	248.57	244.222	240.391	237.959	236.639	237.805	238.941	235.423	231.387	232.657	228.552	224.659	225.412	226.552	223.448	219.467	206.571
275.306	271.982	268.648	269.198	265.873	263.349	259.396	255.567	256.605	252.721	249.055	250.234	251.552	247.895	249.131	244.781	240.945	238.503	237.189	238.35	239.482	235.958	231.919	233.184	229.075	225.177	225.928	227.064	223.953	219.967	207.044
275.94	272.609	269.269	269.817	266.486	263.952	259.995	256.162	257.195	253.308	249.636	250.81	252.124	248.462	249.692	245.34	241.5	239.048	237.738	238.895	240.023	236.493	232.45	233.71	229.598	225.696	226.444	227.575	224.457	220.467	207.517
276.574	273.237	269.89	270.436	267.098	264.555	260.594	256.756	257.786	253.894	250.217	251.387	252.695	249.028	250.254	245.899	242.054	239.592	238.288	239.44	240.564	237.028	232.981	234.237	230.121	226.215	226.96	228.087	224.961	220.968	207.99
277.208	273.865	270.511	271.055	267.711	265.158	261.193	257.35	258.376	254.48	250.798	251.963	253.266	249.594	250.815	246.458	242.609	240.137	238.837	239.985	241.104	237.563	233.512	234.763	230.644	226.733	227.476	228.598	225.465	221.468	208.463
277.842	274.492	271.132	271.674	268.323	265.761	261.792	257.945	258.966	255.066	251.379	252.539	253.837	250.16	251.376	247.017	243.163	240.681	239.387	240.53	241.645	238.098	234.044	235.289	231.167	227.252	227.992	229.109	225.969	221.968	208.935
278.476	275.119	271.753	272.293	268.936	266.364	262.391	258.539	259.556	255.652	251.96	253.116	254.409	250.726	251.938	247.575	243.717	241.225	239.936	241.075	242.185	238.633	234.575	235.816	231.69	227.771	228.507	229.621	226.473	222.468	209.408
279.11	275.747	272.374	272.912	269.548	266.967	262.99	259.133	260.147	256.238	252.54	253.692	254.98	251.292	252.499	248.134	244.271	241.77	240.486	241.62	242.726	239.168	235.106	236.342	232.212	228.289	229.023	230.132	226.977	222.968	209.881
279.744	276.374	272.995	273.53	270.16	267.569	263.588	259.727	260.737	256.823	253.121	254.268	255.551	251.857	253.06	248.692	244.825	242.314	241.035	242.164	243.266	239.702	235.637	236.868	232.735	228.808	229.538	230.643	227.481	223.468	210.354
280.377	277.001	273.616	274.149	270.772	268.172	264.187	260.321	261.327	257.409	253.702	254.844	256.122	252.423	253.621	249.251	245.379	242.858	241.584	242.709	243.807	240.237	236.168	237.394	233.258	229.326	230.054	231.154	227.985	223.968	210.826
281.011	277.628	274.236	274.768	271.384	268.775	264.785	260.915	261.917	257.995	254.282	255.42	256.693	252.989	254.182	249.809	245.933	243.402	242.133	243.254	244.347	240.772	236.699	237.92	233.78	229.844	230.569	231.665	228.489	224.468	211.299
281.644	278.255	274.857	275.386	271.996	269.377	265.384	261.509	262.507	258.58	254.863	255.996	257.263	253.555	254.743	250.368	246.487	243.946	242.682	243.798	244.887	241.306	237.23	238.446	234.303	230.363	231.085	232.176	228.992	224.968	211.771
282.278	278.882	275.478	276.005	272.608	269.98	265.982	262.103	263.097	259.166	255.443	256.572	257.834	254.12	255.303	250.926	247.041	244.49	243.231	244.343	245.427	241.841	237.76	238.972	234.825	230.881	231.6	232.687	229.496	225.467	212.244
282.911	279.509	276.098	276.623	273.22	270.582	266.581	262.697	263.686	259.751	256.023	257.147	258.405	254.686	255.864	251.484	247.595	245.034	243.78	244.888	245.968	242.375	238.291	239.498	235.348	231.399	232.115	233.198	230	225.967	212.716
283.545	280.136	276.719	277.241	273.832	271.184	267.179	263.291	264.276	260.337	256.604	257.723	258.975	255.251	256.425	252.042	248.148	245.578	244.329	245.432	246.508	242.909	238.822	240.024	235.87	231.917	232.631	233.709	230.503	226.467	213.189
284.178	280.763	277.339	277.86	274.444	271.786	267.777	263.884	264.866	260.922	257.184	258.299	259.546	255.817	256.986	252.601	248.702	246.122	244.878	245.976	247.048	243.444	239.352	240.549	236.392	232.435	233.146	234.22	231.007	226.966	213.661
284.811	281.39	277.959	278.478	275.056	272.389	268.375	264.478	265.455	261.508	257.764	258.875	260.117	256.382	257.546	253.159	249.256	246.665	245.427	246.521	247.588	243.978	239.883	241.075	236.915	232.953	233.661	234.731	231.51	227.466	214.134
285.444	282.016	278.579	279.096	275.667	272.991	268.973	265.071	266.045	262.093	258.344	259.45	260.687	256.947	258.107	253.717	249.809	247.209	245.976	247.065	248.128	244.512	240.413	241.601	237.437	233.471	234.176	235.241	232.014	227.966	214.606
286.077	282.643	279.2	279.714	276.279	273.593	269.571	265.665	266.634	262.678	258.924	260.026	261.258	257.513	258.667	254.275	250.363	247.753	246.524	247.609	248.667	245.046	240.944	242.126	237.959	233.989	234.691	235.752	232.517	228.465	215.078
286.71	283.27	279.82	280.332	276.891	274.195	270.169	266.258	267.224	263.263	259.504	260.601	261.828	258.078	259.228	254.833	250.916	248.296	247.073	248.153	249.207	245.581	241.474	242.652	238.481	234.507	235.206	236.263	233.02	228.964	215.55
287.343	283.896	280.44	280.95	277.502	274.797	270.767	266.852	267.813	263.848	260.084	261.176	262.398	258.643	259.788	255.39	251.469	248.84	247.622	248.697	249.747	246.115	242.005	243.177	239.003	235.025	235.721	236.773	233.524	229.464	216.022
287.976	284.522	281.06	281.568	278.113	275.399	271.365	267.445	268.403	264.433	260.664	261.752	262.968	259.208	260.348	255.948	252.023	249.383	248.17	249.241	250.287	246.649	242.535	243.703	239.525	235.543	236.236	237.284	234.027	229.963	216.494
288.609	285.149	281.68	282.185	278.725	276	271.963	268.038	268.992	265.018	261.244	262.327	263.539	259.773	260.908	256.506	252.576	249.927	248.719	249.785	250.826	247.183	243.065	244.228	240.047	236.06	236.751	237.794	234.53	230.462	216.966
289.242	285.775	282.299	282.803	279.336	276.602	272.56	268.631	269.581	265.603	261.824	262.902	264.109	260.338	261.469	257.064	253.129	250.47	249.267	250.329	251.366	247.717	243.595	244.754	240.569	236.578	237.265	238.304	235.033	230.962	217.438
289.874	286.401	282.919	283.421	279.947	277.204	273.158	269.225	270.17	266.188	262.403	263.477	264.679	260.903	262.029	257.621	253.682	251.013	249.815	250.873	251.905	248.25	244.126	245.279	241.091	237.096	237.78	238.815	235.536	231.461	217.91
290.507	287.027	283.539	284.038	280.558	277.805	273.755	269.818	270.759	266.773	262.983	264.052	265.249	261.468	262.589	258.179	254.235	251.556	250.364	251.417	252.445	248.784	244.656	245.804	241.613	237.613	238.295	239.325	236.039	231.96	218.382
291.139	287.653	284.159	284.656	281.169	278.407	274.353	270.411	271.348	267.357	263.562	264.627	265.819	262.032	263.149	258.736	254.788	252.1	250.912	251.961	252.984	249.318	245.186	246.329	242.134	238.131	238.809	239.835	236.542	232.459	218.854
291.772	288.279	284.778	285.273	281.78	279.008	274.95	271.004	271.937	267.942	264.142	265.202	266.389	262.597	263.709	259.294	255.341	252.643	251.46	252.505	253.524	249.852	245.716	246.854	242.656	238.648	239.324	240.345	237.045	232.958	219.326
292.404	288.905	285.398	285.891	282.391	279.61	275.548	271.596	272.526	268.526	264.721	265.777	266.958	263.162	264.269	259.851	255.894	253.186	252.008	253.048	254.063	250.385	246.246	247.379	243.178	239.165	239.838	240.856	237.548	233.457	219.798
293.036	289.531	286.017	286.508	283.002	280.211	276.145	272.189	273.115	269.111	265.301	266.352	267.528	263.726	264.829	260.409	256.447	253.729	252.556	253.592	254.602	250.919	246.775	247.904	243.699	239.683	240.353	241.366	238.051	233.956	220.269
293.669	290.157	286.636	287.125	283.613	280.812	276.742	272.782	273.703	269.695	265.88	266.927	268.098	264.291	265.388	260.966	257	254.272	253.104	254.135	255.141	251.452	247.305	248.429	244.221	240.2	240.867	241.876	238.554	234.455	220.741
294.301	290.783	287.256	287.742	284.224	281.413	277.339	273.375	274.292	270.28	266.459	267.502	268.667	264.855	265.948	261.523	257.553	254.815	253.652	254.679	255.68	251.986	247.835	248.954	244.742	240.717	241.381	242.386	239.056	234.953	221.212
294.933	291.408	287.875	288.36	284.834	282.015	277.937	273.967	274.881	270.864	267.038	268.076	269.237	265.42	266.508	262.08	258.105	255.357	254.2	255.222	256.219	252.519	248.365	249.479	245.264	241.234	241.896	242.896	239.559	235.452	221.684
295.565	292.034	288.494	288.977	285.445	282.616	278.534	274.56	275.469	271.448	267.618	268.651	269.807	265.984	267.067	262.637	258.658	255.9	254.748	255.766	256.758	253.052	248.894	250.004	245.785	241.751	242.41	243.405	240.061	235.951	222.156
296.197	292.659	289.113	289.594	286.055	283.217	279.131	275.152	276.058	272.032	268.197	269.225	270.376	266.548	267.627	263.194	259.21	256.443	255.296	256.309	257.297	253.586	249.424	250.529	246.306	242.269	242.924	243.915	240.564	236.45	222.627
296.829	293.285	289.732	290.21	286.666	283.818	279.727	275.745	276.646	272.617	268.776	269.8	270.945	267.113	268.186	263.751	259.763	256.986	255.843	256.852	257.836	254.119	249.954	251.053	246.828	242.786	243.438	244.425	241.067	236.948	223.098
297.461	293.91	290.351	290.827	287.276	284.418	280.324	276.337	277.235	273.201	269.355	270.374	271.515	267.677	268.746	264.308	260.315	257.528	256.391	257.395	258.375	254.652	250.483	251.578	247.349	243.302	243.952	244.935	241.569	237.447	223.57
298.092	294.535	290.97	291.444	287.887	285.019	280.921	276.929	277.823	273.785	269.933	270.948	272.084	268.241	269.305	264.865	260.868	258.071	256.939	257.939	258.914	255.185	251.012	252.102	247.87	243.819	244.466	245.444	242.071	237.945	224.041
298.724	295.161	291.589	292.061	288.497	285.62	281.518	277.521	278.411	274.369	270.512	271.523	272.653	268.805	269.864	265.422	261.42	258.613	257.486	258.482	259.453	255.718	251.542	252.627	248.391	244.336	244.98	245.954	242.574	238.444	224.512
299.356	295.786	292.208	292.677	289.107	286.221	282.114	278.114	278.999	274.952	271.091	272.097	273.222	269.369	270.424	265.979	261.972	259.156	258.034	259.025	259.991	256.251	252.071	253.151	248.912	244.853	245.494	246.463	243.076	238.942	224.984
299.987	296.411	292.826	293.294	289.717	286.821	282.711	278.706	279.587	275.536	271.67	272.671	273.791	269.933	270.983	266.535	262.525	259.698	258.581	259.568	260.53	256.784	252.6	253.676	249.433	245.37	246.008	246.973	243.578	239.44	225.455
300.619	297.036	293.445	293.911	290.327	287.422	283.308	279.298	280.175	276.12	272.248	273.245	274.36	270.497	271.542	267.092	263.077	260.24	259.128	260.111	261.069	257.317	253.13	254.2	249.954	245.886	246.522	247.482	244.08	239.939	225.926
301.25	297.661	294.064	294.527	290.937	288.022	283.904	279.89	280.763	276.704	272.827	273.819	274.929	271.06	272.101	267.648	263.629	260.783	259.676	260.653	261.607	257.85	253.659	254.724	250.475	246.403	247.036	247.992	244.583	240.437	226.397
301.881	298.286	294.682	295.143	291.547	288.623	284.5	280.482	281.351	277.287	273.405	274.393	275.498	271.624	272.66	268.205	264.181	261.325	260.223	261.196	262.146	258.383	254.188	255.249	250.996	246.92	247.549	248.501	245.085	240.935	226.868
302.513	298.911	295.301	295.76	292.157	289.223	285.097	281.073	281.939	277.871	273.984	274.967	276.067	272.188	273.219	268.761	264.733	261.867	260.77	261.739	262.684	258.915	254.717	255.773	251.516	247.436	248.063	249.01	245.587	241.433	227.339
303.144	299.535	295.919	296.376	292.767	289.823	285.693	281.665	282.527	278.454	274.562	275.541	276.636	272.751	273.778	269.318	265.285	262.409	261.317	262.282	263.222	259.448	255.246	256.297	252.037	247.953	248.576	249.52	246.089	241.931	227.81
303.775	300.16	296.537	296.992	293.377	290.424	286.289	282.257	283.115	279.038	275.14	276.115	277.205	273.315	274.337	269.874	265.837	262.951	261.864	262.824	263.761	259.981	255.775	256.821	252.558	248.469	249.09	250.029	246.591	242.429	228.281
304.406	300.785	297.155	297.608	293.986	291.024	286.885	282.849	283.702	279.621	275.719	276.689	277.773	273.879	274.895	270.43	266.388	263.493	262.411	263.367	264.299	260.513	256.304	257.345	253.078	248.985	249.603	250.538	247.092	242.927	228.751
305.037	301.409	297.774	298.224	294.596	291.624	287.481	283.44	284.29	280.205	276.297	277.262	278.342	274.442	275.454	270.987	266.94	264.035	262.958	263.909	264.837	261.046	256.832	257.869	253.599	249.502	250.117	251.047	247.594	243.425	229.222
305.668	302.034	298.392	298.84	295.206	292.224	288.077	284.032	284.877	280.788	276.875	277.836	278.911	275.005	276.013	271.543	267.492	264.577	263.505	264.452	265.375	261.578	257.361	258.393	254.119	250.018	250.63	251.556	248.096	243.923	229.693
306.299	302.658	299.01	299.456	295.815	292.824	288.673	284.623	285.465	281.371	277.453	278.409	279.479	275.569	276.571	272.099	268.043	265.119	264.052	264.994	265.913	262.111	257.89	258.917	254.64	250.534	251.144	252.065	248.598	244.421	230.164
306.93	303.283	299.628	300.072	296.424	293.424	289.269	285.215	286.052	281.954	278.031	278.983	280.047	276.132	277.13	272.655	268.595	265.66	264.599	265.537	266.451	262.643	258.419	259.44	255.16	251.05	251.657	252.574	249.099	244.919	230.634
307.56	303.907	300.245	300.688	297.034	294.024	289.865	285.806	286.64	282.537	278.609	279.556	280.616	276.695	277.688	273.211	269.146	266.202	265.146	266.079	266.989	263.175	258.947	259.964	255.68	251.566	252.17	253.083	249.601	245.416	231.105
308.191	304.531	300.863	301.303	297.643	294.623	290.461	286.397	287.227	283.12	279.187	280.13	281.184	277.258	278.247	273.767	269.698	266.744	265.692	266.621	267.527	263.707	259.476	260.488	256.201	252.082	252.683	253.592	250.103	245.914	231.575
308.821	305.155	301.481	301.919	298.252	295.223	291.057	286.988	287.814	283.703	279.765	280.703	281.752	277.821	278.805	274.323	270.249	267.285	266.239	267.163	268.065	264.24	260.004	261.012	256.721	252.598	253.196	254.1	250.604	246.412	232.046
309.452	305.779	302.099	302.535	298.861	295.823	291.652	287.579	288.401	284.286	280.342	281.276	282.32	278.384	279.363	274.878	270.801	267.827	266.786	267.705	268.602	264.772	260.533	261.535	257.241	253.114	253.709	254.609	251.106	246.909	232.516
310.082	306.403	302.716	303.15	299.47	296.422	292.248	288.171	288.988	284.869	280.92	281.849	282.889	278.947	279.922	275.434	271.352	268.368	267.332	268.247	269.14	265.304	261.061	262.059	257.761	253.63	254.222	255.118	251.607	247.407	232.987
310.713	307.027	303.334	303.766	300.079	297.022	292.843	288.762	289.575	285.452	281.498	282.422	283.457	279.51	280.48	275.99	271.903	268.91	267.879	268.789	269.678	265.836	261.589	262.582	258.281	254.146	254.735	255.626	252.108	247.904	233.457
311.343	307.651	303.951	304.381	300.688	297.621	293.439	289.352	290.162	286.034	282.075	282.995	284.025	280.073	281.038	276.545	272.454	269.451	268.425	269.331	270.215	266.368	262.117	263.105	258.801	254.662	255.248	256.135	252.61	248.402	233.927
311.973	308.275	304.569	304.996	301.297	298.221	294.034	289.943	290.749	286.617	282.653	283.568	284.593	280.636	281.596	277.101	273.005	269.992	268.971	269.873	270.753	266.9	262.646	263.629	259.321	255.178	255.761	256.643	253.111	248.899	234.398
312.603	308.899	305.186	305.612	301.906	298.82	294.629	290.534	291.336	287.199	283.23	284.141	285.16	281.199	282.154	277.656	273.556	270.534	269.518	270.415	271.29	267.431	263.174	264.152	259.841	255.693	256.274	257.152	253.612	249.396	234.868
313.234	309.522	305.803	306.227	302.515	299.419	295.225	291.125	291.923	287.782	283.808	284.714	285.728	281.761	282.712	278.212	274.107	271.075	270.064	270.957	271.828	267.963	263.702	264.675	260.361	256.209	256.787	257.66	254.113	249.894	235.338
313.864	310.146	306.421	306.842	303.124	300.018	295.82	291.716	292.51	288.364	284.385	285.287	286.296	282.324	283.27	278.767	274.658	271.616	270.61	271.498	272.365	268.495	264.23	265.199	260.881	256.724	257.299	258.168	254.614	250.391	235.808
314.494	310.769	307.038	307.457	303.732	300.618	296.415	292.306	293.096	288.947	284.962	285.86	286.864	282.887	283.827	279.323	275.209	272.157	271.156	272.04	272.903	269.027	264.758	265.722	261.4	257.24	257.812	258.677	255.115	250.888	236.278
315.123	311.393	307.655	308.072	304.341	301.217	297.01	292.897	293.683	289.529	285.539	286.432	287.431	283.449	284.385	279.878	275.76	272.698	271.702	272.582	273.44	269.558	265.286	266.245	261.92	257.755	258.324	259.185	255.616	251.385	236.748
315.753	312.016	308.272	308.687	304.949	301.816	297.605	293.487	294.269	290.111	286.117	287.005	287.999	284.011	284.943	280.433	276.311	273.239	272.248	273.123	273.977	270.09	265.814	266.768	262.44	258.271	258.837	259.693	256.117	251.882	237.218
316.383	312.64	308.889	309.301	305.558	302.415	298.2	294.078	294.856	290.693	286.694	287.578	288.566	284.574	285.501	280.988	276.861	273.78	272.794	273.665	274.514	270.621	266.342	267.291	262.959	258.786	259.349	260.201	256.618	252.379	237.688
317.013	313.263	309.506	309.916	306.166	303.013	298.795	294.668	295.442	291.276	287.271	288.15	289.134	285.136	286.058	281.543	277.412	274.321	273.34	274.206	275.051	271.153	266.869	267.814	263.479	259.301	259.862	260.709	257.119	252.876	238.158
317.642	313.886	310.122	310.531	306.774	303.612	299.389	295.258	296.029	291.858	287.848	288.723	289.701	285.698	286.616	282.098	277.963	274.861	273.886	274.747	275.588	271.684	267.397	268.337	263.998	259.817	260.374	261.217	257.62	253.373	238.628
318.272	314.509	310.739	311.146	307.382	304.211	299.984	295.849	296.615	292.44	288.425	289.295	290.269	286.261	287.173	282.653	278.513	275.402	274.431	275.289	276.125	272.215	267.925	268.859	264.518	260.332	260.886	261.725	258.12	253.87	239.098
318.901	315.132	311.356	311.76	307.991	304.81	300.579	296.439	297.201	293.021	289.001	289.867	290.836	286.823	287.73	283.208	279.064	275.943	274.977	275.83	276.662	272.747	268.452	269.382	265.037	260.847	261.399	262.233	258.621	254.367	239.567
319.531	315.755	311.972	312.375	308.599	305.408	301.173	297.029	297.787	293.603	289.578	290.439	291.403	287.385	288.288	283.763	279.614	276.483	275.523	276.371	277.199	273.278	268.98	269.905	265.556	261.362	261.911	262.741	259.122	254.863	240.037
320.16	316.378	312.589	312.989	309.207	306.007	301.768	297.619	298.373	294.185	290.155	291.012	291.97	287.947	288.845	284.318	280.164	277.024	276.068	276.912	277.736	273.809	269.507	270.427	266.075	261.877	262.423	263.249	259.622	255.36	240.507
320.789	317.001	313.205	313.603	309.815	306.605	302.362	298.209	298.959	294.767	290.731	291.584	292.537	288.509	289.402	284.873	280.715	277.564	276.614	277.453	278.273	274.34	270.035	270.95	266.595	262.392	262.935	263.756	260.123	255.857	240.976
321.418	317.624	313.822	314.218	310.422	307.204	302.957	298.799	299.545	295.349	291.308	292.156	293.104	289.071	289.959	285.427	281.265	278.105	277.159	277.994	278.809	274.871	270.562	271.473	267.114	262.907	263.447	264.264	260.623	256.353	241.446
322.047	318.246	314.438	314.832	311.03	307.802	303.551	299.389	300.131	295.93	291.885	292.728	293.671	289.632	290.517	285.982	281.815	278.645	277.705	278.535	279.346	275.402	271.089	271.995	267.633	263.422	263.959	264.772	261.124	256.85	241.915
322.677	318.869	315.054	315.446	311.638	308.4	304.145	299.978	300.717	296.512	292.461	293.3	294.238	290.194	291.074	286.536	282.365	279.186	278.25	279.076	279.882	275.933	271.617	272.517	268.152	263.936	264.471	265.279	261.624	257.346	242.385
323.305	319.492	315.671	316.06	312.246	308.998	304.74	300.568	301.303	297.093	293.037	293.872	294.805	290.756	291.631	287.091	282.915	279.726	278.795	279.617	280.419	276.464	272.144	273.04	268.671	264.451	264.983	265.787	262.124	257.843	242.854
323.934	320.114	316.287	316.674	312.853	309.597	305.334	301.158	301.888	297.675	293.614	294.443	295.372	291.317	292.187	287.645	283.465	280.266	279.34	280.158	280.955	276.995	272.671	273.562	269.19	264.966	265.495	266.294	262.625	258.339	243.323
324.563	320.736	316.903	317.288	313.461	310.195	305.928	301.747	302.474	298.256	294.19	295.015	295.938	291.879	292.744	288.2	284.015	280.806	279.886	280.699	281.492	277.525	273.198	274.084	269.708	265.48	266.006	266.802	263.125	258.835	243.793
325.192	321.359	317.519	317.902	314.068	310.793	306.522	302.337	303.06	298.837	294.766	295.587	296.505	292.441	293.301	288.754	284.565	281.346	280.431	281.239	282.028	278.056	273.725	274.607	270.227	265.995	266.518	267.309	263.625	259.332	244.262
325.821	321.981	318.135	318.516	314.676	311.391	307.116	302.926	303.645	299.419	295.342	296.159	297.072	293.002	293.858	289.308	285.115	281.886	280.976	281.78	282.564	278.587	274.252	275.129	270.746	266.51	267.03	267.816	264.125	259.828	244.731
326.449	322.603	318.751	319.13	315.283	311.989	307.71	303.516	304.231	300	295.918	296.73	297.638	293.563	294.415	289.862	285.664	282.426	281.521	282.321	283.101	279.117	274.779	275.651	271.265	267.024	267.541	268.324	264.625	260.324	245.2
327.078	323.225	319.366	319.743	315.89	312.586	308.303	304.105	304.816	300.581	296.494	297.302	298.205	294.125	294.971	290.417	286.214	282.966	282.066	282.861	283.637	279.648	275.306	276.173	271.783	267.538	268.053	268.831	265.125	260.82	245.669
327.706	323.848	319.982	320.357	316.498	313.184	308.897	304.695	305.401	301.162	297.07	297.873	298.771	294.686	295.528	290.971	286.764	283.506	282.611	283.401	284.173	280.178	275.833	276.695	272.302	268.053	268.564	269.338	265.625	261.316	246.138
328.335	324.47	320.598	320.97	317.105	313.782	309.491	305.284	305.986	301.743	297.646	298.444	299.337	295.247	296.084	291.525	287.313	284.046	283.155	283.942	284.709	280.709	276.359	277.217	272.82	268.567	269.076	269.845	266.125	261.812	246.607
328.963	325.091	321.213	321.584	317.712	314.379	310.085	305.873	306.572	302.324	298.222	299.016	299.904	295.808	296.641	292.079	287.863	284.586	283.7	284.482	285.245	281.239	276.886	277.739	273.339	269.081	269.587	270.352	266.625	262.308	247.076
329.591	325.713	321.829	322.197	318.319	314.977	310.678	306.462	307.157	302.905	298.798	299.587	300.47	296.369	297.197	292.632	288.412	285.125	284.245	285.022	285.781	281.769	277.413	278.26	273.857	269.596	270.099	270.859	267.125	262.804	247.545
330.22	326.335	322.444	322.811	318.926	315.574	311.272	307.051	307.742	303.485	299.373	300.158	301.036	296.931	297.753	293.186	288.962	285.665	284.79	285.563	286.317	282.3	277.939	278.782	274.376	270.11	270.61	271.366	267.624	263.3	248.014
330.848	326.957	323.06	323.424	319.533	316.172	311.865	307.64	308.327	304.066	299.949	300.729	301.602	297.491	298.31	293.74	289.511	286.204	285.334	286.103	286.853	282.83	278.466	279.304	274.894	270.624	271.121	271.873	268.124	263.796	248.483
331.476	327.579	323.675	324.037	320.139	316.769	312.458	308.229	308.912	304.647	300.525	301.3	302.168	298.052	298.866	294.294	290.06	286.744	285.879	286.643	287.388	283.36	278.992	279.825	275.412	271.138	271.632	272.38	268.624	264.292	248.951
332.104	328.2	324.29	324.65	320.746	317.366	313.052	308.818	309.497	305.227	301.1	301.871	302.734	298.613	299.422	294.847	290.609	287.283	286.423	287.183	287.924	283.89	279.519	280.347	275.93	271.652	272.143	272.887	269.123	264.787	249.42
332.732	328.822	324.905	325.263	321.353	317.964	313.645	309.406	310.081	305.808	301.676	302.442	303.3	299.174	299.978	295.401	291.159	287.823	286.968	287.723	288.46	284.42	280.045	280.869	276.448	272.166	272.654	273.393	269.623	265.283	249.889
333.36	329.443	325.52	325.876	321.96	318.561	314.238	309.995	310.666	306.388	302.251	303.013	303.866	299.735	300.534	295.955	291.708	288.362	287.512	288.263	288.995	284.95	280.571	281.39	276.967	272.68	273.165	273.9	270.122	265.778	250.357
333.987	330.065	326.135	326.489	322.566	319.158	314.831	310.584	311.251	306.969	302.826	303.584	304.432	300.295	301.09	296.508	292.257	288.901	288.056	288.803	289.531	285.48	281.098	281.911	277.485	273.193	273.676	274.407	270.622	266.274	250.826
334.615	330.686	326.75	327.102	323.173	319.755	315.424	311.172	311.835	307.549	303.402	304.155	304.998	300.856	301.646	297.061	292.806	289.441	288.6	289.342	290.066	286.01	281.624	282.433	278.003	273.707	274.187	274.913	271.121	266.77	251.294
335.243	331.307	327.365	327.715	323.779	320.352	316.017	311.761	312.42	308.129	303.977	304.726	305.563	301.417	302.202	297.615	293.355	289.98	289.145	289.882	290.602	286.54	282.15	282.954	278.52	274.221	274.698	275.42	271.62	267.265	251.763
335.87	331.928	327.98	328.328	324.385	320.949	316.61	312.349	313.004	308.71	304.552	305.296	306.129	301.977	302.757	298.168	293.903	290.519	289.689	290.422	291.137	287.069	282.676	283.475	279.038	274.735	275.209	275.926	272.119	267.76	252.231
336.498	332.549	328.595	328.94	324.992	321.546	317.203	312.938	313.589	309.29	305.127	305.867	306.694	302.538	303.313	298.721	294.452	291.058	290.233	290.962	291.673	287.599	283.202	283.997	279.556	275.248	275.72	276.433	272.619	268.256	252.7
337.125	333.17	329.21	329.553	325.598	322.142	317.796	313.526	314.173	309.87	305.702	306.437	307.26	303.098	303.869	299.275	295.001	291.597	290.777	291.501	292.208	288.129	283.728	284.518	280.074	275.762	276.23	276.939	273.118	268.751	253.168
337.753	333.791	329.824	330.165	326.204	322.739	318.388	314.114	314.758	310.45	306.277	307.008	307.825	303.658	304.424	299.828	295.55	292.136	291.321	292.041	292.743	288.658	284.254	285.039	280.592	276.275	276.741	277.445	273.617	269.246	253.636
338.38	334.412	330.439	330.778	326.81	323.336	318.981	314.702	315.342	311.03	306.852	307.578	308.391	304.218	304.98	300.381	296.098	292.675	291.865	292.58	293.278	289.188	284.78	285.56	281.109	276.789	277.252	277.952	274.116	269.741	254.104
339.007	335.033	331.053	331.39	327.416	323.932	319.574	315.29	315.926	311.61	307.427	308.149	308.956	304.779	305.535	300.934	296.647	293.214	292.408	293.119	293.813	289.717	285.306	286.081	281.627	277.302	277.762	278.458	274.615	270.237	254.573
339.634	335.654	331.668	332.003	328.022	324.529	320.166	315.879	316.51	312.19	308.001	308.719	309.521	305.339	306.091	301.487	297.195	293.752	292.952	293.659	294.348	290.247	285.831	286.602	282.144	277.815	278.273	278.964	275.114	270.732	255.041
340.261	336.275	332.282	332.615	328.628	325.125	320.759	316.466	317.094	312.769	308.576	309.289	310.086	305.899	306.646	302.04	297.744	294.291	293.496	294.198	294.883	290.776	286.357	287.123	282.662	278.329	278.783	279.47	275.613	271.227	255.509
340.888	336.895	332.896	333.227	329.234	325.722	321.351	317.054	317.678	313.349	309.151	309.859	310.652	306.459	307.202	302.592	298.292	294.83	294.039	294.737	295.418	291.305	286.883	287.643	283.179	278.842	279.293	279.976	276.112	271.722	255.977
341.515	337.516	333.511	333.839	329.839	326.318	321.943	317.642	318.262	313.929	309.725	310.429	311.217	307.019	307.757	303.145	298.84	295.368	294.583	295.276	295.953	291.835	287.408	288.164	283.697	279.355	279.804	280.482	276.61	272.217	256.445
342.142	338.136	334.125	334.451	330.445	326.914	322.535	318.23	318.846	314.508	310.3	310.999	311.782	307.579	308.312	303.698	299.389	295.907	295.127	295.816	296.488	292.364	287.934	288.685	284.214	279.868	280.314	280.988	277.109	272.711	256.913
342.769	338.757	334.739	335.063	331.051	327.51	323.128	318.818	319.43	315.088	310.874	311.569	312.347	308.138	308.867	304.25	299.937	296.445	295.67	296.355	297.022	292.893	288.459	289.205	284.731	280.381	280.824	281.494	277.608	273.206	257.381
343.396	339.377	335.353	335.675	331.656	328.107	323.72	319.405	320.013	315.667	311.449	312.139	312.911	308.698	309.422	304.803	300.485	296.984	296.213	296.894	297.557	293.422	288.985	289.726	285.248	280.894	281.334	282	278.106	273.701	257.848
344.022	339.997	335.967	336.287	332.262	328.703	324.312	319.993	320.597	316.247	312.023	312.709	313.476	309.258	309.977	305.356	301.033	297.522	296.757	297.433	298.092	293.951	289.51	290.247	285.765	281.407	281.844	282.505	278.605	274.196	258.316
344.649	340.618	336.581	336.899	332.867	329.299	324.904	320.581	321.18	316.826	312.597	313.279	314.041	309.818	310.532	305.908	301.581	298.06	297.3	297.971	298.626	294.48	290.035	290.767	286.282	281.92	282.354	283.011	279.104	274.69	258.784
345.276	341.238	337.194	337.51	333.472	329.894	325.496	321.168	321.764	317.405	313.171	313.848	314.606	310.377	311.087	306.46	302.129	298.598	297.843	298.51	299.161	295.009	290.561	291.288	286.8	282.433	282.864	283.517	279.602	275.185	259.252
345.902	341.858	337.808	338.122	334.078	330.49	326.088	321.755	322.347	317.985	313.746	314.418	315.17	310.937	311.642	307.013	302.677	299.137	298.387	299.049	299.695	295.538	291.086	291.808	287.316	282.946	283.374	284.022	280.1	275.679	259.719
346.528	342.478	338.422	338.734	334.683	331.086	326.679	322.343	322.931	318.564	314.32	314.988	315.735	311.496	312.196	307.565	303.225	299.675	298.93	299.588	300.23	296.066	291.611	292.328	287.833	283.458	283.884	284.528	280.599	276.174	260.187
347.155	343.098	339.035	339.345	335.288	331.682	327.271	322.93	323.514	319.143	314.894	315.557	316.299	312.056	312.751	308.117	303.773	300.213	299.473	300.126	300.764	296.595	292.136	292.848	288.35	283.971	284.394	285.033	281.097	276.668	260.654
347.781	343.718	339.649	339.957	335.893	332.277	327.863	323.517	324.097	319.722	315.468	316.127	316.864	312.615	313.306	308.669	304.32	300.751	300.016	300.665	301.298	297.124	292.661	293.369	288.867	284.484	284.904	285.539	281.595	277.163	261.122
348.407	344.338	340.262	340.568	336.498	332.873	328.454	324.104	324.681	320.301	316.041	316.696	317.428	313.174	313.86	309.222	304.868	301.289	300.559	301.204	301.833	297.652	293.186	293.889	289.384	284.996	285.413	286.044	282.094	277.657	261.589
349.033	344.957	340.876	341.179	337.103	333.469	329.046	324.692	325.264	320.88	316.615	317.265	317.993	313.733	314.415	309.774	305.416	301.827	301.102	301.742	302.367	298.181	293.711	294.409	289.901	285.509	285.923	286.55	282.592	278.151	262.057
349.659	345.577	341.489	341.791	337.708	334.064	329.637	325.279	325.847	321.459	317.189	317.835	318.557	314.292	314.969	310.326	305.963	302.365	301.644	302.28	302.901	298.709	294.236	294.929	290.417	286.021	286.433	287.055	283.09	278.646	262.524
350.285	346.197	342.102	342.402	338.313	334.659	330.229	325.866	326.43	322.037	317.763	318.404	319.121	314.852	315.524	310.877	306.511	302.902	302.187	302.819	303.435	299.238	294.76	295.449	290.934	286.534	286.942	287.56	283.588	279.14	262.991
350.911	346.816	342.716	343.013	338.917	335.255	330.82	326.452	327.013	322.616	318.336	318.973	319.685	315.411	316.078	311.429	307.058	303.44	302.73	303.357	303.969	299.766	295.285	295.969	291.45	287.046	287.452	288.065	284.086	279.634	263.459
351.537	347.436	343.329	343.624	339.522	335.85	331.411	327.039	327.596	323.195	318.91	319.542	320.249	315.97	316.632	311.981	307.606	303.978	303.273	303.895	304.503	300.295	295.81	296.489	291.967	287.558	287.961	288.57	284.584	280.128	263.926
352.163	348.055	343.942	344.235	340.127	336.445	332.003	327.626	328.178	323.773	319.483	320.111	320.813	316.528	317.187	312.533	308.153	304.515	303.815	304.433	305.037	300.823	296.334	297.008	292.483	288.07	288.47	289.075	285.082	280.622	264.393
352.788	348.674	344.555	344.846	340.731	337.04	332.594	328.213	328.761	324.352	320.057	320.68	321.377	317.087	317.741	313.085	308.7	305.053	304.358	304.972	305.571	301.351	296.859	297.528	293	288.583	288.98	289.58	285.58	281.116	264.86
353.414	349.293	345.168	345.457	341.336	337.635	333.185	328.799	329.344	324.93	320.63	321.249	321.941	317.646	318.295	313.636	309.247	305.59	304.9	305.51	306.104	301.879	297.383	298.048	293.516	289.095	289.489	290.085	286.077	281.61	265.327
354.04	349.913	345.781	346.067	341.94	338.23	333.776	329.386	329.927	325.509	321.204	321.818	322.505	318.205	318.849	314.188	309.795	306.128	305.443	306.048	306.638	302.407	297.908	298.568	294.032	289.607	289.998	290.59	286.575	282.104	265.794
354.665	350.532	346.393	346.678	342.544	338.825	334.367	329.972	330.509	326.087	321.777	322.387	323.069	318.764	319.403	314.739	310.342	306.665	305.985	306.586	307.172	302.935	298.432	299.087	294.548	290.119	290.507	291.095	287.073	282.598	266.261
355.291	351.151	347.006	347.289	343.149	339.42	334.958	330.559	331.092	326.665	322.35	322.955	323.632	319.322	319.957	315.291	310.889	307.202	306.527	307.124	307.705	303.463	298.957	299.607	295.065	290.631	291.017	291.6	287.57	283.092	266.728
355.916	351.77	347.619	347.899	343.753	340.015	335.549	331.145	331.674	327.243	322.923	323.524	324.196	319.881	320.511	315.842	311.436	307.74	307.069	307.661	308.239	303.991	299.481	300.126	295.581	291.143	291.526	292.105	288.068	283.585	267.195
356.541	352.389	348.231	348.51	344.357	340.61	336.139	331.731	332.256	327.821	323.496	324.093	324.76	320.439	321.064	316.393	311.983	308.277	307.612	308.199	308.772	304.519	300.005	300.646	296.097	291.655	292.035	292.609	288.565	284.079	267.661
357.166	353.008	348.844	349.12	344.961	341.204	336.73	332.318	332.839	328.399	324.069	324.661	325.323	320.998	321.618	316.945	312.529	308.814	308.154	308.737	309.306	305.047	300.529	301.165	296.613	292.166	292.544	293.114	289.063	284.573	268.128
357.791	353.626	349.456	349.73	345.565	341.799	337.321	332.904	333.421	328.977	324.642	325.23	325.887	321.556	322.172	317.496	313.076	309.351	308.696	309.274	309.839	305.575	301.053	301.684	297.129	292.678	293.052	293.619	289.56	285.066	268.595
358.416	354.245	350.069	350.341	346.169	342.393	337.911	333.49	334.003	329.555	325.215	325.798	326.45	322.114	322.725	318.047	313.623	309.888	309.238	309.812	310.372	306.102	301.578	302.204	297.644	293.19	293.561	294.123	290.058	285.56	269.062
359.041	354.864	350.681	350.951	346.773	342.988	338.502	334.076	334.585	330.133	325.788	326.366	327.013	322.672	323.279	318.598	314.17	310.425	309.78	310.35	310.906	306.63	302.102	302.723	298.16	293.701	294.07	294.628	290.555	286.053	269.528
359.666	355.482	351.293	351.561	347.377	343.582	339.092	334.662	335.167	330.711	326.361	326.935	327.577	323.231	323.832	319.149	314.716	310.962	310.322	310.887	311.439	307.158	302.625	303.242	298.676	294.213	294.579	295.132	291.052	286.547	269.995
360.291	356.101	351.905	352.171	347.98	344.177	339.682	335.248	335.749	331.289	326.933	327.503	328.14	323.789	324.386	319.7	315.263	311.499	310.864	311.425	311.972	307.685	303.149	303.761	299.192	294.724	295.088	295.636	291.549	287.04	270.461
360.916	356.719	352.517	352.781	348.584	344.771	340.273	335.834	336.331	331.867	327.506	328.071	328.703	324.347	324.939	320.251	315.809	312.036	311.405	311.962	312.505	308.213	303.673	304.28	299.707	295.236	295.596	296.141	292.047	287.533	270.928
361.541	357.337	353.129	353.391	349.188	345.365	340.863	336.42	336.913	332.444	328.078	328.639	329.266	324.905	325.493	320.802	316.356	312.572	311.947	312.499	313.038	308.74	304.197	304.799	300.223	295.747	296.105	296.645	292.544	288.026	271.394
362.165	357.956	353.741	354.001	349.791	345.959	341.453	337.005	337.495	333.022	328.651	329.207	329.829	325.463	326.046	321.353	316.902	313.109	312.489	313.036	313.571	309.267	304.721	305.318	300.738	296.259	296.613	297.149	293.041	288.52	271.86
362.79	358.574	354.353	354.611	350.395	346.553	342.043	337.591	338.077	333.599	329.223	329.775	330.392	326.021	326.599	321.903	317.448	313.646	313.03	313.574	314.104	309.795	305.244	305.837	301.254	296.77	297.122	297.653	293.538	289.013	272.327
363.414	359.192	354.965	355.221	350.998	347.147	342.633	338.177	338.658	334.177	329.796	330.343	330.955	326.578	327.152	322.454	317.995	314.182	313.572	314.111	314.637	310.322	305.768	306.356	301.769	297.281	297.63	298.157	294.035	289.506	272.793
364.039	359.81	355.577	355.83	351.601	347.741	343.223	338.762	339.24	334.754	330.368	330.911	331.518	327.136	327.705	323.005	318.541	314.719	314.113	314.648	315.169	310.849	306.291	306.874	302.285	297.792	298.138	298.661	294.532	289.999	273.259
364.663	360.428	356.189	356.44	352.205	348.335	343.813	339.348	339.821	335.331	330.94	331.479	332.081	327.694	328.258	323.555	319.087	315.255	314.655	315.185	315.702	311.376	306.815	307.393	302.8	298.304	298.647	299.165	295.028	290.492	273.725
365.287	361.046	356.8	357.049	352.808	348.929	344.403	339.933	340.403	335.909	331.512	332.046	332.643	328.252	328.811	324.106	319.633	315.791	315.196	315.722	316.235	311.903	307.338	307.912	303.315	298.815	299.155	299.669	295.525	290.985	274.192
365.912	361.664	357.412	357.659	353.411	349.523	344.993	340.518	340.984	336.486	332.085	332.614	333.206	328.809	329.364	324.656	320.179	316.328	315.737	316.259	316.767	312.43	307.862	308.43	303.831	299.326	299.663	300.173	296.022	291.478	274.658
366.536	362.282	358.023	358.268	354.014	350.116	345.582	341.104	341.566	337.063	332.657	333.181	333.769	329.367	329.917	325.206	320.725	316.864	316.279	316.796	317.3	312.957	308.385	308.949	304.346	299.837	300.171	300.677	296.519	291.971	275.124
367.16	362.899	358.635	358.878	354.617	350.71	346.172	341.689	342.147	337.64	333.229	333.749	334.331	329.924	330.47	325.757	321.271	317.4	316.82	317.332	317.833	313.484	308.908	309.467	304.861	300.348	300.679	301.181	297.015	292.463	275.59
367.784	363.517	359.246	359.487	355.22	351.303	346.762	342.274	342.728	338.217	333.801	334.316	334.894	330.481	331.022	326.307	321.817	317.936	317.361	317.869	318.365	314.011	309.432	309.986	305.376	300.859	301.187	301.685	297.512	292.956	276.056
368.408	364.135	359.857	360.096	355.823	351.897	347.351	342.859	343.309	338.794	334.372	334.884	335.456	331.039	331.575	326.857	322.362	318.472	317.902	318.406	318.897	314.538	309.955	310.504	305.891	301.369	301.695	302.188	298.008	293.449	276.521
369.032	364.752	360.469	360.705	356.425	352.49	347.941	343.444	343.89	339.371	334.944	335.451	336.018	331.596	332.128	327.407	322.908	319.008	318.443	318.942	319.43	315.065	310.478	311.022	306.406	301.88	302.203	302.692	298.505	293.941	276.987
369.656	365.37	361.08	361.314	357.028	353.084	348.53	344.029	344.471	339.947	335.516	336.018	336.581	332.153	332.68	327.957	323.454	319.544	318.984	319.479	319.962	315.591	311.001	311.541	306.921	302.391	302.711	303.195	299.001	294.434	277.453
370.279	365.987	361.691	361.923	357.631	353.677	349.119	344.614	345.052	340.524	336.088	336.586	337.143	332.71	333.233	328.507	323.999	320.08	319.525	320.015	320.494	316.118	311.524	312.059	307.435	302.901	303.219	303.699	299.498	294.926	277.919
370.903	366.604	362.302	362.532	358.233	354.27	349.709	345.199	345.633	341.101	336.659	337.153	337.705	333.267	333.785	329.057	324.545	320.616	320.066	320.552	321.026	316.645	312.047	312.577	307.95	303.412	303.727	304.202	299.994	295.419	278.384
371.526	367.222	362.913	363.141	358.836	354.863	350.298	345.783	346.214	341.677	337.231	337.72	338.267	333.825	334.337	329.607	325.09	321.152	320.606	321.088	321.558	317.171	312.57	313.095	308.465	303.923	304.234	304.706	300.49	295.911	278.85
372.15	367.839	363.524	363.75	359.438	355.456	350.887	346.368	346.795	342.254	337.802	338.287	338.829	334.381	334.89	330.157	325.636	321.688	321.147	321.625	322.09	317.697	313.093	313.613	308.98	304.433	304.742	305.209	300.986	296.404	279.316
372.773	368.456	364.134	364.359	360.041	356.049	351.476	346.953	347.375	342.83	338.374	338.854	339.391	334.938	335.442	330.707	326.181	322.223	321.688	322.161	322.622	318.224	313.615	314.131	309.494	304.944	305.25	305.712	301.482	296.896	279.781
373.397	369.073	364.745	364.967	360.643	356.642	352.065	347.537	347.956	343.407	338.945	339.421	339.953	335.495	335.994	331.256	326.726	322.759	322.228	322.697	323.154	318.75	314.138	314.649	310.009	305.454	305.757	306.216	301.978	297.388	280.247
374.02	369.69	365.356	365.576	361.245	357.235	352.654	348.122	348.537	343.983	339.516	339.988	340.515	336.052	336.546	331.806	327.272	323.295	322.769	323.233	323.686	319.276	314.661	315.167	310.523	305.964	306.265	306.719	302.475	297.88	280.712
374.643	370.307	365.966	366.184	361.848	357.828	353.243	348.706	349.117	344.559	340.088	340.555	341.077	336.609	337.098	332.356	327.817	323.83	323.309	323.769	324.218	319.803	315.183	315.685	311.038	306.474	306.772	307.222	302.971	298.373	281.177
375.266	370.924	366.577	366.793	362.45	358.421	353.831	349.291	349.698	345.136	340.659	341.121	341.638	337.165	337.65	332.905	328.362	324.366	323.85	324.305	324.75	320.329	315.706	316.202	311.552	306.985	307.279	307.725	303.466	298.865	281.643
375.89	371.54	367.187	367.401	363.052	359.013	354.42	349.875	350.278	345.712	341.23	341.688	342.2	337.722	338.202	333.455	328.907	324.901	324.39	324.841	325.281	320.855	316.228	316.72	312.066	307.495	307.787	308.228	303.962	299.357	282.108
376.513	372.157	367.798	368.009	363.654	359.606	355.009	350.459	350.858	346.288	341.801	342.254	342.762	338.278	338.754	334.004	329.452	325.436	324.931	325.377	325.813	321.381	316.751	317.238	312.581	308.005	308.294	308.731	304.458	299.849	282.573
377.136	372.774	368.408	368.618	364.256	360.199	355.597	351.043	351.439	346.864	342.372	342.821	343.323	338.835	339.306	334.553	329.997	325.972	325.471	325.913	326.345	321.907	317.273	317.755	313.095	308.515	308.801	309.234	304.954	300.341	283.038
377.758	373.39	369.018	369.226	364.857	360.791	356.186	351.627	352.019	347.44	342.943	343.387	343.885	339.391	339.857	335.103	330.542	326.507	326.011	326.449	326.876	322.433	317.795	318.273	313.609	309.025	309.308	309.737	305.45	300.833	283.504
378.381	374.007	369.628	369.834	365.459	361.384	356.774	352.211	352.599	348.016	343.514	343.954	344.446	339.948	340.409	335.652	331.087	327.042	326.551	326.985	327.408	322.959	318.318	318.79	314.123	309.535	309.815	310.24	305.945	301.324	283.969
379.004	374.623	370.239	370.442	366.061	361.976	357.363	352.795	353.179	348.592	344.085	344.52	345.008	340.504	340.961	336.201	331.632	327.577	327.091	327.52	327.939	323.485	318.84	319.308	314.637	310.045	310.323	310.742	306.441	301.816	284.434
379.627	375.239	370.849	371.05	366.663	362.568	357.951	353.379	353.759	349.167	344.655	345.087	345.569	341.06	341.512	336.75	332.176	328.112	327.631	328.056	328.47	324.01	319.362	319.825	315.151	310.555	310.83	311.245	306.937	302.308	284.899
380.249	375.856	371.459	371.658	367.264	363.16	358.539	353.963	354.339	349.743	345.226	345.653	346.13	341.616	342.064	337.299	332.721	328.647	328.171	328.592	329.002	324.536	319.884	320.342	315.665	311.064	311.336	311.748	307.432	302.8	285.364
380.872	376.472	372.069	372.266	367.866	363.753	359.128	354.547	354.919	350.319	345.797	346.219	346.691	342.173	342.615	337.848	333.265	329.182	328.711	329.127	329.533	325.062	320.406	320.86	316.179	311.574	311.843	312.25	307.927	303.291	285.829
381.494	377.088	372.678	372.873	368.467	364.345	359.716	355.131	355.499	350.894	346.367	346.785	347.252	342.729	343.167	338.397	333.81	329.717	329.251	329.662	330.064	325.587	320.928	321.377	316.693	312.084	312.35	312.753	308.423	303.783	286.293
382.117	377.704	373.288	373.481	369.068	364.937	360.304	355.714	356.078	351.47	346.938	347.351	347.813	343.285	343.718	338.946	334.354	330.252	329.791	330.198	330.595	326.113	321.45	321.894	317.207	312.593	312.857	313.255	308.918	304.274	286.758
382.739	378.32	373.898	374.089	369.67	365.529	360.892	356.298	356.658	352.045	347.508	347.917	348.374	343.84	344.269	339.495	334.899	330.786	330.33	330.733	331.126	326.638	321.972	322.411	317.72	313.103	313.364	313.758	309.414	304.766	287.223
383.361	378.936	374.508	374.696	370.271	366.121	361.48	356.881	357.238	352.621	348.078	348.483	348.935	344.396	344.82	340.044	335.443	331.321	330.87	331.268	331.657	327.164	322.494	322.928	318.234	313.612	313.87	314.26	309.909	305.257	287.688
383.983	379.552	375.117	375.304	370.872	366.712	362.068	357.465	357.817	353.196	348.649	349.049	349.496	344.952	345.372	340.592	335.987	331.856	331.41	331.804	332.188	327.689	323.015	323.445	318.748	314.122	314.377	314.763	310.404	305.749	288.152
384.605	380.168	375.727	375.911	371.473	367.304	362.656	358.048	358.397	353.771	349.219	349.615	350.057	345.508	345.923	341.141	336.532	332.39	331.949	332.339	332.719	328.215	323.537	323.962	319.261	314.631	314.883	315.265	310.899	306.24	288.617
385.228	380.783	376.336	376.519	372.074	367.896	363.243	358.632	358.976	354.347	349.789	350.18	350.618	346.064	346.474	341.689	337.076	332.925	332.489	332.874	333.25	328.74	324.059	324.479	319.775	315.141	315.39	315.767	311.394	306.731	289.081
385.849	381.399	376.945	377.126	372.675	368.487	363.831	359.215	359.555	354.922	350.359	350.746	351.178	346.619	347.025	342.238	337.62	333.459	333.028	333.409	333.781	329.265	324.58	324.996	320.288	315.65	315.896	316.269	311.889	307.222	289.546
386.471	382.015	377.555	377.733	373.276	369.079	364.419	359.798	360.135	355.497	350.929	351.312	351.739	347.175	347.576	342.786	338.164	333.994	333.567	333.944	334.311	329.79	325.102	325.512	320.801	316.159	316.403	316.771	312.384	307.713	290.01
387.093	382.63	378.164	378.34	373.877	369.671	365.006	360.381	360.714	356.072	351.499	351.877	352.3	347.73	348.126	343.335	338.708	334.528	334.107	334.479	334.842	330.315	325.623	326.029	321.315	316.668	316.909	317.273	312.879	308.205	290.475
387.715	383.246	378.773	378.947	374.478	370.262	365.594	360.964	361.293	356.647	352.069	352.443	352.86	348.286	348.677	343.883	339.252	335.062	334.646	335.014	335.373	330.84	326.145	326.546	321.828	317.177	317.415	317.775	313.374	308.696	290.939
388.337	383.861	379.382	379.554	375.078	370.853	366.181	361.547	361.872	357.222	352.639	353.008	353.421	348.841	349.228	344.431	339.796	335.597	335.185	335.549	335.903	331.365	326.666	327.062	322.341	317.686	317.922	318.277	313.869	309.187	291.403
388.958	384.476	379.991	380.161	375.679	371.445	366.768	362.13	362.451	357.796	353.209	353.573	353.981	349.396	349.779	344.98	340.34	336.131	335.724	336.083	336.434	331.89	327.187	327.579	322.854	318.195	318.428	318.779	314.364	309.678	291.868
389.58	385.091	380.6	380.768	376.28	372.036	367.356	362.713	363.03	358.371	353.779	354.139	354.541	349.952	350.329	345.528	340.883	336.665	336.263	336.618	336.964	332.415	327.709	328.095	323.368	318.704	318.934	319.281	314.858	310.168	292.332
390.201	385.707	381.209	381.375	376.88	372.627	367.943	363.296	363.609	358.946	354.348	354.704	355.102	350.507	350.88	346.076	341.427	337.199	336.802	337.153	337.494	332.94	328.23	328.612	323.881	319.213	319.44	319.783	315.353	310.659	292.796
390.823	386.322	381.818	381.982	377.481	373.218	368.53	363.879	364.188	359.521	354.918	355.269	355.662	351.062	351.43	346.624	341.971	337.733	337.341	337.687	338.025	333.465	328.751	329.128	324.394	319.722	319.946	320.285	315.848	311.15	293.26
391.444	386.937	382.427	382.588	378.081	373.809	369.117	364.461	364.767	360.095	355.487	355.834	356.222	351.617	351.981	347.172	342.514	338.267	337.88	338.222	338.555	333.989	329.272	329.644	324.907	320.231	320.452	320.786	316.342	311.641	293.724
392.065	387.552	383.035	383.195	378.681	374.4	369.704	365.044	365.345	360.67	356.057	356.399	356.782	352.172	352.531	347.72	343.058	338.801	338.419	338.756	339.085	334.514	329.793	330.161	325.419	320.74	320.958	321.288	316.837	312.131	294.188
392.686	388.167	383.644	383.802	379.282	374.991	370.291	365.627	365.924	361.244	356.626	356.964	357.342	352.727	353.081	348.268	343.601	339.335	338.958	339.291	339.615	335.038	330.314	330.677	325.932	321.248	321.464	321.789	317.331	312.622	294.652
393.308	388.781	384.252	384.408	379.882	375.582	370.878	366.209	366.503	361.818	357.196	357.529	357.902	353.282	353.631	348.815	344.145	339.868	339.497	339.825	340.145	335.563	330.835	331.193	326.445	321.757	321.97	322.291	317.826	313.113	295.116
393.929	389.396	384.861	385.014	380.482	376.173	371.465	366.791	367.081	362.393	357.765	358.094	358.462	353.837	354.182	349.363	344.688	340.402	340.035	340.359	340.675	336.087	331.356	331.709	326.958	322.266	322.475	322.792	318.32	313.603	295.58
394.55	390.011	385.469	385.621	381.082	376.763	372.052	367.374	367.659	362.967	358.334	358.659	359.022	354.391	354.732	349.911	345.231	340.936	340.574	340.893	341.205	336.612	331.876	332.225	327.47	322.774	322.981	323.294	318.814	314.094	296.044
395.171	390.625	386.078	386.227	381.682	377.354	372.638	367.956	368.238	363.541	358.903	359.223	359.581	354.946	355.282	350.458	345.775	341.469	341.112	341.428	341.735	337.136	332.397	332.741	327.983	323.283	323.487	323.795	319.308	314.584	296.508
395.791	391.24	386.686	386.833	382.282	377.945	373.225	368.538	368.816	364.115	359.472	359.788	360.141	355.501	355.832	351.006	346.318	342.003	341.651	341.962	342.265	337.661	332.918	333.257	328.496	323.791	323.992	324.296	319.803	315.074	296.971
396.412	391.854	387.294	387.439	382.881	378.535	373.812	369.121	369.394	364.689	360.041	360.353	360.701	356.055	356.382	351.553	346.861	342.536	342.189	342.496	342.795	338.185	333.438	333.773	329.008	324.299	324.498	324.798	320.297	315.565	297.435
397.033	392.469	387.902	388.045	383.481	379.126	374.398	369.703	369.973	365.263	360.61	360.917	361.26	356.61	356.932	352.101	347.404	343.07	342.728	343.03	343.325	338.709	333.959	334.289	329.521	324.808	325.003	325.299	320.791	316.055	297.899
397.654	393.083	388.51	388.651	384.081	379.716	374.984	370.285	370.551	365.837	361.179	361.482	361.82	357.164	357.481	352.648	347.947	343.603	343.266	343.564	343.854	339.233	334.48	334.804	330.033	325.316	325.509	325.8	321.285	316.545	298.362
398.274	393.697	389.118	389.257	384.681	380.306	375.571	370.867	371.129	366.411	361.748	362.046	362.379	357.719	358.031	353.196	348.49	344.136	343.804	344.098	344.384	339.757	335	335.32	330.545	325.824	326.014	326.301	321.779	317.035	298.826
398.895	394.312	389.726	389.863	385.28	380.897	376.157	371.449	371.707	366.985	362.317	362.61	362.939	358.273	358.581	353.743	349.033	344.67	344.342	344.631	344.914	340.281	335.52	335.836	331.058	326.332	326.519	326.802	322.273	317.526	299.289
399.515	394.926	390.334	390.469	385.88	381.487	376.743	372.03	372.285	367.559	362.886	363.175	363.498	358.827	359.13	354.29	349.575	345.203	344.88	345.165	345.443	340.805	336.041	336.351	331.57	326.84	327.025	327.303	322.767	318.016	299.753
400.135	395.54	390.942	391.075	386.479	382.077	377.33	372.612	372.863	368.132	363.454	363.739	364.057	359.382	359.68	354.837	350.118	345.736	345.419	345.699	345.972	341.329	336.561	336.867	332.082	327.348	327.53	327.804	323.26	318.506	300.216
400.756	396.154	391.55	391.68	387.078	382.667	377.916	373.194	373.44	368.706	364.023	364.303	364.617	359.936	360.23	355.384	350.661	346.269	345.957	346.233	346.502	341.853	337.081	337.382	332.594	327.856	328.035	328.305	323.754	318.996	300.679
401.376	396.768	392.157	392.286	387.678	383.257	378.502	373.776	374.018	369.279	364.591	364.867	365.176	360.49	360.779	355.931	351.204	346.802	346.494	346.766	347.031	342.377	337.601	337.898	333.106	328.364	328.54	328.806	324.248	319.485	301.142
401.996	397.382	392.765	392.891	388.277	383.847	379.088	374.357	374.596	369.853	365.16	365.431	365.735	361.044	361.328	356.478	351.746	347.335	347.032	347.3	347.56	342.9	338.121	338.413	333.618	328.872	329.045	329.307	324.742	319.975	301.606
402.616	397.995	393.372	393.497	388.876	384.437	379.674	374.939	375.174	370.426	365.728	365.995	366.294	361.598	361.878	357.025	352.289	347.868	347.57	347.833	348.09	343.424	338.642	338.928	334.13	329.38	329.55	329.807	325.235	320.465	302.069
403.236	398.609	393.98	394.102	389.475	385.026	380.259	375.52	375.751	371	366.297	366.559	366.853	362.152	362.427	357.572	352.831	348.401	348.108	348.367	348.619	343.948	339.162	339.443	334.642	329.888	330.055	330.308	325.729	320.955	302.532
403.856	399.223	394.587	394.708	390.074	385.616	380.845	376.101	376.329	371.573	366.865	367.123	367.412	362.706	362.976	358.119	353.373	348.934	348.646	348.9	349.148	344.471	339.681	339.959	335.154	330.395	330.56	330.808	326.222	321.445	302.995
404.476	399.836	395.195	395.313	390.673	386.206	381.431	376.683	376.906	372.146	367.433	367.687	367.97	363.259	363.525	358.665	353.916	349.466	349.183	349.433	349.677	344.995	340.201	340.474	335.666	330.903	331.065	331.309	326.716	321.934	303.458
405.096	400.45	395.802	395.918	391.272	386.795	382.017	377.264	377.483	372.719	368.001	368.251	368.529	363.813	364.074	359.212	354.458	349.999	349.721	349.966	350.206	345.518	340.721	340.989	336.177	331.41	331.569	331.81	327.209	322.424	303.921
405.715	401.063	396.409	396.523	391.871	387.385	382.602	377.845	378.061	373.293	368.569	368.814	369.088	364.367	364.623	359.759	355	350.532	350.259	350.5	350.735	346.041	341.241	341.504	336.689	331.918	332.074	332.31	327.702	322.913	304.384
406.335	401.677	397.016	397.128	392.47	387.974	383.188	378.426	378.638	373.866	369.138	369.378	369.647	364.92	365.172	360.305	355.542	351.064	350.796	351.033	351.264	346.565	341.761	342.019	337.201	332.425	332.579	332.81	328.196	323.403	304.847
406.955	402.29	397.623	397.733	393.068	388.564	383.773	379.007	379.215	374.439	369.705	369.941	370.205	365.474	365.721	360.852	356.085	351.597	351.333	351.566	351.793	347.088	342.28	342.534	337.712	332.933	333.083	333.311	328.689	323.892	305.31
407.574	402.903	398.23	398.338	393.667	389.153	384.359	379.588	379.792	375.011	370.273	370.505	370.764	366.028	366.27	361.398	356.627	352.129	351.871	352.099	352.321	347.611	342.8	343.049	338.224	333.44	333.588	333.811	329.182	324.382	305.773
408.194	403.516	398.837	398.943	394.265	389.742	384.944	380.169	380.369	375.584	370.841	371.068	371.322	366.581	366.819	361.944	357.169	352.661	352.408	352.632	352.85	348.134	343.32	343.563	338.735	333.948	334.092	334.311	329.675	324.871	306.235
408.813	404.129	399.444	399.548	394.864	390.332	385.529	380.75	380.946	376.157	371.409	371.632	371.881	367.134	367.368	362.491	357.71	353.194	352.945	353.165	353.379	348.658	343.839	344.078	339.247	334.455	334.597	334.811	330.168	325.36	306.698
409.432	404.742	400.051	400.152	395.462	390.921	386.114	381.331	381.523	376.73	371.977	372.195	372.439	367.688	367.916	363.037	358.252	353.726	353.483	353.698	353.907	349.181	344.358	344.593	339.758	334.962	335.101	335.311	330.661	325.849	307.161
410.052	405.355	400.657	400.757	396.061	391.51	386.7	381.912	382.1	377.302	372.544	372.758	372.997	368.241	368.465	363.583	358.794	354.258	354.02	354.23	354.436	349.704	344.878	345.107	340.269	335.469	335.605	335.812	331.154	326.339	307.623
410.671	405.968	401.264	401.362	396.659	392.099	387.285	382.493	382.677	377.875	373.112	373.321	373.555	368.794	369.014	364.129	359.336	354.79	354.557	354.763	354.964	350.226	345.397	345.622	340.78	335.976	336.11	336.312	331.647	326.828	308.086
411.29	406.581	401.87	401.966	397.257	392.688	387.87	383.073	383.253	378.448	373.68	373.884	374.114	369.347	369.562	364.675	359.878	355.322	355.094	355.296	355.493	350.749	345.916	346.137	341.292	336.483	336.614	336.812	332.14	327.317	308.548
411.909	407.194	402.477	402.571	397.855	393.276	388.455	383.654	383.83	379.02	374.247	374.447	374.672	369.9	370.11	365.221	360.419	355.854	355.631	355.828	356.021	351.272	346.436	346.651	341.803	336.99	337.118	337.311	332.633	327.806	309.011
412.528	407.806	403.083	403.175	398.453	393.865	389.039	384.234	384.407	379.593	374.814	375.01	375.23	370.453	370.659	365.767	360.961	356.386	356.168	356.361	356.549	351.795	346.955	347.165	342.314	337.497	337.622	337.811	333.126	328.295	309.473
413.147	408.419	403.69	403.779	399.051	394.454	389.624	384.815	384.983	380.165	375.382	375.573	375.788	371.006	371.207	366.313	361.502	356.918	356.704	356.893	357.078	352.318	347.474	347.68	342.825	338.004	338.126	338.311	333.618	328.784	309.935
413.765	409.032	404.296	404.383	399.649	395.043	390.209	385.395	385.56	380.737	375.949	376.136	376.346	371.559	371.755	366.859	362.044	357.45	357.241	357.426	357.606	352.84	347.993	348.194	343.336	338.511	338.63	338.811	334.111	329.272	310.398
414.384	409.644	404.902	404.988	400.247	395.631	390.794	385.975	386.136	381.309	376.516	376.699	376.904	372.112	372.304	367.404	362.585	357.982	357.778	357.958	358.134	353.363	348.512	348.708	343.847	339.018	339.134	339.311	334.604	329.761	310.86
415.003	410.256	405.508	405.592	400.845	396.22	391.378	386.555	386.712	381.881	377.083	377.262	377.461	372.665	372.852	367.95	363.126	358.514	358.315	358.49	358.662	353.885	349.031	349.223	344.357	339.524	339.638	339.81	335.096	330.25	311.322
415.621	410.869	406.115	406.196	401.443	396.808	391.963	387.136	387.289	382.454	377.65	377.824	378.019	373.217	373.4	368.496	363.668	359.045	358.851	359.023	359.19	354.408	349.55	349.737	344.868	340.031	340.142	340.31	335.589	330.739	311.784
416.24	411.481	406.721	406.8	402.041	397.397	392.547	387.716	387.865	383.026	378.217	378.387	378.577	373.77	373.948	369.041	364.209	359.577	359.388	359.555	359.718	354.93	350.069	350.251	345.379	340.538	340.646	340.809	336.081	331.227	312.246
416.858	412.093	407.326	407.404	402.638	397.985	393.132	388.296	388.441	383.598	378.784	378.95	379.134	374.323	374.496	369.587	364.75	360.109	359.924	360.087	360.246	355.453	350.587	350.765	345.89	341.044	341.15	341.309	336.574	331.716	312.709
417.477	412.705	407.932	408.007	403.236	398.573	393.716	388.876	389.017	384.169	379.351	379.512	379.692	374.875	375.044	370.132	365.291	360.64	360.461	360.619	360.774	355.975	351.106	351.279	346.4	341.551	341.653	341.808	337.066	332.204	313.171
418.095	413.317	408.538	408.611	403.833	399.162	394.3	389.456	389.593	384.741	379.918	380.075	380.249	375.428	375.591	370.678	365.832	361.172	360.997	361.151	361.301	356.497	351.625	351.793	346.911	342.057	342.157	342.308	337.558	332.693	313.632
418.713	413.929	409.144	409.215	404.431	399.75	394.885	390.035	390.169	385.313	380.485	380.637	380.807	375.98	376.139	371.223	366.373	361.703	361.533	361.683	361.829	357.019	352.143	352.306	347.421	342.564	342.66	342.807	338.05	333.181	314.094
419.332	414.541	409.75	409.818	405.028	400.338	395.469	390.615	390.745	385.885	381.052	381.199	381.364	376.532	376.687	371.768	366.914	362.234	362.07	362.215	362.357	357.542	352.662	352.82	347.932	343.07	343.164	343.306	338.543	333.67	314.556
419.95	415.153	410.355	410.422	405.625	400.926	396.053	391.195	391.321	386.456	381.618	381.761	381.921	377.085	377.235	372.314	367.455	362.766	362.606	362.747	362.884	358.064	353.18	353.334	348.442	343.576	343.667	343.805	339.035	334.158	315.018
420.568	415.765	410.961	411.025	406.222	401.514	396.637	391.775	391.897	387.028	382.185	382.324	382.479	377.637	377.782	372.859	367.996	363.297	363.142	363.279	363.412	358.586	353.699	353.848	348.953	344.082	344.171	344.304	339.527	334.646	315.48
421.186	416.377	411.566	411.629	406.82	402.102	397.221	392.354	392.472	387.6	382.751	382.886	383.036	378.189	378.33	373.404	368.536	363.828	363.678	363.81	363.939	359.108	354.217	354.361	349.463	344.589	344.674	344.804	340.019	335.135	315.942
421.804	416.988	412.172	412.232	407.417	402.689	397.805	392.934	393.048	388.171	383.318	383.448	383.593	378.741	378.877	373.949	369.077	364.359	364.214	364.342	364.467	359.63	354.735	354.875	349.973	345.095	345.177	345.303	340.511	335.623	316.403
422.422	417.6	412.777	412.836	408.014	403.277	398.389	393.513	393.624	388.742	383.884	384.01	384.15	379.293	379.425	374.494	369.618	364.89	364.75	364.874	364.994	360.151	355.254	355.388	350.483	345.601	345.681	345.802	341.003	336.111	316.865
423.039	418.211	413.382	413.439	408.611	403.865	398.972	394.093	394.199	389.314	384.451	384.572	384.707	379.845	379.972	375.039	370.158	365.421	365.286	365.405	365.522	360.673	355.772	355.902	350.993	346.107	346.184	346.301	341.495	336.599	317.326
423.657	418.823	413.987	414.042	409.208	404.452	399.556	394.672	394.775	389.885	385.017	385.134	385.264	380.397	380.519	375.584	370.699	365.952	365.822	365.937	366.049	361.195	356.29	356.415	351.504	346.613	346.687	346.799	341.986	337.087	317.788
424.275	419.434	414.593	414.645	409.804	405.04	400.14	395.251	395.35	390.456	385.583	385.695	385.821	380.949	381.066	376.128	371.239	366.483	366.358	366.468	366.576	361.717	356.808	356.929	352.014	347.119	347.19	347.298	342.478	337.575	318.249
424.892	420.045	415.198	415.248	410.401	405.628	400.723	395.83	395.925	391.027	386.149	386.257	386.378	381.501	381.614	376.673	371.78	367.014	366.893	367	367.103	362.238	357.326	357.442	352.524	347.624	347.693	347.797	342.97	338.063	318.711
425.51	420.657	415.803	415.851	410.998	406.215	401.307	396.409	396.5	391.598	386.715	386.819	386.934	382.052	382.161	377.218	372.32	367.544	367.429	367.531	367.63	362.76	357.844	357.955	353.033	348.13	348.196	348.296	343.462	338.551	319.172
426.127	421.268	416.408	416.454	411.594	406.802	401.89	396.989	397.076	392.169	387.281	387.38	387.491	382.604	382.708	377.762	372.86	368.075	367.965	368.062	368.157	363.281	358.362	358.468	353.543	348.636	348.699	348.794	343.953	339.039	319.634
426.744	421.879	417.012	417.057	412.191	407.39	402.474	397.568	397.651	392.74	387.847	387.942	388.048	383.156	383.255	378.307	373.4	368.606	368.5	368.593	368.684	363.803	358.88	358.982	354.053	349.142	349.202	349.293	344.445	339.526	320.095
427.362	422.49	417.617	417.659	412.787	407.977	403.057	398.146	398.226	393.311	388.413	388.503	388.604	383.707	383.802	378.851	373.941	369.136	369.036	369.125	369.211	364.324	359.398	359.495	354.563	349.647	349.705	349.792	344.936	340.014	320.556
427.979	423.101	418.222	418.262	413.384	408.564	403.64	398.725	398.801	393.882	388.979	389.065	389.161	384.259	384.349	379.396	374.481	369.667	369.571	369.656	369.738	364.846	359.915	360.008	355.073	350.153	350.207	350.29	345.428	340.502	321.017
428.596	423.712	418.827	418.865	413.98	409.151	404.223	399.304	399.376	394.453	389.545	389.626	389.717	384.81	384.895	379.94	375.021	370.197	370.107	370.187	370.265	365.367	360.433	360.521	355.582	350.658	350.71	350.789	345.919	340.989	321.478
429.213	424.322	419.431	419.467	414.576	409.738	404.806	399.883	399.951	395.024	390.111	390.188	390.274	385.361	385.442	380.485	375.561	370.728	370.642	370.718	370.792	365.888	360.951	361.033	356.092	351.164	351.213	351.287	346.41	341.477	321.939
429.83	424.933	420.036	420.07	415.173	410.325	405.39	400.462	400.525	395.594	390.676	390.749	390.83	385.913	385.989	381.029	376.101	371.258	371.177	371.249	371.318	366.409	361.468	361.546	356.601	351.669	351.715	351.785	346.902	341.964	322.4
430.447	425.544	420.64	420.672	415.769	410.912	405.973	401.04	401.1	396.165	391.242	391.31	391.386	386.464	386.535	381.573	376.64	371.788	371.712	371.779	371.845	366.93	361.986	362.059	357.111	352.175	352.218	352.284	347.393	342.452	322.861
431.064	426.155	421.245	421.274	416.365	411.499	406.555	401.619	401.675	396.735	391.807	391.871	391.942	387.015	387.082	382.117	377.18	372.319	372.247	372.31	372.372	367.451	362.503	362.572	357.62	352.68	352.72	352.782	347.884	342.939	323.322
431.681	426.765	421.849	421.877	416.961	412.086	407.138	402.197	402.249	397.306	392.373	392.432	392.499	387.566	387.629	382.661	377.72	372.849	372.783	372.841	372.898	367.972	363.021	363.085	358.129	353.185	353.223	353.28	348.375	343.426	323.783
432.297	427.376	422.453	422.479	417.557	412.672	407.721	402.776	402.824	397.876	392.938	392.993	393.055	388.117	388.175	383.205	378.26	373.379	373.318	373.372	373.425	368.493	363.538	363.597	358.639	353.69	353.725	353.778	348.866	343.914	324.244
432.914	427.986	423.057	423.081	418.153	413.259	408.304	403.354	403.399	398.446	393.504	393.554	393.611	388.668	388.721	383.749	378.799	373.909	373.853	373.902	373.951	369.014	364.055	364.11	359.148	354.195	354.228	354.276	349.357	344.401	324.705
433.531	428.596	423.661	423.683	418.749	413.845	408.886	403.932	403.973	399.017	394.069	394.115	394.167	389.219	389.268	384.293	379.339	374.439	374.387	374.433	374.477	369.535	364.573	364.622	359.657	354.7	354.73	354.774	349.848	344.888	325.166
434.147	429.207	424.266	424.285	419.344	414.432	409.469	404.511	404.547	399.587	394.634	394.676	394.723	389.77	389.814	384.837	379.878	374.969	374.922	374.963	375.004	370.056	365.09	365.135	360.166	355.205	355.232	355.272	350.339	345.375	325.626
434.764	429.817	424.869	424.887	419.94	415.018	410.052	405.089	405.122	400.157	395.199	395.237	395.278	390.321	390.36	385.381	380.418	375.499	375.457	375.494	375.53	370.577	365.607	365.647	360.675	355.71	355.734	355.77	350.83	345.862	326.087
435.38	430.427	425.473	425.489	420.536	415.605	410.634	405.667	405.696	400.727	395.764	395.797	395.834	390.872	390.906	385.924	380.957	376.029	375.992	376.024	376.056	371.097	366.124	366.16	361.185	356.215	356.236	356.268	351.321	346.349	326.548
435.996	431.037	426.077	426.091	421.131	416.191	411.217	406.245	406.27	401.297	396.329	396.358	396.39	391.422	391.452	386.468	381.496	376.558	376.527	376.555	376.582	371.618	366.641	366.672	361.693	356.72	356.738	356.766	351.812	346.836	327.008
436.613	431.647	426.681	426.692	421.727	416.777	411.799	406.823	406.844	401.867	396.894	396.919	396.946	391.973	391.998	387.012	382.036	377.088	377.061	377.085	377.108	372.138	367.158	367.184	362.202	357.225	357.24	357.264	352.302	347.323	327.469
437.229	432.257	427.285	427.294	422.322	417.364	412.381	407.401	407.418	402.437	397.459	397.479	397.501	392.524	392.544	387.555	382.575	377.618	377.596	377.615	377.634	372.659	367.675	367.696	362.711	357.73	357.742	357.761	352.793	347.81	327.929
437.845	432.867	427.888	427.896	422.917	417.95	412.963	407.979	407.992	403.007	398.024	398.039	398.057	393.074	393.09	388.099	383.114	378.147	378.13	378.145	378.16	373.179	368.192	368.208	363.22	358.234	358.244	358.259	353.284	348.297	328.389
438.461	433.476	428.492	428.497	423.513	418.536	413.545	408.556	408.566	403.576	398.589	398.6	398.612	393.625	393.636	388.642	383.653	378.677	378.665	378.675	378.686	373.7	368.709	368.721	363.729	358.739	358.746	358.757	353.774	348.784	328.85
439.077	434.086	429.095	429.099	424.108	419.122	414.128	409.134	409.14	404.146	399.154	399.16	399.168	394.175	394.182	389.186	384.192	379.206	379.199	379.206	379.212	374.22	369.225	369.233	364.238	359.244	359.248	359.254	354.265	349.27	329.31
439.693	434.696	429.699	429.7	424.703	419.708	414.71	409.712	409.714	404.716	399.718	399.72	399.723	394.725	394.728	389.729	384.731	379.736	379.733	379.736	379.738	374.74	369.742	369.745	364.746	359.748	359.75	359.752	354.755	349.757	329.77
440.309	435.305	430.302	430.301	425.298	420.293	415.292	410.289	410.287	405.285	400.283	400.281	400.278	395.276	395.273	390.272	385.27	380.265	380.268	380.265	380.263	375.261	370.259	370.256	365.255	360.253	360.251	360.249	355.246	350.244	330.231
440.924	435.915	430.906	430.902	425.893	420.879	415.873	410.867	410.861	405.855	400.847	400.841	400.833	395.826	395.819	390.815	385.809	380.795	380.802	380.795	380.789	375.781	370.775	370.768	365.763	360.757	360.753	360.747	355.736	350.73	330.691
441.54	436.524	431.509	431.504	426.488	421.465	416.455	411.444	411.435	406.424	401.412	401.401	401.389	396.376	396.365	391.358	386.348	381.324	381.336	381.325	381.315	376.301	371.292	371.28	366.272	361.262	361.255	361.244	356.226	351.217	331.151
442.156	437.134	432.112	432.105	427.083	422.051	417.037	412.022	412.008	406.994	401.976	401.961	401.944	396.926	396.91	391.902	386.886	381.853	381.87	381.855	381.84	376.821	371.808	371.792	366.78	361.766	361.756	361.741	356.717	351.703	331.611
442.771	437.743	432.715	432.706	427.678	422.636	417.619	412.599	412.582	407.563	402.541	402.521	402.499	397.476	397.455	392.445	387.425	382.382	382.404	382.385	382.366	377.341	372.325	372.304	367.289	362.27	362.258	362.238	357.207	352.19	332.071
443.387	438.352	433.318	433.307	428.273	423.222	418.2	413.176	413.155	408.132	403.105	403.081	403.054	398.026	398.001	392.988	387.964	382.911	382.938	382.914	382.891	377.861	372.841	372.815	367.797	362.774	362.759	362.736	357.697	352.676	332.531
444.002	438.961	433.921	433.908	428.867	423.807	418.782	413.754	413.728	408.701	403.669	403.641	403.609	398.576	398.546	393.53	388.502	383.44	383.472	383.444	383.417	378.381	373.357	373.327	368.305	363.278	363.26	363.233	358.187	353.162	332.991
444.617	439.57	434.524	434.509	429.462	424.393	419.363	414.331	414.302	409.271	404.233	404.2	404.163	399.126	399.091	394.073	389.041	383.969	384.006	383.973	383.942	378.901	373.874	373.838	368.813	363.783	363.762	363.73	358.677	353.649	333.451
445.233	440.18	435.127	435.109	430.056	424.978	419.945	414.908	414.875	409.84	404.797	404.76	404.718	399.676	399.637	394.616	389.579	384.498	384.54	384.503	384.467	379.42	374.39	374.35	369.322	364.287	364.263	364.227	359.167	354.135	333.91
445.848	440.788	435.73	435.71	430.651	425.563	420.526	415.485	415.448	410.409	405.361	405.32	405.273	400.225	400.182	395.159	390.118	385.027	385.073	385.032	384.992	379.94	374.906	374.861	369.83	364.791	364.764	364.724	359.657	354.621	334.37
446.463	441.397	436.332	436.311	431.245	426.148	421.108	416.062	416.021	410.978	405.925	405.879	405.828	400.775	400.727	395.701	390.656	385.556	385.607	385.562	385.517	380.46	375.422	375.373	370.338	365.295	365.265	365.221	360.147	355.107	334.83
447.078	442.006	436.935	436.911	431.84	426.734	421.689	416.639	416.594	411.546	406.489	406.439	406.382	401.325	401.272	396.244	391.194	386.084	386.141	386.091	386.043	380.979	375.938	375.884	370.846	365.798	365.766	365.718	360.637	355.593	335.29
447.693	442.615	437.537	437.512	432.434	427.319	422.27	417.215	417.167	412.115	407.053	406.998	406.937	401.874	401.817	396.787	391.732	386.613	386.674	386.62	386.568	381.499	376.454	376.395	371.354	366.302	366.267	366.214	361.126	356.079	335.749
448.308	443.224	438.14	438.112	433.028	427.904	422.851	417.792	417.74	412.684	407.617	407.558	407.491	402.424	402.362	397.329	392.27	387.142	387.208	387.15	387.093	382.018	376.97	376.906	371.862	366.806	366.768	366.711	361.616	356.565	336.209
448.923	443.832	438.742	438.713	433.622	428.489	423.432	418.369	418.313	413.253	408.181	408.117	408.046	402.973	402.907	397.871	392.809	387.67	387.741	387.679	387.617	382.538	377.486	377.418	372.369	367.31	367.269	367.208	362.106	357.051	336.668
449.537	444.441	439.345	439.313	434.216	429.074	424.013	418.946	418.886	413.821	408.744	408.676	408.6	403.523	403.451	398.414	393.347	388.199	388.275	388.208	388.142	383.057	378.002	377.929	372.877	367.813	367.77	367.704	362.595	357.537	337.128
450.152	445.049	439.947	439.913	434.81	429.658	424.594	419.522	419.458	414.39	409.308	409.235	409.154	404.072	403.996	398.956	393.885	388.727	388.808	388.737	388.667	383.576	378.517	378.44	373.385	368.317	368.271	368.201	363.085	358.023	337.587
450.767	445.658	440.549	440.513	435.404	430.243	425.175	420.099	420.031	414.958	409.871	409.795	409.709	404.621	404.541	399.498	394.422	389.256	389.341	389.266	389.192	384.096	379.033	378.951	373.893	368.821	368.772	368.698	363.574	358.508	338.047
451.381	446.266	441.151	441.114	435.998	430.828	425.756	420.675	420.604	415.527	410.435	410.354	410.263	405.17	405.085	400.04	394.96	389.784	389.875	389.795	389.717	384.615	379.549	379.462	374.4	369.324	369.272	369.194	364.064	358.994	338.506
451.996	446.874	441.753	441.714	436.592	431.412	426.336	421.251	421.176	416.095	410.998	410.913	410.817	405.72	405.63	400.583	395.498	390.312	390.408	390.324	390.241	385.134	380.064	379.972	374.908	369.828	369.773	369.691	364.553	359.48	338.965
452.61	447.483	442.356	442.314	437.186	431.997	426.917	421.828	421.749	416.663	411.562	411.472	411.371	406.269	406.174	401.125	396.036	390.841	390.941	390.852	390.766	385.653	380.58	380.483	375.415	370.331	370.274	370.187	365.043	359.965	339.425
453.225	448.091	442.957	442.913	437.779	432.581	427.498	422.404	422.321	417.232	412.125	412.031	411.925	406.818	406.719	401.667	396.574	391.369	391.474	391.381	391.29	386.172	381.095	380.994	375.923	370.834	370.774	370.683	365.532	360.451	339.884
453.839	448.699	443.559	443.513	438.373	433.166	428.078	422.98	422.893	417.8	412.688	412.589	412.479	407.367	407.263	402.209	397.111	391.897	392.007	391.91	391.815	386.691	381.611	381.505	376.43	371.338	371.275	371.18	366.021	360.936	340.343
454.453	449.307	444.161	444.113	438.967	433.75	428.659	423.556	423.466	418.368	413.251	413.148	413.033	407.915	407.807	402.751	397.649	392.425	392.54	392.438	392.339	387.21	382.126	382.015	376.937	371.841	371.775	371.676	366.51	361.422	340.802
455.067	449.915	444.763	444.713	439.56	434.335	429.239	424.132	424.038	418.936	413.814	413.707	413.587	408.464	408.352	403.292	398.186	392.953	393.073	392.967	392.864	387.729	382.641	382.526	377.445	372.344	372.276	372.172	367	361.907	341.261
455.681	450.523	445.365	445.312	440.154	434.919	429.819	424.708	424.61	419.504	414.377	414.266	414.141	409.013	408.896	403.834	398.724	393.481	393.606	393.495	393.388	388.248	383.157	383.036	377.952	372.847	372.776	372.668	367.489	362.392	341.72
456.295	451.13	445.966	445.912	440.747	435.503	430.4	425.284	425.182	420.072	414.94	414.824	414.694	409.562	409.44	404.376	399.261	394.009	394.138	394.024	393.912	388.767	383.672	383.547	378.459	373.35	373.276	373.164	367.978	362.878	342.179
456.909	451.738	446.568	446.512	441.34	436.087	430.98	425.86	425.754	420.64	415.503	415.383	415.248	410.11	409.984	404.917	399.798	394.537	394.671	394.552	394.436	389.285	384.187	384.057	378.966	373.853	373.776	373.66	368.467	363.363	342.638
457.523	452.346	447.169	447.111	441.933	436.671	431.56	426.436	426.326	421.208	416.066	415.941	415.801	410.659	410.528	405.459	400.336	395.064	395.204	395.081	394.96	389.804	384.702	384.568	379.473	374.356	374.277	374.156	368.956	363.848	343.097
458.137	452.953	447.771	447.71	442.527	437.255	432.14	427.012	426.898	421.775	416.629	416.5	416.355	411.208	411.072	406.001	400.873	395.592	395.736	395.609	395.485	390.323	385.217	385.078	379.98	374.859	374.777	374.652	369.445	364.333	343.556
458.751	453.561	448.372	448.31	443.12	437.839	432.72	427.587	427.47	422.343	417.192	417.058	416.908	411.756	411.616	406.542	401.41	396.12	396.269	396.137	396.009	390.841	385.732	385.588	380.487	375.362	375.277	375.148	369.933	364.818	344.014
459.365	454.168	448.973	448.909	443.713	438.423	433.3	428.163	428.041	422.911	417.754	417.616	417.462	412.304	412.16	407.084	401.947	396.647	396.801	396.665	396.533	391.36	386.247	386.099	380.994	375.865	375.777	375.644	370.422	365.303	344.473
459.978	454.776	449.575	449.508	444.306	439.007	433.88	428.739	428.613	423.478	418.317	418.175	418.015	412.853	412.703	407.625	402.484	397.175	397.334	397.193	397.056	391.878	386.762	386.609	381.501	376.368	376.277	376.139	370.911	365.788	344.932
460.592	455.383	450.176	450.107	444.899	439.59	434.46	429.314	429.185	424.046	418.88	418.733	418.568	413.401	413.247	408.166	403.021	397.702	397.866	397.721	397.58	392.396	387.277	387.119	382.008	376.87	376.777	376.635	371.4	366.273	345.39
461.205	455.99	450.777	450.706	445.491	440.174	435.04	429.889	429.756	424.613	419.442	419.291	419.122	413.949	413.791	408.707	403.558	398.23	398.398	398.249	398.104	392.915	387.791	387.629	382.514	377.373	377.277	377.131	371.888	366.758	345.849
461.819	456.598	451.378	451.305	446.084	440.757	435.619	430.465	430.328	425.181	420.004	419.849	419.675	414.498	414.334	409.249	404.095	398.757	398.931	398.777	398.628	393.433	388.306	388.139	383.021	377.876	377.776	377.626	372.377	367.243	346.307
462.432	457.205	451.979	451.904	446.677	441.341	436.199	431.04	430.899	425.748	420.567	420.407	420.228	415.046	414.878	409.79	404.632	399.284	399.463	399.305	399.152	393.951	388.821	388.649	383.528	378.378	378.276	378.122	372.865	367.727	346.766
463.045	457.812	452.58	452.503	447.27	441.924	436.779	431.615	431.471	426.315	421.129	420.965	420.781	415.594	415.421	410.331	405.168	399.812	399.995	399.833	399.675	394.469	389.335	389.159	384.034	378.881	378.776	378.617	373.354	368.212	347.224
463.658	458.419	453.18	453.102	447.862	442.508	437.358	432.191	432.042	426.882	421.691	421.523	421.334	416.142	415.965	410.872	405.705	400.339	400.527	400.361	400.199	394.987	389.85	389.669	384.541	379.383	379.275	379.113	373.842	368.697	347.683
464.271	459.026	453.781	453.7	448.455	443.091	437.937	432.766	432.613	427.449	422.254	422.081	421.887	416.69	416.508	411.413	406.242	400.866	401.059	400.889	400.722	395.505	390.364	390.178	385.047	379.885	379.775	379.608	374.331	369.181	348.141
464.885	459.632	454.382	454.299	449.047	443.674	438.517	433.341	433.185	428.016	422.816	422.638	422.44	417.238	417.052	411.954	406.778	401.393	401.591	401.416	401.246	396.023	390.879	390.688	385.554	380.388	380.275	380.103	374.819	369.666	348.599
465.498	460.239	454.982	454.898	449.639	444.258	439.096	433.916	433.756	428.583	423.378	423.196	422.993	417.785	417.595	412.494	407.315	401.92	402.123	401.944	401.769	396.541	391.393	391.198	386.06	380.89	380.774	380.599	375.307	370.15	349.057
466.11	460.846	455.583	455.496	450.232	444.841	439.675	434.491	434.327	429.15	423.94	423.754	423.545	418.333	418.138	413.035	407.851	402.447	402.655	402.471	402.292	397.059	391.907	391.707	386.566	381.392	381.273	381.094	375.795	370.635	349.516
466.723	461.453	456.183	456.095	450.824	445.424	440.255	435.065	434.898	429.717	424.502	424.311	424.098	418.881	418.681	413.576	408.388	402.974	403.187	402.999	402.816	397.577	392.422	392.217	387.073	381.894	381.773	381.589	376.283	371.119	349.974
467.336	462.059	456.784	456.693	451.416	446.007	440.834	435.64	435.469	430.284	425.064	424.869	424.651	419.428	419.224	414.117	408.924	403.501	403.718	403.526	403.339	398.095	392.936	392.726	387.579	382.396	382.272	382.084	376.772	371.604	350.432
467.949	462.666	457.384	457.291	452.008	446.59	441.413	436.215	436.04	430.851	425.625	425.426	425.203	419.976	419.767	414.657	409.46	404.028	404.25	404.054	403.862	398.612	393.45	393.236	388.085	382.899	382.771	382.579	377.26	372.088	350.89
468.561	463.272	457.985	457.89	452.6	447.173	441.992	436.79	436.61	431.417	426.187	425.983	425.756	420.524	420.31	415.198	409.996	404.554	404.782	404.581	404.385	399.13	393.964	393.745	388.591	383.401	383.271	383.074	377.748	372.572	351.348
469.174	463.879	458.585	458.488	453.192	447.755	442.571	437.364	437.181	431.984	426.749	426.541	426.308	421.071	420.853	415.738	410.533	405.081	405.313	405.108	404.908	399.648	394.478	394.255	389.097	383.903	383.77	383.569	378.236	373.056	351.806
469.787	464.485	459.185	459.086	453.784	448.338	443.15	437.939	437.752	432.551	427.31	427.098	426.86	421.618	421.396	416.279	411.069	405.608	405.845	405.635	405.431	400.165	394.992	394.764	389.603	384.404	384.269	384.064	378.723	373.541	352.264
470.399	465.091	459.785	459.684	454.376	448.921	443.728	438.513	438.322	433.117	427.872	427.655	427.413	422.166	421.939	416.819	411.605	406.134	406.376	406.163	405.954	400.683	395.506	395.273	390.109	384.906	384.768	384.559	379.211	374.025	352.722
471.011	465.697	460.385	460.282	454.968	449.504	444.307	439.088	438.893	433.684	428.433	428.212	427.965	422.713	422.481	417.359	412.141	406.661	406.907	406.69	406.477	401.2	396.02	395.782	390.615	385.408	385.267	385.054	379.699	374.509	353.179
471.624	466.303	460.985	460.88	455.56	450.086	444.886	439.662	439.464	434.25	428.995	428.769	428.517	423.26	423.024	417.899	412.677	407.187	407.439	407.217	407	401.717	396.534	396.291	391.121	385.91	385.766	385.549	380.187	374.993	353.637
472.236	466.909	461.585	461.478	456.151	450.669	445.464	440.236	440.034	434.816	429.556	429.326	429.069	423.807	423.566	418.44	413.213	407.714	407.97	407.744	407.523	402.235	397.047	396.8	391.627	386.411	386.265	386.043	380.675	375.477	354.095
472.848	467.515	462.185	462.075	456.743	451.251	446.043	440.81	440.604	435.383	430.118	429.883	429.621	424.355	424.109	418.98	413.748	408.24	408.501	408.271	408.045	402.752	397.561	397.309	392.132	386.913	386.764	386.538	381.162	375.96	354.552
473.46	468.121	462.784	462.673	457.334	451.833	446.621	441.385	441.175	435.949	430.679	430.44	430.173	424.902	424.651	419.52	414.284	408.766	409.032	408.797	408.568	403.269	398.075	397.818	392.638	387.415	387.263	387.033	381.65	376.444	355.01
474.072	468.727	463.384	463.271	457.926	452.416	447.2	441.959	441.745	436.515	431.24	430.997	430.725	425.449	425.194	420.06	414.82	409.293	409.564	409.324	409.091	403.786	398.588	398.327	393.144	387.916	387.761	387.527	382.137	376.928	355.468
474.684	469.333	463.984	463.868	458.517	452.998	447.778	442.533	442.315	437.081	431.801	431.554	431.277	425.996	425.736	420.6	415.356	409.819	410.095	409.851	409.613	404.303	399.102	398.836	393.649	388.418	388.26	388.022	382.625	377.412	355.925
475.296	469.939	464.583	464.466	459.108	453.58	448.357	443.107	442.885	437.647	432.362	432.111	431.829	426.542	426.279	421.14	415.891	410.345	410.626	410.378	410.136	404.82	399.615	399.345	394.155	388.919	388.759	388.516	383.112	377.895	356.383
475.908	470.544	465.183	465.063	459.7	454.162	448.935	443.681	443.455	438.213	432.923	432.667	432.381	427.089	426.821	421.68	416.427	410.871	411.157	410.904	410.658	405.337	400.129	399.854	394.66	389.42	389.257	389.01	383.6	378.379	356.84
476.52	471.15	465.782	465.661	460.291	454.744	449.513	444.255	444.025	438.779	433.484	433.224	432.933	427.636	427.363	422.219	416.962	411.397	411.687	411.431	411.181	405.854	400.642	400.362	395.165	389.922	389.756	389.505	384.087	378.863	357.297
477.131	471.755	466.381	466.258	460.882	455.326	450.091	444.828	444.595	439.345	434.045	433.78	433.484	428.183	427.905	422.759	417.498	411.923	412.218	411.957	411.703	406.371	401.155	400.871	395.671	390.423	390.254	389.999	384.574	379.346	357.755
477.743	472.361	466.981	466.855	461.473	455.908	450.669	445.402	445.165	439.91	434.606	434.337	434.036	428.729	428.447	423.299	418.033	412.449	412.749	412.484	412.225	406.888	401.669	401.38	396.176	390.924	390.753	390.493	385.062	379.83	358.212
478.354	472.966	467.58	467.452	462.064	456.49	451.247	445.976	445.735	440.476	435.167	434.893	434.587	429.276	428.989	423.838	418.568	412.975	413.28	413.01	412.747	407.405	402.182	401.888	396.681	391.425	391.251	390.987	385.549	380.313	358.669
478.966	473.571	468.179	468.049	462.655	457.072	451.825	446.549	446.305	441.042	435.727	435.45	435.139	429.822	429.531	424.378	419.103	413.5	413.81	413.537	413.27	407.922	402.695	402.397	397.186	391.926	391.749	391.481	386.036	380.796	359.126
479.577	474.177	468.778	468.647	463.246	457.653	452.403	447.123	446.874	441.607	436.288	436.006	435.69	430.369	430.073	424.917	419.639	414.026	414.341	414.063	413.792	408.438	403.208	402.905	397.692	392.427	392.248	391.976	386.523	381.28	359.583
480.189	474.782	469.377	469.243	463.837	458.235	452.981	447.696	447.444	442.173	436.849	436.562	436.242	430.915	430.615	425.457	420.174	414.552	414.871	414.589	414.314	408.955	403.721	403.413	398.197	392.928	392.746	392.47	387.01	381.763	360.041
480.8	475.387	469.976	469.84	464.427	458.817	453.558	448.27	448.014	442.738	437.409	437.118	436.793	431.462	431.157	425.996	420.709	415.077	415.402	415.115	414.836	409.471	404.234	403.922	398.702	393.429	393.244	392.963	387.497	382.246	360.498
481.411	475.992	470.575	470.437	465.018	459.398	454.136	448.843	448.583	443.304	437.97	437.674	437.344	432.008	431.698	426.535	421.244	415.603	415.932	415.641	415.358	409.988	404.747	404.43	399.207	393.93	393.742	393.457	387.984	382.729	360.955
482.022	476.597	471.174	471.034	465.609	459.98	454.714	449.416	449.153	443.869	438.53	438.23	437.895	432.554	432.24	427.075	421.779	416.128	416.463	416.167	415.88	410.504	405.26	404.938	399.712	394.431	394.24	393.951	388.471	383.213	361.412
482.633	477.202	471.773	471.631	466.199	460.561	455.291	449.989	449.722	444.434	439.09	438.786	438.447	433.1	432.782	427.614	422.314	416.654	416.993	416.693	416.401	411.021	405.773	405.446	400.216	394.932	394.738	394.445	388.958	383.696	361.868
483.244	477.807	472.371	472.227	466.79	461.142	455.869	450.563	450.291	444.999	439.651	439.342	438.998	433.646	433.323	428.153	422.848	417.179	417.523	417.219	416.923	411.537	406.286	405.954	400.721	395.433	395.236	394.939	389.444	384.179	362.325
483.855	478.411	472.97	472.824	467.38	461.724	456.446	451.136	450.861	445.564	440.211	439.898	439.549	434.192	433.865	428.692	423.383	417.705	418.053	417.745	417.445	412.053	406.798	406.462	401.226	395.933	395.734	395.433	389.931	384.662	362.782
484.466	479.016	473.568	473.421	467.97	462.305	457.023	451.709	451.43	446.13	440.771	440.454	440.1	434.738	434.406	429.231	423.918	418.23	418.583	418.271	417.966	412.569	407.311	406.97	401.731	396.434	396.232	395.926	390.418	385.145	363.239
485.077	479.621	474.167	474.017	468.561	462.886	457.601	452.282	451.999	446.695	441.331	441.01	440.65	435.284	434.947	429.77	424.453	418.755	419.114	418.797	418.488	413.086	407.824	407.478	402.235	396.934	396.73	396.42	390.904	385.627	363.696
485.688	480.225	474.765	474.613	469.151	463.467	458.178	452.855	452.568	447.26	441.891	441.565	441.201	435.83	435.489	430.309	424.987	419.28	419.644	419.323	419.01	413.602	408.336	407.986	402.74	397.435	397.227	396.913	391.391	386.11	364.152
486.298	480.83	475.364	475.21	469.741	464.048	458.755	453.427	453.137	447.824	442.451	442.121	441.752	436.376	436.03	430.848	425.522	419.805	420.174	419.848	419.531	414.118	408.849	408.494	403.244	397.935	397.725	397.407	391.877	386.593	364.609
486.909	481.434	475.962	475.806	470.331	464.629	459.332	454	453.706	448.389	443.011	442.677	442.303	436.922	436.571	431.387	426.056	420.33	420.703	420.374	420.053	414.634	409.361	409.002	403.749	398.436	398.223	397.9	392.364	387.076	365.065
487.52	482.038	476.56	476.402	470.921	465.21	459.909	454.573	454.275	448.954	443.571	443.232	442.853	437.467	437.112	431.925	426.591	420.855	421.233	420.9	420.574	415.15	409.873	409.51	404.253	398.936	398.72	398.394	392.85	387.558	365.522
488.13	482.643	477.158	476.998	471.511	465.791	460.486	455.146	454.844	449.519	444.131	443.788	443.404	438.013	437.653	432.464	427.125	421.38	421.763	421.425	421.095	415.665	410.386	410.017	404.758	399.437	399.218	398.887	393.337	388.041	365.978
488.74	483.247	477.756	477.594	472.101	466.372	461.063	455.718	455.412	450.083	444.69	444.343	443.954	438.559	438.194	433.003	427.659	421.905	422.293	421.95	421.617	416.181	410.898	410.525	405.262	399.937	399.715	399.38	393.823	388.524	366.435
489.351	483.851	478.354	478.19	472.691	466.952	461.64	456.291	455.981	450.648	445.25	444.898	444.505	439.104	438.735	433.541	428.194	422.43	422.822	422.476	422.138	416.697	411.41	411.032	405.766	400.437	400.213	399.873	394.309	389.006	366.891
489.961	484.455	478.952	478.786	473.281	467.533	462.217	456.863	456.55	451.212	445.81	445.454	445.055	439.649	439.276	434.08	428.728	422.955	423.352	423.001	422.659	417.213	411.922	411.54	406.27	400.937	400.71	400.367	394.795	389.489	367.347
490.571	485.059	479.55	479.382	473.87	468.113	462.793	457.436	457.118	451.777	446.369	446.009	445.606	440.195	439.817	434.618	429.262	423.48	423.882	423.526	423.18	417.728	412.435	412.047	406.775	401.437	401.207	400.86	395.282	389.971	367.804
491.181	485.663	480.148	479.978	474.46	468.694	463.37	458.008	457.687	452.341	446.929	446.564	446.156	440.74	440.358	435.156	429.796	424.004	424.411	424.052	423.701	418.244	412.947	412.555	407.279	401.937	401.705	401.353	395.768	390.453	368.26
491.791	486.267	480.746	480.574	475.049	469.274	463.947	458.58	458.255	452.906	447.488	447.119	446.706	441.285	440.898	435.695	430.33	424.529	424.941	424.577	424.222	418.76	413.459	413.062	407.783	402.437	402.202	401.846	396.254	390.936	368.716
492.401	486.871	481.344	481.169	475.639	469.855	464.523	459.152	458.824	453.47	448.047	447.674	447.256	441.831	441.439	436.233	430.864	425.053	425.47	425.102	424.743	419.275	413.971	413.569	408.287	402.937	402.699	402.339	396.74	391.418	369.172
493.011	487.475	481.941	481.765	476.228	470.435	465.1	459.725	459.392	454.034	448.607	448.229	447.806	442.376	441.98	436.771	431.398	425.578	425.999	425.627	425.264	419.791	414.482	414.077	408.791	403.437	403.196	402.832	397.226	391.9	369.628
493.621	488.078	482.539	482.36	476.818	471.015	465.676	460.297	459.96	454.598	449.166	448.784	448.356	442.921	442.52	437.309	431.932	426.102	426.529	426.152	425.785	420.306	414.994	414.584	409.295	403.937	403.693	403.325	397.712	392.382	370.084
494.231	488.682	483.136	482.956	477.407	471.596	466.252	460.869	460.529	455.162	449.725	449.339	448.906	443.466	443.061	437.848	432.466	426.627	427.058	426.677	426.305	420.821	415.506	415.091	409.798	404.437	404.19	403.817	398.197	392.864	370.54
494.841	489.286	483.734	483.551	477.996	472.176	466.829	461.441	461.097	455.726	450.284	449.894	449.456	444.011	443.601	438.386	432.999	427.151	427.587	427.202	426.826	421.336	416.018	415.598	410.302	404.936	404.687	404.31	398.683	393.346	370.996
495.45	489.889	484.331	484.147	478.585	472.756	467.405	462.013	461.665	456.29	450.843	450.448	450.006	444.556	444.142	438.924	433.533	427.675	428.116	427.727	427.347	421.852	416.529	416.105	410.806	405.436	405.184	404.803	399.169	393.828	371.452
496.06	490.492	484.928	484.742	479.175	473.336	467.981	462.584	462.233	456.854	451.402	451.003	450.556	445.101	444.682	439.461	434.067	428.199	428.645	428.251	427.867	422.367	417.041	416.612	411.31	405.936	405.681	405.296	399.655	394.31	371.908
496.669	491.096	485.526	485.337	479.764	473.916	468.557	463.156	462.801	457.418	451.961	451.558	451.106	445.646	445.222	439.999	434.6	428.724	429.174	428.776	428.388	422.882	417.553	417.119	411.813	406.435	406.178	405.788	400.14	394.792	372.364
497.279	491.699	486.123	485.932	480.353	474.496	469.133	463.728	463.369	457.982	452.52	452.112	451.655	446.19	445.762	440.537	435.134	429.248	429.703	429.301	428.908	423.397	418.064	417.626	412.317	406.935	406.674	406.281	400.626	395.274	372.82
497.888	492.302	486.72	486.527	480.942	475.075	469.709	464.3	463.936	458.546	453.079	452.667	452.205	446.735	446.302	441.075	435.667	429.772	430.232	429.825	429.429	423.912	418.576	418.132	412.82	407.434	407.171	406.773	401.111	395.756	373.275
498.498	492.906	487.317	487.122	481.53	475.655	470.285	464.871	464.504	459.109	453.638	453.221	452.755	447.28	446.843	441.613	436.201	430.296	430.761	430.35	429.949	424.427	419.087	418.639	413.324	407.934	407.668	407.266	401.597	396.238	373.731
499.107	493.509	487.914	487.717	482.119	476.235	470.861	465.443	465.072	459.673	454.196	453.775	453.304	447.824	447.383	442.15	436.734	430.82	431.29	430.875	430.47	424.942	419.598	419.146	413.827	408.433	408.164	407.758	402.082	396.719	374.187
499.716	494.112	488.511	488.312	482.708	476.814	471.437	466.014	465.64	460.237	454.755	454.33	453.854	448.369	447.923	442.688	437.267	431.343	431.818	431.399	430.99	425.457	420.11	419.653	414.331	408.932	408.661	408.25	402.568	397.201	374.642
500.325	494.715	489.108	488.907	483.297	477.394	472.012	466.586	466.207	460.8	455.314	454.884	454.403	448.913	448.462	443.225	437.801	431.867	432.347	431.923	431.51	425.972	420.621	420.159	414.834	409.431	409.157	408.743	403.053	397.683	375.098
500.934	495.317	489.704	489.502	483.885	477.973	472.588	467.157	466.775	461.363	455.872	455.438	454.952	449.458	449.002	443.763	438.334	432.391	432.876	432.448	432.03	426.486	421.132	420.666	415.337	409.931	409.654	409.235	403.538	398.164	375.553
501.543	495.92	490.301	490.096	484.474	478.553	473.163	467.728	467.342	461.927	456.431	455.992	455.502	450.002	449.542	444.3	438.867	432.915	433.404	432.972	432.55	427.001	421.643	421.172	415.84	410.43	410.15	409.727	404.024	398.646	376.009
502.152	496.523	490.898	490.691	485.062	479.132	473.739	468.299	467.91	462.49	456.989	456.546	456.051	450.546	450.082	444.837	439.4	433.438	433.933	433.496	433.07	427.516	422.154	421.679	416.343	410.929	410.646	410.219	404.509	399.127	376.464
502.761	497.126	491.494	491.286	485.651	479.712	474.314	468.871	468.477	463.053	457.547	457.1	456.6	451.09	450.621	445.375	439.933	433.962	434.461	434.02	433.59	428.03	422.665	422.185	416.847	411.428	411.143	410.711	404.994	399.609	376.919
503.37	497.728	492.091	491.88	486.239	480.291	474.89	469.442	469.044	463.617	458.106	457.654	457.149	451.635	451.161	445.912	440.466	434.486	434.989	434.544	434.11	428.545	423.176	422.691	417.35	411.927	411.639	411.203	405.479	400.09	377.375
503.978	498.331	492.687	492.475	486.827	480.87	475.465	470.013	469.611	464.18	458.664	458.208	457.698	452.179	451.701	446.449	440.999	435.009	435.518	435.068	434.63	429.059	423.687	423.198	417.853	412.426	412.135	411.695	405.964	400.571	377.83
504.587	498.933	493.284	493.069	487.415	481.449	476.04	470.584	470.179	464.743	459.222	458.762	458.247	452.723	452.24	446.986	441.532	435.532	436.046	435.592	435.15	429.573	424.198	423.704	418.355	412.925	412.631	412.187	406.449	401.052	378.285
505.196	499.536	493.88	493.663	488.004	482.028	476.616	471.155	470.746	465.306	459.78	459.316	458.796	453.267	452.78	447.523	442.064	436.056	436.574	436.116	435.67	430.088	424.709	424.21	418.858	413.424	413.127	412.679	406.934	401.534	378.74
505.804	500.138	494.476	494.257	488.592	482.607	477.191	471.725	471.313	465.869	460.338	459.869	459.345	453.811	453.319	448.06	442.597	436.579	437.102	436.64	436.19	430.602	425.22	424.716	419.361	413.922	413.623	413.171	407.419	402.015	379.195
506.413	500.741	495.072	494.852	489.18	483.186	477.766	472.296	471.88	466.432	460.896	460.423	459.894	454.354	453.858	448.597	443.13	437.102	437.63	437.164	436.709	431.116	425.73	425.222	419.864	414.421	414.119	413.663	407.904	402.496	379.65
507.021	501.343	495.668	495.446	489.768	483.765	478.341	472.867	472.447	466.994	461.454	460.977	460.442	454.898	454.398	449.134	443.662	437.626	438.158	437.688	437.229	431.631	426.241	425.728	420.367	414.92	414.615	414.155	408.388	402.977	380.105
507.629	501.945	496.265	496.04	490.355	484.344	478.916	473.438	473.014	467.557	462.012	461.53	460.991	455.442	454.937	449.671	444.195	438.149	438.686	438.212	437.748	432.145	426.752	426.234	420.869	415.418	415.111	414.646	408.873	403.458	380.56
508.238	502.547	496.86	496.634	490.943	484.922	479.491	474.008	473.58	468.12	462.57	462.084	461.54	455.986	455.476	450.208	444.727	438.672	439.214	438.735	438.268	432.659	427.262	426.74	421.372	415.917	415.607	415.138	409.358	403.939	381.015
508.846	503.149	497.456	497.228	491.531	485.501	480.066	474.579	474.147	468.682	463.127	462.637	462.088	456.529	456.015	450.744	445.26	439.195	439.742	439.259	438.787	433.173	427.773	427.246	421.875	416.415	416.103	415.63	409.843	404.42	381.47
509.454	503.751	498.052	497.821	492.119	486.08	480.64	475.149	474.714	469.245	463.685	463.19	462.637	457.073	456.554	451.281	445.792	439.718	440.27	439.782	439.307	433.687	428.283	427.752	422.377	416.914	416.598	416.121	410.327	404.901	381.925
510.062	504.353	498.648	498.415	492.706	486.658	481.215	475.72	475.28	469.807	464.243	463.744	463.185	457.617	457.093	451.818	446.325	440.241	440.798	440.306	439.826	434.201	428.794	428.257	422.88	417.412	417.094	416.613	410.812	405.381	382.38
510.67	504.955	499.244	499.009	493.294	487.237	481.79	476.29	475.847	470.37	464.8	464.297	463.734	458.16	457.632	452.354	446.857	440.764	441.325	440.829	440.345	434.714	429.304	428.763	423.382	417.911	417.589	417.104	411.296	405.862	382.834
511.278	505.557	499.839	499.603	493.881	487.815	482.364	476.86	476.413	470.932	465.358	464.85	464.282	458.703	458.171	452.891	447.389	441.287	441.853	441.353	440.865	435.228	429.814	429.269	423.884	418.409	418.085	417.595	411.781	406.343	383.289
511.886	506.158	500.435	500.196	494.469	488.394	482.939	477.43	476.98	471.495	465.915	465.403	464.83	459.247	458.71	453.427	447.921	441.809	442.381	441.876	441.384	435.742	430.324	429.774	424.387	418.907	418.581	418.087	412.265	406.824	383.744
512.493	506.76	501.031	500.79	495.056	488.972	483.513	478.001	477.546	472.057	466.473	465.956	465.379	459.79	459.248	453.964	448.453	442.332	442.908	442.399	441.903	436.256	430.835	430.28	424.889	419.405	419.076	418.578	412.749	407.304	384.198
513.101	507.361	501.626	501.383	495.644	489.55	484.088	478.571	478.112	472.619	467.03	466.509	465.927	460.333	459.787	454.5	448.985	442.855	443.436	442.923	442.422	436.769	431.345	430.785	425.391	419.904	419.571	419.069	413.234	407.785	384.653
513.709	507.963	502.221	501.976	496.231	490.128	484.662	479.141	478.679	473.181	467.587	467.062	466.475	460.876	460.326	455.036	449.517	443.377	443.963	443.446	442.941	437.283	431.855	431.291	425.893	420.402	420.067	419.56	413.718	408.265	385.107
514.316	508.564	502.817	502.57	496.818	490.706	485.236	479.711	479.245	473.743	468.144	467.615	467.023	461.42	460.864	455.572	450.049	443.9	444.491	443.969	443.46	437.797	432.365	431.796	426.395	420.9	420.562	420.051	414.202	408.746	385.562
514.924	509.166	503.412	503.163	497.405	491.284	485.811	480.281	479.811	474.305	468.702	468.168	467.571	461.963	461.403	456.108	450.581	444.422	445.018	444.492	443.979	438.31	432.875	432.301	426.897	421.398	421.057	420.542	414.686	409.226	386.016
515.531	509.767	504.007	503.756	497.992	491.862	486.385	480.851	480.377	474.867	469.259	468.721	468.119	462.506	461.941	456.645	451.113	444.945	445.545	445.015	444.498	438.823	433.385	432.806	427.399	421.896	421.552	421.033	415.17	409.706	386.47
516.139	510.368	504.602	504.349	498.579	492.44	486.959	481.42	480.943	475.429	469.816	469.273	468.667	463.049	462.48	457.181	451.645	445.467	446.072	445.538	445.016	439.337	433.894	433.312	427.901	422.394	422.048	421.524	415.654	410.187	386.925
516.746	510.97	505.198	504.942	499.166	493.018	487.533	481.99	481.509	475.991	470.373	469.826	469.214	463.591	463.018	457.717	452.176	445.989	446.599	446.061	445.535	439.85	434.404	433.817	428.403	422.891	422.543	422.015	416.138	410.667	387.379
517.353	511.571	505.793	505.535	499.753	493.596	488.107	482.56	482.075	476.553	470.93	470.379	469.762	464.134	463.556	458.252	452.708	446.512	447.127	446.584	446.054	440.363	434.914	434.322	428.905	423.389	423.038	422.506	416.622	411.147	387.833
517.96	512.172	506.387	506.128	500.34	494.174	488.681	483.129	482.641	477.115	471.486	470.931	470.31	464.677	464.095	458.788	453.24	447.034	447.654	447.106	446.572	440.877	435.424	434.827	429.407	423.887	423.533	422.997	417.106	411.627	388.287
518.568	512.773	506.982	506.721	500.927	494.751	489.255	483.699	483.206	477.676	472.043	471.484	470.858	465.22	464.633	459.324	453.771	447.556	448.181	447.629	447.091	441.39	435.933	435.332	429.908	424.385	424.028	423.488	417.59	412.107	388.742
519.175	513.374	507.577	507.314	501.513	495.329	489.828	484.268	483.772	478.238	472.6	472.036	471.405	465.762	465.171	459.86	454.303	448.078	448.707	448.152	447.61	441.903	436.443	435.837	430.41	424.882	424.522	423.979	418.074	412.588	389.196
519.782	513.974	508.172	507.907	502.1	495.907	490.402	484.838	484.338	478.799	473.157	472.588	471.953	466.305	465.709	460.396	454.834	448.6	449.234	448.674	448.128	442.416	436.952	436.342	430.912	425.38	425.017	424.469	418.557	413.068	389.65
520.388	514.575	508.767	508.499	502.686	496.484	490.976	485.407	484.903	479.361	473.713	473.141	472.5	466.848	466.247	460.931	455.365	449.122	449.761	449.197	448.646	442.929	437.462	436.847	431.413	425.877	425.512	424.96	419.041	413.547	390.104
520.995	515.176	509.361	509.092	503.273	497.062	491.549	485.977	485.469	479.922	474.27	473.693	473.048	467.39	466.785	461.467	455.897	449.644	450.288	449.719	449.165	443.442	437.971	437.351	431.915	426.375	426.007	425.45	419.525	414.027	390.558
521.602	515.777	509.956	509.685	503.859	497.639	492.123	486.546	486.034	480.484	474.826	474.245	473.595	467.932	467.323	462.002	456.428	450.166	450.815	450.242	449.683	443.955	438.481	437.856	432.416	426.872	426.501	425.941	420.008	414.507	391.011
522.209	516.377	510.55	510.277	504.446	498.216	492.696	487.115	486.6	481.045	475.383	474.797	474.142	468.475	467.861	462.538	456.959	450.688	451.341	450.764	450.201	444.468	438.99	438.361	432.918	427.37	426.996	426.431	420.492	414.987	391.465
522.815	516.978	511.145	510.87	505.032	498.793	493.27	487.684	487.165	481.606	475.939	475.349	474.689	469.017	468.399	463.073	457.49	451.21	451.868	451.287	450.719	444.98	439.499	438.865	433.419	427.867	427.491	426.922	420.975	415.467	391.919
523.422	517.578	511.739	511.462	505.618	499.371	493.843	488.253	487.73	482.168	476.495	475.901	475.237	469.559	468.936	463.609	458.021	451.731	452.394	451.809	451.238	445.493	440.009	439.37	433.92	428.364	427.985	427.412	421.459	415.947	392.373
524.029	518.179	512.333	512.054	506.204	499.948	494.416	488.822	488.296	482.729	477.052	476.453	475.784	470.102	469.474	464.144	458.552	452.253	452.921	452.331	451.756	446.006	440.518	439.875	434.422	428.861	428.48	427.902	421.942	416.426	392.827
524.635	518.779	512.928	512.646	506.79	500.525	494.99	489.391	488.861	483.29	477.608	477.005	476.331	470.644	470.012	464.679	459.083	452.775	453.447	452.853	452.274	446.518	441.027	440.379	434.923	429.359	428.974	428.393	422.425	416.906	393.28
525.241	519.379	513.522	513.239	507.377	501.102	495.563	489.96	489.426	483.851	478.164	477.557	476.878	471.186	470.549	465.214	459.614	453.296	453.974	453.375	452.792	447.031	441.536	440.883	435.424	429.856	429.468	428.883	422.909	417.385	393.734
525.848	519.979	514.116	513.831	507.963	501.679	496.136	490.529	489.991	484.412	478.72	478.109	477.425	471.728	471.087	465.749	460.145	453.818	454.5	453.897	453.31	447.543	442.045	441.388	435.925	430.353	429.963	429.373	423.392	417.865	394.187
526.454	520.579	514.71	514.423	508.548	502.256	496.709	491.098	490.556	484.973	479.276	478.66	477.972	472.27	471.624	466.284	460.676	454.339	455.026	454.419	453.827	448.056	442.554	441.892	436.426	430.85	430.457	429.863	423.875	418.344	394.641
527.06	521.18	515.304	515.015	509.134	502.832	497.282	491.666	491.121	485.533	479.832	479.212	478.518	472.812	472.162	466.819	461.207	454.861	455.552	454.941	454.345	448.568	443.063	442.396	436.927	431.347	430.951	430.353	424.358	418.824	395.094
527.666	521.78	515.898	515.607	509.72	503.409	497.855	492.235	491.686	486.094	480.388	479.763	479.065	473.354	472.699	467.354	461.737	455.382	456.079	455.463	454.863	449.081	443.572	442.901	437.428	431.844	431.445	430.843	424.841	419.303	395.548
528.272	522.379	516.492	516.199	510.306	503.986	498.428	492.804	492.25	486.655	480.944	480.315	479.612	473.895	473.236	467.889	462.268	455.903	456.605	455.985	455.381	449.593	444.08	443.405	437.929	432.34	431.939	431.333	425.324	419.782	396.001
528.878	522.979	517.086	516.79	510.891	504.563	499	493.372	492.815	487.216	481.499	480.866	480.158	474.437	473.773	468.424	462.799	456.424	457.131	456.507	455.898	450.105	444.589	443.909	438.43	432.837	432.433	431.823	425.807	420.262	396.455
529.484	523.579	517.679	517.382	511.477	505.139	499.573	493.941	493.38	487.776	482.055	481.418	480.705	474.979	474.311	468.959	463.329	456.946	457.657	457.029	456.416	450.617	445.098	444.413	438.931	433.334	432.927	432.313	426.29	420.741	396.908
530.09	524.179	518.273	517.974	512.063	505.716	500.146	494.509	493.944	488.337	482.611	481.969	481.252	475.52	474.848	469.494	463.86	457.467	458.183	457.55	456.934	451.13	445.606	444.917	439.431	433.831	433.421	432.803	426.773	421.22	397.361
530.696	524.779	518.867	518.565	512.648	506.292	500.719	495.077	494.509	488.897	483.166	482.521	481.798	476.062	475.385	470.028	464.39	457.988	458.708	458.072	457.451	451.642	446.115	445.421	439.932	434.327	433.915	433.292	427.256	421.699	397.814
531.302	525.378	519.46	519.157	513.234	506.868	501.291	495.646	495.073	489.458	483.722	483.072	482.344	476.603	475.922	470.563	464.92	458.509	459.234	458.594	457.968	452.154	446.623	445.925	440.433	434.824	434.409	433.782	427.739	422.178	398.267
531.907	525.978	520.054	519.748	513.819	507.445	501.864	496.214	495.638	490.018	484.277	483.623	482.891	477.145	476.459	471.098	465.451	459.03	459.76	459.115	458.486	452.666	447.132	446.429	440.933	435.321	434.903	434.272	428.221	422.657	398.721
532.513	526.577	520.647	520.34	514.404	508.021	502.436	496.782	496.202	490.578	484.833	484.174	483.437	477.686	476.996	471.632	465.981	459.551	460.286	459.637	459.003	453.178	447.64	446.932	441.434	435.817	435.397	434.761	428.704	423.136	399.174
533.118	527.177	521.24	520.931	514.989	508.597	503.008	497.35	496.767	491.138	485.388	484.725	483.983	478.228	477.532	472.166	466.511	460.072	460.811	460.158	459.52	453.69	448.149	447.436	441.934	436.313	435.89	435.251	429.187	423.615	399.627
533.724	527.776	521.834	521.522	515.575	509.173	503.581	497.918	497.331	491.699	485.943	485.276	484.53	478.769	478.069	472.701	467.041	460.592	461.337	460.679	460.038	454.201	448.657	447.94	442.435	436.81	436.384	435.74	429.669	424.094	400.08
534.329	528.375	522.427	522.113	516.16	509.749	504.153	498.486	497.895	492.259	486.499	485.827	485.076	479.31	478.606	473.235	467.571	461.113	461.863	461.201	460.555	454.713	449.165	448.443	442.935	437.306	436.878	436.23	430.152	424.573	400.533
534.935	528.975	523.02	522.705	516.745	510.325	504.725	499.054	498.459	492.819	487.054	486.378	485.622	479.851	479.143	473.769	468.101	461.634	462.388	461.722	461.072	455.225	449.674	448.947	443.435	437.803	437.371	436.719	430.634	425.052	400.985
535.54	529.574	523.613	523.296	517.33	510.901	505.297	499.622	499.023	493.379	487.609	486.929	486.168	480.392	479.679	474.304	468.631	462.154	462.914	462.243	461.589	455.736	450.182	449.451	443.936	438.299	437.865	437.209	431.117	425.53	401.438
536.145	530.173	524.206	523.887	517.915	511.477	505.869	500.19	499.587	493.939	488.164	487.48	486.714	480.934	480.216	474.838	469.161	462.675	463.439	462.764	462.106	456.248	450.69	449.954	444.436	438.795	438.358	437.698	431.599	426.009	401.891
536.75	530.772	524.799	524.478	518.499	512.053	506.441	500.757	500.151	494.499	488.719	488.03	487.26	481.475	480.752	475.372	469.691	463.195	463.964	463.285	462.623	456.76	451.198	450.457	444.936	439.291	438.852	438.187	432.082	426.488	402.344
537.355	531.371	525.392	525.069	519.084	512.629	507.013	501.325	500.715	495.058	489.274	488.581	487.806	482.015	481.289	475.906	470.221	463.716	464.489	463.806	463.14	457.271	451.706	450.961	445.436	439.787	439.345	438.676	432.564	426.966	402.797
537.96	531.97	525.985	525.659	519.669	513.204	507.585	501.893	501.279	495.618	489.829	489.132	488.351	482.556	481.825	476.44	470.751	464.236	465.015	464.327	463.657	457.783	452.214	451.464	445.936	440.283	439.838	439.165	433.046	427.445	403.249
538.565	532.569	526.578	526.25	520.254	513.78	508.157	502.46	501.843	496.178	490.384	489.682	488.897	483.097	482.361	476.974	471.281	464.757	465.54	464.848	464.173	458.294	452.722	451.967	446.436	440.779	440.332	439.655	433.528	427.923	403.702
539.17	533.167	527.17	526.841	520.838	514.356	508.729	503.028	502.406	496.738	490.939	490.233	489.443	483.638	482.898	477.508	471.81	465.277	466.065	465.369	464.69	458.805	453.229	452.471	446.936	441.275	440.825	440.144	434.01	428.402	404.154
539.775	533.766	527.763	527.432	521.423	514.931	509.3	503.595	502.97	497.297	491.493	490.783	489.988	484.179	483.434	478.042	472.34	465.797	466.59	465.89	465.207	459.317	453.737	452.974	447.436	441.771	441.318	440.633	434.493	428.88	404.607
540.38	534.365	528.356	528.022	522.007	515.507	509.872	504.163	503.534	497.857	492.048	491.333	490.534	484.719	483.97	478.576	472.869	466.318	467.115	466.411	465.724	459.828	454.245	453.477	447.936	442.267	441.811	441.122	434.975	429.358	405.059
540.984	534.963	528.948	528.613	522.592	516.082	510.444	504.73	504.097	498.416	492.603	491.884	491.079	485.26	484.506	479.109	473.399	466.838	467.64	466.931	466.24	460.339	454.753	453.98	448.436	442.763	442.304	441.61	435.457	429.837	405.512
541.589	535.562	529.541	529.203	523.176	516.657	511.015	505.297	504.661	498.975	493.157	492.434	491.625	485.801	485.042	479.643	473.928	467.358	468.165	467.452	466.757	460.85	455.26	454.483	448.936	443.258	442.797	442.099	435.939	430.315	405.964
542.194	536.16	530.133	529.793	523.76	517.233	511.587	505.864	505.224	499.535	493.712	492.984	492.17	486.341	485.578	480.177	474.458	467.878	468.69	467.973	467.273	461.361	455.768	454.986	449.435	443.754	443.29	442.588	436.42	430.793	406.416
542.798	536.759	530.725	530.384	524.345	517.808	512.158	506.431	505.787	500.094	494.266	493.534	492.716	486.881	486.114	480.71	474.987	468.398	469.214	468.493	467.79	461.872	456.275	455.489	449.935	444.25	443.783	443.077	436.902	431.271	406.869
543.403	537.357	531.318	530.974	524.929	518.383	512.729	506.999	506.351	500.653	494.82	494.084	493.261	487.422	486.65	481.244	475.516	468.918	469.739	469.014	468.306	462.383	456.783	455.992	450.435	444.745	444.276	443.566	437.384	431.749	407.321
544.007	537.955	531.91	531.564	525.513	518.958	513.301	507.566	506.914	501.213	495.375	494.634	493.806	487.962	487.186	481.777	476.045	469.438	470.264	469.534	468.822	462.894	457.29	456.495	450.934	445.241	444.768	444.054	437.866	432.228	407.773
544.611	538.553	532.502	532.154	526.097	519.533	513.872	508.133	507.477	501.772	495.929	495.184	494.351	488.502	487.721	482.31	476.575	469.957	470.789	470.055	469.338	463.405	457.798	456.997	451.434	445.736	445.261	444.543	438.348	432.706	408.225
545.215	539.152	533.094	532.744	526.681	520.108	514.443	508.699	508.04	502.331	496.483	495.734	494.896	489.043	488.257	482.844	477.104	470.477	471.313	470.575	469.855	463.916	458.305	457.5	451.933	446.232	445.754	445.031	438.829	433.183	408.677
545.82	539.75	533.686	533.334	527.265	520.683	515.014	509.266	508.603	502.89	497.037	496.284	495.441	489.583	488.793	483.377	477.633	470.997	471.838	471.095	470.371	464.427	458.812	458.003	452.432	446.727	446.247	445.52	439.311	433.661	409.13
546.424	540.348	534.278	533.924	527.849	521.258	515.585	509.833	509.166	503.449	497.591	496.834	495.986	490.123	489.328	483.91	478.162	471.517	472.362	471.615	470.887	464.937	459.32	458.505	452.932	447.222	446.739	446.008	439.792	434.139	409.582
547.028	540.946	534.87	534.514	528.432	521.833	516.156	510.4	509.729	504.008	498.145	497.384	496.531	490.663	489.864	484.443	478.691	472.036	472.886	472.136	471.403	465.448	459.827	459.008	453.431	447.718	447.232	446.497	440.274	434.617	410.034
547.632	541.544	535.462	535.104	529.016	522.407	516.727	510.966	510.292	504.566	498.699	497.933	497.076	491.203	490.399	484.977	479.219	472.556	473.411	472.656	471.919	465.959	460.334	459.51	453.93	448.213	447.724	446.985	440.755	435.095	410.485
548.236	542.141	536.053	535.694	529.6	522.982	517.298	511.533	510.855	505.125	499.253	498.483	497.621	491.743	490.935	485.51	479.748	473.075	473.935	473.176	472.435	466.469	460.841	460.013	454.43	448.708	448.217	447.473	441.237	435.573	410.937
548.839	542.739	536.645	536.284	530.183	523.557	517.869	512.1	511.418	505.684	499.807	499.032	498.166	492.283	491.47	486.043	480.277	473.595	474.459	473.696	472.951	466.98	461.348	460.515	454.929	449.203	448.709	447.962	441.718	436.05	411.389
549.443	543.337	537.237	536.873	530.767	524.131	518.439	512.666	511.98	506.242	500.361	499.582	498.71	492.823	492.006	486.576	480.806	474.114	474.984	474.216	473.467	467.49	461.855	461.018	455.428	449.698	449.201	448.45	442.199	436.528	411.841
550.047	543.934	537.828	537.463	531.35	524.706	519.01	513.232	512.543	506.801	500.915	500.131	499.255	493.362	492.541	487.109	481.334	474.633	475.508	474.736	473.982	468.001	462.362	461.52	455.927	450.193	449.694	448.938	442.681	437.005	412.293
550.651	544.532	538.42	538.052	531.934	525.28	519.581	513.799	513.106	507.36	501.468	500.681	499.8	493.902	493.076	487.641	481.863	475.153	476.032	475.255	474.498	468.511	462.869	462.022	456.426	450.688	450.186	449.426	443.162	437.483	412.744
551.254	545.129	539.011	538.642	532.517	525.855	520.151	514.365	513.668	507.918	502.022	501.23	500.344	494.442	493.611	488.174	482.392	475.672	476.556	475.775	475.014	469.021	463.375	462.524	456.925	451.183	450.678	449.914	443.643	437.96	413.196
551.858	545.727	539.603	539.231	533.101	526.429	520.722	514.931	514.231	508.476	502.576	501.779	500.889	494.981	494.146	488.707	482.92	476.191	477.08	476.295	475.529	469.532	463.882	463.026	457.424	451.678	451.17	450.402	444.124	438.438	413.648
552.461	546.324	540.194	539.821	533.684	527.003	521.292	515.498	514.793	509.035	503.129	502.329	501.433	495.521	494.681	489.24	483.449	476.71	477.604	476.815	476.045	470.042	464.389	463.528	457.923	452.173	451.662	450.89	444.605	438.915	414.099
553.065	546.922	540.785	540.41	534.267	527.577	521.863	516.064	515.355	509.593	503.683	502.878	501.978	496.06	495.216	489.772	483.977	477.229	478.127	477.334	476.56	470.552	464.895	464.031	458.421	452.668	452.154	451.378	445.086	439.392	414.551
553.668	547.519	541.376	540.999	534.85	528.151	522.433	516.63	515.918	510.151	504.236	503.427	502.522	496.6	495.751	490.305	484.505	477.748	478.651	477.854	477.076	471.062	465.402	464.533	458.92	453.163	452.646	451.866	445.567	439.87	415.002
554.271	548.116	541.968	541.588	535.433	528.725	523.003	517.196	516.48	510.71	504.789	503.976	503.066	497.139	496.286	490.837	485.034	478.267	479.175	478.373	477.591	471.572	465.909	465.034	459.419	453.657	453.138	452.354	446.048	440.347	415.454
554.874	548.713	542.559	542.177	536.016	529.299	523.573	517.762	517.042	511.268	505.343	504.525	503.61	497.678	496.821	491.37	485.562	478.786	479.699	478.893	478.107	472.082	466.415	465.536	459.917	454.152	453.63	452.841	446.529	440.824	415.905
555.477	549.31	543.15	542.766	536.599	529.873	524.144	518.328	517.604	511.826	505.896	505.074	504.154	498.218	497.356	491.902	486.09	479.305	480.222	479.412	478.622	472.592	466.922	466.038	460.416	454.646	454.122	453.329	447.01	441.301	416.356
556.081	549.907	543.741	543.355	537.182	530.447	524.714	518.893	518.166	512.384	506.449	505.623	504.699	498.757	497.89	492.434	486.618	479.824	480.746	479.932	479.137	473.102	467.428	466.54	460.915	455.141	454.614	453.817	447.491	441.778	416.808
556.684	550.504	544.331	543.944	537.765	531.021	525.284	519.459	518.728	512.942	507.002	506.172	505.243	499.296	498.425	492.967	487.146	480.343	481.27	480.451	479.652	473.612	467.934	467.042	461.413	455.635	455.106	454.304	447.971	442.255	417.259
557.287	551.101	544.922	544.533	538.348	531.595	525.854	520.025	519.29	513.5	507.555	506.72	505.787	499.835	498.96	493.499	487.674	480.861	481.793	480.97	480.168	474.121	468.441	467.543	461.912	456.13	455.597	454.792	448.452	442.732	417.71
557.889	551.698	545.513	545.122	538.93	532.169	526.424	520.591	519.852	514.057	508.108	507.269	506.33	500.374	499.494	494.031	488.202	481.38	482.316	481.49	480.683	474.631	468.947	468.045	462.41	456.624	456.089	455.279	448.933	443.209	418.161
558.492	552.295	546.104	545.71	539.513	532.742	526.993	521.156	520.414	514.615	508.661	507.818	506.874	500.913	500.029	494.563	488.73	481.899	482.84	482.009	481.198	475.141	469.453	468.547	462.908	457.119	456.58	455.767	449.413	443.686	418.612
559.095	552.891	546.694	546.299	540.095	533.316	527.563	521.722	520.976	515.173	509.214	508.366	507.418	501.452	500.563	495.095	489.258	482.417	483.363	482.528	481.713	475.65	469.959	469.048	463.407	457.613	457.072	456.254	449.894	444.163	419.064
559.698	553.488	547.285	546.888	540.678	533.889	528.133	522.287	521.538	515.731	509.767	508.915	507.962	501.991	501.098	495.627	489.786	482.936	483.886	483.047	482.228	476.16	470.465	469.55	463.905	458.107	457.564	456.742	450.374	444.64	419.515
560.3	554.084	547.876	547.476	541.26	534.463	528.703	522.853	522.099	516.288	510.319	509.463	508.506	502.53	501.632	496.159	490.313	483.454	484.41	483.566	482.743	476.67	470.971	470.051	464.403	458.601	458.055	457.229	450.855	445.117	419.966
560.903	554.681	548.466	548.065	541.843	535.036	529.272	523.418	522.661	516.846	510.872	510.012	509.049	503.068	502.166	496.691	490.841	483.973	484.933	484.085	483.257	477.179	471.477	470.552	464.901	459.095	458.546	457.716	451.335	445.593	420.417
561.505	555.277	549.056	548.653	542.425	535.61	529.842	523.983	523.222	517.403	511.425	510.56	509.593	503.607	502.7	497.223	491.369	484.491	485.456	484.604	483.772	477.688	471.983	471.054	465.399	459.589	459.038	458.204	451.816	446.07	420.867
562.108	555.874	549.647	549.241	543.007	536.183	530.411	524.549	523.784	517.961	511.977	511.108	510.136	504.146	503.235	497.755	491.896	485.009	485.979	485.123	484.287	478.198	472.489	471.555	465.897	460.084	459.529	458.691	452.296	446.547	421.318
562.71	556.47	550.237	549.83	543.59	536.756	530.981	525.114	524.345	518.518	512.53	511.657	510.68	504.684	503.769	498.287	492.424	485.527	486.502	485.641	484.802	478.707	472.995	472.056	466.395	460.577	460.02	459.178	452.776	447.023	421.769
563.312	557.066	550.827	550.418	544.172	537.329	531.55	525.679	524.907	519.075	513.082	512.205	511.223	505.223	504.303	498.818	492.951	486.046	487.025	486.16	485.316	479.216	473.501	472.557	466.893	461.071	460.511	459.665	453.256	447.5	422.22
563.915	557.662	551.417	551.006	544.754	537.902	532.119	526.244	525.468	519.633	513.635	512.753	511.767	505.761	504.837	499.35	493.479	486.564	487.548	486.679	485.831	479.726	474.006	473.059	467.391	461.565	461.003	460.152	453.736	447.976	422.671
564.517	558.259	552.007	551.594	545.336	538.475	532.689	526.809	526.029	520.19	514.187	513.301	512.31	506.3	505.371	499.882	494.006	487.082	488.071	487.197	486.345	480.235	474.512	473.56	467.889	462.059	461.494	460.639	454.217	448.453	423.121
565.119	558.855	552.597	552.182	545.918	539.048	533.258	527.374	526.59	520.747	514.739	513.849	512.853	506.838	505.905	500.413	494.533	487.6	488.594	487.716	486.86	480.744	475.018	474.061	468.387	462.553	461.985	461.126	454.697	448.929	423.572
565.721	559.451	553.187	552.77	546.5	539.621	533.827	527.939	527.151	521.304	515.292	514.397	513.396	507.377	506.438	500.945	495.061	488.118	489.116	488.234	487.374	481.253	475.523	474.562	468.884	463.047	462.476	461.613	455.177	449.405	424.022
566.323	560.047	553.777	553.358	547.081	540.194	534.396	528.504	527.713	521.861	515.844	514.945	513.939	507.915	506.972	501.476	495.588	488.636	489.639	488.753	487.889	481.762	476.029	475.063	469.382	463.54	462.967	462.1	455.657	449.882	424.473
566.925	560.642	554.367	553.946	547.663	540.767	534.965	529.068	528.274	522.418	516.396	515.493	514.482	508.453	507.506	502.007	496.115	489.154	490.162	489.271	488.403	482.271	476.534	475.563	469.88	464.034	463.458	462.586	456.137	450.358	424.924
567.527	561.238	554.957	554.534	548.245	541.34	535.534	529.633	528.834	522.975	516.948	516.041	515.026	508.991	508.04	502.539	496.642	489.671	490.684	489.79	488.917	482.78	477.04	476.064	470.377	464.528	463.949	463.073	456.616	450.834	425.374
568.129	561.834	555.547	555.121	548.827	541.912	536.103	530.198	529.395	523.532	517.5	516.588	515.568	509.529	508.573	503.07	497.169	490.189	491.207	490.308	489.431	483.289	477.545	476.565	470.875	465.021	464.439	463.56	457.096	451.31	425.824
568.73	562.43	556.136	555.709	549.408	542.485	536.672	530.762	529.956	524.088	518.052	517.136	516.111	510.067	509.107	503.601	497.696	490.707	491.729	490.826	489.946	483.797	478.05	477.066	471.372	465.515	464.93	464.046	457.576	451.786	426.275
569.332	563.025	556.726	556.297	549.99	543.058	537.24	531.327	530.517	524.645	518.604	517.684	516.654	510.605	509.64	504.132	498.223	491.225	492.252	491.345	490.46	484.306	478.556	477.566	471.87	466.008	465.421	464.533	458.056	452.262	426.725
569.934	563.621	557.315	556.884	550.571	543.63	537.809	531.891	531.078	525.202	519.156	518.231	517.197	511.143	510.174	504.664	498.75	491.742	492.774	491.863	490.974	484.815	479.061	478.067	472.367	466.501	465.911	465.02	458.535	452.738	427.175
570.535	564.216	557.905	557.472	551.153	544.203	538.378	532.456	531.638	525.759	519.708	518.779	517.74	511.681	510.707	505.195	499.277	492.26	493.296	492.381	491.488	485.324	479.566	478.568	472.865	466.995	466.402	465.506	459.015	453.214	427.626
571.137	564.812	558.494	558.059	551.734	544.775	538.946	533.02	532.199	526.315	520.259	519.326	518.283	512.219	511.24	505.726	499.803	492.777	493.819	492.899	492.002	485.832	480.071	479.068	473.362	467.488	466.893	465.992	459.495	453.69	428.076
571.738	565.407	559.084	558.646	552.315	545.347	539.515	533.584	532.76	526.872	520.811	519.874	518.825	512.757	511.774	506.256	500.33	493.295	494.341	493.417	492.516	486.341	480.576	479.569	473.859	467.981	467.383	466.479	459.974	454.166	428.526
572.34	566.002	559.673	559.234	552.897	545.92	540.084	534.149	533.32	527.428	521.363	520.421	519.368	513.295	512.307	506.787	500.857	493.812	494.863	493.935	493.029	486.849	481.081	480.069	474.356	468.474	467.874	466.965	460.454	454.642	428.976
572.941	566.598	560.262	559.821	553.478	546.492	540.652	534.713	533.881	527.984	521.914	520.968	519.91	513.832	512.84	507.318	501.383	494.329	495.385	494.453	493.543	487.358	481.586	480.569	474.853	468.968	468.364	467.451	460.933	455.118	429.426
573.542	567.193	560.851	560.408	554.059	547.064	541.22	535.277	534.441	528.541	522.466	521.516	520.453	514.37	513.373	507.849	501.91	494.847	495.907	494.971	494.057	487.866	482.091	481.07	475.351	469.461	468.854	467.938	461.413	455.593	429.876
574.143	567.788	561.44	560.995	554.64	547.636	541.789	535.841	535.001	529.097	523.017	522.063	520.995	514.907	513.906	508.38	502.437	495.364	496.429	495.488	494.571	488.374	482.596	481.57	475.848	469.954	469.345	468.424	461.892	456.069	430.326
574.744	568.383	562.029	561.582	555.221	548.208	542.357	536.405	535.561	529.653	523.569	522.61	521.538	515.445	514.439	508.91	502.963	495.881	496.951	496.006	495.084	488.883	483.101	482.07	476.345	470.447	469.835	468.91	462.371	456.545	430.776
575.345	568.978	562.618	562.169	555.802	548.78	542.925	536.969	536.122	530.21	524.12	523.157	522.08	515.982	514.972	509.441	503.489	496.398	497.473	496.524	495.598	489.391	483.605	482.57	476.841	470.94	470.325	469.396	462.85	457.02	431.226
575.946	569.573	563.207	562.756	556.383	549.352	543.493	537.533	536.682	530.766	524.671	523.704	522.622	516.52	515.505	509.972	504.016	496.915	497.995	497.042	496.111	489.899	484.11	483.071	477.338	471.433	470.815	469.882	463.33	457.496	431.676
576.547	570.168	563.796	563.343	556.964	549.924	544.061	538.097	537.242	531.322	525.222	524.251	523.164	517.057	516.038	510.502	504.542	497.432	498.517	497.559	496.625	490.407	484.615	483.571	477.835	471.925	471.306	470.368	463.809	457.971	432.126
577.148	570.763	564.385	563.93	557.544	550.496	544.629	538.661	537.802	531.878	525.774	524.798	523.706	517.594	516.571	511.033	505.068	497.949	499.038	498.077	497.138	490.915	485.119	484.071	478.332	472.418	471.796	470.854	464.288	458.447	432.575
577.749	571.357	564.974	564.516	558.125	551.067	545.197	539.224	538.362	532.434	526.325	525.345	524.249	518.132	517.104	511.563	505.594	498.466	499.56	498.594	497.652	491.423	485.624	484.571	478.829	472.911	472.286	471.34	464.767	458.922	433.025
578.35	571.952	565.562	565.103	558.706	551.639	545.765	539.788	538.922	532.99	526.876	525.892	524.791	518.669	517.637	512.093	506.121	498.983	500.082	499.112	498.165	491.931	486.129	485.071	479.325	473.404	472.776	471.826	465.246	459.397	433.475
578.95	572.547	566.151	565.69	559.286	552.211	546.333	540.352	539.482	533.545	527.427	526.438	525.333	519.206	518.169	512.624	506.647	499.5	500.603	499.629	498.678	492.439	486.633	485.57	479.822	473.896	473.266	472.312	465.725	459.873	433.924
579.551	573.141	566.739	566.276	559.867	552.782	546.901	540.915	540.042	534.101	527.978	526.985	525.874	519.743	518.702	513.154	507.173	500.017	501.125	500.146	499.192	492.947	487.137	486.07	480.319	474.389	473.756	472.798	466.204	460.348	434.374
580.152	573.736	567.328	566.863	560.447	553.354	547.469	541.479	540.601	534.657	528.529	527.532	526.416	520.28	519.234	513.684	507.699	500.534	501.646	500.664	499.705	493.455	487.642	486.57	480.815	474.882	474.245	473.283	466.683	460.823	434.823
580.752	574.33	567.916	567.449	561.028	553.925	548.036	542.042	541.161	535.212	529.08	528.078	526.958	520.817	519.767	514.214	508.225	501.05	502.168	501.181	500.218	493.963	488.146	487.07	481.312	475.374	474.735	473.769	467.162	461.298	435.273
581.352	574.925	568.505	568.036	561.608	554.497	548.604	542.606	541.721	535.768	529.63	528.625	527.5	521.354	520.299	514.744	508.751	501.567	502.689	501.698	500.731	494.471	488.65	487.57	481.808	475.867	475.225	474.255	467.64	461.773	435.722
581.953	575.519	569.093	568.622	562.188	555.068	549.171	543.169	542.28	536.324	530.181	529.171	528.042	521.891	520.832	515.274	509.276	502.083	503.21	502.215	501.244	494.978	489.155	488.069	482.305	476.359	475.715	474.74	468.119	462.248	436.172
582.553	576.113	569.681	569.208	562.768	555.639	549.739	543.732	542.84	536.879	530.732	529.718	528.583	522.427	521.364	515.804	509.802	502.6	503.732	502.732	501.757	495.486	489.659	488.569	482.801	476.851	476.204	475.226	468.598	462.723	436.621
583.153	576.707	570.27	569.794	563.349	556.211	550.306	544.295	543.399	537.435	531.282	530.264	529.125	522.964	521.896	516.334	510.328	503.116	504.253	503.249	502.27	495.994	490.163	489.068	483.297	477.344	476.694	475.711	469.077	463.198	437.07
583.754	577.301	570.858	570.381	563.929	556.782	550.874	544.859	543.959	537.99	531.833	530.81	529.666	523.501	522.428	516.864	510.853	503.633	504.774	503.766	502.783	496.501	490.667	489.568	483.794	477.836	477.183	476.197	469.555	463.673	437.52
584.354	577.896	571.446	570.967	564.509	557.353	551.441	545.422	544.518	538.545	532.383	531.357	530.208	524.038	522.961	517.394	511.379	504.149	505.295	504.283	503.296	497.009	491.171	490.067	484.29	478.328	477.673	476.682	470.034	464.148	437.969
584.954	578.49	572.034	571.553	565.089	557.924	552.008	545.985	545.077	539.101	532.934	531.903	530.749	524.574	523.493	517.924	511.905	504.666	505.816	504.8	503.808	497.516	491.675	490.567	484.786	478.82	478.162	477.167	470.512	464.623	438.418
585.554	579.084	572.622	572.139	565.669	558.495	552.576	546.548	545.637	539.656	533.484	532.449	531.291	525.111	524.025	518.453	512.43	505.182	506.337	505.317	504.321	498.023	492.179	491.066	485.282	479.312	478.652	477.653	470.991	465.098	438.867
586.154	579.677	573.21	572.725	566.248	559.066	553.143	547.111	546.196	540.211	534.035	532.995	531.832	525.647	524.557	518.983	512.956	505.698	506.858	505.834	504.834	498.531	492.683	491.565	485.778	479.805	479.141	478.138	471.469	465.573	439.316
586.754	580.271	573.797	573.31	566.828	559.637	553.71	547.674	546.755	540.766	534.585	533.541	532.373	526.184	525.089	519.513	513.481	506.214	507.379	506.35	505.346	499.038	493.187	492.064	486.274	480.297	479.63	478.623	471.947	466.047	439.766
587.353	580.865	574.385	573.896	567.408	560.207	554.277	548.236	547.314	541.321	535.135	534.087	532.915	526.72	525.621	520.042	514.006	506.73	507.9	506.867	505.859	499.545	493.69	492.564	486.77	480.789	480.12	479.108	472.426	466.522	440.215
587.953	581.459	574.973	574.482	567.988	560.778	554.844	548.799	547.873	541.876	535.685	534.633	533.456	527.256	526.153	520.572	514.532	507.246	508.421	507.384	506.372	500.052	494.194	493.063	487.266	481.28	480.609	479.593	472.904	466.997	440.664
588.553	582.052	575.561	575.068	568.567	561.349	555.411	549.362	548.432	542.431	536.235	535.179	533.997	527.792	526.684	521.101	515.057	507.762	508.942	507.9	506.884	500.56	494.698	493.562	487.762	481.772	481.098	480.079	473.382	467.471	441.112
589.152	582.646	576.148	575.653	569.147	561.92	555.978	549.924	548.991	542.986	536.786	535.725	534.538	528.329	527.216	521.631	515.582	508.278	509.462	508.417	507.396	501.067	495.201	494.061	488.258	482.264	481.587	480.564	473.86	467.946	441.561
589.752	583.239	576.736	576.239	569.726	562.49	556.544	550.487	549.55	543.541	537.336	536.27	535.079	528.865	527.748	522.16	516.107	508.794	509.983	508.933	507.909	501.574	495.705	494.56	488.754	482.756	482.076	481.049	474.339	468.42	442.01
590.351	583.833	577.323	576.824	570.306	563.061	557.111	551.05	550.108	544.095	537.885	536.816	535.62	529.401	528.279	522.689	516.632	509.31	510.504	509.45	508.421	502.081	496.208	495.059	489.249	483.248	482.565	481.533	474.817	468.895	442.459
590.951	584.426	577.911	577.41	570.885	563.631	557.678	551.612	550.667	544.65	538.435	537.362	536.161	529.937	528.811	523.218	517.157	509.826	511.024	509.966	508.933	502.588	496.712	495.558	489.745	483.739	483.054	482.018	475.295	469.369	442.908
591.55	585.02	578.498	577.995	571.465	564.202	558.245	552.174	551.226	545.205	538.985	537.907	536.702	530.473	529.343	523.748	517.682	510.342	511.545	510.482	509.446	503.095	497.215	496.057	490.241	484.231	483.543	482.503	475.773	469.843	443.356
592.15	585.613	579.085	578.58	572.044	564.772	558.811	552.737	551.785	545.759	539.535	538.453	537.242	531.009	529.874	524.277	518.207	510.857	512.065	510.998	509.958	503.601	497.719	496.555	490.736	484.723	484.032	482.988	476.251	470.318	443.805
592.749	586.206	579.672	579.166	572.623	565.342	559.378	553.299	552.343	546.314	540.085	538.998	537.783	531.545	530.405	524.806	518.732	511.373	512.586	511.515	510.47	504.108	498.222	497.054	491.232	485.214	484.521	483.473	476.729	470.792	444.254
593.348	586.799	580.26	579.751	573.202	565.912	559.944	553.861	552.902	546.868	540.634	539.544	538.324	532.081	530.937	525.335	519.257	511.889	513.106	512.031	510.982	504.615	498.725	497.553	491.727	485.706	485.01	483.957	477.206	471.266	444.702
593.947	587.392	580.847	580.336	573.781	566.483	560.511	554.424	553.46	547.423	541.184	540.089	538.864	532.616	531.468	525.864	519.782	512.404	513.626	512.547	511.494	505.122	499.228	498.052	492.223	486.197	485.498	484.442	477.684	471.74	445.151
594.546	587.986	581.434	580.921	574.36	567.053	561.077	554.986	554.018	547.977	541.734	540.635	539.405	533.152	531.999	526.393	520.307	512.92	514.146	513.063	512.006	505.628	499.732	498.55	492.718	486.689	485.987	484.927	478.162	472.214	445.599
595.145	588.579	582.021	581.506	574.939	567.623	561.643	555.548	554.577	548.532	542.283	541.18	539.945	533.688	532.531	526.922	520.831	513.435	514.667	513.579	512.518	506.135	500.235	499.049	493.213	487.18	486.476	485.411	478.64	472.688	446.048
595.744	589.171	582.608	582.091	575.518	568.193	562.209	556.11	555.135	549.086	542.833	541.725	540.486	534.223	533.062	527.451	521.356	513.951	515.187	514.095	513.03	506.641	500.738	499.547	493.709	487.671	486.964	485.896	479.117	473.162	446.496
596.343	589.764	583.195	582.676	576.097	568.763	562.776	556.672	555.693	549.64	543.382	542.27	541.026	534.759	533.593	527.979	521.88	514.466	515.707	514.611	513.542	507.148	501.241	500.046	494.204	488.163	487.453	486.38	479.595	473.636	446.945
596.942	590.357	583.781	583.261	576.676	569.333	563.342	557.234	556.252	550.194	543.931	542.815	541.567	535.295	534.124	528.508	522.405	514.981	516.227	515.127	514.053	507.654	501.744	500.544	494.699	488.654	487.941	486.865	480.073	474.11	447.393
597.541	590.95	584.368	583.845	577.255	569.903	563.908	557.796	556.81	550.748	544.481	543.36	542.107	535.83	534.655	529.037	522.929	515.496	516.747	515.642	514.565	508.161	502.247	501.042	495.194	489.145	488.43	487.349	480.55	474.584	447.841
598.139	591.543	584.955	584.43	577.833	570.472	564.474	558.357	557.368	551.302	545.03	543.905	542.647	536.365	535.186	529.565	523.454	516.012	517.267	516.158	515.077	508.667	502.75	501.541	495.689	489.636	488.918	487.833	481.028	475.058	448.29
598.738	592.135	585.541	585.015	578.412	571.042	565.04	558.919	557.926	551.856	545.579	544.45	543.187	536.901	535.717	530.094	523.978	516.527	517.787	516.674	515.588	509.173	503.252	502.039	496.184	490.127	489.407	488.317	481.505	475.532	448.738
599.337	592.728	586.128	585.599	578.991	571.612	565.606	559.481	558.484	552.41	546.128	544.995	543.728	537.436	536.248	530.622	524.503	517.042	518.307	517.19	516.1	509.68	503.755	502.537	496.679	490.618	489.895	488.802	481.982	476.005	449.186
599.935	593.32	586.715	586.184	579.569	572.181	566.172	560.042	559.042	552.964	546.677	545.54	544.268	537.971	536.779	531.151	525.027	517.557	518.826	517.705	516.611	510.186	504.258	503.035	497.174	491.109	490.383	489.286	482.46	476.479	449.634
600.534	593.913	587.301	586.768	580.148	572.751	566.737	560.604	559.599	553.518	547.226	546.085	544.808	538.507	537.309	531.679	525.551	518.072	519.346	518.221	517.123	510.692	504.761	503.534	497.669	491.6	490.872	489.77	482.937	476.953	450.082
601.132	594.505	587.887	587.353	580.726	573.32	567.303	561.166	560.157	554.072	547.775	546.63	545.348	539.042	537.84	532.208	526.075	518.587	519.866	518.736	517.634	511.198	505.263	504.032	498.164	492.091	491.36	490.254	483.414	477.426	450.53
601.73	595.097	588.474	587.937	581.304	573.89	567.869	561.727	560.715	554.626	548.324	547.174	545.888	539.577	538.371	532.736	526.599	519.102	520.385	519.252	518.146	511.704	505.766	504.53	498.659	492.582	491.848	490.738	483.892	477.9	450.978
602.329	595.69	589.06	588.522	581.883	574.459	568.434	562.288	561.273	555.179	548.873	547.719	546.428	540.112	538.901	533.264	527.123	519.617	520.905	519.767	518.657	512.21	506.268	505.028	499.154	493.073	492.336	491.222	484.369	478.373	451.426
602.927	596.282	589.646	589.106	582.461	575.029	569	562.85	561.83	555.733	549.422	548.263	546.967	540.647	539.432	533.792	527.647	520.131	521.424	520.282	519.168	512.716	506.771	505.526	499.648	493.563	492.824	491.706	484.846	478.847	451.874
603.525	596.874	590.232	589.69	583.039	575.598	569.565	563.411	562.388	556.286	549.971	548.808	547.507	541.182	539.962	534.321	528.171	520.646	521.944	520.798	519.68	513.222	507.273	506.023	500.143	494.054	493.312	492.19	485.323	479.32	452.322
604.123	597.466	590.818	590.274	583.617	576.167	570.131	563.972	562.945	556.84	550.519	549.352	548.047	541.717	540.493	534.849	528.695	521.161	522.463	521.313	520.191	513.728	507.776	506.521	500.638	494.545	493.8	492.674	485.8	479.794	452.77
604.721	598.058	591.405	590.858	584.195	576.736	570.696	564.534	563.503	557.393	551.068	549.897	548.587	542.252	541.023	535.377	529.219	521.676	522.983	521.828	520.702	514.234	508.278	507.019	501.132	495.035	494.288	493.158	486.277	480.267	453.218
605.319	598.65	591.991	591.442	584.773	577.305	571.262	565.095	564.06	557.947	551.617	550.441	549.126	542.786	541.554	535.905	529.743	522.19	523.502	522.343	521.213	514.739	508.78	507.517	501.627	495.526	494.776	493.641	486.754	480.74	453.665
605.917	599.242	592.576	592.026	585.351	577.874	571.827	565.656	564.618	558.5	552.165	550.986	549.666	543.321	542.084	536.433	530.267	522.705	524.021	522.859	521.724	515.245	509.283	508.015	502.121	496.016	495.263	494.125	487.231	481.214	454.113
606.515	599.834	593.162	592.61	585.929	578.443	572.392	566.217	565.175	559.053	552.714	551.53	550.205	543.856	542.614	536.961	530.79	523.219	524.541	523.374	522.235	515.751	509.785	508.512	502.616	496.507	495.751	494.609	487.708	481.687	454.561
607.113	600.426	593.748	593.194	586.507	579.012	572.957	566.778	565.732	559.607	553.262	552.074	550.745	544.39	543.144	537.488	531.314	523.734	525.06	523.889	522.746	516.256	510.287	509.01	503.11	496.997	496.239	495.092	488.185	482.16	455.008
607.711	601.017	594.334	593.778	587.085	579.581	573.522	567.339	566.289	560.16	553.811	552.618	551.284	544.925	543.674	538.016	531.838	524.248	525.579	524.404	523.257	516.762	510.789	509.507	503.604	497.488	496.727	495.576	488.661	482.633	455.456
608.308	601.609	594.92	594.361	587.662	580.15	574.088	567.9	566.846	560.713	554.359	553.162	551.823	545.459	544.204	538.544	532.361	524.762	526.098	524.918	523.768	517.268	511.291	510.005	504.099	497.978	497.214	496.059	489.138	483.106	455.903
608.906	602.201	595.505	594.945	588.24	580.719	574.653	568.46	567.404	561.266	554.907	553.706	552.363	545.994	544.734	539.072	532.885	525.277	526.617	525.433	524.278	517.773	511.793	510.502	504.593	498.468	497.702	496.543	489.615	483.579	456.351
609.503	602.792	596.091	595.529	588.818	581.287	575.217	569.021	567.961	561.819	555.455	554.25	552.902	546.528	545.264	539.599	533.408	525.791	527.136	525.948	524.789	518.278	512.295	511	505.087	498.958	498.189	497.026	490.091	484.052	456.798
610.101	603.384	596.676	596.112	589.395	581.856	575.782	569.582	568.518	562.372	556.004	554.794	553.441	547.063	545.794	540.127	533.932	526.305	527.655	526.463	525.3	518.784	512.797	511.497	505.581	499.449	498.677	497.51	490.568	484.525	457.246
610.698	603.975	597.262	596.696	589.973	582.425	576.347	570.142	569.074	562.925	556.552	555.338	553.98	547.597	546.324	540.654	534.455	526.819	528.174	526.978	525.81	519.289	513.299	511.994	506.075	499.939	499.164	497.993	491.045	484.998	457.693
611.296	604.567	597.847	597.279	590.55	582.993	576.912	570.703	569.631	563.478	557.1	555.882	554.519	548.131	546.854	541.182	534.978	527.333	528.693	527.492	526.321	519.794	513.801	512.492	506.57	500.429	499.652	498.476	491.521	485.471	458.141
611.893	605.158	598.433	597.862	591.127	583.562	577.477	571.264	570.188	564.03	557.648	556.426	555.058	548.666	547.384	541.709	535.502	527.847	529.212	528.007	526.832	520.3	514.303	512.989	507.064	500.919	500.139	498.96	491.997	485.943	458.588
612.49	605.749	599.018	598.446	591.705	584.13	578.041	571.824	570.745	564.583	558.196	556.969	555.597	549.2	547.914	542.237	536.025	528.362	529.73	528.521	527.342	520.805	514.804	513.486	507.558	501.409	500.626	499.443	492.474	486.416	459.035
613.088	606.34	599.603	599.029	592.282	584.699	578.606	572.384	571.302	565.136	558.744	557.513	556.136	549.734	548.443	542.764	536.548	528.875	530.249	529.036	527.852	521.31	515.306	513.983	508.051	501.899	501.114	499.926	492.95	486.889	459.482
613.685	606.931	600.188	599.612	592.859	585.267	579.171	572.945	571.858	565.689	559.291	558.057	556.675	550.268	548.973	543.291	537.071	529.389	530.768	529.55	528.363	521.815	515.808	514.48	508.545	502.389	501.601	500.409	493.427	487.362	459.929
614.282	607.523	600.773	600.195	593.436	585.835	579.735	573.505	572.415	566.241	559.839	558.6	557.214	550.802	549.502	543.819	537.594	529.903	531.286	530.065	528.873	522.32	516.309	514.977	509.039	502.879	502.088	500.892	493.903	487.834	460.377
614.879	608.114	601.358	600.779	594.013	586.403	580.3	574.065	572.971	566.794	560.387	559.144	557.753	551.336	550.032	544.346	538.117	530.417	531.805	530.579	529.383	522.825	516.811	515.474	509.533	503.368	502.575	501.375	494.379	488.307	460.824
615.476	608.705	601.943	601.362	594.59	586.972	580.864	574.626	573.528	567.346	560.935	559.687	558.292	551.87	550.561	544.873	538.64	530.931	532.323	531.093	529.894	523.33	517.312	515.971	510.027	503.858	503.062	501.858	494.855	488.779	461.271
616.073	609.295	602.528	601.945	595.167	587.54	581.428	575.186	574.084	567.899	561.482	560.231	558.83	552.404	551.091	545.4	539.163	531.445	532.842	531.608	530.404	523.835	517.814	516.468	510.52	504.348	503.549	502.341	495.331	489.252	461.718
616.67	609.886	603.113	602.527	595.744	588.108	581.993	575.746	574.641	568.451	562.03	560.774	559.369	552.937	551.62	545.927	539.686	531.958	533.36	532.122	530.914	524.34	518.315	516.965	511.014	504.838	504.036	502.824	495.807	489.724	462.165
617.266	610.477	603.698	603.11	596.321	588.676	582.557	576.306	575.197	569.003	562.577	561.317	559.908	553.471	552.15	546.454	540.209	532.472	533.878	532.636	531.424	524.845	518.816	517.462	511.508	505.327	504.523	503.307	496.284	490.197	462.612
617.863	611.068	604.283	603.693	596.898	589.244	583.121	576.866	575.753	569.555	563.125	561.861	560.446	554.005	552.679	546.981	540.731	532.985	534.397	533.15	531.934	525.349	519.318	517.958	512.001	505.817	505.01	503.79	496.76	490.669	463.058
618.46	611.659	604.868	604.276	597.475	589.811	583.685	577.426	576.309	570.108	563.672	562.404	560.984	554.538	553.208	547.508	541.254	533.499	534.915	533.664	532.444	525.854	519.819	518.455	512.495	506.306	505.497	504.272	497.236	491.141	463.505
619.056	612.249	605.452	604.859	598.051	590.379	584.249	577.986	576.866	570.66	564.22	562.947	561.523	555.072	553.737	548.035	541.777	534.012	535.433	534.178	532.954	526.359	520.32	518.952	512.988	506.796	505.984	504.755	497.711	491.614	463.952
619.653	612.84	606.037	605.441	598.628	590.947	584.813	578.545	577.422	571.212	564.767	563.49	562.061	555.606	554.266	548.561	542.299	534.526	535.951	534.692	533.464	526.863	520.821	519.448	513.481	507.285	506.47	505.238	498.187	492.086	464.399
620.249	613.43	606.621	606.024	599.205	591.515	585.377	579.105	577.978	571.764	565.314	564.033	562.6	556.139	554.795	549.088	542.822	535.039	536.469	535.206	533.974	527.368	521.322	519.945	513.975	507.775	506.957	505.72	498.663	492.558	464.846
620.846	614.021	607.206	606.606	599.781	592.082	585.941	579.665	578.534	572.316	565.861	564.576	563.138	556.673	555.324	549.615	543.344	535.552	536.987	535.72	534.484	527.872	521.824	520.442	514.468	508.264	507.444	506.203	499.139	493.03	465.292
621.442	614.611	607.79	607.189	600.358	592.65	586.505	580.225	579.09	572.868	566.409	565.119	563.676	557.206	555.853	550.141	543.867	536.066	537.505	536.234	534.994	528.377	522.325	520.938	514.961	508.753	507.93	506.686	499.615	493.502	465.739
622.039	615.201	608.375	607.771	600.934	593.218	587.069	580.784	579.645	573.42	566.956	565.662	564.214	557.739	556.382	550.668	544.389	536.579	538.023	536.748	535.503	528.881	522.826	521.434	515.455	509.243	508.417	507.168	500.09	493.974	466.186
622.635	615.792	608.959	608.353	601.51	593.785	587.632	581.344	580.201	573.972	567.503	566.205	564.752	558.273	556.911	551.195	544.912	537.092	538.541	537.261	536.013	529.386	523.326	521.931	515.948	509.732	508.903	507.65	500.566	494.446	466.632
623.231	616.382	609.543	608.936	602.087	594.352	588.196	581.903	580.757	574.523	568.05	566.747	565.29	558.806	557.44	551.721	545.434	537.605	539.059	537.775	536.523	529.89	523.827	522.427	516.441	510.221	509.39	508.133	501.042	494.918	467.079
623.827	616.972	610.127	609.518	602.663	594.92	588.76	582.463	581.313	575.075	568.597	567.29	565.828	559.339	557.969	552.248	545.956	538.118	539.577	538.289	537.032	530.394	524.328	522.923	516.934	510.71	509.876	508.615	501.517	495.39	467.525
624.423	617.562	610.712	610.1	603.239	595.487	589.323	583.022	581.869	575.627	569.144	567.833	566.366	559.872	558.497	552.774	546.478	538.631	540.095	538.802	537.542	530.898	524.829	523.42	517.427	511.199	510.363	509.098	501.993	495.862	467.971
625.019	618.152	611.296	610.682	603.815	596.054	589.887	583.581	582.424	576.178	569.69	568.375	566.904	560.405	559.026	553.3	547	539.144	540.612	539.316	538.051	531.403	525.33	523.916	517.92	511.688	510.849	509.58	502.468	496.334	468.418
625.615	618.742	611.88	611.264	604.391	596.622	590.45	584.141	582.98	576.73	570.237	568.918	567.442	560.938	559.555	553.827	547.523	539.657	541.13	539.829	538.561	531.907	525.83	524.412	518.413	512.177	511.335	510.062	502.944	496.806	468.864
626.211	619.332	612.464	611.846	604.967	597.189	591.014	584.7	583.535	577.281	570.784	569.461	567.98	561.471	560.083	554.353	548.045	540.17	541.648	540.343	539.07	532.411	526.331	524.908	518.906	512.666	511.821	510.544	503.419	497.277	469.311
626.807	619.922	613.048	612.428	605.543	597.756	591.577	585.259	584.091	577.833	571.331	570.003	568.518	562.004	560.612	554.879	548.567	540.683	542.165	540.856	539.579	532.915	526.832	525.404	519.399	513.155	512.308	511.026	503.894	497.749	469.757
627.403	620.512	613.631	613.01	606.119	598.323	592.14	585.818	584.646	578.384	571.877	570.545	569.055	562.537	561.14	555.405	549.089	541.196	542.683	541.37	540.089	533.419	527.332	525.9	519.892	513.644	512.794	511.508	504.37	498.221	470.203
627.999	621.101	614.215	613.592	606.695	598.89	592.704	586.377	585.201	578.936	572.424	571.088	569.593	563.07	561.669	555.931	549.611	541.709	543.2	541.883	540.598	533.923	527.833	526.396	520.384	514.133	513.28	511.99	504.845	498.692	470.649
628.594	621.691	614.799	614.174	607.271	599.457	593.267	586.936	585.757	579.487	572.97	571.63	570.131	563.603	562.197	556.457	550.132	542.221	543.717	542.396	541.107	534.427	528.333	526.892	520.877	514.622	513.766	512.472	505.32	499.164	471.095
629.19	622.281	615.383	614.755	607.847	600.024	593.83	587.495	586.312	580.038	573.517	572.172	570.668	564.135	562.725	556.983	550.654	542.734	544.235	542.909	541.616	534.931	528.834	527.388	521.37	515.11	514.252	512.954	505.795	499.636	471.541
629.785	622.87	615.966	615.337	608.422	600.591	594.393	588.054	586.867	580.589	574.063	572.715	571.206	564.668	563.254	557.509	551.176	543.247	544.752	543.422	542.125	535.434	529.334	527.884	521.862	515.599	514.738	513.436	506.27	500.107	471.988
630.381	623.46	616.55	615.919	608.998	601.157	594.956	588.613	587.422	581.141	574.61	573.257	571.743	565.201	563.782	558.035	551.698	543.759	545.269	543.936	542.634	535.938	529.834	528.38	522.355	516.088	515.224	513.918	506.746	500.578	472.434
630.976	624.049	617.133	616.5	609.573	601.724	595.519	589.172	587.977	581.692	575.156	573.799	572.28	565.733	564.31	558.561	552.219	544.272	545.787	544.449	543.143	536.442	530.334	528.875	522.848	516.576	515.71	514.4	507.221	501.05	472.88
631.572	624.639	617.717	617.082	610.149	602.291	596.082	589.731	588.532	582.243	575.702	574.341	572.818	566.266	564.838	559.087	552.741	544.784	546.304	544.962	543.652	536.945	530.835	529.371	523.34	517.065	516.196	514.882	507.696	501.521	473.325
632.167	625.228	618.3	617.663	610.724	602.857	596.645	590.289	589.087	582.794	576.249	574.883	573.355	566.798	565.366	559.612	553.263	545.297	546.821	545.475	544.161	537.449	531.335	529.867	523.832	517.553	516.682	515.364	508.171	501.993	473.771
632.762	625.817	618.884	618.245	611.3	603.424	597.208	590.848	589.642	583.345	576.795	575.425	573.892	567.331	565.894	560.138	553.784	545.809	547.338	545.988	544.67	537.953	531.835	530.362	524.325	518.042	517.167	515.845	508.645	502.464	474.217
633.358	626.407	619.467	618.826	611.875	603.991	597.771	591.406	590.197	583.896	577.341	575.967	574.43	567.863	566.422	560.664	554.306	546.321	547.855	546.5	545.179	538.456	532.335	530.858	524.817	518.53	517.653	516.327	509.12	502.935	474.663
633.953	626.996	620.05	619.407	612.45	604.557	598.333	591.965	590.752	584.446	577.887	576.509	574.967	568.396	566.95	561.189	554.827	546.833	548.372	547.013	545.688	538.96	532.835	531.353	525.31	519.018	518.139	516.808	509.595	503.406	475.109
634.548	627.585	620.633	619.988	613.026	605.123	598.896	592.523	591.307	584.997	578.433	577.05	575.504	568.928	567.478	561.715	555.348	547.346	548.889	547.526	546.196	539.463	533.335	531.849	525.802	519.507	518.624	517.29	510.07	503.877	475.555
635.143	628.174	621.216	620.57	613.601	605.69	599.458	593.082	591.862	585.548	578.979	577.592	576.041	569.46	568.006	562.24	555.87	547.858	549.406	548.039	546.705	539.967	533.835	532.344	526.294	519.995	519.11	517.772	510.545	504.349	476
635.738	628.763	621.8	621.151	614.176	606.256	600.021	593.64	592.416	586.099	579.525	578.134	576.578	569.992	568.533	562.766	556.391	548.37	549.923	548.551	547.214	540.47	534.335	532.839	526.786	520.483	519.595	518.253	511.019	504.82	476.446
636.333	629.352	622.383	621.732	614.751	606.822	600.584	594.199	592.971	586.649	580.071	578.676	577.115	570.524	569.061	563.291	556.912	548.882	550.439	549.064	547.722	540.973	534.835	533.335	527.278	520.971	520.081	518.734	511.494	505.291	476.892
636.928	629.941	622.966	622.313	615.326	607.388	601.146	594.757	593.525	587.2	580.616	579.217	577.652	571.057	569.589	563.817	557.433	549.394	550.956	549.577	548.231	541.476	535.335	533.83	527.77	521.46	520.566	519.216	511.969	505.762	477.337
637.523	630.53	623.548	622.894	615.901	607.955	601.708	595.315	594.08	587.75	581.162	579.759	578.188	571.589	570.116	564.342	557.955	549.906	551.473	550.089	548.739	541.98	535.834	534.325	528.262	521.948	521.052	519.697	512.443	506.232	477.783
638.117	631.119	624.131	623.475	616.476	608.521	602.271	595.873	594.634	588.301	581.708	580.3	578.725	572.121	570.644	564.867	558.476	550.418	551.989	550.602	549.248	542.483	536.334	534.821	528.754	522.436	521.537	520.178	512.918	506.703	478.228
638.712	631.707	624.714	624.055	617.051	609.087	602.833	596.431	595.189	588.851	582.254	580.842	579.262	572.653	571.172	565.392	558.997	550.93	552.506	551.114	549.756	542.986	536.834	535.316	529.246	522.924	522.022	520.66	513.392	507.174	478.674
639.307	632.296	625.297	624.636	617.626	609.653	603.395	596.989	595.743	589.402	582.799	581.383	579.799	573.184	571.699	565.917	559.518	551.442	553.023	551.626	550.264	543.489	537.333	535.811	529.738	523.412	522.508	521.141	513.867	507.645	479.119
639.901	632.885	625.88	625.217	618.2	610.219	603.957	597.547	596.297	589.952	583.345	581.924	580.335	573.716	572.227	566.443	560.039	551.954	553.539	552.139	550.773	543.992	537.833	536.306	530.23	523.9	522.993	521.622	514.341	508.116	479.565
640.496	633.473	626.462	625.798	618.775	610.784	604.52	598.105	596.852	590.502	583.89	582.466	580.872	574.248	572.754	566.968	560.559	552.465	554.056	552.651	551.281	544.495	538.333	536.801	530.722	524.388	523.478	522.103	514.815	508.587	480.01
641.09	634.062	627.045	626.378	619.35	611.35	605.082	598.663	597.406	591.052	584.436	583.007	581.408	574.78	573.281	567.493	561.08	552.977	554.572	553.163	551.789	544.998	538.832	537.296	531.214	524.875	523.963	522.584	515.29	509.057	480.455
641.685	634.65	627.627	626.959	619.924	611.916	605.644	599.221	597.96	591.603	584.981	583.548	581.945	575.311	573.808	568.018	561.601	553.489	555.088	553.676	552.297	545.501	539.331	537.791	531.706	525.363	524.448	523.065	515.764	509.528	480.9
642.279	635.239	628.21	627.539	620.499	612.482	606.206	599.779	598.514	592.153	585.527	584.089	582.481	575.843	574.336	568.542	562.122	554	555.605	554.188	552.805	546.004	539.831	538.286	532.197	525.851	524.933	523.546	516.238	509.998	481.346
642.873	635.827	628.792	628.12	621.073	613.047	606.768	600.337	599.068	592.703	586.072	584.63	583.018	576.375	574.863	569.067	562.643	554.512	556.121	554.7	553.313	546.506	540.33	538.78	532.689	526.339	525.418	524.027	516.712	510.469	481.791
643.468	636.415	629.374	628.7	621.648	613.613	607.329	600.894	599.622	593.253	586.617	585.171	583.554	576.906	575.39	569.592	563.163	555.023	556.637	555.212	553.821	547.009	540.83	539.275	533.18	526.826	525.903	524.508	517.187	510.939	482.236
644.062	637.003	629.957	629.281	622.222	614.179	607.891	601.452	600.176	593.803	587.162	585.712	584.09	577.438	575.917	570.117	563.684	555.535	557.153	555.724	554.329	547.512	541.329	539.77	533.672	527.314	526.388	524.989	517.661	511.41	482.681
644.656	637.592	630.539	629.861	622.796	614.744	608.453	602.01	600.73	594.353	587.707	586.253	584.627	577.969	576.444	570.642	564.204	556.046	557.669	556.236	554.837	548.014	541.828	540.265	534.164	527.801	526.873	525.47	518.135	511.88	483.126
645.25	638.18	631.121	630.441	623.371	615.309	609.015	602.567	601.284	594.903	588.253	586.794	585.163	578.501	576.971	571.166	564.725	556.558	558.185	556.748	555.345	548.517	542.327	540.759	534.655	528.289	527.358	525.951	518.609	512.351	483.571
645.844	638.768	631.703	631.021	623.945	615.875	609.576	603.125	601.838	595.452	588.798	587.335	585.699	579.032	577.498	571.691	565.245	557.069	558.701	557.26	555.853	549.02	542.826	541.254	535.146	528.776	527.843	526.431	519.083	512.821	484.016
646.438	639.356	632.285	631.601	624.519	616.44	610.138	603.682	602.391	596.002	589.343	587.876	586.235	579.563	578.025	572.215	565.766	557.58	559.217	557.772	556.361	549.522	543.325	541.748	535.638	529.264	528.328	526.912	519.557	513.291	484.461
647.032	639.944	632.867	632.181	625.093	617.005	610.7	604.239	602.945	596.552	589.888	588.417	586.771	580.095	578.552	572.74	566.286	558.092	559.733	558.283	556.869	550.025	543.824	542.243	536.129	529.751	528.812	527.393	520.03	513.762	484.906
647.626	640.532	633.449	632.761	625.667	617.571	611.261	604.797	603.499	597.101	590.432	588.957	587.307	580.626	579.079	573.264	566.807	558.603	560.249	558.795	557.376	550.527	544.323	542.737	536.62	530.239	529.297	527.873	520.504	514.232	485.351
648.22	641.119	634.031	633.341	626.241	618.136	611.823	605.354	604.052	597.651	590.977	589.498	587.843	581.157	579.605	573.789	567.327	559.114	560.765	559.307	557.884	551.029	544.822	543.232	537.112	530.726	529.782	528.354	520.978	514.702	485.796
648.813	641.707	634.613	633.921	626.815	618.701	612.384	605.911	604.606	598.201	591.522	590.039	588.379	581.688	580.132	574.313	567.847	559.625	561.281	559.818	558.392	551.532	545.321	543.726	537.603	531.213	530.266	528.834	521.452	515.172	486.241
649.407	642.295	635.195	634.501	627.389	619.266	612.945	606.468	605.159	598.75	592.067	590.579	588.915	582.219	580.659	574.838	568.367	560.136	561.797	560.33	558.899	552.034	545.82	544.221	538.094	531.7	530.751	529.315	521.926	515.642	486.685
650.001	642.883	635.777	635.081	627.963	619.831	613.507	607.026	605.713	599.3	592.612	591.12	589.451	582.75	581.185	575.362	568.887	560.647	562.312	560.842	559.407	552.536	546.319	544.715	538.585	532.188	531.235	529.795	522.399	516.112	487.13
650.594	643.47	636.358	635.661	628.537	620.396	614.068	607.583	606.266	599.849	593.156	591.66	589.986	583.281	581.712	575.886	569.407	561.158	562.828	561.353	559.914	553.038	546.818	545.209	539.076	532.675	531.72	530.276	522.873	516.582	487.575
651.188	644.058	636.94	636.24	629.11	620.961	614.629	608.14	606.819	600.398	593.701	592.201	590.522	583.812	582.238	576.41	569.927	561.669	563.344	561.865	560.422	553.541	547.316	545.703	539.567	533.162	532.204	530.756	523.347	517.052	488.019
651.781	644.645	637.522	636.82	629.684	621.526	615.19	608.697	607.373	600.948	594.245	592.741	591.058	584.343	582.765	576.935	570.447	562.18	563.859	562.376	560.929	554.043	547.815	546.198	540.058	533.649	532.688	531.236	523.82	517.522	488.464
652.375	645.233	638.103	637.4	630.258	622.091	615.751	609.254	607.926	601.497	594.79	593.281	591.593	584.874	583.291	577.459	570.967	562.691	564.375	562.887	561.436	554.545	548.314	546.692	540.549	534.136	533.173	531.717	524.294	517.992	488.909
652.968	645.82	638.685	637.979	630.831	622.655	616.312	609.81	608.479	602.046	595.334	593.821	592.129	585.404	583.818	577.983	571.487	563.201	564.89	563.399	561.944	555.047	548.812	547.186	541.04	534.623	533.657	532.197	524.767	518.462	489.353
653.561	646.408	639.266	638.559	631.405	623.22	616.873	610.367	609.032	602.595	595.879	594.362	592.664	585.935	584.344	578.507	572.007	563.712	565.406	563.91	562.451	555.549	549.311	547.68	541.531	535.11	534.141	532.677	525.24	518.932	489.798
654.155	646.995	639.847	639.138	631.978	623.785	617.434	610.924	609.585	603.144	596.423	594.902	593.2	586.466	584.87	579.031	572.527	564.223	565.921	564.421	562.958	556.051	549.809	548.174	542.022	535.597	534.625	533.157	525.714	519.402	490.242
654.748	647.582	640.429	639.717	632.552	624.349	617.995	611.481	610.138	603.693	596.967	595.442	593.735	586.996	585.397	579.555	573.047	564.733	566.436	564.932	563.465	556.553	550.308	548.668	542.512	536.083	535.11	533.637	526.187	519.871	490.687
655.341	648.169	641.01	640.297	633.125	624.914	618.556	612.037	610.691	604.242	597.512	595.982	594.271	587.527	585.923	580.078	573.566	565.244	566.952	565.444	563.972	557.054	550.806	549.162	543.003	536.57	535.594	534.117	526.661	520.341	491.131
655.934	648.756	641.591	640.876	633.698	625.478	619.117	612.594	611.244	604.791	598.056	596.522	594.806	588.058	586.449	580.602	574.086	565.755	567.467	565.955	564.479	557.556	551.305	549.655	543.494	537.057	536.078	534.597	527.134	520.811	491.575
656.527	649.343	642.172	641.455	634.272	626.043	619.677	613.151	611.797	605.34	598.6	597.062	595.341	588.588	586.975	581.126	574.606	566.265	567.982	566.466	564.986	558.058	551.803	550.149	543.984	537.544	536.562	535.077	527.607	521.28	492.02
657.12	649.931	642.754	642.034	634.845	626.607	620.238	613.707	612.35	605.889	599.144	597.602	595.876	589.118	587.501	581.65	575.125	566.776	568.497	566.977	565.493	558.56	552.301	550.643	544.475	538.03	537.046	535.557	528.08	521.75	492.464
657.713	650.517	643.335	642.613	635.418	627.172	620.799	614.264	612.903	606.438	599.688	598.142	596.412	589.649	588.027	582.173	575.645	567.286	569.012	567.488	566	559.061	552.8	551.137	544.966	538.517	537.53	536.037	528.553	522.219	492.908
658.306	651.104	643.916	643.192	635.991	627.736	621.359	614.82	613.455	606.987	600.232	598.682	596.947	590.179	588.553	582.697	576.164	567.796	569.527	567.999	566.507	559.563	553.298	551.63	545.456	539.003	538.014	536.517	529.026	522.689	493.352
658.899	651.691	644.497	643.771	636.564	628.3	621.92	615.376	614.008	607.535	600.776	599.221	597.482	590.71	589.079	583.221	576.684	568.307	570.042	568.509	567.014	560.065	553.796	552.124	545.947	539.49	538.497	536.997	529.499	523.158	493.796
659.491	652.278	645.077	644.35	637.137	628.864	622.48	615.933	614.561	608.084	601.32	599.761	598.017	591.24	589.605	583.744	577.203	568.817	570.557	569.02	567.521	560.566	554.294	552.618	546.437	539.976	538.981	537.476	529.973	523.628	494.24
660.084	652.865	645.658	644.929	637.71	629.429	623.041	616.489	615.113	608.633	601.864	600.301	598.552	591.77	590.13	584.268	577.722	569.327	571.072	569.531	568.027	561.068	554.792	553.111	546.927	540.463	539.465	537.956	530.445	524.097	494.685
660.677	653.451	646.239	645.508	638.283	629.993	623.601	617.045	615.666	609.181	602.408	600.84	599.087	592.3	590.656	584.791	578.242	569.837	571.587	570.042	568.534	561.569	555.29	553.605	547.418	540.949	539.949	538.436	530.918	524.566	495.129
661.269	654.038	646.82	646.087	638.856	630.557	624.161	617.601	616.218	609.73	602.951	601.38	599.622	592.83	591.182	585.314	578.761	570.348	572.102	570.552	569.041	562.07	555.788	554.098	547.908	541.436	540.432	538.915	531.391	525.035	495.573
661.862	654.625	647.4	646.665	639.428	631.121	624.722	618.157	616.771	610.278	603.495	601.919	600.157	593.36	591.708	585.838	579.28	570.858	572.617	571.063	569.547	562.572	556.286	554.592	548.398	541.922	540.916	539.395	531.864	525.505	496.017
662.454	655.211	647.981	647.244	640.001	631.685	625.282	618.713	617.323	610.827	604.039	602.459	600.691	593.89	592.233	586.361	579.799	571.368	573.131	571.574	570.054	563.073	556.784	555.085	548.888	542.408	541.4	539.875	532.337	525.974	496.46
663.047	655.798	648.562	647.823	640.574	632.248	625.842	619.269	617.875	611.375	604.582	602.998	601.226	594.42	592.759	586.884	580.319	571.878	573.646	572.084	570.56	563.574	557.282	555.578	549.379	542.894	541.883	540.354	532.81	526.443	496.904
663.639	656.384	649.142	648.401	641.147	632.812	626.402	619.825	618.428	611.923	605.126	603.538	601.761	594.95	593.284	587.408	580.838	572.388	574.161	572.595	571.067	564.076	557.78	556.072	549.869	543.381	542.367	540.834	533.282	526.912	497.348
664.231	656.971	649.723	648.98	641.719	633.376	626.962	620.381	618.98	612.471	605.67	604.077	602.295	595.48	593.81	587.931	581.357	572.898	574.675	573.105	571.573	564.577	558.277	556.565	550.359	543.867	542.85	541.313	533.755	527.381	497.792
664.824	657.557	650.303	649.558	642.292	633.94	627.522	620.937	619.532	613.02	606.213	604.616	602.83	596.01	594.335	588.454	581.876	573.407	575.19	573.616	572.08	565.078	558.775	557.058	550.849	544.353	543.334	541.792	534.228	527.85	498.236
665.416	658.143	650.883	650.137	642.864	634.503	628.082	621.493	620.084	613.568	606.756	605.156	603.365	596.54	594.861	588.977	582.395	573.917	575.704	574.126	572.586	565.579	559.273	557.551	551.339	544.839	543.817	542.272	534.7	528.319	498.68
666.008	658.729	651.464	650.715	643.436	635.067	628.642	622.049	620.636	614.116	607.3	605.695	603.899	597.069	595.386	589.5	582.913	574.427	576.219	574.636	573.092	566.08	559.77	558.044	551.829	545.325	544.3	542.751	535.173	528.788	499.123
666.6	659.315	652.044	651.293	644.009	635.631	629.202	622.605	621.188	614.664	607.843	606.234	604.433	597.599	595.911	590.023	583.432	574.937	576.733	575.147	573.599	566.581	560.268	558.537	552.319	545.811	544.784	543.23	535.646	529.257	499.567
667.192	659.902	652.624	651.872	644.581	636.194	629.762	623.16	621.74	615.212	608.386	606.773	604.968	598.129	596.436	590.546	583.951	575.446	577.248	575.657	574.105	567.082	560.765	559.031	552.809	546.297	545.267	543.709	536.118	529.726	500.01
667.784	660.488	653.204	652.45	645.153	636.758	630.322	623.716	622.292	615.76	608.93	607.312	605.502	598.658	596.962	591.069	584.47	575.956	577.762	576.167	574.611	567.583	561.263	559.524	553.298	546.783	545.75	544.189	536.59	530.195	500.454
668.376	661.074	653.784	653.028	645.726	637.321	630.881	624.271	622.844	616.308	609.473	607.851	606.037	599.188	597.487	591.592	584.988	576.466	578.276	576.677	575.117	568.084	561.76	560.016	553.788	547.269	546.233	544.668	537.063	530.664	500.898
668.968	661.66	654.364	653.606	646.298	637.885	631.441	624.827	623.396	616.856	610.016	608.39	606.571	599.717	598.012	592.114	585.507	576.975	578.79	577.187	575.623	568.585	562.258	560.509	554.278	547.755	546.716	545.147	537.535	531.132	501.341
669.56	662.245	654.944	654.184	646.87	638.448	632.001	625.382	623.948	617.404	610.559	608.929	607.105	600.247	598.537	592.637	586.026	577.485	579.305	577.697	576.129	569.085	562.755	561.002	554.768	548.24	547.2	545.626	538.008	531.601	501.785
670.151	662.831	655.524	654.762	647.442	639.011	632.56	625.938	624.499	617.951	611.102	609.468	607.639	600.776	599.062	593.16	586.544	577.994	579.819	578.207	576.635	569.586	563.253	561.495	555.257	548.726	547.683	546.105	538.48	532.07	502.228
670.743	663.417	656.104	655.34	648.014	639.574	633.12	626.493	625.051	618.499	611.645	610.007	608.173	601.306	599.587	593.682	587.063	578.504	580.333	578.717	577.141	570.087	563.75	561.988	555.747	549.212	548.166	546.584	538.952	532.538	502.671
671.335	664.003	656.684	655.918	648.586	640.138	633.679	627.048	625.603	619.047	612.188	610.545	608.707	601.835	600.112	594.205	587.581	579.013	580.847	579.227	577.647	570.588	564.247	562.481	556.236	549.697	548.649	547.063	539.424	533.007	503.115
671.926	664.589	657.264	656.496	649.158	640.701	634.238	627.604	626.154	619.594	612.731	611.084	609.241	602.364	600.637	594.728	588.1	579.522	581.361	579.737	578.153	571.088	564.744	562.973	556.726	550.183	549.132	547.542	539.896	533.476	503.558
672.518	665.174	657.844	657.074	649.73	641.264	634.798	628.159	626.706	620.142	613.274	611.623	609.775	602.893	601.162	595.25	588.618	580.032	581.875	580.247	578.659	571.589	565.241	563.466	557.215	550.669	549.614	548.021	540.369	533.944	504.001
673.11	665.76	658.423	657.651	650.301	641.827	635.357	628.714	627.257	620.689	613.817	612.161	610.309	603.422	601.686	595.773	589.136	580.541	582.389	580.757	579.165	572.089	565.739	563.959	557.705	551.154	550.097	548.499	540.841	534.412	504.445
673.701	666.345	659.003	658.229	650.873	642.39	635.916	629.269	627.809	621.237	614.359	612.7	610.843	603.952	602.211	596.295	589.655	581.05	582.903	581.267	579.67	572.59	566.236	564.451	558.194	551.64	550.58	548.978	541.313	534.881	504.888
674.292	666.931	659.582	658.807	651.445	642.953	636.476	629.824	628.36	621.784	614.902	613.238	611.377	604.481	602.736	596.817	590.173	581.559	583.417	581.776	580.176	573.09	566.733	564.944	558.684	552.125	551.063	549.457	541.785	535.349	505.331
674.884	667.516	660.162	659.384	652.017	643.516	637.035	630.379	628.912	622.332	615.445	613.777	611.911	605.01	603.26	597.34	590.691	582.069	583.93	582.286	580.682	573.591	567.23	565.436	559.173	552.61	551.546	549.936	542.257	535.818	505.774
675.475	668.102	660.741	659.962	652.588	644.078	637.594	630.934	629.463	622.879	615.987	614.315	612.445	605.539	603.785	597.862	591.209	582.578	584.444	582.796	581.187	574.091	567.727	565.929	559.662	553.096	552.028	550.414	542.729	536.286	506.217
676.066	668.687	661.321	660.539	653.16	644.641	638.153	631.489	630.014	623.426	616.53	614.854	612.978	606.068	604.31	598.384	591.727	583.087	584.958	583.305	581.693	574.591	568.223	566.421	560.151	553.581	552.511	550.893	543.2	536.754	506.66
676.657	669.272	661.9	661.117	653.731	645.204	638.712	632.044	630.565	623.974	617.072	615.392	613.512	606.597	604.834	598.907	592.246	583.596	585.471	583.815	582.198	575.092	568.72	566.913	560.641	554.066	552.994	551.371	543.672	537.223	507.103
677.249	669.857	662.48	661.694	654.303	645.767	639.271	632.599	631.116	624.521	617.615	615.93	614.046	607.125	605.359	599.429	592.764	584.105	585.985	584.324	582.704	575.592	569.217	567.406	561.13	554.552	553.476	551.85	544.144	537.691	507.546
677.84	670.442	663.059	662.271	654.874	646.329	639.83	633.154	631.668	625.068	618.157	616.469	614.579	607.654	605.883	599.951	593.282	584.613	586.499	584.834	583.209	576.092	569.714	567.898	561.619	555.037	553.959	552.328	544.616	538.159	507.989
678.431	671.028	663.638	662.849	655.445	646.892	640.389	633.708	632.219	625.615	618.7	617.007	615.113	608.183	606.407	600.473	593.8	585.122	587.012	585.343	583.715	576.592	570.211	568.39	562.108	555.522	554.441	552.807	545.088	538.627	508.432
679.022	671.613	664.217	663.426	656.017	647.454	640.948	634.263	632.77	626.162	619.242	617.545	615.646	608.712	606.932	600.995	594.317	585.631	587.526	585.852	584.22	577.092	570.707	568.882	562.597	556.007	554.924	553.285	545.559	539.095	508.875
679.613	672.198	664.796	664.003	656.588	648.017	641.506	634.818	633.321	626.709	619.784	618.083	616.18	609.24	607.456	601.517	594.835	586.14	588.039	586.362	584.725	577.592	571.204	569.375	563.086	556.492	555.406	553.764	546.031	539.563	509.318
680.204	672.783	665.375	664.58	657.159	648.579	642.065	635.372	633.872	627.256	620.326	618.621	616.713	609.769	607.98	602.039	595.353	586.649	588.553	586.871	585.231	578.092	571.701	569.867	563.575	556.977	555.888	554.242	546.503	540.031	509.761
680.794	673.367	665.954	665.157	657.73	649.142	642.624	635.927	634.422	627.803	620.869	619.159	617.246	610.298	608.504	602.561	595.871	587.157	589.066	587.38	585.736	578.592	572.197	570.359	564.064	557.462	556.371	554.72	546.974	540.499	510.204
681.385	673.952	666.533	665.734	658.301	649.704	643.182	636.481	634.973	628.35	621.411	619.697	617.78	610.826	609.029	603.083	596.389	587.666	589.579	587.889	586.241	579.092	572.694	570.851	564.553	557.947	556.853	555.198	547.446	540.967	510.646
681.976	674.537	667.112	666.311	658.872	650.266	643.741	637.036	635.524	628.897	621.953	620.235	618.313	611.355	609.553	603.604	596.906	588.175	590.092	588.399	586.746	579.592	573.19	571.343	565.042	558.432	557.335	555.677	547.917	541.435	511.089
682.566	675.122	667.691	666.888	659.443	650.828	644.3	637.59	636.075	629.443	622.495	620.773	618.846	611.883	610.077	604.126	597.424	588.683	590.606	588.908	587.251	580.092	573.687	571.835	565.53	558.917	557.817	556.155	548.389	541.903	511.532
683.157	675.707	668.27	667.465	660.014	651.391	644.858	638.144	636.625	629.99	623.037	621.311	619.379	612.411	610.601	604.648	597.941	589.192	591.119	589.417	587.756	580.592	574.183	572.327	566.019	559.402	558.299	556.633	548.86	542.371	511.974
683.748	676.291	668.849	668.042	660.585	651.953	645.416	638.699	637.176	630.537	623.579	621.848	619.912	612.94	611.125	605.17	598.459	589.7	591.632	589.926	588.261	581.092	574.679	572.818	566.508	559.886	558.782	557.111	549.331	542.838	512.417
684.338	676.876	669.427	668.618	661.156	652.515	645.975	639.253	637.727	631.083	624.121	622.386	620.445	613.468	611.649	605.691	598.976	590.209	592.145	590.435	588.766	581.591	575.176	573.31	566.996	560.371	559.264	557.589	549.803	543.306	512.859
684.929	677.46	670.006	669.195	661.727	653.077	646.533	639.807	638.277	631.63	624.663	622.924	620.978	613.996	612.173	606.213	599.494	590.717	592.658	590.944	589.271	582.091	575.672	573.802	567.485	560.856	559.746	558.067	550.274	543.774	513.302
685.519	678.045	670.585	669.772	662.298	653.639	647.091	640.361	638.828	632.177	625.204	623.461	621.511	614.525	612.696	606.734	600.011	591.225	593.171	591.453	589.776	582.591	576.168	574.294	567.974	561.341	560.228	558.545	550.745	544.241	513.744
686.109	678.629	671.163	670.348	662.868	654.201	647.65	640.915	639.378	632.723	625.746	623.999	622.044	615.053	613.22	607.256	600.529	591.734	593.684	591.961	590.281	583.09	576.664	574.786	568.462	561.825	560.71	559.023	551.217	544.709	514.187
686.7	679.214	671.742	670.925	663.439	654.763	648.208	641.469	639.928	633.269	626.288	624.537	622.577	615.581	613.744	607.777	601.046	592.242	594.197	592.47	590.786	583.59	577.161	575.277	568.951	562.31	561.192	559.501	551.688	545.177	514.629
687.29	679.798	672.32	671.501	664.01	655.325	648.766	642.023	640.479	633.816	626.83	625.074	623.11	616.109	614.268	608.299	601.563	592.75	594.71	592.979	591.29	584.089	577.657	575.769	569.439	562.794	561.673	559.979	552.159	545.644	515.072
687.88	680.382	672.899	672.078	664.58	655.886	649.324	642.577	641.029	634.362	627.371	625.612	623.643	616.637	614.791	608.82	602.081	593.258	595.223	593.488	591.795	584.589	578.153	576.26	569.928	563.279	562.155	560.457	552.63	546.112	515.514
688.47	680.966	673.477	672.654	665.151	656.448	649.882	643.131	641.579	634.908	627.913	626.149	624.176	617.165	615.315	609.341	602.598	593.766	595.736	593.996	592.3	585.088	578.649	576.752	570.416	563.763	562.637	560.934	553.101	546.579	515.956
689.06	681.551	674.055	673.231	665.721	657.01	650.44	643.685	642.129	635.455	628.454	626.686	624.708	617.693	615.838	609.863	603.115	594.275	596.248	594.505	592.804	585.588	579.145	577.243	570.904	564.248	563.119	561.412	553.572	547.046	516.399
689.65	682.135	674.633	673.807	666.291	657.571	650.998	644.239	642.68	636.001	628.996	627.224	625.241	618.221	616.362	610.384	603.632	594.783	596.761	595.014	593.309	586.087	579.641	577.735	571.393	564.732	563.601	561.89	554.043	547.514	516.841
690.24	682.719	675.212	674.383	666.862	658.133	651.556	644.793	643.23	636.547	629.537	627.761	625.774	618.749	616.885	610.905	604.149	595.291	597.274	595.522	593.813	586.586	580.137	578.226	571.881	565.216	564.082	562.367	554.514	547.981	517.283
690.83	683.303	675.79	674.959	667.432	658.695	652.114	645.347	643.78	637.093	630.079	628.298	626.306	619.276	617.409	611.426	604.666	595.799	597.786	596.031	594.318	587.085	580.632	578.718	572.369	565.701	564.564	562.845	554.985	548.449	517.725
691.42	683.887	676.368	675.536	668.002	659.256	652.672	645.9	644.33	637.639	630.62	628.835	626.839	619.804	617.932	611.947	605.183	596.306	598.299	596.539	594.822	587.585	581.128	579.209	572.857	566.185	565.046	563.323	555.456	548.916	518.167
692.01	684.471	676.946	676.112	668.572	659.818	653.23	646.454	644.88	638.185	631.161	629.372	627.371	620.332	618.456	612.468	605.7	596.814	598.811	597.048	595.327	588.084	581.624	579.7	573.345	566.669	565.527	563.8	555.927	549.383	518.609
692.6	685.055	677.524	676.688	669.143	660.379	653.787	647.007	645.43	638.731	631.703	629.91	627.904	620.86	618.979	612.989	606.217	597.322	599.324	597.556	595.831	588.583	582.12	580.192	573.834	567.153	566.009	564.278	556.397	549.85	519.052
693.19	685.639	678.102	677.264	669.713	660.94	654.345	647.561	645.98	639.277	632.244	630.447	628.436	621.387	619.502	613.51	606.734	597.83	599.836	598.064	596.336	589.082	582.615	580.683	574.322	567.638	566.49	564.755	556.868	550.317	519.494
693.779	686.222	678.68	677.84	670.283	661.502	654.903	648.114	646.529	639.823	632.785	630.984	628.968	621.915	620.026	614.031	607.251	598.338	600.349	598.573	596.84	589.581	583.111	581.174	574.81	568.122	566.972	565.233	557.339	550.785	519.936
694.369	686.806	679.258	678.416	670.853	662.063	655.46	648.668	647.079	640.369	633.326	631.521	629.501	622.442	620.549	614.552	607.767	598.845	600.861	599.081	597.344	590.08	583.607	581.665	575.298	568.606	567.453	565.71	557.81	551.252	520.378
694.958	687.39	679.836	678.992	671.423	662.624	656.018	649.221	647.629	640.915	633.867	632.057	630.033	622.97	621.072	615.073	608.284	599.353	601.373	599.589	597.848	590.579	584.102	582.156	575.785	569.09	567.934	566.187	558.28	551.719	520.819
695.548	687.973	680.413	679.567	671.993	663.185	656.575	649.775	648.179	641.46	634.408	632.594	630.565	623.497	621.595	615.594	608.801	599.861	601.886	600.097	598.352	591.078	584.598	582.647	576.273	569.574	568.416	566.665	558.751	552.186	521.261
696.137	688.557	680.991	680.143	672.563	663.746	657.133	650.328	648.728	642.006	634.949	633.131	631.097	624.025	622.118	616.114	609.317	600.368	602.398	600.605	598.857	591.577	585.093	583.138	576.761	570.058	568.897	567.142	559.221	552.653	521.703
696.727	689.14	681.569	680.719	673.132	664.308	657.69	650.881	649.278	642.552	635.49	633.668	631.629	624.552	622.641	616.635	609.834	600.876	602.91	601.113	599.361	592.076	585.589	583.629	577.249	570.542	569.378	567.619	559.692	553.12	522.145
697.316	689.724	682.146	681.295	673.702	664.869	658.247	651.434	649.827	643.097	636.031	634.205	632.161	625.08	623.164	617.156	610.351	601.383	603.422	601.622	599.865	592.575	586.084	584.12	577.737	571.026	569.859	568.096	560.162	553.586	522.587
697.906	690.307	682.724	681.87	674.272	665.43	658.805	651.988	650.377	643.643	636.572	634.741	632.693	625.607	623.687	617.676	610.867	601.891	603.934	602.13	600.369	593.073	586.58	584.611	578.225	571.509	570.341	568.573	560.633	554.053	523.029
698.495	690.891	683.301	682.446	674.842	665.991	659.362	652.541	650.926	644.188	637.113	635.278	633.225	626.134	624.21	618.197	611.383	602.398	604.446	602.638	600.873	593.572	587.075	585.102	578.712	571.993	570.822	569.051	561.103	554.52	523.47
699.084	691.474	683.879	683.021	675.411	666.551	659.919	653.094	651.476	644.734	637.653	635.815	633.757	626.661	624.733	618.718	611.9	602.906	604.958	603.145	601.377	594.071	587.57	585.593	579.2	572.477	571.303	569.528	561.574	554.987	523.912
699.673	692.057	684.456	683.597	675.981	667.112	660.476	653.647	652.025	645.279	638.194	636.351	634.289	627.188	625.255	619.238	612.416	603.413	605.47	603.653	601.88	594.57	588.065	586.084	579.688	572.961	571.784	570.005	562.044	555.454	524.354
700.262	692.641	685.034	684.172	676.55	667.673	661.033	654.2	652.574	645.825	638.735	636.888	634.821	627.716	625.778	619.759	612.933	603.92	605.982	604.161	602.384	595.068	588.561	586.574	580.175	573.444	572.265	570.482	562.514	555.92	524.795
700.852	693.224	685.611	684.748	677.12	668.234	661.59	654.753	653.124	646.37	639.275	637.424	635.353	628.243	626.301	620.279	613.449	604.428	606.494	604.669	602.888	595.567	589.056	587.065	580.663	573.928	572.746	570.959	562.985	556.387	525.237
701.441	693.807	686.188	685.323	677.689	668.795	662.147	655.306	653.673	646.915	639.816	637.961	635.885	628.77	626.824	620.799	613.965	604.935	607.006	605.177	603.392	596.065	589.551	587.556	581.15	574.412	573.227	571.436	563.455	556.854	525.678
702.03	694.39	686.765	685.898	678.259	669.355	662.704	655.858	654.222	647.461	640.357	638.497	636.416	629.297	627.346	621.32	614.481	605.442	607.518	605.684	603.896	596.564	590.046	588.046	581.638	574.895	573.708	571.912	563.925	557.32	526.12
702.618	694.973	687.343	686.473	678.828	669.916	663.261	656.411	654.771	648.006	640.897	639.033	636.948	629.824	627.869	621.84	614.998	605.949	608.03	606.192	604.399	597.062	590.541	588.537	582.125	575.379	574.189	572.389	564.395	557.787	526.561
703.207	695.556	687.92	687.049	679.397	670.476	663.818	656.964	655.32	648.551	641.437	639.57	637.48	630.35	628.391	622.36	615.514	606.456	608.542	606.7	604.903	597.561	591.036	589.027	582.613	575.862	574.669	572.866	564.865	558.253	527.003
703.796	696.139	688.497	687.624	679.966	671.037	664.375	657.517	655.869	649.096	641.978	640.106	638.011	630.877	628.914	622.88	616.03	606.963	609.053	607.207	605.406	598.059	591.531	589.518	583.1	576.346	575.15	573.343	565.335	558.72	527.444
704.385	696.722	689.074	688.199	680.536	671.597	664.932	658.069	656.418	649.641	642.518	640.642	638.543	631.404	629.436	623.401	616.546	607.47	609.565	607.715	605.91	598.557	592.026	590.008	583.587	576.829	575.631	573.82	565.805	559.186	527.885
704.974	697.305	689.651	688.774	681.105	672.158	665.488	658.622	656.967	650.186	643.059	641.178	639.074	631.931	629.959	623.921	617.062	607.977	610.076	608.222	606.413	599.056	592.521	590.499	584.074	577.312	576.112	574.296	566.275	559.653	528.327
705.562	697.887	690.228	689.349	681.674	672.718	666.045	659.175	657.516	650.731	643.599	641.714	639.606	632.458	630.481	624.441	617.578	608.484	610.588	608.73	606.917	599.554	593.016	590.989	584.562	577.796	576.592	574.773	566.745	560.119	528.768
706.151	698.47	690.805	689.924	682.243	673.278	666.602	659.727	658.065	651.276	644.139	642.25	640.137	632.984	631.003	624.961	618.094	608.991	611.1	609.237	607.42	600.052	593.511	591.479	585.049	578.279	577.073	575.25	567.215	560.586	529.209
706.74	699.053	691.381	690.499	682.812	673.839	667.158	660.28	658.614	651.821	644.679	642.786	640.669	633.511	631.526	625.481	618.61	609.498	611.611	609.745	607.924	600.55	594.005	591.97	585.536	578.762	577.554	575.726	567.685	561.052	529.651
707.328	699.635	691.958	691.074	683.381	674.399	667.715	660.832	659.163	652.366	645.219	643.322	641.2	634.038	632.048	626.001	619.125	610.005	612.123	610.252	608.427	601.048	594.5	592.46	586.023	579.246	578.034	576.203	568.155	561.518	530.092
707.917	700.218	692.535	691.648	683.95	674.959	668.271	661.384	659.711	652.911	645.759	643.858	641.731	634.564	632.57	626.521	619.641	610.511	612.634	610.759	608.93	601.547	594.995	592.95	586.51	579.729	578.515	576.679	568.625	561.984	530.533
708.505	700.801	693.112	692.223	684.519	675.519	668.828	661.937	660.26	653.455	646.3	644.394	642.263	635.091	633.092	627.04	620.157	611.018	613.145	611.267	609.434	602.045	595.49	593.44	586.997	580.212	578.995	577.156	569.095	562.451	530.974
709.093	701.383	693.688	692.798	685.087	676.079	669.384	662.489	660.809	654	646.84	644.93	642.794	635.617	633.614	627.56	620.673	611.525	613.657	611.774	609.937	602.543	595.984	593.931	587.484	580.695	579.476	577.632	569.564	562.917	531.415
709.682	701.966	694.265	693.372	685.656	676.64	669.941	663.041	661.357	654.545	647.38	645.466	643.325	636.144	634.136	628.08	621.188	612.031	614.168	612.281	610.44	603.041	596.479	594.421	587.971	581.178	579.956	578.108	570.034	563.383	531.856
710.27	702.548	694.841	693.947	686.225	677.2	670.497	663.593	661.906	655.089	647.919	646.002	643.856	636.67	634.658	628.6	621.704	612.538	614.679	612.788	610.943	603.539	596.973	594.911	588.458	581.661	580.437	578.585	570.504	563.849	532.297
710.858	703.13	695.418	694.522	686.794	677.759	671.053	664.146	662.454	655.634	648.459	646.537	644.387	637.196	635.18	629.119	622.22	613.045	615.19	613.295	611.446	604.036	597.468	595.401	588.945	582.144	580.917	579.061	570.974	564.315	532.738
711.446	703.713	695.994	695.096	687.362	678.319	671.61	664.698	663.003	656.178	648.999	647.073	644.918	637.723	635.702	629.639	622.735	613.551	615.702	613.802	611.949	604.534	597.962	595.891	589.432	582.627	581.397	579.537	571.443	564.781	533.179
712.035	704.295	696.571	695.671	687.931	678.879	672.166	665.25	663.551	656.723	649.539	647.609	645.449	638.249	636.224	630.159	623.251	614.058	616.213	614.309	612.452	605.032	598.457	596.381	589.919	583.11	581.877	580.014	571.913	565.247	533.62
712.623	704.877	697.147	696.245	688.499	679.439	672.722	665.802	664.1	657.267	650.079	648.144	645.98	638.775	636.746	630.678	623.766	614.564	616.724	614.816	612.955	605.53	598.951	596.871	590.405	583.593	582.358	580.49	572.382	565.713	534.061
713.211	705.459	697.723	696.819	689.068	679.999	673.278	666.354	664.648	657.812	650.618	648.68	646.511	639.301	637.268	631.198	624.282	615.071	617.235	615.323	613.458	606.028	599.446	597.361	590.892	584.076	582.838	580.966	572.852	566.179	534.502
713.799	706.041	698.3	697.394	689.636	680.559	673.834	666.906	665.196	658.356	651.158	649.215	647.042	639.827	637.79	631.717	624.797	615.577	617.746	615.83	613.961	606.525	599.94	597.851	591.379	584.558	583.318	581.442	573.321	566.645	534.943
714.387	706.623	698.876	697.968	690.205	681.118	674.39	667.458	665.745	658.9	651.698	649.751	647.573	640.354	638.311	632.237	625.312	616.083	618.257	616.337	614.464	607.023	600.434	598.34	591.866	585.041	583.798	581.918	573.791	567.111	535.384
714.975	707.205	699.452	698.542	690.773	681.678	674.946	668.009	666.293	659.445	652.237	650.286	648.104	640.88	638.833	632.756	625.828	616.59	618.768	616.844	614.967	607.521	600.928	598.83	592.352	585.524	584.278	582.394	574.26	567.576	535.824
715.562	707.787	700.028	699.116	691.341	682.238	675.502	668.561	666.841	659.989	652.777	650.822	648.634	641.406	639.355	633.276	626.343	617.096	619.279	617.351	615.47	608.018	601.423	599.32	592.839	586.007	584.758	582.87	574.729	568.042	536.265
716.15	708.369	700.604	699.691	691.91	682.797	676.058	669.113	667.389	660.533	653.316	651.357	649.165	641.932	639.876	633.795	626.858	617.602	619.789	617.857	615.973	608.516	601.917	599.81	593.325	586.489	585.238	583.346	575.199	568.508	536.706
716.738	708.951	701.18	700.265	692.478	683.357	676.614	669.665	667.937	661.077	653.856	651.892	649.696	642.457	640.398	634.314	627.373	618.108	620.3	618.364	616.475	609.013	602.411	600.299	593.812	586.972	585.718	583.822	575.668	568.974	537.146
717.326	709.533	701.756	700.839	693.046	683.916	677.169	670.216	668.485	661.621	654.395	652.428	650.226	642.983	640.92	634.833	627.888	618.614	620.811	618.871	616.978	609.511	602.905	600.789	594.298	587.455	586.198	584.298	576.137	569.439	537.587
717.913	710.115	702.332	701.413	693.614	684.476	677.725	670.768	669.033	662.165	654.935	652.963	650.757	643.509	641.441	635.353	628.404	619.12	621.322	619.378	617.481	610.008	603.399	601.278	594.785	587.937	586.678	584.774	576.606	569.905	538.028
718.501	710.697	702.908	701.987	694.182	685.035	678.281	671.32	669.581	662.709	655.474	653.498	651.287	644.035	641.963	635.872	628.919	619.626	621.832	619.884	617.983	610.506	603.893	601.768	595.271	588.42	587.158	585.25	577.076	570.37	538.468
719.089	711.278	703.484	702.561	694.75	685.594	678.837	671.871	670.129	663.253	656.013	654.033	651.818	644.561	642.484	636.391	629.434	620.132	622.343	620.391	618.486	611.003	604.387	602.257	595.758	588.902	587.638	585.726	577.545	570.836	538.909
719.676	711.86	704.06	703.134	695.318	686.154	679.392	672.423	670.677	663.797	656.552	654.568	652.348	645.087	643.005	636.91	629.949	620.638	622.854	620.897	618.988	611.5	604.881	602.747	596.244	589.385	588.117	586.202	578.014	571.302	539.349
720.264	712.442	704.635	703.708	695.886	686.713	679.948	672.974	671.225	664.341	657.092	655.103	652.879	645.612	643.527	637.429	630.464	621.144	623.364	621.404	619.491	611.998	605.375	603.236	596.73	589.867	588.597	586.677	578.483	571.767	539.79
720.851	713.023	705.211	704.282	696.454	687.272	680.503	673.526	671.772	664.885	657.631	655.638	653.409	646.138	644.048	637.948	630.978	621.65	623.875	621.91	619.993	612.495	605.869	603.726	597.216	590.349	589.077	587.153	578.952	572.232	540.23
721.438	713.605	705.787	704.856	697.022	687.831	681.059	674.077	672.32	665.429	658.17	656.173	653.939	646.663	644.569	638.467	631.493	622.156	624.385	622.416	620.496	612.992	606.362	604.215	597.703	590.832	589.557	587.629	579.421	572.698	540.671
722.026	714.186	706.362	705.429	697.59	688.39	681.614	674.628	672.868	665.973	658.709	656.708	654.47	647.189	645.09	638.986	632.008	622.662	624.896	622.923	620.998	613.489	606.856	604.704	598.189	591.314	590.036	588.104	579.89	573.163	541.111
722.613	714.767	706.938	706.003	698.157	688.949	682.17	675.18	673.415	666.516	659.248	657.243	655	647.715	645.612	639.505	632.523	623.168	625.406	623.429	621.5	613.986	607.35	605.194	598.675	591.796	590.516	588.58	580.359	573.629	541.551
723.2	715.349	707.514	706.577	698.725	689.508	682.725	675.731	673.963	667.06	659.787	657.778	655.53	648.24	646.133	640.024	633.038	623.673	625.916	623.935	622.003	614.483	607.844	605.683	599.161	592.278	590.995	589.056	580.828	574.094	541.992
723.787	715.93	708.089	707.15	699.293	690.067	683.28	676.282	674.51	667.604	660.326	658.313	656.06	648.765	646.654	640.542	633.552	624.179	626.427	624.442	622.505	614.98	608.337	606.172	599.647	592.761	591.475	589.531	581.297	574.559	542.432
724.375	716.511	708.664	707.724	699.86	690.626	683.835	676.833	675.058	668.147	660.865	658.847	656.59	649.291	647.175	641.061	634.067	624.685	626.937	624.948	623.007	615.477	608.831	606.661	600.133	593.243	591.954	590.007	581.765	575.024	542.872
724.962	717.093	709.24	708.297	700.428	691.185	684.391	677.384	675.605	668.691	661.404	659.382	657.121	649.816	647.696	641.58	634.582	625.19	627.447	625.454	623.509	615.974	609.325	607.15	600.619	593.725	592.434	590.482	582.234	575.49	543.312
725.549	717.674	709.815	708.871	700.996	691.744	684.946	677.935	676.153	669.234	661.942	659.917	657.651	650.342	648.217	642.099	635.096	625.696	627.958	625.96	624.011	616.471	609.818	607.64	601.105	594.207	592.913	590.957	582.703	575.955	543.752
726.136	718.255	710.39	709.444	701.563	692.303	685.501	678.486	676.7	669.778	662.481	660.451	658.181	650.867	648.738	642.617	635.611	626.202	628.468	626.466	624.514	616.968	610.312	608.129	601.591	594.689	593.393	591.433	583.172	576.42	544.193
726.723	718.836	710.966	710.017	702.13	692.862	686.056	679.037	677.248	670.321	663.02	660.986	658.711	651.392	649.259	643.136	636.125	626.707	628.978	626.972	625.016	617.465	610.805	608.618	602.077	595.171	593.872	591.908	583.64	576.885	544.633
727.309	719.417	711.541	710.591	702.698	693.42	686.611	679.588	677.795	670.864	663.559	661.521	659.24	651.917	649.779	643.654	636.64	627.213	629.488	627.478	625.518	617.962	611.299	609.107	602.563	595.653	594.351	592.384	584.109	577.35	545.073
727.896	719.998	712.116	711.164	703.265	693.979	687.166	680.139	678.342	671.408	664.097	662.055	659.77	652.442	650.3	644.173	637.154	627.718	629.998	627.984	626.02	618.459	611.792	609.596	603.049	596.135	594.831	592.859	584.578	577.815	545.513
728.483	720.579	712.691	711.737	703.832	694.538	687.721	680.69	678.889	671.951	664.636	662.59	660.3	652.967	650.821	644.692	637.669	628.223	630.508	628.49	626.522	618.956	612.285	610.085	603.534	596.617	595.31	593.334	585.046	578.28	545.953
729.07	721.16	713.266	712.31	704.4	695.096	688.276	681.241	679.437	672.494	665.174	663.124	660.83	653.493	651.342	645.21	638.183	628.729	631.018	628.996	627.024	619.452	612.779	610.573	604.02	597.099	595.789	593.809	585.515	578.745	546.393
729.657	721.741	713.841	712.883	704.967	695.655	688.831	681.791	679.984	673.038	665.713	663.658	661.36	654.018	651.863	645.728	638.697	629.234	631.528	629.502	627.525	619.949	613.272	611.062	604.506	597.58	596.268	594.284	585.983	579.21	546.833
730.243	722.321	714.416	713.456	705.534	696.213	689.386	682.342	680.531	673.581	666.251	664.193	661.889	654.543	652.383	646.247	639.212	629.739	632.038	630.008	628.027	620.446	613.765	611.551	604.991	598.062	596.747	594.76	586.452	579.675	547.273
730.83	722.902	714.991	714.029	706.101	696.772	689.94	682.893	681.078	674.124	666.79	664.727	662.419	655.068	652.904	646.765	639.726	630.245	632.548	630.514	628.529	620.942	614.259	612.04	605.477	598.544	597.227	595.235	586.92	580.14	547.713
731.417	723.483	715.566	714.602	706.668	697.33	690.495	683.444	681.625	674.667	667.328	665.261	662.949	655.592	653.424	647.283	640.24	630.75	633.058	631.019	629.031	621.439	614.752	612.529	605.963	599.026	597.706	595.71	587.389	580.605	548.152
732.003	724.064	716.141	715.175	707.235	697.888	691.05	683.994	682.172	675.21	667.867	665.795	663.478	656.117	653.945	647.802	640.754	631.255	633.567	631.525	629.533	621.935	615.245	613.017	606.448	599.507	598.185	596.185	587.857	581.07	548.592
732.59	724.644	716.716	715.748	707.802	698.447	691.605	684.545	682.719	675.753	668.405	666.33	664.008	656.642	654.465	648.32	641.268	631.76	634.077	632.031	630.034	622.432	615.738	613.506	606.934	599.989	598.664	596.66	588.325	581.534	549.032
733.176	725.225	717.29	716.321	708.369	699.005	692.159	685.095	683.265	676.296	668.943	666.864	664.537	657.167	654.986	648.838	641.782	632.265	634.587	632.536	630.536	622.928	616.231	613.995	607.419	600.471	599.143	597.135	588.794	581.999	549.472
733.762	725.805	717.865	716.894	708.936	699.563	692.714	685.646	683.812	676.839	669.481	667.398	665.067	657.692	655.506	649.356	642.296	632.77	635.096	633.042	631.037	623.425	616.724	614.483	607.905	600.952	599.622	597.61	589.262	582.464	549.912
734.349	726.386	718.44	717.466	709.503	700.121	693.268	686.196	684.359	677.382	670.02	667.932	665.596	658.216	656.027	649.874	642.81	633.275	635.606	633.548	631.539	623.921	617.217	614.972	608.39	601.434	600.1	598.085	589.73	582.928	550.351
734.935	726.966	719.014	718.039	710.07	700.68	693.823	686.746	684.906	677.924	670.558	668.466	666.126	658.741	656.547	650.392	643.324	633.78	636.116	634.053	632.041	624.417	617.71	615.46	608.876	601.915	600.579	598.559	590.198	583.393	550.791
735.521	727.547	719.589	718.612	710.637	701.238	694.377	687.297	685.453	678.467	671.096	669	666.655	659.266	657.067	650.91	643.838	634.285	636.625	634.559	632.542	624.914	618.203	615.949	609.361	602.397	601.058	599.034	590.667	583.858	551.231
736.108	728.127	720.163	719.184	711.204	701.796	694.932	687.847	685.999	679.01	671.634	669.534	667.184	659.79	657.588	651.428	644.352	634.79	637.135	635.064	633.044	625.41	618.696	616.437	609.846	602.878	601.537	599.509	591.135	584.322	551.67
736.694	728.707	720.738	719.757	711.77	702.354	695.486	688.397	686.546	679.553	672.172	670.068	667.714	660.315	658.108	651.946	644.866	635.295	637.644	635.569	633.545	625.906	619.189	616.926	610.331	603.359	602.016	599.984	591.603	584.787	552.11
737.28	729.288	721.312	720.329	712.337	702.912	696.04	688.948	687.092	680.095	672.71	670.602	668.243	660.839	658.628	652.464	645.38	635.8	638.154	636.075	634.046	626.402	619.682	617.414	610.817	603.841	602.494	600.459	592.071	585.251	552.549
737.866	729.868	721.887	720.902	712.903	703.47	696.595	689.498	687.639	680.638	673.248	671.135	668.772	661.364	659.148	652.982	645.894	636.305	638.663	636.58	634.548	626.899	620.174	617.902	611.302	604.322	602.973	600.933	592.539	585.716	552.989
738.452	730.448	722.461	721.474	713.47	704.028	697.149	690.048	688.185	681.181	673.786	671.669	669.301	661.888	659.668	653.5	646.407	636.809	639.173	637.085	635.049	627.395	620.667	618.391	611.787	604.803	603.452	601.408	593.007	586.18	553.428
739.038	731.028	723.035	722.047	714.037	704.586	697.703	690.598	688.732	681.723	674.324	672.203	669.83	662.413	660.188	654.018	646.921	637.314	639.682	637.591	635.55	627.891	621.16	618.879	612.272	605.285	603.93	601.882	593.475	586.644	553.868
739.624	731.608	723.61	722.619	714.603	705.143	698.257	691.148	689.278	682.266	674.862	672.737	670.359	662.937	660.708	654.535	647.435	637.819	640.191	638.096	636.052	628.387	621.653	619.367	612.757	605.766	604.409	602.357	593.943	587.109	554.307
740.21	732.188	724.184	723.191	715.169	705.701	698.811	691.698	689.825	682.808	675.399	673.27	670.888	663.461	661.228	655.053	647.948	638.323	640.7	638.601	636.553	628.883	622.145	619.855	613.242	606.247	604.888	602.832	594.411	587.573	554.747
740.796	732.768	724.758	723.763	715.736	706.259	699.365	692.248	690.371	683.351	675.937	673.804	671.417	663.986	661.748	655.571	648.462	638.828	641.21	639.106	637.054	629.379	622.638	620.343	613.727	606.728	605.366	603.306	594.879	588.037	555.186
741.381	733.348	725.332	724.336	716.302	706.817	699.919	692.798	690.917	683.893	676.475	674.338	671.946	664.51	662.268	656.088	648.976	639.333	641.719	639.611	637.555	629.875	623.13	620.832	614.212	607.209	605.845	603.781	595.346	588.502	555.625
741.967	733.928	725.906	724.908	716.869	707.374	700.473	693.348	691.464	684.435	677.012	674.871	672.475	665.034	662.788	656.606	649.489	639.837	642.228	640.116	638.056	630.371	623.623	621.32	614.697	607.691	606.323	604.255	595.814	588.966	556.065
742.553	734.508	726.48	725.48	717.435	707.932	701.027	693.898	692.01	684.978	677.55	675.405	673.004	665.558	663.308	657.124	650.003	640.342	642.737	640.621	638.557	630.867	624.115	621.808	615.182	608.172	606.801	604.729	596.282	589.43	556.504
743.139	735.088	727.054	726.052	718.001	708.489	701.581	694.447	692.556	685.52	678.088	675.938	673.533	666.083	663.828	657.641	650.516	640.846	643.246	641.126	639.058	631.363	624.608	622.296	615.667	608.653	607.28	605.204	596.75	589.894	556.943
743.724	735.668	727.628	726.624	718.567	709.047	702.135	694.997	693.102	686.062	678.625	676.472	674.062	666.607	664.347	658.159	651.029	641.35	643.755	641.631	639.559	631.858	625.1	622.784	616.152	609.134	607.758	605.678	597.218	590.358	557.382
744.31	736.247	728.202	727.196	719.133	709.604	702.689	695.547	693.648	686.604	679.163	677.005	674.591	667.131	664.867	658.676	651.543	641.855	644.264	642.136	640.06	632.354	625.593	623.272	616.637	609.615	608.236	606.153	597.685	590.823	557.821
744.895	736.827	728.776	727.768	719.699	710.162	703.243	696.097	694.194	687.146	679.7	677.538	675.119	667.655	665.387	659.193	652.056	642.359	644.773	642.641	640.561	632.85	626.085	623.76	617.122	610.095	608.715	606.627	598.153	591.287	558.261
745.481	737.407	729.35	728.34	720.266	710.719	703.796	696.646	694.74	687.689	680.238	678.072	675.648	668.179	665.907	659.711	652.569	642.864	645.282	643.146	641.062	633.346	626.577	624.248	617.606	610.576	609.193	607.101	598.62	591.751	558.7
746.066	737.986	729.924	728.912	720.832	711.277	704.35	697.196	695.286	688.231	680.775	678.605	676.177	668.703	666.426	660.228	653.083	643.368	645.791	643.651	641.563	633.841	627.07	624.735	618.091	611.057	609.671	607.575	599.088	592.215	559.139
746.652	738.566	730.497	729.484	721.397	711.834	704.904	697.745	695.832	688.773	681.312	679.138	676.705	669.227	666.946	660.745	653.596	643.872	646.3	644.156	642.064	634.337	627.562	625.223	618.576	611.538	610.149	608.049	599.556	592.679	559.578
747.237	739.145	731.071	730.055	721.963	712.391	705.457	698.295	696.378	689.315	681.85	679.671	677.234	669.75	667.465	661.263	654.109	644.376	646.809	644.66	642.564	634.832	628.054	625.711	619.061	612.019	610.627	608.524	600.023	593.143	560.017
747.822	739.725	731.645	730.627	722.529	712.948	706.011	698.844	696.924	689.857	682.387	680.204	677.762	670.274	667.985	661.78	654.622	644.88	647.317	645.165	643.065	635.328	628.546	626.199	619.545	612.5	611.106	608.998	600.491	593.607	560.456
748.408	740.304	732.218	731.199	723.095	713.506	706.564	699.394	697.47	690.398	682.924	680.738	678.291	670.798	668.504	662.297	655.135	645.385	647.826	645.67	643.566	635.824	629.039	626.686	620.03	612.98	611.584	609.472	600.958	594.07	560.895
748.993	740.884	732.792	731.77	723.661	714.063	707.118	699.943	698.016	690.94	683.461	681.271	678.819	671.322	669.024	662.814	655.648	645.889	648.335	646.174	644.067	636.319	629.531	627.174	620.514	613.461	612.062	609.946	601.425	594.534	561.334
749.578	741.463	733.366	732.342	724.227	714.62	707.671	700.493	698.561	691.482	683.999	681.804	679.348	671.846	669.543	663.331	656.161	646.393	648.844	646.679	644.567	636.814	630.023	627.662	620.999	613.942	612.54	610.42	601.893	594.998	561.773
750.163	742.042	733.939	732.914	724.792	715.177	708.225	701.042	699.107	692.024	684.536	682.337	679.876	672.369	670.062	663.848	656.674	646.897	649.352	647.184	645.068	637.31	630.515	628.149	621.483	614.422	613.018	610.894	602.36	595.462	562.212
750.748	742.622	734.512	733.485	725.358	715.734	708.778	701.591	699.653	692.566	685.073	682.87	680.405	672.893	670.582	664.365	657.187	647.401	649.861	647.688	645.568	637.805	631.007	628.637	621.968	614.903	613.496	611.368	602.827	595.926	562.65
751.333	743.201	735.086	734.057	725.924	716.291	709.331	702.141	700.198	693.107	685.61	683.403	680.933	673.417	671.101	664.883	657.7	647.905	650.369	648.193	646.069	638.301	631.499	629.125	622.452	615.383	613.974	611.842	603.295	596.389	563.089
751.918	743.78	735.659	734.628	726.489	716.848	709.885	702.69	700.744	693.649	686.147	683.935	681.461	673.94	671.62	665.399	658.213	648.409	650.878	648.697	646.569	638.796	631.991	629.612	622.937	615.864	614.451	612.316	603.762	596.853	563.528
752.503	744.359	736.233	735.199	727.055	717.405	710.438	703.239	701.289	694.191	686.684	684.468	681.989	674.464	672.14	665.916	658.726	648.913	651.386	649.202	647.07	639.291	632.483	630.099	623.421	616.344	614.929	612.79	604.229	597.317	563.967
753.088	744.938	736.806	735.771	727.62	717.962	710.991	703.788	701.835	694.732	687.221	685.001	682.518	674.987	672.659	666.433	659.239	649.416	651.895	649.706	647.57	639.787	632.975	630.587	623.905	616.825	615.407	613.263	604.696	597.78	564.405
753.673	745.517	737.379	736.342	728.186	718.518	711.544	704.337	702.38	695.274	687.758	685.534	683.046	675.511	673.178	666.95	659.752	649.92	652.403	650.21	648.071	640.282	633.466	631.074	624.389	617.305	615.885	613.737	605.164	598.244	564.844
754.258	746.096	737.952	736.913	728.751	719.075	712.098	704.886	702.926	695.815	688.295	686.067	683.574	676.034	673.697	667.467	660.264	650.424	652.912	650.715	648.571	640.777	633.958	631.562	624.874	617.786	616.363	614.211	605.631	598.707	565.283
754.843	746.675	738.525	737.485	729.317	719.632	712.651	705.435	703.471	696.357	688.831	686.599	684.102	676.557	674.216	667.984	660.777	650.928	653.42	651.219	649.071	641.272	634.45	632.049	625.358	618.266	616.84	614.685	606.098	599.171	565.722
755.428	747.254	739.099	738.056	729.882	720.189	713.204	705.984	704.016	696.898	689.368	687.132	684.63	677.081	674.735	668.501	661.29	651.432	653.928	651.723	649.572	641.767	634.942	632.536	625.842	618.746	617.318	615.158	606.565	599.635	566.16
756.012	747.833	739.672	738.627	730.447	720.745	713.757	706.533	704.562	697.44	689.905	687.665	685.158	677.604	675.254	669.017	661.802	651.935	654.437	652.227	650.072	642.262	635.434	633.024	626.326	619.227	617.796	615.632	607.032	600.098	566.599
756.597	748.412	740.245	739.198	731.013	721.302	714.31	707.082	705.107	697.981	690.442	688.197	685.686	678.127	675.773	669.534	662.315	652.439	654.945	652.732	650.572	642.757	635.925	633.511	626.81	619.707	618.273	616.106	607.499	600.561	567.037
757.182	748.991	740.818	739.769	731.578	721.859	714.863	707.631	705.652	698.522	690.978	688.73	686.214	678.651	676.292	670.051	662.828	652.943	655.453	653.236	651.072	643.252	636.417	633.998	627.295	620.187	618.751	616.579	607.966	601.025	567.476
757.766	749.569	741.391	740.34	732.143	722.415	715.415	708.18	706.197	699.064	691.515	689.262	686.742	679.174	676.811	670.567	663.34	653.446	655.961	653.74	651.572	643.747	636.908	634.485	627.779	620.667	619.228	617.053	608.433	601.488	567.914
758.351	750.148	741.963	740.911	732.708	722.972	715.968	708.728	706.743	699.605	692.051	689.795	687.27	679.697	677.33	671.084	663.853	653.95	656.47	654.244	652.073	644.242	637.4	634.972	628.263	621.147	619.706	617.526	608.9	601.952	568.353
758.935	750.727	742.536	741.482	733.273	723.528	716.521	709.277	707.288	700.146	692.588	690.327	687.798	680.22	677.848	671.6	664.365	654.453	656.978	654.748	652.573	644.737	637.892	635.46	628.747	621.627	620.183	618	609.367	602.415	568.791
759.52	751.305	743.109	742.053	733.838	724.085	717.074	709.826	707.833	700.687	693.125	690.859	688.325	680.743	678.367	672.117	664.878	654.957	657.486	655.252	653.073	645.232	638.383	635.947	629.231	622.108	620.661	618.473	609.833	602.878	569.23
760.104	751.884	743.682	742.624	734.403	724.641	717.627	710.374	708.378	701.228	693.661	691.392	688.853	681.266	678.886	672.633	665.39	655.46	657.994	655.756	653.573	645.727	638.875	636.434	629.714	622.588	621.138	618.947	610.3	603.341	569.668
760.689	752.463	744.255	743.195	734.968	725.197	718.179	710.923	708.923	701.77	694.197	691.924	689.381	681.789	679.405	673.15	665.902	655.963	658.502	656.26	654.073	646.222	639.366	636.921	630.198	623.068	621.616	619.42	610.767	603.805	570.106
761.273	753.041	744.827	743.766	735.533	725.754	718.732	711.472	709.468	702.311	694.734	692.456	689.908	682.312	679.923	673.666	666.415	656.467	659.01	656.764	654.573	646.716	639.857	637.408	630.682	623.548	622.093	619.894	611.234	604.268	570.545
761.857	753.619	745.4	744.336	736.098	726.31	719.285	712.02	710.013	702.852	695.27	692.989	690.436	682.835	680.442	674.182	666.927	656.97	659.518	657.268	655.073	647.211	640.349	637.895	631.166	624.028	622.57	620.367	611.7	604.731	570.983
762.441	754.198	745.973	744.907	736.663	726.866	719.837	712.569	710.558	703.393	695.807	693.521	690.964	683.358	680.961	674.699	667.439	657.473	660.026	657.772	655.572	647.706	640.84	638.382	631.65	624.507	623.048	620.84	612.167	605.194	571.421
763.026	754.776	746.545	745.478	737.228	727.422	720.39	713.117	711.102	703.934	696.343	694.053	691.491	683.881	681.479	675.215	667.951	657.977	660.533	658.275	656.072	648.201	641.331	638.868	632.134	624.987	623.525	621.313	612.634	605.657	571.859
763.61	755.355	747.118	746.048	737.793	727.979	720.942	713.666	711.647	704.474	696.879	694.585	692.019	684.404	681.998	675.731	668.464	658.48	661.041	658.779	656.572	648.695	641.823	639.355	632.617	625.467	624.002	621.787	613.1	606.12	572.298
764.194	755.933	747.69	746.619	738.358	728.535	721.495	714.214	712.192	705.015	697.415	695.117	692.546	684.927	682.516	676.247	668.976	658.983	661.549	659.283	657.072	649.19	642.314	639.842	633.101	625.947	624.479	622.26	613.567	606.583	572.736
764.778	756.511	748.263	747.189	738.922	729.091	722.047	714.762	712.737	705.556	697.951	695.649	693.074	685.449	683.035	676.764	669.488	659.486	662.057	659.787	657.572	649.684	642.805	640.329	633.585	626.427	624.957	622.733	614.034	607.046	573.174
765.362	757.089	748.835	747.76	739.487	729.647	722.6	715.311	713.281	706.097	698.488	696.181	693.601	685.972	683.553	677.28	670	659.989	662.565	660.29	658.071	650.179	643.296	640.816	634.068	626.907	625.434	623.206	614.5	607.509	573.612
765.946	757.668	749.408	748.33	740.052	730.203	723.152	715.859	713.826	706.638	699.024	696.713	694.129	686.495	684.071	677.796	670.512	660.493	663.072	660.794	658.571	650.673	643.788	641.302	634.552	627.386	625.911	623.679	614.967	607.972	574.05
766.53	758.246	749.98	748.901	740.616	730.759	723.704	716.407	714.371	707.178	699.56	697.245	694.656	687.017	684.59	678.312	671.024	660.996	663.58	661.298	659.071	651.168	644.279	641.789	635.035	627.866	626.388	624.153	615.433	608.435	574.488
767.114	758.824	750.552	749.471	741.181	731.315	724.257	716.955	714.915	707.719	700.096	697.777	695.183	687.54	685.108	678.828	671.536	661.499	664.088	661.801	659.57	651.662	644.77	642.276	635.519	628.346	626.865	624.626	615.9	608.898	574.926
767.698	759.402	751.124	750.042	741.745	731.871	724.809	717.503	715.46	708.26	700.632	698.309	695.711	688.063	685.626	679.344	672.048	662.002	664.595	662.305	660.07	652.157	645.261	642.762	636.003	628.825	627.342	625.099	616.366	609.361	575.364
768.282	759.98	751.697	750.612	742.31	732.426	725.361	718.052	716.004	708.8	701.168	698.841	696.238	688.585	686.145	679.86	672.56	662.505	665.103	662.808	660.569	652.651	645.752	643.249	636.486	629.305	627.819	625.572	616.832	609.824	575.802
768.866	760.558	752.269	751.182	742.874	732.982	725.913	718.6	716.549	709.341	701.704	699.373	696.765	689.108	686.663	680.376	673.072	663.008	665.61	663.312	661.069	653.146	646.243	643.735	636.969	629.785	628.296	626.045	617.299	610.287	576.24
769.449	761.136	752.841	751.752	743.438	733.538	726.465	719.148	717.093	709.882	702.24	699.905	697.292	689.63	687.181	680.892	673.583	663.51	666.118	663.815	661.568	653.64	646.734	644.222	637.453	630.264	628.773	626.518	617.765	610.749	576.678
770.033	761.714	753.413	752.322	744.003	734.094	727.017	719.696	717.638	710.422	702.775	700.436	697.819	690.153	687.699	681.408	674.095	664.013	666.625	664.318	662.068	654.134	647.225	644.708	637.936	630.744	629.25	626.99	618.231	611.212	577.116
770.617	762.292	753.985	752.893	744.567	734.649	727.569	720.244	718.182	710.962	703.311	700.968	698.346	690.675	688.217	681.924	674.607	664.516	667.133	664.822	662.567	654.628	647.716	645.195	638.42	631.223	629.727	627.463	618.698	611.675	577.554
771.2	762.869	754.557	753.463	745.131	735.205	728.121	720.792	718.726	711.503	703.847	701.5	698.874	691.198	688.735	682.439	675.119	665.019	667.64	665.325	663.067	655.123	648.206	645.681	638.903	631.703	630.203	627.936	619.164	612.137	577.992
771.784	763.447	755.129	754.033	745.696	735.761	728.673	721.34	719.271	712.043	704.383	702.031	699.401	691.72	689.253	682.955	675.63	665.522	668.147	665.828	663.566	655.617	648.697	646.168	639.386	632.182	630.68	628.409	619.63	612.6	578.43
772.367	764.025	755.701	754.603	746.26	736.316	729.225	721.887	719.815	712.584	704.919	702.563	699.928	692.242	689.771	683.471	676.142	666.025	668.655	666.332	664.065	656.111	649.188	646.654	639.869	632.661	631.157	628.882	620.096	613.063	578.868
772.951	764.603	756.273	755.173	746.824	736.872	729.777	722.435	720.359	713.124	705.454	703.095	700.455	692.765	690.289	683.987	676.654	666.527	669.162	666.835	664.565	656.605	649.679	647.141	640.353	633.141	631.634	629.355	620.562	613.525	579.305
773.534	765.18	756.845	755.743	747.388	737.427	730.329	722.983	720.903	713.664	705.99	703.626	700.981	693.287	690.807	684.502	677.165	667.03	669.669	667.338	665.064	657.099	650.17	647.627	640.836	633.62	632.11	629.827	621.029	613.988	579.743
774.118	765.758	757.417	756.313	747.952	737.983	730.881	723.531	721.447	714.205	706.525	704.158	701.508	693.809	691.325	685.018	677.677	667.533	670.177	667.841	665.563	657.593	650.66	648.113	641.319	634.099	632.587	630.3	621.495	614.45	580.181
774.701	766.335	757.988	756.883	748.516	738.538	731.433	724.079	721.991	714.745	707.061	704.689	702.035	694.331	691.843	685.534	678.188	668.035	670.684	668.345	666.062	658.087	651.151	648.599	641.802	634.579	633.064	630.773	621.961	614.913	580.619
775.285	766.913	758.56	757.452	749.08	739.094	731.984	724.626	722.536	715.285	707.597	705.22	702.562	694.853	692.361	686.049	678.7	668.538	671.191	668.848	666.561	658.581	651.642	649.086	642.285	635.058	633.54	631.245	622.427	615.375	581.056
775.868	767.49	759.132	758.022	749.644	739.649	732.536	725.174	723.08	715.825	708.132	705.752	703.089	695.375	692.879	686.565	679.211	669.04	671.698	669.351	667.061	659.075	652.132	649.572	642.768	635.537	634.017	631.718	622.893	615.838	581.494
776.451	768.068	759.704	758.592	750.208	740.204	733.088	725.721	723.624	716.365	708.667	706.283	703.616	695.897	693.396	687.08	679.723	669.543	672.205	669.854	667.56	659.569	652.623	650.058	643.251	636.016	634.493	632.191	623.359	616.3	581.931
777.034	768.645	760.275	759.162	750.772	740.76	733.64	726.269	724.167	716.905	709.203	706.815	704.142	696.42	693.914	687.596	680.234	670.045	672.712	670.357	668.059	660.063	653.113	650.544	643.734	636.496	634.97	632.663	623.825	616.763	582.369
777.618	769.223	760.847	759.731	751.336	741.315	734.191	726.817	724.711	717.445	709.738	707.346	704.669	696.942	694.432	688.111	680.746	670.548	673.219	670.86	668.558	660.557	653.604	651.03	644.217	636.975	635.446	633.136	624.291	617.225	582.807
778.201	769.8	761.418	760.301	751.9	741.87	734.743	727.364	725.255	717.985	710.274	707.877	705.196	697.464	694.949	688.626	681.257	671.05	673.726	671.363	669.057	661.051	654.094	651.516	644.7	637.454	635.923	633.608	624.756	617.687	583.244
778.784	770.377	761.99	760.871	752.464	742.425	735.294	727.912	725.799	718.525	710.809	708.408	705.722	697.985	695.467	689.142	681.768	671.552	674.233	671.866	669.556	661.545	654.585	652.002	645.183	637.933	636.399	634.081	625.222	618.15	583.682
779.367	770.955	762.561	761.44	753.027	742.98	735.846	728.459	726.343	719.065	711.344	708.939	706.249	698.507	695.985	689.657	682.28	672.055	674.74	672.369	670.055	662.038	655.075	652.488	645.666	638.412	636.876	634.553	625.688	618.612	584.119
779.95	771.532	763.133	762.01	753.591	743.536	736.397	729.006	726.887	719.605	711.88	709.471	706.775	699.029	696.502	690.172	682.791	672.557	675.247	672.871	670.553	662.532	655.566	652.974	646.149	638.891	637.352	635.025	626.154	619.074	584.557
780.533	772.109	763.704	762.579	754.155	744.091	736.949	729.554	727.431	720.145	712.415	710.002	707.302	699.551	697.02	690.688	683.302	673.059	675.754	673.374	671.052	663.026	656.056	653.46	646.632	639.37	637.829	635.498	626.62	619.536	584.994
781.116	772.686	764.276	763.149	754.718	744.646	737.5	730.101	727.974	720.685	712.95	710.533	707.828	700.073	697.537	691.203	683.813	673.562	676.261	673.877	671.551	663.52	656.546	653.946	647.115	639.849	638.305	635.97	627.085	619.999	585.431
781.699	773.263	764.847	763.718	755.282	745.201	738.051	730.648	728.518	721.225	713.485	711.064	708.355	700.595	698.055	691.718	684.324	674.064	676.768	674.38	672.05	664.013	657.037	654.432	647.597	640.328	638.781	636.442	627.551	620.461	585.869
782.282	773.84	765.418	764.287	755.846	745.756	738.603	731.196	729.062	721.764	714.02	711.595	708.881	701.116	698.572	692.233	684.835	674.566	677.274	674.882	672.549	664.507	657.527	654.918	648.08	640.807	639.257	636.915	628.017	620.923	586.306
782.865	774.417	765.989	764.857	756.409	746.31	739.154	731.743	729.605	722.304	714.555	712.126	709.408	701.638	699.09	692.748	685.347	675.068	677.781	675.385	673.048	665	658.017	655.404	648.563	641.285	639.734	637.387	628.482	621.385	586.743
783.448	774.994	766.561	765.426	756.973	746.865	739.705	732.29	730.149	722.844	715.09	712.657	709.934	702.16	699.607	693.264	685.858	675.57	678.288	675.888	673.546	665.494	658.507	655.889	649.045	641.764	640.21	637.859	628.948	621.847	587.181
784.03	775.571	767.132	765.995	757.536	747.42	740.256	732.837	730.692	723.383	715.625	713.188	710.46	702.681	700.124	693.779	686.369	676.072	678.794	676.39	674.045	665.988	658.998	656.375	649.528	642.243	640.686	638.331	629.414	622.309	587.618
784.613	776.148	767.703	766.565	758.099	747.975	740.808	733.384	731.236	723.923	716.16	713.719	710.987	703.203	700.642	694.294	686.88	676.575	679.301	676.893	674.544	666.481	659.488	656.861	650.011	642.722	641.162	638.804	629.879	622.771	588.055
785.196	776.725	768.274	767.134	758.663	748.53	741.359	733.931	731.779	724.463	716.695	714.249	711.513	703.725	701.159	694.809	687.391	677.077	679.808	677.396	675.042	666.975	659.978	657.347	650.493	643.201	641.638	639.276	630.345	623.233	588.492
785.778	777.302	768.845	767.703	759.226	749.085	741.91	734.478	732.323	725.002	717.23	714.78	712.039	704.246	701.676	695.324	687.901	677.579	680.314	677.898	675.541	667.468	660.468	657.832	650.976	643.679	642.114	639.748	630.81	623.695	588.93
786.361	777.879	769.416	768.272	759.789	749.639	742.461	735.025	732.866	725.542	717.765	715.311	712.565	704.768	702.193	695.839	688.412	678.081	680.821	678.401	676.039	667.961	660.958	658.318	651.458	644.158	642.59	640.22	631.276	624.157	589.367
786.944	778.456	769.987	768.841	760.353	750.194	743.012	735.572	733.409	726.081	718.3	715.842	713.092	705.289	702.711	696.354	688.923	678.583	681.327	678.903	676.538	668.455	661.448	658.804	651.941	644.637	643.066	640.692	631.741	624.619	589.804
787.526	779.032	770.558	769.41	760.916	750.749	743.563	736.119	733.953	726.621	718.835	716.372	713.618	705.811	703.228	696.868	689.434	679.084	681.834	679.406	677.036	668.948	661.938	659.289	652.423	645.115	643.542	641.164	632.207	625.081	590.241
788.109	779.609	771.129	769.979	761.479	751.303	744.114	736.666	734.496	727.16	719.369	716.903	714.144	706.332	703.745	697.383	689.945	679.586	682.34	679.908	677.535	669.441	662.428	659.775	652.906	645.594	644.018	641.636	632.672	625.543	590.678
788.691	780.186	771.7	770.548	762.042	751.858	744.665	737.213	735.039	727.699	719.904	717.434	714.67	706.853	704.262	697.898	690.456	680.088	682.847	680.41	678.033	669.935	662.918	660.26	653.388	646.072	644.494	642.108	633.137	626.005	591.115
789.274	780.762	772.271	771.117	762.605	752.412	745.216	737.76	735.583	728.239	720.439	717.964	715.196	707.375	704.779	698.413	690.966	680.59	683.353	680.913	678.532	670.428	663.408	660.746	653.871	646.551	644.97	642.58	633.603	626.466	591.552
789.856	781.339	772.842	771.686	763.169	752.967	745.767	738.307	736.126	728.778	720.974	718.495	715.722	707.896	705.296	698.928	691.477	681.092	683.86	681.415	679.03	670.921	663.898	661.231	654.353	647.029	645.446	643.052	634.068	626.928	591.989
790.438	781.915	773.412	772.255	763.732	753.521	746.317	738.853	736.669	729.317	721.508	719.025	716.248	708.417	705.813	699.442	691.988	681.594	684.366	681.917	679.528	671.414	664.388	661.717	654.835	647.508	645.922	643.524	634.533	627.39	592.426
791.021	782.492	773.983	772.824	764.295	754.076	746.868	739.4	737.212	729.857	722.043	719.556	716.774	708.939	706.33	699.957	692.498	682.095	684.872	682.42	680.027	671.908	664.877	662.202	655.318	647.986	646.398	643.996	634.999	627.852	592.863
791.603	783.068	774.554	773.392	764.858	754.63	747.419	739.947	737.755	730.396	722.577	720.086	717.3	709.46	706.847	700.472	693.009	682.597	685.378	682.922	680.525	672.401	665.367	662.687	655.8	648.465	646.874	644.468	635.464	628.313	593.3
792.185	783.645	775.124	773.961	765.421	755.184	747.97	740.493	738.298	730.935	723.112	720.617	717.825	709.981	707.364	700.986	693.52	683.099	685.885	683.424	681.023	672.894	665.857	663.173	656.282	648.943	647.349	644.939	635.929	628.775	593.737
792.767	784.221	775.695	774.53	765.983	755.739	748.52	741.04	738.841	731.474	723.646	721.147	718.351	710.502	707.881	701.501	694.03	683.6	686.391	683.926	681.521	673.387	666.347	663.658	656.764	649.422	647.825	645.411	636.394	629.237	594.174
793.349	784.798	776.266	775.099	766.546	756.293	749.071	741.587	739.384	732.013	724.181	721.678	718.877	711.023	708.397	702.015	694.541	684.102	686.897	684.428	682.02	673.88	666.836	664.143	657.247	649.9	648.301	645.883	636.859	629.698	594.611
793.932	785.374	776.836	775.667	767.109	756.847	749.622	742.133	739.927	732.552	724.715	722.208	719.403	711.544	708.914	702.53	695.051	684.603	687.403	684.931	682.518	674.373	667.326	664.629	657.729	650.378	648.777	646.355	637.325	630.16	595.048
794.514	785.95	777.407	776.236	767.672	757.401	750.172	742.68	740.47	733.091	725.25	722.738	719.929	712.065	709.431	703.044	695.562	685.105	687.909	685.433	683.016	674.866	667.816	665.114	658.211	650.857	649.252	646.826	637.79	630.621	595.484
795.096	786.526	777.977	776.804	768.235	757.956	750.723	743.226	741.013	733.63	725.784	723.269	720.454	712.587	709.948	703.559	696.072	685.607	688.415	685.935	683.514	675.359	668.305	665.599	658.693	651.335	649.728	647.298	638.255	631.083	595.921
795.678	787.103	778.548	777.373	768.797	758.51	751.273	743.773	741.556	734.169	726.319	723.799	720.98	713.108	710.464	704.073	696.582	686.108	688.922	686.437	684.012	675.852	668.795	666.084	659.175	651.813	650.203	647.77	638.72	631.544	596.358
796.26	787.679	779.118	777.942	769.36	759.064	751.824	744.319	742.099	734.708	726.853	724.329	721.506	713.628	710.981	704.588	697.093	686.609	689.428	686.939	684.51	676.345	669.284	666.569	659.657	652.291	650.679	648.241	639.185	632.006	596.795
796.842	788.255	779.688	778.51	769.923	759.618	752.374	744.865	742.641	735.247	727.387	724.859	722.031	714.149	711.498	705.102	697.603	687.111	689.934	687.441	685.008	676.838	669.774	667.055	660.139	652.769	651.155	648.713	639.65	632.467	597.231
797.424	788.831	780.259	779.078	770.485	760.172	752.925	745.412	743.184	735.786	727.921	725.389	722.557	714.67	712.014	705.617	698.113	687.612	690.44	687.943	685.506	677.331	670.264	667.54	660.621	653.248	651.63	649.184	640.115	632.929	597.668
798.005	789.407	780.829	779.647	771.048	760.726	753.475	745.958	743.727	736.325	728.456	725.92	723.082	715.191	712.531	706.131	698.624	688.114	690.946	688.444	686.004	677.823	670.753	668.025	661.103	653.726	652.106	649.656	640.58	633.39	598.105
798.587	789.983	781.399	780.215	771.611	761.28	754.025	746.504	744.27	736.864	728.99	726.45	723.608	715.712	713.047	706.645	699.134	688.615	691.451	688.946	686.502	678.316	671.242	668.51	661.585	654.204	652.581	650.127	641.045	633.852	598.541
799.169	790.559	781.97	780.784	772.173	761.834	754.576	747.051	744.812	737.402	729.524	726.98	724.133	716.233	713.564	707.159	699.644	689.116	691.957	689.448	687	678.809	671.732	668.995	662.067	654.682	653.057	650.599	641.51	634.313	598.978
799.751	791.135	782.54	781.352	772.736	762.388	755.126	747.597	745.355	737.941	730.058	727.51	724.659	716.754	714.08	707.674	700.154	689.618	692.463	689.95	687.498	679.302	672.221	669.48	662.549	655.16	653.532	651.07	641.974	634.774	599.415
800.333	791.711	783.11	781.92	773.298	762.942	755.676	748.143	745.897	738.48	730.592	728.04	725.184	717.274	714.597	708.188	700.664	690.119	692.969	690.452	687.996	679.794	672.711	669.965	663.031	655.638	654.007	651.542	642.439	635.235	599.851
800.914	792.287	783.68	782.488	773.861	763.496	756.227	748.689	746.44	739.019	731.126	728.57	725.71	717.795	715.113	708.702	701.175	690.62	693.475	690.954	688.494	680.287	673.2	670.45	663.512	656.116	654.483	652.013	642.904	635.697	600.288
801.496	792.863	784.25	783.057	774.423	764.049	756.777	749.235	746.983	739.557	731.66	729.1	726.235	718.316	715.63	709.216	701.685	691.121	693.981	691.455	688.991	680.78	673.689	670.934	663.994	656.594	654.958	652.485	643.369	636.158	600.724
802.078	793.439	784.82	783.625	774.985	764.603	757.327	749.782	747.525	740.096	732.194	729.63	726.76	718.836	716.146	709.73	702.195	691.622	694.486	691.957	689.489	681.272	674.179	671.419	664.476	657.072	655.433	652.956	643.834	636.619	601.161
802.659	794.014	785.39	784.193	775.548	765.157	757.877	750.328	748.067	740.634	732.728	730.159	727.286	719.357	716.662	710.244	702.705	692.124	694.992	692.459	689.987	681.765	674.668	671.904	664.958	657.55	655.909	653.427	644.298	637.08	601.597
803.241	794.59	785.96	784.761	776.11	765.711	758.427	750.874	748.61	741.173	733.262	730.689	727.811	719.878	717.179	710.758	703.215	692.625	695.498	692.96	690.485	682.257	675.157	672.389	665.439	658.027	656.384	653.899	644.763	637.542	602.034
803.822	795.166	786.53	785.329	776.672	766.264	758.977	751.42	749.152	741.712	733.796	731.219	728.336	720.398	717.695	711.272	703.725	693.126	696.003	693.462	690.982	682.75	675.646	672.874	665.921	658.505	656.859	654.37	645.228	638.003	602.47
804.404	795.742	787.1	785.897	777.234	766.818	759.527	751.966	749.695	742.25	734.33	731.749	728.861	720.919	718.211	711.786	704.235	693.627	696.509	693.963	691.48	683.243	676.135	673.359	666.403	658.983	657.334	654.841	645.692	638.464	602.907
804.985	796.317	787.67	786.465	777.797	767.372	760.077	752.512	750.237	742.789	734.864	732.279	729.386	721.439	718.728	712.3	704.745	694.128	697.015	694.465	691.978	683.735	676.625	673.843	666.884	659.461	657.809	655.312	646.157	638.925	603.343
805.567	796.893	788.24	787.033	778.359	767.925	760.627	753.057	750.779	743.327	735.398	732.808	729.912	721.96	719.244	712.814	705.254	694.629	697.52	694.967	692.475	684.227	677.114	674.328	667.366	659.939	658.285	655.784	646.622	639.386	603.779
806.148	797.468	788.81	787.601	778.921	768.479	761.177	753.603	751.322	743.865	735.931	733.338	730.437	722.48	719.76	713.328	705.764	695.13	698.026	695.468	692.973	684.72	677.603	674.813	667.848	660.416	658.76	656.255	647.086	639.847	604.216
806.729	798.044	789.38	788.169	779.483	769.032	761.727	754.149	751.864	744.404	736.465	733.868	730.962	723.001	720.276	713.842	706.274	695.631	698.531	695.97	693.47	685.212	678.092	675.297	668.329	660.894	659.235	656.726	647.551	640.308	604.652
807.311	798.62	789.949	788.737	780.045	769.586	762.277	754.695	752.406	744.942	736.999	734.397	731.487	723.521	720.792	714.356	706.784	696.132	699.037	696.471	693.968	685.705	678.581	675.782	668.811	661.372	659.71	657.197	648.015	640.769	605.088
807.892	799.195	790.519	789.304	780.607	770.139	762.827	755.241	752.948	745.48	737.532	734.927	732.012	724.041	721.308	714.87	707.294	696.633	699.542	696.972	694.465	686.197	679.07	676.267	669.292	661.85	660.185	657.668	648.48	641.23	605.524
808.473	799.77	791.089	789.872	781.169	770.693	763.376	755.786	753.49	746.019	738.066	735.457	732.537	724.562	721.824	715.384	707.803	697.133	700.048	697.474	694.963	686.689	679.559	676.751	669.774	662.327	660.66	658.139	648.944	641.691	605.961
809.054	800.346	791.658	790.44	781.731	771.246	763.926	756.332	754.032	746.557	738.6	735.986	733.062	725.082	722.34	715.897	708.313	697.634	700.553	697.975	695.46	687.182	680.048	677.236	670.255	662.805	661.135	658.61	649.409	642.152	606.397
809.635	800.921	792.228	791.008	782.293	771.799	764.476	756.878	754.575	747.095	739.133	736.516	733.587	725.602	722.856	716.411	708.823	698.135	701.058	698.477	695.957	687.674	680.537	677.72	670.736	663.282	661.61	659.081	649.873	642.613	606.833
810.217	801.497	792.798	791.575	782.855	772.353	765.026	757.423	755.117	747.633	739.667	737.045	734.112	726.123	723.372	716.925	709.332	698.636	701.564	698.978	696.455	688.166	681.026	678.205	671.218	663.76	662.085	659.552	650.338	643.074	607.269
810.798	802.072	793.367	792.143	783.417	772.906	765.575	757.969	755.659	748.171	740.2	737.574	734.637	726.643	723.888	717.438	709.842	699.137	702.069	699.479	696.952	688.658	681.514	678.689	671.699	664.237	662.56	660.023	650.802	643.535	607.705
811.379	802.647	793.937	792.711	783.978	773.459	766.125	758.515	756.201	748.71	740.734	738.104	735.161	727.163	724.404	717.952	710.352	699.637	702.574	699.98	697.449	689.151	682.003	679.174	672.181	664.715	663.035	660.494	651.266	643.995	608.142
811.96	803.222	794.506	793.278	784.54	774.013	766.674	759.06	756.743	749.248	741.267	738.633	735.686	727.683	724.92	718.466	710.861	700.138	703.079	700.482	697.947	689.643	682.492	679.658	672.662	665.192	663.51	660.965	651.731	644.456	608.578
812.541	803.798	795.076	793.846	785.102	774.566	767.224	759.606	757.285	749.786	741.801	739.163	736.211	728.203	725.436	718.979	711.371	700.639	703.585	700.983	698.444	690.135	682.981	680.142	673.143	665.67	663.984	661.436	652.195	644.917	609.014
813.122	804.373	795.645	794.413	785.664	775.119	767.774	760.151	757.826	750.324	742.334	739.692	736.736	728.723	725.952	719.493	711.88	701.139	704.09	701.484	698.941	690.627	683.47	680.627	673.624	666.147	664.459	661.907	652.659	645.378	609.45
813.703	804.948	796.214	794.981	786.225	775.672	768.323	760.697	758.368	750.862	742.868	740.221	737.26	729.243	726.467	720.006	712.39	701.64	704.595	701.985	699.438	691.119	683.958	681.111	674.106	666.625	664.934	662.378	653.124	645.838	609.886
814.284	805.523	796.784	795.548	786.787	776.225	768.873	761.242	758.91	751.4	743.401	740.751	737.785	729.764	726.983	720.52	712.899	702.14	705.1	702.486	699.936	691.611	684.447	681.595	674.587	667.102	665.409	662.848	653.588	646.299	610.322
814.864	806.098	797.353	796.116	787.349	776.778	769.422	761.788	759.452	751.938	743.934	741.28	738.31	730.284	727.499	721.033	713.409	702.641	705.605	702.987	700.433	692.103	684.936	682.08	675.068	667.579	665.884	663.319	654.052	646.76	610.758
815.445	806.673	797.922	796.683	787.91	777.331	769.971	762.333	759.994	752.476	744.468	741.809	738.834	730.804	728.015	721.547	713.918	703.141	706.11	703.488	700.93	692.595	685.424	682.564	675.549	668.057	666.358	663.79	654.516	647.22	611.194
816.026	807.248	798.492	797.25	788.472	777.884	770.521	762.878	760.535	753.013	745.001	742.338	739.359	731.323	728.53	722.06	714.428	703.642	706.616	703.989	701.427	693.087	685.913	683.048	676.03	668.534	666.833	664.261	654.98	647.681	611.63
816.607	807.823	799.061	797.818	789.033	778.437	771.07	763.424	761.077	753.551	745.534	742.867	739.884	731.843	729.046	722.574	714.937	704.142	707.121	704.49	701.924	693.579	686.402	683.532	676.512	669.011	667.308	664.731	655.445	648.142	612.066
817.188	808.398	799.63	798.385	789.595	778.99	771.62	763.969	761.619	754.089	746.067	743.396	740.408	732.363	729.561	723.087	715.446	704.643	707.626	704.991	702.421	694.071	686.89	684.017	676.993	669.489	667.782	665.202	655.909	648.602	612.502
817.768	808.973	800.199	798.952	790.156	779.543	772.169	764.514	762.161	754.627	746.6	743.926	740.933	732.883	730.077	723.6	715.955	705.143	708.131	705.492	702.918	694.563	687.379	684.501	677.474	669.966	668.257	665.673	656.373	649.063	612.937
818.349	809.548	800.768	799.519	790.718	780.096	772.718	765.059	762.702	755.165	747.134	744.455	741.457	733.403	730.593	724.114	716.465	705.644	708.635	705.993	703.415	695.055	687.867	684.985	677.955	670.443	668.731	666.143	656.837	649.523	613.373
818.929	810.123	801.337	800.087	791.279	780.649	773.267	765.604	763.244	755.702	747.667	744.984	741.982	733.923	731.108	724.627	716.974	706.144	709.14	706.494	703.912	695.547	688.356	685.469	678.436	670.92	669.206	666.614	657.301	649.984	613.809
819.51	810.698	801.906	800.654	791.841	781.202	773.817	766.15	763.785	756.24	748.2	745.513	742.506	734.443	731.624	725.14	717.483	706.644	709.645	706.995	704.409	696.038	688.844	685.953	678.917	671.397	669.681	667.085	657.765	650.444	614.245
820.091	811.272	802.476	801.221	792.402	781.754	774.366	766.695	764.327	756.778	748.733	746.042	743.031	734.962	732.139	725.653	717.992	707.145	710.15	707.496	704.906	696.53	689.333	686.437	679.398	671.874	670.155	667.555	658.229	650.905	614.681
820.671	811.847	803.045	801.788	792.963	782.307	774.915	767.24	764.868	757.315	749.266	746.571	743.555	735.482	732.655	726.166	718.502	707.645	710.655	707.997	705.403	697.022	689.821	686.921	679.879	672.352	670.63	668.026	658.693	651.365	615.117
821.252	812.422	803.613	802.355	793.525	782.86	775.464	767.785	765.41	757.853	749.799	747.099	744.079	736.002	733.17	726.68	719.011	708.145	711.16	708.497	705.9	697.514	690.31	687.405	680.36	672.829	671.104	668.496	659.157	651.826	615.552
821.832	812.997	804.182	802.922	794.086	783.413	776.013	768.33	765.951	758.391	750.332	747.628	744.604	736.521	733.685	727.193	719.52	708.646	711.665	708.998	706.397	698.005	690.798	687.889	680.84	673.306	671.578	668.967	659.621	652.286	615.988
822.413	813.571	804.751	803.489	794.647	783.965	776.562	768.875	766.493	758.928	750.865	748.157	745.128	737.041	734.201	727.706	720.029	709.146	712.169	709.499	706.893	698.497	691.286	688.373	681.321	673.783	672.053	669.437	660.085	652.746	616.424
822.993	814.146	805.32	804.056	795.208	784.518	777.111	769.42	767.034	759.466	751.398	748.686	745.652	737.561	734.716	728.219	720.538	709.646	712.674	710	707.39	698.989	691.775	688.857	681.802	674.26	672.527	669.908	660.548	653.207	616.859
823.573	814.72	805.889	804.623	795.769	785.071	777.66	769.965	767.575	760.003	751.931	749.215	746.176	738.08	735.231	728.732	721.047	710.146	713.179	710.5	707.887	699.48	692.263	689.341	682.283	674.737	673.002	670.378	661.012	653.667	617.295
824.154	815.295	806.458	805.19	796.331	785.623	778.209	770.51	768.117	760.541	752.463	749.744	746.701	738.6	735.747	729.245	721.556	710.646	713.684	711.001	708.384	699.972	692.751	689.825	682.764	675.214	673.476	670.848	661.476	654.127	617.731
824.734	815.869	807.027	805.757	796.892	786.176	778.758	771.055	768.658	761.078	752.996	750.272	747.225	739.119	736.262	729.758	722.065	711.146	714.188	711.502	708.88	700.464	693.24	690.309	683.244	675.691	673.95	671.319	661.94	654.588	618.166
825.314	816.444	807.595	806.324	797.453	786.728	779.307	771.6	769.199	761.616	753.529	750.801	747.749	739.639	736.777	730.271	722.574	711.646	714.693	712.002	709.377	700.955	693.728	690.793	683.725	676.168	674.425	671.789	662.404	655.048	618.602
825.894	817.018	808.164	806.891	798.014	787.281	779.856	772.144	769.741	762.153	754.062	751.33	748.273	740.158	737.292	730.784	723.083	712.146	715.197	712.503	709.874	701.447	694.216	691.276	684.206	676.644	674.899	672.259	662.867	655.508	619.038
826.475	817.593	808.733	807.457	798.575	787.833	780.405	772.689	770.282	762.69	754.595	751.859	748.797	740.678	737.808	731.297	723.592	712.646	715.702	713.003	710.37	701.938	694.704	691.76	684.687	677.121	675.373	672.73	663.331	655.968	619.473
827.055	818.167	809.301	808.024	799.136	788.386	780.953	773.234	770.823	763.228	755.127	752.387	749.321	741.197	738.323	731.81	724.101	713.146	716.207	713.504	710.867	702.43	695.192	692.244	685.167	677.598	675.847	673.2	663.795	656.429	619.909
827.635	818.742	809.87	808.591	799.697	788.938	781.502	773.779	771.364	763.765	755.66	752.916	749.845	741.717	738.838	732.323	724.609	713.646	716.711	714.004	711.364	702.921	695.68	692.728	685.648	678.075	676.322	673.67	664.259	656.889	620.344
828.215	819.316	810.439	809.158	800.258	789.49	782.051	774.323	771.905	764.302	756.193	753.444	750.369	742.236	739.353	732.836	725.118	714.146	717.216	714.505	711.86	703.413	696.169	693.211	686.129	678.552	676.796	674.141	664.722	657.349	620.78
828.795	819.89	811.007	809.724	800.819	790.043	782.6	774.868	772.446	764.839	756.725	753.973	750.893	742.755	739.868	733.348	725.627	714.646	717.72	715.005	712.357	703.904	696.657	693.695	686.609	679.029	677.27	674.611	665.186	657.809	621.215
829.375	820.465	811.576	810.291	801.379	790.595	783.148	775.413	772.988	765.377	757.258	754.501	751.417	743.275	740.383	733.861	726.136	715.146	718.225	715.506	712.853	704.395	697.145	694.179	687.09	679.505	677.744	675.081	665.65	658.269	621.651
829.955	821.039	812.144	810.857	801.94	791.147	783.697	775.957	773.529	765.914	757.791	755.03	751.941	743.794	740.898	734.374	726.645	715.646	718.729	716.006	713.35	704.887	697.633	694.662	687.57	679.982	678.218	675.551	666.113	658.729	622.086
830.535	821.613	812.713	811.424	802.501	791.7	784.246	776.502	774.07	766.451	758.323	755.558	752.465	744.313	741.413	734.887	727.153	716.146	719.233	716.507	713.846	705.378	698.121	695.146	688.051	680.459	678.692	676.021	666.577	659.189	622.521
831.115	822.187	813.281	811.991	803.062	792.252	784.794	777.047	774.611	766.988	758.856	756.087	752.989	744.833	741.928	735.399	727.662	716.646	719.738	717.007	714.343	705.869	698.609	695.63	688.531	680.935	679.166	676.491	667.04	659.649	622.957
831.695	822.761	813.85	812.557	803.623	792.804	785.343	777.591	775.152	767.525	759.388	756.615	753.513	745.352	742.443	735.912	728.171	717.146	720.242	717.507	714.839	706.361	699.097	696.113	689.012	681.412	679.64	676.962	667.504	660.109	623.392
832.275	823.335	814.418	813.124	804.183	793.356	785.892	778.136	775.692	768.062	759.921	757.144	754.037	745.871	742.958	736.425	728.679	717.645	720.747	718.008	715.335	706.852	699.585	696.597	689.492	681.889	680.114	677.432	667.967	660.569	623.828
832.855	823.91	814.986	813.69	804.744	793.908	786.44	778.68	776.233	768.599	760.453	757.672	754.561	746.39	743.473	736.937	729.188	718.145	721.251	718.508	715.832	707.343	700.073	697.08	689.973	682.365	680.588	677.902	668.431	661.029	624.263
833.435	824.484	815.555	814.256	805.305	794.461	786.989	779.225	776.774	769.136	760.985	758.2	755.084	746.909	743.988	737.45	729.696	718.645	721.755	719.008	716.328	707.834	700.56	697.564	690.453	682.842	681.062	678.372	668.894	661.489	624.698
834.015	825.058	816.123	814.823	805.865	795.013	787.537	779.769	777.315	769.673	761.518	758.729	755.608	747.429	744.503	737.963	730.205	719.145	722.259	719.508	716.824	708.326	701.048	698.047	690.933	683.318	681.536	678.842	669.358	661.949	625.134
834.594	825.632	816.691	815.389	806.426	795.565	788.086	780.314	777.856	770.21	762.05	759.257	756.132	747.948	745.017	738.475	730.714	719.644	722.764	720.009	717.321	708.817	701.536	698.531	691.414	683.795	682.01	679.312	669.821	662.409	625.569
835.174	826.206	817.26	815.956	806.986	796.117	788.634	780.858	778.397	770.747	762.583	759.785	756.656	748.467	745.532	738.988	731.222	720.144	723.268	720.509	717.817	709.308	702.024	699.014	691.894	684.271	682.484	679.782	670.285	662.869	626.004
835.754	826.78	817.828	816.522	807.547	796.669	789.182	781.402	778.938	771.284	763.115	760.314	757.179	748.986	746.047	739.5	731.731	720.644	723.772	721.009	718.313	709.799	702.512	699.498	692.375	684.748	682.958	680.252	670.748	663.329	626.439
836.333	827.354	818.396	817.088	808.108	797.221	789.731	781.947	779.478	771.821	763.647	760.842	757.703	749.505	746.562	740.013	732.239	721.143	724.276	721.509	718.809	710.29	703	699.981	692.855	685.224	683.432	680.722	671.211	663.789	626.875
836.913	827.927	818.964	817.654	808.668	797.773	790.279	782.491	780.019	772.358	764.179	761.37	758.227	750.024	747.076	740.525	732.747	721.643	724.78	722.009	719.306	710.781	703.487	700.464	693.335	685.701	683.906	681.191	671.675	664.248	627.31
837.493	828.501	819.532	818.221	809.228	798.325	790.827	783.035	780.56	772.895	764.712	761.898	758.75	750.543	747.591	741.038	733.256	722.142	725.284	722.509	719.802	711.272	703.975	700.948	693.815	686.177	684.38	681.661	672.138	664.708	627.745
838.072	829.075	820.1	818.787	809.789	798.876	791.376	783.579	781.1	773.432	765.244	762.426	759.274	751.062	748.106	741.55	733.764	722.642	725.789	723.009	720.298	711.763	704.463	701.431	694.296	686.654	684.853	682.131	672.601	665.168	628.18
838.652	829.649	820.668	819.353	810.349	799.428	791.924	784.124	781.641	773.969	765.776	762.954	759.797	751.581	748.62	742.063	734.273	723.141	726.293	723.51	720.794	712.254	704.95	701.914	694.776	687.13	685.327	682.601	673.065	665.628	628.615
839.231	830.223	821.236	819.919	810.91	799.98	792.472	784.668	782.182	774.505	766.308	763.483	760.321	752.099	749.135	742.575	734.781	723.641	726.797	724.01	721.29	712.745	705.438	702.398	695.256	687.606	685.801	683.071	673.528	666.087	629.05

## Sheet:  25K Shift
13.046	18.082	13.739	17.994	10.436	14.219	17.684	10.179	13.831	17.042	10.015	12.817	16.163	9.198	12.251	15.385	18.565	11.556	14.425	18.43	12.441	9.711	15.515	18.688	10.922	13.976	16.674	8.722	11.72	17.093	12.153
13.72	18.748	14.396	18.644	11.083	14.861	18.32	10.811	14.457	17.663	10.631	13.429	16.77	9.8	12.848	15.977	19.152	12.139	15.004	19.003	13.008	10.281	16.076	19.244	11.474	14.524	17.218	9.263	12.256	17.62	12.673
14.394	19.414	15.054	19.295	11.73	15.502	18.956	11.442	15.084	18.284	11.248	14.041	17.376	10.402	13.446	16.57	19.74	12.722	15.582	19.575	13.574	10.852	16.638	19.801	12.027	15.072	17.762	9.804	12.792	18.148	13.193
15.068	20.08	15.711	19.946	12.377	16.142	19.591	12.074	15.709	18.905	11.864	14.653	17.983	11.004	14.043	17.162	20.327	13.305	16.161	20.147	14.139	11.422	17.199	20.357	12.58	15.62	18.306	10.344	13.328	18.676	13.713
15.741	20.746	16.368	20.596	13.024	16.783	20.227	12.706	16.335	19.526	12.481	15.265	18.59	11.607	14.64	17.754	20.915	13.888	16.739	20.719	14.705	11.992	17.76	20.913	13.133	16.168	18.85	10.885	13.864	19.204	14.232
16.415	21.412	17.025	21.247	13.67	17.424	20.862	13.337	16.961	20.147	13.097	15.877	19.197	12.209	15.238	18.347	21.502	14.47	17.317	21.291	15.271	12.562	18.321	21.469	13.686	16.716	19.393	11.426	14.4	19.731	14.752
17.089	22.078	17.682	21.897	14.317	18.065	21.498	13.969	17.587	20.768	13.713	16.489	19.803	12.81	15.835	18.939	22.09	15.053	17.896	21.863	15.837	13.132	18.882	22.025	14.238	17.264	19.937	11.966	14.936	20.259	15.272
17.763	22.744	18.339	22.548	14.964	18.706	22.133	14.6	18.213	21.389	14.329	17.1	20.41	13.412	16.432	19.532	22.677	15.636	18.474	22.436	16.403	13.702	19.443	22.582	14.791	17.812	20.481	12.507	15.472	20.786	15.792
18.437	23.41	18.996	23.198	15.61	19.347	22.768	15.232	18.839	22.009	14.945	17.712	21.017	14.014	17.029	20.124	23.265	16.219	19.052	23.008	16.969	14.272	20.004	23.138	15.344	18.36	21.025	13.047	16.008	21.314	16.311
19.11	24.076	19.653	23.849	16.257	19.987	23.404	15.863	19.465	22.63	15.562	18.324	21.623	14.616	17.626	20.716	23.852	16.801	19.63	23.58	17.535	14.842	20.565	23.694	15.896	18.908	21.568	13.588	16.544	21.841	16.831
19.784	24.742	20.31	24.499	16.904	20.628	24.039	16.495	20.09	23.251	16.178	18.936	22.23	15.218	18.223	21.308	24.439	17.384	20.208	24.151	18.1	15.412	21.126	24.25	16.449	19.456	22.112	14.128	17.08	22.369	17.351
20.457	25.407	20.967	25.149	17.55	21.269	24.674	17.126	20.716	23.872	16.794	19.547	22.836	15.82	18.82	21.9	25.026	17.966	20.787	24.723	18.666	15.982	21.687	24.806	17.001	20.004	22.656	14.669	17.615	22.896	17.87
21.131	26.073	21.624	25.8	18.196	21.909	25.309	17.757	21.342	24.492	17.41	20.159	23.443	16.421	19.417	22.493	25.613	18.549	21.365	25.295	19.232	16.552	22.248	25.362	17.554	20.551	23.199	15.209	18.151	23.424	18.39
21.804	26.739	22.281	26.45	18.843	22.55	25.944	18.389	21.967	25.113	18.026	20.771	24.049	17.023	20.014	23.085	26.201	19.131	21.943	25.867	19.797	17.122	22.809	25.918	18.106	21.099	23.743	15.749	18.687	23.951	18.909
22.478	27.404	22.938	27.1	19.489	23.19	26.58	19.02	22.593	25.733	18.642	21.382	24.656	17.625	20.611	23.677	26.788	19.714	22.521	26.439	20.363	17.692	23.369	26.473	18.659	21.647	24.286	16.29	19.222	24.478	19.429
23.151	28.07	23.595	27.75	20.136	23.83	27.215	19.651	23.218	26.354	19.257	21.994	25.262	18.226	21.208	24.269	27.375	20.296	23.099	27.011	20.928	18.261	23.93	27.029	19.211	22.194	24.83	16.83	19.758	25.006	19.948
23.824	28.735	24.251	28.4	20.782	24.471	27.85	20.282	23.844	26.974	19.873	22.605	25.868	18.828	21.805	24.861	27.962	20.879	23.677	27.582	21.494	18.831	24.491	27.585	19.763	22.742	25.373	17.37	20.294	25.533	20.468
24.498	29.401	24.908	29.05	21.428	25.111	28.485	20.913	24.469	27.595	20.489	23.217	26.474	19.43	22.402	25.453	28.549	21.461	24.255	28.154	22.059	19.401	25.052	28.141	20.316	23.29	25.916	17.91	20.829	26.06	20.987
25.171	30.066	25.564	29.7	22.074	25.751	29.119	21.544	25.094	28.215	21.105	23.828	27.081	20.031	22.998	26.044	29.136	22.043	24.832	28.726	22.625	19.97	25.612	28.697	20.868	23.837	26.46	18.451	21.365	26.587	21.506
25.844	30.731	26.221	30.35	22.72	26.392	29.754	22.175	25.72	28.835	21.721	24.439	27.687	20.632	23.595	26.636	29.723	22.626	25.41	29.297	23.19	20.54	26.173	29.252	21.42	24.385	27.003	18.991	21.9	27.115	22.026
28.536	31.397	26.877	31	23.366	27.032	30.389	22.806	26.345	29.456	22.336	25.051	28.293	21.234	24.192	27.228	30.31	23.208	25.988	29.869	23.755	21.11	26.733	29.808	21.972	24.932	27.546	19.531	22.436	27.642	22.545
28.536	32.062	27.534	31.65	24.012	27.672	31.024	23.437	26.97	30.076	22.952	25.662	28.899	21.835	24.788	27.82	30.896	23.79	26.566	30.44	24.321	21.679	27.294	30.364	22.524	25.479	28.09	20.071	22.971	28.169	23.064
28.536	32.727	28.19	32.299	24.658	28.312	31.659	24.068	27.595	30.696	23.567	26.273	29.505	22.437	25.385	28.412	31.483	24.372	27.143	31.012	24.886	22.249	27.855	30.919	23.076	26.027	28.633	20.611	23.507	28.696	23.584
29.209	33.392	28.847	32.949	25.304	28.952	32.293	24.699	28.22	31.316	24.183	26.884	30.111	23.038	25.982	29.003	32.07	24.954	27.721	31.583	25.451	22.818	28.415	31.475	23.629	26.574	29.176	21.151	24.042	29.223	24.103
28.536	34.057	29.503	33.599	25.95	29.592	32.928	25.329	28.846	31.936	24.798	27.496	30.717	23.639	26.578	29.595	32.657	25.536	28.299	32.155	26.016	23.388	28.975	32.03	24.181	27.121	29.719	21.691	24.577	29.75	24.622
29.882	34.722	30.159	34.249	26.596	30.232	33.563	25.96	29.471	32.556	25.414	28.107	31.323	24.24	27.175	30.186	33.243	26.118	28.876	32.726	26.581	23.957	29.536	32.586	24.733	27.669	30.262	22.231	25.113	30.277	25.141
30.555	35.387	30.815	34.898	27.242	30.872	34.197	26.591	30.096	33.176	26.029	28.718	31.929	24.841	27.771	30.778	33.83	26.7	29.454	33.297	27.147	24.526	30.096	33.141	25.285	28.216	30.805	22.771	25.648	30.804	25.66
31.228	36.052	31.472	35.548	27.888	31.512	34.832	27.221	30.721	33.796	26.645	29.329	32.534	25.443	28.367	31.37	34.416	27.282	30.031	33.869	27.712	25.096	30.656	33.697	25.837	28.763	31.348	23.311	26.183	31.331	26.179
31.9	36.717	32.128	36.197	28.533	32.152	35.466	27.852	31.345	34.416	27.26	29.94	33.14	26.044	28.964	31.961	35.003	27.864	30.609	34.44	28.277	25.665	31.217	34.252	26.388	29.31	31.891	23.85	26.718	31.858	26.698
32.573	37.382	32.784	36.847	29.179	32.792	36.1	28.483	31.97	35.036	27.875	30.551	33.746	26.645	29.56	32.552	35.59	28.446	31.186	35.011	28.842	26.234	31.777	34.807	26.94	29.857	32.434	24.39	27.253	32.384	27.217
33.246	38.047	33.44	37.496	29.825	33.431	36.735	29.113	32.595	35.656	28.49	31.162	34.352	27.246	30.156	33.144	36.176	29.028	31.764	35.582	29.407	26.803	32.337	35.362	27.492	30.405	32.977	24.93	27.788	32.911	27.736
33.918	38.712	34.096	38.145	30.47	34.071	37.369	29.744	33.22	36.276	29.106	31.772	34.957	27.847	30.752	33.735	36.762	29.61	32.341	36.153	29.972	27.372	32.897	35.918	28.044	30.952	33.52	25.47	28.323	33.438	28.255
34.591	39.376	34.752	38.795	31.116	34.711	38.003	30.374	33.845	36.896	29.721	32.383	35.563	28.447	31.349	34.327	37.349	30.191	32.918	36.724	30.536	27.942	33.457	36.473	28.596	31.499	34.063	26.009	28.858	33.965	28.774
35.263	40.041	35.408	39.444	31.761	35.35	38.638	31.004	34.469	37.515	30.336	32.994	36.169	29.048	31.945	34.918	37.935	30.773	33.495	37.296	31.101	28.511	34.018	37.028	29.147	32.046	34.606	26.549	29.393	34.491	29.293
35.936	40.706	36.063	40.093	32.407	35.99	39.272	31.635	35.094	38.135	30.951	33.605	36.774	29.649	32.541	35.509	38.521	31.355	34.073	37.867	31.666	29.08	34.578	37.583	29.699	32.593	35.148	27.089	29.928	35.018	29.812
36.608	41.37	36.719	40.742	33.052	36.63	39.906	32.265	35.719	38.755	31.566	34.215	37.38	30.25	33.137	36.1	39.108	31.936	34.65	38.438	32.231	29.649	35.138	38.138	30.251	33.139	35.691	27.628	30.463	35.545	30.33
37.281	42.035	37.375	41.392	33.697	37.269	40.54	32.895	36.343	39.374	32.181	34.826	37.985	30.851	33.733	36.691	39.694	32.518	35.227	39.008	32.796	30.218	35.698	38.693	30.802	33.686	36.234	28.168	30.998	36.071	30.849
37.953	42.699	38.031	42.041	34.343	37.908	41.174	33.525	36.968	39.994	32.796	35.437	38.59	31.451	34.329	37.282	40.28	33.1	35.804	39.579	33.36	30.786	36.257	39.248	31.354	34.233	36.776	28.707	31.533	36.598	31.368
38.625	43.364	38.686	42.69	34.988	38.548	41.808	34.155	37.592	40.613	33.411	36.047	39.196	32.052	34.925	37.874	40.866	33.681	36.381	40.15	33.925	31.355	36.817	39.803	31.905	34.78	37.319	29.247	32.068	37.124	31.887
39.297	44.028	39.342	43.339	35.633	39.187	42.442	34.785	38.217	41.233	34.026	36.658	39.801	32.653	35.521	38.465	41.452	34.262	36.958	40.721	34.49	31.924	37.377	40.358	32.457	35.327	37.862	29.786	32.603	37.651	32.405
39.969	44.692	39.997	43.988	36.278	39.826	43.076	35.416	38.841	41.852	34.64	37.268	40.406	33.253	36.117	39.056	42.038	34.844	37.535	41.292	35.054	32.493	37.937	40.913	33.008	35.873	38.404	30.325	33.137	38.177	32.924
40.641	45.357	40.653	44.637	36.923	40.466	43.71	36.046	39.465	42.471	35.255	37.878	41.012	33.854	36.712	39.646	42.624	35.425	38.112	41.863	35.619	33.062	38.497	41.468	33.56	36.42	38.947	30.865	33.672	38.704	33.442
41.314	46.021	41.308	45.285	37.568	41.105	44.344	36.675	40.09	43.091	35.87	38.489	41.617	34.454	37.308	40.237	43.21	36.007	38.689	42.433	36.183	33.63	39.057	42.023	34.111	36.967	39.489	31.404	34.207	39.23	33.961
41.986	46.685	41.964	45.934	38.214	41.744	44.977	37.305	40.714	43.71	36.485	39.099	42.222	35.055	37.904	40.828	43.796	36.588	39.266	43.004	36.748	34.199	39.616	42.578	34.662	37.513	40.032	31.943	34.741	39.756	34.48
42.657	47.349	42.619	46.583	38.858	42.383	45.611	37.935	41.338	44.329	37.099	39.709	42.827	35.655	38.499	41.419	44.382	37.169	39.843	43.575	37.312	34.768	40.176	43.132	35.214	38.06	40.574	32.483	35.276	40.282	34.998
43.329	48.013	43.274	47.232	39.503	43.022	46.245	38.565	41.962	44.948	37.714	40.32	43.432	36.255	39.095	42.01	44.968	37.75	40.419	44.145	37.876	35.336	40.735	43.687	35.765	38.607	41.116	33.022	35.811	40.809	35.516
44.001	48.677	43.93	47.88	40.148	43.661	46.878	39.195	42.586	45.568	38.328	40.93	44.037	36.856	39.691	42.601	45.554	38.332	40.996	44.716	38.441	35.905	41.295	44.242	36.316	39.153	41.659	33.561	36.345	41.335	36.035
44.673	49.341	44.585	48.529	40.793	44.3	47.512	39.825	43.21	46.187	38.943	41.54	44.642	37.456	40.286	43.191	46.14	38.913	41.573	45.286	39.005	36.473	41.855	44.796	36.867	39.699	42.201	34.1	36.88	41.861	36.553
45.345	50.005	45.24	49.177	41.438	44.939	48.146	40.454	43.834	46.806	39.557	42.15	45.247	38.056	40.882	43.782	46.725	39.494	42.15	45.857	39.569	37.042	42.414	45.351	37.418	40.246	42.743	34.639	37.414	42.387	37.072
46.016	50.669	45.895	49.826	42.083	45.578	48.779	41.084	44.458	47.425	40.172	42.76	45.852	38.656	41.477	44.372	47.311	40.075	42.726	46.427	40.133	37.61	42.974	45.906	37.97	40.792	43.285	35.178	37.948	42.913	37.59
46.688	51.333	46.55	50.474	42.727	46.217	49.413	41.713	45.082	48.044	40.786	43.37	46.457	39.256	42.073	44.963	47.897	40.656	43.303	46.997	40.698	38.179	43.533	46.46	38.521	41.339	43.828	35.717	38.483	43.439	38.108
47.36	51.997	47.205	51.123	43.372	46.855	50.046	42.343	45.706	48.663	41.4	43.98	47.061	39.857	42.668	45.554	48.482	41.237	43.879	47.568	41.262	38.747	44.092	47.015	39.072	41.885	44.37	36.256	39.017	43.966	38.626
48.031	52.66	47.86	51.771	44.016	47.494	50.679	42.972	46.33	49.281	42.014	44.59	47.666	40.457	43.263	46.144	49.068	41.818	44.456	48.138	41.826	39.315	44.652	47.569	39.623	42.431	44.912	36.795	39.552	44.492	39.144
48.703	53.324	48.515	52.42	44.661	48.133	51.313	43.602	46.954	49.9	42.629	45.2	48.271	41.057	43.858	46.734	49.653	42.399	45.032	48.708	42.39	39.884	45.211	48.123	40.174	42.977	45.454	37.334	40.086	45.017	39.663
49.374	53.988	49.17	53.068	45.305	48.771	51.946	44.231	47.578	50.519	43.243	45.81	48.875	41.657	44.454	47.325	50.239	42.979	45.609	49.279	42.954	40.452	45.77	48.678	40.725	43.524	45.996	37.873	40.62	45.543	40.181
50.045	54.651	49.825	53.716	45.95	49.41	52.579	44.861	48.201	51.138	43.857	46.42	49.48	42.256	45.049	47.915	50.824	43.56	46.185	49.849	43.518	41.02	46.33	49.232	41.275	44.07	46.538	38.412	41.154	46.069	40.699
50.717	55.315	50.479	54.364	46.594	50.049	53.212	45.49	48.825	51.756	44.471	47.029	50.085	42.856	45.644	48.506	51.41	44.141	46.761	50.419	44.082	41.588	46.889	49.786	41.826	44.616	47.08	38.95	41.688	46.595	41.217
51.388	55.978	51.134	55.012	47.239	50.687	53.845	46.119	49.448	52.375	45.085	47.639	50.689	43.456	46.239	49.096	51.995	44.722	47.338	50.989	44.646	42.156	47.448	50.341	42.377	45.162	47.622	39.489	42.222	47.121	41.735
52.059	56.642	51.789	55.66	47.883	51.325	54.478	46.748	50.072	52.994	45.699	48.249	51.294	44.056	46.834	49.686	52.58	45.302	47.914	51.559	45.21	42.724	48.007	50.895	42.928	45.708	48.164	40.028	42.757	47.647	42.253
52.73	57.305	52.443	56.308	48.527	51.964	55.111	47.378	50.696	53.612	46.313	48.858	51.898	44.656	47.429	50.276	53.165	45.883	48.49	52.129	45.773	43.293	48.566	51.449	43.478	46.254	48.705	40.567	43.291	48.173	42.771
53.402	57.968	53.098	56.956	49.171	52.602	55.744	48.007	51.319	54.231	46.927	49.468	52.502	45.255	48.024	50.866	53.751	46.464	49.066	52.699	46.337	43.86	49.125	52.003	44.029	46.8	49.247	41.105	43.825	48.698	43.289
54.073	58.632	53.753	57.604	49.815	53.24	56.377	48.636	51.942	54.849	47.541	50.077	53.107	45.855	48.619	51.456	54.336	47.044	49.642	53.269	46.901	44.428	49.684	52.557	44.58	47.346	49.789	41.644	44.359	49.224	43.807
54.744	59.295	54.407	58.252	50.46	53.879	57.01	49.265	52.566	55.468	48.155	50.687	53.711	46.455	49.214	52.046	54.921	47.625	50.218	53.839	47.465	44.996	50.243	53.111	45.13	47.892	50.331	42.182	44.892	49.75	44.324
55.415	59.958	55.061	58.9	51.104	54.517	57.643	49.894	53.189	56.086	48.768	51.296	54.315	47.054	49.809	52.636	55.506	48.205	50.794	54.409	48.028	45.564	50.802	53.665	45.681	48.438	50.872	42.721	45.426	50.275	44.842
56.085	60.621	55.716	59.548	51.748	55.155	58.276	50.523	53.812	56.704	49.382	51.906	54.92	47.654	50.404	53.226	56.091	48.786	51.37	54.978	48.592	46.132	51.361	54.219	46.231	48.983	51.414	43.259	45.96	50.801	45.36
56.756	61.284	56.37	60.195	52.392	55.793	58.909	51.152	54.436	57.322	49.996	52.515	55.524	48.253	50.998	53.816	56.676	49.366	51.946	55.548	49.155	46.7	51.92	54.773	46.782	49.529	51.956	43.798	46.494	51.326	45.878
57.427	61.947	57.024	60.843	53.035	56.431	59.541	51.78	55.059	57.941	50.609	53.124	56.128	48.853	51.593	54.406	57.261	49.946	52.522	56.118	49.719	47.268	52.478	55.327	47.332	50.075	52.497	44.336	47.028	51.852	46.395
58.098	62.61	57.679	61.491	53.679	57.069	60.174	52.409	55.682	58.559	51.223	53.733	56.732	49.452	52.188	54.996	57.846	50.527	53.098	56.688	50.282	47.835	53.037	55.881	47.883	50.621	53.039	44.874	47.562	52.377	46.913
58.769	63.273	58.333	62.138	54.323	57.707	60.806	53.038	56.305	59.177	51.836	54.343	57.336	50.051	52.782	55.586	58.431	51.107	53.674	57.257	50.846	48.403	53.596	56.435	48.433	51.166	53.58	45.413	48.095	52.903	47.431
59.439	63.936	58.987	62.786	54.967	58.345	61.439	53.667	56.928	59.795	52.45	54.952	57.94	50.651	53.377	56.175	59.016	51.687	54.25	57.827	51.409	48.971	54.154	56.988	48.983	51.712	54.122	45.951	48.629	53.428	47.948
60.11	64.599	59.641	63.433	55.611	58.983	62.072	54.295	57.551	60.413	53.063	55.561	58.544	51.25	53.972	56.765	59.6	52.267	54.825	58.396	51.973	49.538	54.713	57.542	49.534	52.257	54.663	46.489	49.162	53.953	48.466
60.78	65.261	60.295	64.081	56.254	59.621	62.704	54.924	58.174	61.031	53.677	56.17	59.148	51.849	54.566	57.355	60.185	52.847	55.401	58.966	52.536	50.106	55.272	58.096	50.084	52.803	55.204	47.028	49.696	54.479	48.983
61.451	65.924	60.949	64.728	56.898	60.258	63.336	55.552	58.797	61.649	54.29	56.779	59.752	52.448	55.16	57.944	60.77	53.427	55.977	59.535	53.099	50.673	55.83	58.649	50.634	53.348	55.746	47.566	50.23	55.004	49.501
62.121	66.587	61.603	65.375	57.541	60.896	63.969	56.181	59.42	62.267	54.903	57.388	60.355	53.047	55.755	58.534	61.355	54.007	56.552	60.105	53.662	51.241	56.389	59.203	51.184	53.894	56.287	48.104	50.763	55.529	50.018
62.792	67.249	62.257	66.023	58.185	61.534	64.601	56.809	60.043	62.885	55.517	57.997	60.959	53.646	56.349	59.124	61.939	54.587	57.128	60.674	54.226	51.808	56.947	59.757	51.734	54.439	56.828	48.642	51.297	56.054	50.535
63.462	67.912	62.91	66.67	58.828	62.171	65.233	57.438	60.665	63.503	56.13	58.606	61.563	54.245	56.944	59.713	62.524	55.167	57.703	61.243	54.789	52.375	57.506	60.31	52.284	54.985	57.369	49.18	51.83	56.579	51.053
64.132	68.574	63.564	67.317	59.472	62.809	65.865	58.066	61.288	64.12	56.743	59.215	62.167	54.844	57.538	60.302	63.108	55.747	58.279	61.813	55.352	52.943	58.064	60.864	52.835	55.53	57.911	49.718	52.363	57.104	51.57
64.803	69.237	64.218	67.964	60.115	63.446	66.498	58.694	61.911	64.738	57.356	59.823	62.77	55.443	58.132	60.892	63.693	56.327	58.854	62.382	55.915	53.51	58.622	61.417	53.384	56.075	58.452	50.256	52.897	57.63	52.087
65.473	69.899	64.871	68.611	60.758	64.084	67.13	59.323	62.533	65.356	57.969	60.432	63.374	56.042	58.726	61.481	64.277	56.907	59.43	62.951	56.478	54.077	59.18	61.97	53.934	56.62	58.993	50.794	53.43	58.155	52.605
66.143	70.562	65.525	69.258	61.402	64.721	67.762	59.951	63.156	65.973	58.582	61.041	63.977	56.641	59.32	62.07	64.862	57.487	60.005	63.52	57.041	54.644	59.739	62.524	54.484	57.166	59.534	51.332	53.963	58.68	53.122
66.813	71.224	66.179	69.905	62.045	65.359	68.394	60.579	63.778	66.591	59.195	61.649	64.581	57.24	59.914	62.66	65.446	58.066	60.58	64.09	57.604	55.212	60.297	63.077	55.034	57.711	60.075	51.87	54.497	59.205	53.639
67.483	71.886	66.832	70.552	62.688	65.996	69.026	61.207	64.401	67.208	59.808	62.258	65.184	57.839	60.508	63.249	66.03	58.646	61.156	64.659	58.167	55.779	60.855	63.63	55.584	58.256	60.616	52.407	55.03	59.729	54.156
68.153	72.548	67.485	71.199	63.331	66.633	69.658	61.835	65.023	67.826	60.421	62.867	65.788	58.437	61.102	63.838	66.614	59.226	61.731	65.228	58.73	56.346	61.413	64.184	56.134	58.801	61.157	52.945	55.563	60.254	54.673
68.823	73.21	68.139	71.846	63.974	67.27	70.289	62.463	65.646	68.443	61.034	63.475	66.391	59.036	61.696	64.427	67.199	59.805	62.306	65.797	59.293	56.913	61.971	64.737	56.684	59.346	61.698	53.483	56.096	60.779	55.19
69.493	73.872	68.792	72.493	64.617	67.908	70.921	63.091	66.268	69.06	61.646	64.084	66.994	59.635	62.29	65.016	67.783	60.385	62.881	66.366	59.855	57.48	62.529	65.29	57.233	59.891	62.238	54.021	56.629	61.304	55.707
70.162	74.534	69.445	73.139	65.26	68.545	71.553	63.719	66.89	69.678	62.259	64.692	67.597	60.233	62.884	65.605	68.367	60.964	63.456	66.934	60.418	58.047	63.087	65.843	57.783	60.436	62.779	54.558	57.162	61.829	56.224
70.832	75.196	70.099	73.786	65.903	69.182	72.185	64.347	67.512	70.295	62.872	65.3	68.201	60.832	63.478	66.194	68.951	61.544	64.031	67.503	60.981	58.614	63.645	66.396	58.333	60.981	63.32	55.096	57.695	62.353	56.741
71.502	75.858	70.752	74.433	66.546	69.819	72.816	64.975	68.135	70.912	63.485	65.909	68.804	61.43	64.072	66.783	69.535	62.123	64.606	68.072	61.543	59.18	64.203	66.949	58.882	61.526	63.861	55.633	58.228	62.878	57.258
72.171	76.52	71.405	75.079	67.189	70.456	73.448	65.602	68.757	71.529	64.097	66.517	69.407	62.029	64.665	67.372	70.119	62.703	65.181	68.641	62.106	59.747	64.761	67.502	59.432	62.071	64.401	56.171	58.761	63.403	57.775
72.841	77.182	72.058	75.726	67.831	71.093	74.08	66.23	69.379	72.147	64.71	67.125	70.01	62.627	65.259	67.961	70.703	63.282	65.756	69.21	62.669	60.314	65.319	68.055	59.981	62.615	64.942	56.708	59.294	63.927	58.292
73.511	77.844	72.711	76.372	68.474	71.729	74.711	66.858	70.001	72.764	65.322	67.733	70.613	63.225	65.853	68.55	71.287	63.861	66.331	69.778	63.231	60.881	65.877	68.608	60.531	63.16	65.483	57.246	59.827	64.452	58.809
74.18	78.505	73.364	77.019	69.117	72.366	75.342	67.485	70.623	73.381	65.935	68.341	71.216	63.824	66.446	69.138	71.871	64.441	66.906	70.347	63.794	61.447	66.434	69.161	61.08	63.705	66.023	57.783	60.359	64.977	59.325
74.849	79.167	74.017	77.665	69.759	73.003	75.974	68.113	71.245	73.998	66.547	68.949	71.819	64.422	67.04	69.727	72.454	65.02	67.481	70.916	64.356	62.014	66.992	69.714	61.629	64.25	66.564	58.321	60.892	65.501	59.842
75.519	79.829	74.67	78.311	70.402	73.64	76.605	68.74	71.867	74.615	67.159	69.557	72.422	65.02	67.633	70.316	73.038	65.599	68.055	71.484	64.918	62.581	67.55	70.266	62.179	64.794	67.104	58.858	61.425	66.025	60.359
76.188	80.49	75.323	78.957	71.044	74.276	77.237	69.368	72.488	75.231	67.772	70.165	73.024	65.618	68.227	70.904	73.622	66.178	68.63	72.053	65.481	63.147	68.107	70.819	62.728	65.339	67.645	59.395	61.958	66.55	60.875
76.857	81.152	75.975	79.604	71.687	74.913	77.868	69.995	73.11	75.848	68.384	70.773	73.627	66.216	68.82	71.493	74.206	66.757	69.205	72.621	66.043	63.714	68.665	71.372	63.277	65.883	68.185	59.933	62.49	67.074	61.392
77.527	81.813	76.628	80.25	72.329	75.549	78.499	70.623	73.732	76.465	68.996	71.381	74.23	66.814	69.413	72.081	74.789	67.336	69.779	73.19	66.605	64.28	69.223	71.924	63.827	66.428	68.725	60.47	63.023	67.599	61.908
78.196	82.475	77.281	80.896	72.971	76.186	79.13	71.25	74.354	77.082	69.608	71.989	74.833	67.412	70.007	72.67	75.373	67.915	70.354	73.758	67.167	64.847	69.78	72.477	64.376	66.972	69.266	61.007	63.555	68.123	62.425
78.865	83.136	77.933	81.542	73.614	76.822	79.761	71.877	74.975	77.698	70.22	72.597	75.435	68.01	70.6	73.258	75.956	68.494	70.928	74.326	67.73	65.413	70.337	73.03	64.925	67.517	69.806	61.544	64.088	68.647	62.941
79.534	83.797	78.586	82.188	74.256	77.459	80.392	72.504	75.597	78.315	70.832	73.205	76.038	68.608	71.193	73.847	76.54	69.073	71.503	74.895	68.292	65.979	70.895	73.582	65.474	68.061	70.346	62.081	64.62	69.171	63.458
80.203	84.458	79.238	82.834	74.898	78.095	81.023	73.131	76.218	78.932	71.444	73.812	76.64	69.206	71.786	74.435	77.123	69.652	72.077	75.463	68.854	66.546	71.452	74.135	66.023	68.605	70.887	62.618	65.153	69.696	63.974
80.872	85.12	79.891	83.48	75.54	78.731	81.654	73.759	76.84	79.548	72.056	74.42	77.243	69.804	72.38	75.023	77.707	70.231	72.652	76.031	69.416	67.112	72.01	74.687	66.572	69.15	71.427	63.155	65.685	70.22	64.491
81.541	85.781	80.543	84.126	76.182	79.368	82.285	74.386	77.461	80.165	72.668	75.028	77.845	70.402	72.973	75.612	78.29	70.809	73.226	76.599	69.978	67.678	72.567	75.239	67.121	69.694	71.967	63.692	66.218	70.744	65.007
82.209	86.442	81.196	84.771	76.824	80.004	82.916	75.013	78.083	80.781	73.28	75.635	78.448	70.999	73.566	76.2	78.873	71.388	73.8	77.167	70.54	68.244	73.124	75.792	67.67	70.238	72.507	64.229	66.75	71.268	65.523
82.878	87.103	81.848	85.417	77.466	80.64	83.547	75.64	78.704	81.398	73.892	76.243	79.05	71.597	74.159	76.788	79.457	71.967	74.374	77.736	71.102	68.81	73.681	76.344	68.219	70.782	73.047	64.766	67.282	71.792	66.039
83.547	87.764	82.5	86.063	78.108	81.276	84.178	76.267	79.325	82.014	74.504	76.85	79.652	72.195	74.752	77.376	80.04	72.545	74.949	78.304	71.664	69.376	74.238	76.896	68.768	71.327	73.587	65.303	67.814	72.316	66.556
84.216	88.424	83.152	86.708	78.75	81.912	84.808	76.893	79.946	82.63	75.115	77.457	80.255	72.792	75.344	77.964	80.623	73.124	75.523	78.872	72.225	69.942	74.795	77.449	69.316	71.871	74.127	65.84	68.347	72.84	67.072
84.884	89.085	83.804	87.354	79.392	82.548	85.439	77.52	80.568	83.246	75.727	78.065	80.857	73.39	75.937	78.552	81.206	73.702	76.097	79.44	72.787	70.508	75.353	78.001	69.865	72.415	74.667	66.376	68.879	73.364	67.588
85.553	89.746	84.456	87.999	80.033	83.184	86.069	78.147	81.189	83.863	76.339	78.672	81.459	73.987	76.53	79.14	81.789	74.281	76.671	80.007	73.349	71.074	75.91	78.553	70.414	72.959	75.207	66.913	69.411	73.888	68.104
86.221	90.407	85.108	88.645	80.675	83.82	86.7	78.774	81.81	84.479	76.95	79.279	82.061	74.585	77.123	79.728	82.372	74.859	77.245	80.575	73.911	71.64	76.466	79.105	70.962	73.503	75.746	67.45	69.943	74.411	68.62
86.89	91.068	85.76	89.29	81.317	84.456	87.33	79.4	82.431	85.095	77.562	79.887	82.663	75.182	77.715	80.316	82.955	75.438	77.819	81.143	74.472	72.206	77.023	79.657	71.511	74.047	76.286	67.986	70.475	74.935	69.136
87.558	91.728	86.412	89.936	81.958	85.091	87.961	80.027	83.052	85.711	78.173	80.494	83.265	75.779	78.308	80.904	83.538	76.016	78.393	81.711	75.034	72.772	77.58	80.209	72.06	74.59	76.826	68.523	71.007	75.459	69.652
88.226	92.389	87.064	90.581	82.6	85.727	88.591	80.653	83.673	86.327	78.785	81.101	83.867	76.377	78.901	81.492	84.121	76.594	78.967	82.279	75.596	73.338	78.137	80.761	72.608	75.134	77.366	69.06	71.539	75.983	70.168
88.895	93.049	87.716	91.226	83.241	86.363	89.222	81.28	84.294	86.943	79.396	81.708	84.469	76.974	79.493	82.079	84.704	77.173	79.541	82.846	76.157	73.903	78.694	81.313	73.157	75.678	77.905	69.596	72.071	76.506	70.684
89.563	93.71	88.368	91.871	83.883	86.998	89.852	81.906	84.914	87.559	80.007	82.315	85.071	77.571	80.086	82.667	85.287	77.751	80.114	83.414	76.718	74.469	79.251	81.865	73.705	76.222	78.445	70.133	72.603	77.03	71.2
90.231	94.37	89.019	92.517	84.524	87.634	90.482	82.533	85.535	88.175	80.619	82.922	85.673	78.168	80.678	83.255	85.869	78.329	80.688	83.982	77.28	75.035	79.807	82.417	74.254	76.766	78.984	70.669	73.135	77.553	71.716
90.899	95.03	89.671	93.162	85.166	88.27	91.112	83.159	86.156	88.79	81.23	83.529	86.274	78.765	81.271	83.842	86.452	78.907	81.262	84.549	77.841	75.6	80.364	82.968	74.802	77.309	79.524	71.205	73.666	78.077	72.231
91.567	95.691	90.323	93.807	85.807	88.905	91.742	83.785	86.777	89.406	81.841	84.136	86.876	79.362	81.863	84.43	87.035	79.485	81.836	85.117	78.403	76.166	80.921	83.52	75.35	77.853	80.063	71.742	74.198	78.6	72.747
92.235	96.351	90.974	94.452	86.448	89.54	92.373	84.412	87.397	90.022	82.452	84.742	87.478	79.959	82.455	85.017	87.617	80.063	82.409	85.684	78.964	76.731	81.477	84.072	75.899	78.396	80.603	72.278	74.73	79.124	73.263
92.903	97.011	91.626	95.097	87.089	90.176	93.003	85.038	88.018	90.637	83.063	85.349	88.079	80.556	83.048	85.605	88.2	80.641	82.983	86.251	79.525	77.297	82.034	84.624	76.447	78.94	81.142	72.814	75.261	79.647	73.778
93.571	97.671	92.277	95.741	87.73	90.811	93.633	85.664	88.638	91.253	83.674	85.956	88.681	81.153	83.64	86.192	88.782	81.219	83.556	86.819	80.086	77.862	82.59	85.175	76.995	79.484	81.682	73.35	75.793	80.171	74.294
94.239	98.331	92.928	96.386	88.371	91.446	94.262	86.29	89.259	91.868	84.285	86.563	89.283	81.75	84.232	86.779	89.365	81.797	84.13	87.386	80.648	78.427	83.147	85.727	77.543	80.027	82.221	73.887	76.325	80.694	74.81
94.906	98.991	93.58	97.031	89.012	92.081	94.892	86.916	89.879	92.484	84.896	87.169	89.884	82.347	84.824	87.367	89.947	82.375	84.703	87.953	81.209	78.993	83.703	86.278	78.091	80.57	82.76	74.423	76.856	81.217	75.325
95.574	99.651	94.231	97.676	89.653	92.717	95.522	87.542	90.5	93.099	85.507	87.776	90.485	82.944	85.416	87.954	90.53	82.952	85.276	88.521	81.77	79.558	84.259	86.83	78.639	81.114	83.3	74.959	77.388	81.741	75.841
96.242	100.311	94.882	98.32	90.294	93.352	96.152	88.168	91.12	93.715	86.118	88.382	91.087	83.54	86.008	88.541	91.112	83.53	85.85	89.088	82.331	80.123	84.816	87.381	79.187	81.657	83.839	75.495	77.919	82.264	76.356
96.909	100.971	95.533	98.965	90.935	93.987	96.782	88.794	91.74	94.33	86.728	88.989	91.688	84.137	86.6	89.128	91.694	84.108	86.423	89.655	82.892	80.688	85.372	87.933	79.735	82.2	84.378	76.031	78.45	82.787	76.871
97.577	101.631	96.184	99.61	91.576	94.622	97.411	89.42	92.36	94.945	87.339	89.595	92.289	84.734	87.192	89.715	92.277	84.686	86.996	90.222	83.453	81.253	85.928	88.484	80.283	82.744	84.917	76.567	78.982	83.31	77.387
98.244	102.29	96.835	100.254	92.217	95.257	98.041	90.045	92.981	95.561	87.95	90.201	92.891	85.33	87.784	90.303	92.859	85.263	87.57	90.789	84.014	81.819	86.484	89.035	80.831	83.287	85.456	77.103	79.513	83.833	77.902
98.912	102.95	97.486	100.898	92.857	95.891	98.67	90.671	93.601	96.176	88.56	90.808	93.492	85.927	88.376	90.89	93.441	85.841	88.143	91.356	84.574	82.384	87.041	89.587	81.379	83.83	85.995	77.639	80.044	84.356	78.417
99.579	103.61	98.137	101.543	93.498	96.526	99.3	91.297	94.221	96.791	89.171	91.414	94.093	86.523	88.968	91.477	94.023	86.418	88.716	91.923	85.135	82.949	87.597	90.138	81.927	84.373	86.534	78.174	80.576	84.879	78.933
100.246	104.269	98.788	102.187	94.139	97.161	99.929	91.922	94.841	97.406	89.782	92.02	94.694	87.12	89.559	92.063	94.605	86.996	89.289	92.49	85.696	83.514	88.153	90.689	82.474	84.916	87.073	78.71	81.107	85.402	79.448
100.914	104.929	99.439	102.831	94.779	97.796	100.559	92.548	95.461	98.021	90.392	92.626	95.295	87.716	90.151	92.65	95.187	87.573	89.862	93.057	86.257	84.078	88.709	91.24	83.022	85.459	87.612	79.246	81.638	85.925	79.963
101.581	105.588	100.09	103.476	95.42	98.43	101.188	93.174	96.081	98.636	91.002	93.233	95.896	88.312	90.743	93.237	95.769	88.15	90.435	93.624	86.817	84.643	89.265	91.791	83.57	86.002	88.151	79.782	82.169	86.448	80.478
102.248	106.248	100.74	104.12	96.06	99.065	101.817	93.799	96.7	99.251	91.613	93.839	96.497	88.909	91.334	93.824	96.351	88.728	91.008	94.19	87.378	85.208	89.821	92.342	84.117	86.545	88.689	80.317	82.7	86.971	80.993
102.915	106.907	101.391	104.764	96.7	99.7	102.447	94.424	97.32	99.866	92.223	94.445	97.098	89.505	91.926	94.411	96.933	89.305	91.581	94.757	87.939	85.773	90.376	92.893	84.665	87.088	89.228	80.853	83.231	87.494	81.508
103.582	107.566	102.042	105.408	97.341	100.334	103.076	95.05	97.94	100.481	92.833	95.051	97.699	90.101	92.517	94.997	97.515	89.882	92.153	95.324	88.499	86.338	90.932	93.444	85.213	87.631	89.767	81.389	83.762	88.016	82.023
104.249	108.225	102.692	106.052	97.981	100.969	103.705	95.675	98.56	101.095	93.444	95.656	98.299	90.697	93.109	95.584	98.096	90.459	92.726	95.89	89.06	86.902	91.488	93.995	85.76	88.174	90.306	81.924	84.293	88.539	82.538
104.916	108.885	103.343	106.696	98.621	101.603	104.334	96.3	99.179	101.71	94.054	96.262	98.9	91.293	93.7	96.171	98.678	91.036	93.299	96.457	89.62	87.467	92.044	94.546	86.307	88.716	90.844	82.46	84.824	89.062	83.053
105.583	109.544	103.993	107.34	99.261	102.237	104.963	96.925	99.799	102.325	94.664	96.868	99.501	91.889	94.291	96.757	99.26	91.614	93.872	97.024	90.18	88.031	92.599	95.097	86.855	89.259	91.383	82.995	85.355	89.584	83.568
106.249	110.203	104.643	107.984	99.901	102.872	105.592	97.551	100.418	102.939	95.274	97.474	100.101	92.485	94.883	97.344	99.841	92.191	94.444	97.59	90.741	88.596	93.155	95.648	87.402	89.802	91.921	83.53	85.886	90.107	84.083
106.916	110.862	105.294	108.627	100.541	103.506	106.221	98.176	101.038	103.554	95.884	98.08	100.702	93.081	95.474	97.93	100.423	92.768	95.017	98.157	91.301	89.16	93.711	96.198	87.95	90.344	92.46	84.066	86.417	90.629	84.598
107.583	111.521	105.944	109.271	101.181	104.14	106.85	98.801	101.657	104.168	96.494	98.685	101.303	93.677	96.065	98.516	101.004	93.344	95.589	98.723	91.861	89.725	94.266	96.749	88.497	90.887	92.998	84.601	86.947	91.152	85.113
108.249	112.179	106.594	109.915	101.821	104.774	107.479	99.426	102.277	104.783	97.104	99.291	101.903	94.273	96.656	99.103	101.586	93.921	96.162	99.289	92.422	90.289	94.822	97.3	89.044	91.43	93.537	85.136	87.478	91.674	85.627
108.916	112.838	107.244	110.558	102.461	105.408	108.107	100.051	102.896	105.397	97.714	99.896	102.503	94.869	97.247	99.689	102.167	94.498	96.734	99.856	92.982	90.854	95.377	97.85	89.591	91.972	94.075	85.672	88.009	92.197	86.142
109.582	113.497	107.894	111.202	103.101	106.042	108.736	100.675	103.515	106.012	98.323	100.502	103.104	95.464	97.838	100.275	102.749	95.075	97.307	100.422	93.542	91.418	95.933	98.401	90.138	92.515	94.613	86.207	88.539	92.719	86.657
110.249	114.156	108.544	111.846	103.741	106.676	109.365	101.3	104.134	106.626	98.933	101.107	103.704	96.06	98.429	100.862	103.33	95.652	97.879	100.988	94.102	91.982	96.488	98.951	90.685	93.057	95.152	86.742	89.07	93.242	87.171
110.915	114.814	109.194	112.489	104.38	107.31	109.993	101.925	104.754	107.24	99.543	101.713	104.304	96.656	99.02	101.448	103.911	96.228	98.451	101.554	94.662	92.546	97.043	99.502	91.232	93.599	95.69	87.277	89.6	93.764	87.686
111.581	115.473	109.844	113.132	105.02	107.944	110.622	102.55	105.373	107.854	100.152	102.318	104.905	97.251	99.611	102.034	104.492	96.805	99.023	102.12	95.222	93.111	97.599	100.052	91.779	94.142	96.228	87.812	90.131	94.286	88.2
112.248	116.132	110.494	113.776	105.66	108.578	111.25	103.174	105.992	108.469	100.762	102.923	105.505	97.847	100.202	102.62	105.074	97.382	99.596	102.686	95.782	93.675	98.154	100.603	92.326	94.684	96.766	88.347	90.661	94.808	88.715
112.914	116.79	111.144	114.419	106.299	109.211	111.879	103.799	106.611	109.083	101.372	103.529	106.105	98.442	100.793	103.206	105.655	97.958	100.168	103.252	96.342	94.239	98.709	101.153	92.873	95.226	97.304	88.882	91.192	95.331	89.229
113.58	117.448	111.794	115.062	106.939	109.845	112.507	104.424	107.23	109.697	101.981	104.134	106.705	99.037	101.384	103.792	106.236	98.535	100.74	103.818	96.902	94.803	99.264	101.703	93.42	95.768	97.842	89.417	91.722	95.853	89.744
114.246	118.107	112.443	115.705	107.578	110.479	113.135	105.048	107.849	110.311	102.59	104.739	107.305	99.633	101.974	104.378	106.817	99.111	101.312	104.384	97.461	95.367	99.819	102.253	93.967	96.31	98.38	89.952	92.252	96.375	90.258
114.912	118.765	113.093	116.348	108.217	111.112	113.764	105.673	108.468	110.925	103.2	105.344	107.905	100.228	102.565	104.963	107.398	99.688	101.884	104.95	98.021	95.931	100.374	102.804	94.514	96.853	98.918	90.487	92.782	96.897	90.772
115.578	119.423	113.743	116.992	108.857	111.746	114.392	106.297	109.086	111.538	103.809	105.949	108.505	100.823	103.155	105.549	107.979	100.264	102.456	105.516	98.581	96.494	100.929	103.354	95.06	97.395	99.456	91.022	93.313	97.419	91.286
116.244	120.081	114.392	117.634	109.496	112.379	115.02	106.921	109.705	112.152	104.418	106.554	109.105	101.419	103.746	106.135	108.56	100.84	103.028	106.082	99.14	97.058	101.484	103.904	95.607	97.937	99.994	91.556	93.843	97.941	91.801
116.91	120.74	115.042	118.277	110.135	113.013	115.648	107.546	110.324	112.766	105.028	107.159	109.705	102.014	104.337	106.721	109.14	101.416	103.6	106.648	99.7	97.622	102.039	104.454	96.154	98.479	100.532	92.091	94.373	98.463	92.315
117.576	121.398	115.691	118.92	110.774	113.646	116.276	108.17	110.942	113.38	105.637	107.764	110.304	102.609	104.927	107.306	109.721	101.993	104.172	107.213	100.26	98.186	102.594	105.004	96.7	99.021	101.07	92.626	94.903	98.985	92.829
118.241	122.056	116.34	119.563	111.413	114.279	116.904	108.794	111.561	113.993	106.246	108.369	110.904	103.204	105.517	107.892	110.302	102.569	104.743	107.779	100.819	98.75	103.149	105.554	97.247	99.562	101.608	93.16	95.433	99.506	93.343
118.907	122.714	116.99	120.206	112.052	114.912	117.532	109.418	112.18	114.607	106.855	108.973	111.504	103.799	106.108	108.478	110.883	103.145	105.315	108.345	101.379	99.313	103.703	106.104	97.793	100.104	102.145	93.695	95.963	100.028	93.857
119.573	123.372	117.639	120.849	112.691	115.546	118.16	110.042	112.798	115.221	107.464	109.578	112.103	104.394	106.698	109.063	111.463	103.721	105.887	108.91	101.938	99.877	104.258	106.654	98.34	100.646	102.683	94.229	96.493	100.55	94.371
120.238	124.029	118.288	121.491	113.33	116.179	118.788	110.666	113.416	115.834	108.073	110.183	112.703	104.989	107.288	109.648	112.044	104.297	106.458	109.476	102.497	100.44	104.813	107.203	98.886	101.188	103.221	94.764	97.023	101.072	94.885
120.904	124.687	118.937	122.134	113.969	116.812	119.416	111.29	114.035	116.448	108.682	110.787	113.302	105.584	107.878	110.234	112.624	104.873	107.03	110.041	103.057	101.004	105.368	107.753	99.433	101.729	103.758	95.298	97.553	101.593	95.399
121.569	125.345	119.586	122.776	114.608	117.445	120.043	111.914	114.653	117.061	109.291	111.392	113.902	106.179	108.469	110.819	113.205	105.449	107.601	110.606	103.616	101.567	105.922	108.303	99.979	102.271	104.296	95.833	98.083	102.115	95.913
122.234	126.002	120.235	123.419	115.247	118.078	120.671	112.538	115.271	117.674	109.9	111.997	114.501	106.773	109.059	111.405	113.785	106.025	108.173	111.172	104.175	102.131	106.477	108.853	100.525	102.813	104.833	96.367	98.612	102.636	96.427
122.9	126.66	120.884	124.061	115.885	118.711	121.299	113.162	115.89	118.288	110.508	112.601	115.101	107.368	109.649	111.99	114.366	106.601	108.744	111.737	104.734	102.694	107.031	109.402	101.071	103.354	105.371	96.901	99.142	103.158	96.941
123.565	127.318	121.533	124.704	116.524	119.344	121.926	113.785	116.508	118.901	111.117	113.205	115.7	107.963	110.239	112.575	114.946	107.176	109.316	112.302	105.293	103.257	107.586	109.952	101.618	103.896	105.908	97.436	99.672	103.679	97.454
124.23	127.975	122.182	125.346	117.163	119.976	122.554	114.409	117.126	119.514	111.726	113.81	116.299	108.557	110.829	113.16	115.526	107.752	109.887	112.868	105.853	103.821	108.14	110.501	102.164	104.437	106.445	97.97	100.201	104.201	97.968
124.895	128.633	122.831	125.988	117.801	120.609	123.181	115.033	117.744	120.127	112.334	114.414	116.898	109.152	111.419	113.745	116.107	108.328	110.458	113.433	106.412	104.384	108.694	111.051	102.71	104.979	106.983	98.504	100.731	104.722	98.482
125.56	129.29	123.479	126.631	118.44	121.242	123.808	115.656	118.362	120.74	112.943	115.018	117.497	109.746	112.008	114.33	116.687	108.903	111.03	113.998	106.971	104.947	109.249	111.6	103.256	105.52	107.52	99.038	101.261	105.244	98.995
126.225	129.947	124.128	127.273	119.078	121.874	124.436	116.28	118.98	121.353	113.551	115.623	118.097	110.341	112.598	114.915	117.267	109.479	111.601	114.563	107.53	105.51	109.803	112.15	103.802	106.061	108.057	99.572	101.79	105.765	99.509
126.89	130.604	124.777	127.915	119.716	122.507	125.063	116.903	119.598	121.966	114.16	116.227	118.696	110.935	113.188	115.5	117.847	110.054	112.172	115.128	108.088	106.073	110.357	112.699	104.348	106.603	108.594	100.106	102.32	106.286	100.022
127.555	131.262	125.425	128.557	120.355	123.14	125.69	117.527	120.215	122.579	114.768	116.831	119.295	111.53	113.778	116.085	118.427	110.63	112.743	115.693	108.647	106.636	110.911	113.248	104.894	107.144	109.131	100.64	102.849	106.807	100.536
128.22	131.919	126.074	129.199	120.993	123.772	126.317	118.15	120.833	123.192	115.376	117.435	119.893	112.124	114.367	116.67	119.007	111.205	113.314	116.258	109.206	107.199	111.465	113.798	105.44	107.685	109.669	101.174	103.378	107.329	101.049
128.885	132.576	126.722	129.841	121.631	124.404	126.944	118.773	121.451	123.805	115.985	118.039	120.492	112.718	114.957	117.255	119.587	111.781	113.885	116.823	109.765	107.762	112.019	114.347	105.985	108.226	110.206	101.708	103.908	107.85	101.563
129.549	133.233	127.37	130.483	122.269	125.037	127.572	119.397	122.069	124.418	116.593	118.643	121.091	113.312	115.546	117.839	120.167	112.356	114.456	117.388	110.324	108.325	112.573	114.896	106.531	108.767	110.743	102.242	104.437	108.371	102.076
130.214	133.89	128.019	131.124	122.907	125.669	128.199	120.02	122.686	125.03	117.201	119.247	121.69	113.906	116.136	118.424	120.747	112.931	115.027	117.952	110.882	108.888	113.127	115.445	107.077	109.308	111.28	102.776	104.966	108.892	102.59
130.879	134.547	128.667	131.766	123.545	126.301	128.825	120.643	123.304	125.643	117.809	119.851	122.289	114.501	116.725	119.009	121.327	113.507	115.598	118.517	111.441	109.45	113.681	115.994	107.623	109.849	111.816	103.31	105.495	109.413	103.103
131.543	135.203	129.315	132.408	124.183	126.933	129.452	121.266	123.921	126.256	118.417	120.454	122.887	115.095	117.315	119.593	121.906	114.082	116.169	119.082	111.999	110.013	114.235	116.543	108.168	110.39	112.353	103.843	106.025	109.934	103.616
132.208	135.86	129.963	133.049	124.821	127.566	130.079	121.889	124.539	126.868	119.025	121.058	123.486	115.689	117.904	120.178	122.486	114.657	116.739	119.646	112.558	110.576	114.789	117.092	108.714	110.931	112.89	104.377	106.554	110.455	104.129
132.872	136.517	130.611	133.691	125.459	128.198	130.706	122.512	125.156	127.481	119.633	121.662	124.085	116.282	118.493	120.762	123.066	115.232	117.31	120.211	113.116	111.139	115.343	117.641	109.259	111.472	113.427	104.911	107.083	110.976	104.642
133.536	137.174	131.259	134.332	126.097	128.83	131.333	123.135	125.773	128.093	120.241	122.265	124.683	116.876	119.082	121.347	123.645	115.807	117.881	120.775	113.675	111.701	115.896	118.19	109.805	112.013	113.964	105.444	107.612	111.496	105.156
134.201	137.83	131.907	134.974	126.735	129.462	131.959	123.758	126.391	128.705	120.849	122.869	125.281	117.47	119.672	121.931	124.225	116.382	118.451	121.34	114.233	112.264	116.45	118.739	110.35	112.554	114.5	105.978	108.141	112.017	105.669
134.865	138.487	132.555	135.615	127.372	130.094	132.586	124.38	127.008	129.318	121.457	123.472	125.88	118.064	120.261	122.516	124.804	116.957	119.022	121.904	114.791	112.826	117.004	119.288	110.896	113.095	115.037	106.511	108.67	112.538	106.182
135.529	139.143	133.203	136.257	128.01	130.725	133.212	125.003	127.625	129.93	122.064	124.076	126.478	118.658	120.85	123.1	125.384	117.532	119.592	122.469	115.35	113.389	117.557	119.837	111.441	113.635	115.573	107.045	109.199	113.059	106.695
136.193	139.8	133.851	136.898	128.647	131.357	133.839	125.626	128.242	130.542	122.672	124.679	127.077	119.251	121.439	123.684	125.963	118.107	120.163	123.033	115.908	113.951	118.111	120.385	111.986	114.176	116.11	107.578	109.727	113.579	107.208
136.857	140.456	134.498	137.539	129.285	131.989	134.465	126.249	128.859	131.154	123.28	125.283	127.675	119.845	122.028	124.268	126.542	118.681	120.733	123.597	116.466	114.513	118.664	120.934	112.532	114.716	116.646	108.112	110.256	114.1	107.72
137.521	141.112	135.146	138.18	129.922	132.621	135.092	126.871	129.476	131.766	123.887	125.886	128.273	120.439	122.617	124.852	127.122	119.256	121.303	124.162	117.024	115.076	119.218	121.482	113.077	115.257	117.183	108.645	110.785	114.62	108.233
138.185	141.769	135.794	138.821	130.56	133.252	135.718	127.494	130.093	132.379	124.495	126.489	128.871	121.032	123.206	125.437	127.701	119.831	121.874	124.726	117.582	115.638	119.771	122.031	113.622	115.798	117.719	109.178	111.314	115.141	108.746
138.849	142.425	136.441	139.463	131.197	133.884	136.344	128.116	130.71	132.991	125.102	127.092	129.469	121.625	123.794	126.021	128.28	120.405	122.444	125.29	118.14	116.2	120.325	122.58	114.167	116.338	118.256	109.711	111.842	115.661	109.259
139.513	143.081	137.089	140.104	131.834	134.515	136.971	128.738	131.327	133.602	125.71	127.695	130.067	122.219	124.383	126.605	128.859	120.98	123.014	125.854	118.698	116.762	120.878	123.128	114.712	116.878	118.792	110.245	112.371	116.182	109.772
140.177	143.737	137.736	140.744	132.471	135.147	137.597	129.361	131.944	134.214	126.317	128.299	130.665	122.812	124.972	127.188	129.438	121.554	123.584	126.418	119.256	117.324	121.431	123.676	115.257	117.419	119.328	110.778	112.9	116.702	110.284
140.84	144.393	138.384	141.385	133.109	135.778	138.223	129.983	132.56	134.826	126.924	128.902	131.263	123.406	125.56	127.772	130.017	122.129	124.154	126.982	119.814	117.886	121.984	124.225	115.802	117.959	119.864	111.311	113.428	117.223	110.797
141.504	145.049	139.031	142.026	133.746	136.409	138.849	130.605	133.177	135.438	127.532	129.505	131.861	123.999	126.149	128.356	130.596	122.703	124.725	127.546	120.372	118.448	122.537	124.773	116.347	118.499	120.401	111.844	113.957	117.743	111.31
142.167	145.705	139.678	142.667	134.383	137.041	139.475	131.228	133.794	136.05	128.139	130.107	132.459	124.592	126.738	128.94	131.175	123.278	125.295	128.11	120.93	119.01	123.091	125.321	116.892	119.04	120.937	112.377	114.485	118.263	111.822
142.831	146.36	140.325	143.308	135.02	137.672	140.101	131.85	134.41	136.661	128.746	130.71	133.057	125.185	127.326	129.524	131.754	123.852	125.864	128.674	121.488	119.572	123.644	125.87	117.437	119.58	121.473	112.91	115.013	118.783	112.335
143.494	147.016	140.972	143.948	135.657	138.303	140.727	132.472	135.027	137.273	129.353	131.313	133.654	125.778	127.914	130.107	132.333	124.426	126.434	129.238	122.045	120.134	124.197	126.418	117.981	120.12	122.009	113.443	115.542	119.304	112.847
144.158	147.672	141.619	144.589	136.294	138.934	141.352	133.094	135.643	137.884	129.96	131.916	134.252	126.371	128.503	130.691	132.912	125	127.004	129.801	122.603	120.696	124.75	126.966	118.526	120.66	122.545	113.976	116.07	119.824	113.359
144.821	148.327	142.266	145.229	136.93	139.565	141.978	133.716	136.26	138.496	130.567	132.519	134.85	126.964	129.091	131.274	133.49	125.575	127.574	130.365	123.16	121.258	125.303	127.514	119.071	121.2	123.081	114.508	116.598	120.344	113.872
145.484	148.983	142.913	145.87	137.567	140.196	142.604	134.338	136.876	139.107	131.174	133.121	135.447	127.557	129.679	131.858	134.069	126.149	128.144	130.929	123.718	121.819	125.855	128.062	119.615	121.74	123.617	115.041	117.126	120.864	114.384
146.147	149.639	143.56	146.51	138.204	140.827	143.23	134.959	137.492	139.719	131.781	133.724	136.045	128.15	130.268	132.441	134.648	126.723	128.713	131.492	124.275	122.381	126.408	128.61	120.16	122.28	124.152	115.574	117.655	121.384	114.896
146.81	150.294	144.207	147.151	138.84	141.458	143.855	135.581	138.108	140.33	132.387	134.326	136.642	128.743	130.856	133.025	135.226	127.297	129.283	132.056	124.833	122.942	126.961	129.158	120.705	122.82	124.688	116.107	118.183	121.904	115.409
147.474	150.949	144.854	147.791	139.477	142.089	144.481	136.203	138.725	140.941	132.994	134.929	137.239	129.336	131.444	133.608	135.805	127.871	129.853	132.619	125.39	123.504	127.514	129.706	121.249	123.36	125.224	116.639	118.711	122.424	115.921
148.137	151.605	145.501	148.431	140.113	142.719	145.106	136.825	139.341	141.553	133.601	135.531	137.837	129.928	132.032	134.192	136.383	128.445	130.422	133.183	125.948	124.066	128.066	130.254	121.794	123.899	125.76	117.172	119.239	122.943	116.433
148.799	152.26	146.147	149.071	140.75	143.35	145.732	137.446	139.957	142.164	134.208	136.134	138.434	130.521	132.62	134.775	136.962	129.019	130.992	133.746	126.505	124.627	128.619	130.802	122.338	124.439	126.295	117.704	119.767	123.463	116.945
149.462	152.915	146.794	149.711	141.386	143.981	146.357	138.068	140.573	142.775	134.814	136.736	139.031	131.114	133.208	135.358	137.54	129.592	131.561	134.31	127.062	125.188	129.172	131.349	122.882	124.979	126.831	118.237	120.295	123.983	117.457
150.125	153.57	147.44	150.351	142.023	144.611	146.982	138.689	141.189	143.386	135.421	137.338	139.628	131.706	133.796	135.941	138.118	130.166	132.131	134.873	127.619	125.75	129.724	131.897	123.427	125.519	127.366	118.769	120.823	124.503	117.969
150.788	154.225	148.087	150.991	142.659	145.242	147.607	139.311	141.805	143.997	136.027	137.94	140.226	132.299	134.384	136.524	138.697	130.74	132.7	135.436	128.177	126.311	130.277	132.445	123.971	126.058	127.902	119.302	121.35	125.022	118.481
151.451	154.88	148.733	151.631	143.295	145.872	148.233	139.932	142.42	144.608	136.634	138.543	140.823	132.891	134.972	137.107	139.275	131.313	133.269	135.999	128.734	126.872	130.829	132.992	124.515	126.598	128.437	119.834	121.878	125.542	118.993
152.113	155.535	149.38	152.271	143.931	146.503	148.858	140.553	143.036	145.219	137.24	139.145	141.42	133.484	135.559	137.69	139.853	131.887	133.838	136.562	129.291	127.433	131.381	133.54	125.059	127.137	128.973	120.366	122.406	126.062	119.505
152.776	156.19	150.026	152.911	144.567	147.133	149.483	141.175	143.652	145.83	137.846	139.747	142.017	134.076	136.147	138.273	140.431	132.461	134.408	137.126	129.848	127.995	131.934	134.087	125.603	127.677	129.508	120.898	122.934	126.581	120.017
153.438	156.845	150.672	153.551	145.203	147.763	150.108	141.796	144.268	146.44	138.453	140.349	142.614	134.668	136.735	138.856	141.009	133.034	134.977	137.689	130.405	128.556	132.486	134.635	126.147	128.216	130.043	121.431	123.461	127.101	120.529
154.101	157.5	151.318	154.19	145.839	148.393	150.733	142.417	144.883	147.051	139.059	140.951	143.21	135.26	137.322	139.439	141.587	133.608	135.546	138.252	130.962	129.117	133.038	135.182	126.691	128.755	130.579	121.963	123.989	127.62	121.04
154.763	158.155	151.964	154.83	146.475	149.024	151.358	143.038	145.499	147.662	139.665	141.553	143.807	135.853	137.91	140.022	142.165	134.181	136.115	138.815	131.518	129.678	133.59	135.729	127.235	129.295	131.114	122.495	124.516	128.139	121.552
155.425	158.809	152.61	155.47	147.111	149.654	151.983	143.659	146.114	148.272	140.271	142.154	144.404	136.445	138.497	140.604	142.743	134.754	136.684	139.377	132.075	130.239	134.143	136.277	127.779	129.834	131.649	123.027	125.044	128.659	122.064
156.088	159.464	153.256	156.109	147.747	150.284	152.607	144.28	146.73	148.883	140.877	142.756	145.001	137.037	139.085	141.187	143.321	135.328	137.253	139.94	132.632	130.8	134.695	136.824	128.323	130.373	132.184	123.559	125.571	129.178	122.575
156.75	160.118	153.902	156.749	148.383	150.914	153.232	144.901	147.345	149.493	141.483	143.358	145.597	137.629	139.672	141.77	143.898	135.901	137.822	140.503	133.189	131.36	135.247	137.371	128.867	130.912	132.719	124.091	126.099	129.697	123.087
157.412	160.773	154.548	157.388	149.018	151.544	153.857	145.522	147.96	150.104	142.089	143.96	146.194	138.221	140.259	142.352	144.476	136.474	138.39	141.066	133.745	131.921	135.799	137.918	129.411	131.452	133.254	124.623	126.626	130.217	123.599
158.074	161.427	155.194	158.027	149.654	152.174	154.481	146.143	148.576	150.714	142.695	144.561	146.79	138.813	140.847	142.935	145.054	137.047	138.959	141.629	134.302	132.482	136.351	138.466	129.954	131.991	133.789	125.155	127.154	130.736	124.11
158.736	162.082	155.84	158.667	150.289	152.803	155.106	146.764	149.191	151.325	143.301	145.163	147.387	139.405	141.434	143.517	145.631	137.62	139.528	142.191	134.858	133.043	136.902	139.013	130.498	132.53	134.324	125.687	127.681	131.255	124.621
159.398	162.736	156.485	159.306	150.925	153.433	155.73	147.384	149.806	151.935	143.906	145.764	147.983	139.996	142.021	144.1	146.209	138.193	140.097	142.754	135.415	133.603	137.454	139.56	131.042	133.069	134.859	126.218	128.208	131.774	125.133
160.06	163.39	157.131	159.945	151.56	154.063	156.355	148.005	150.421	152.545	144.512	146.366	148.58	140.588	142.608	144.682	146.787	138.766	140.665	143.316	135.971	134.164	138.006	140.107	131.585	133.608	135.394	126.75	128.735	132.293	125.644
160.722	164.044	157.777	160.584	152.196	154.692	156.979	148.625	151.036	153.155	145.118	146.967	149.176	141.18	143.195	145.264	147.364	139.339	141.234	143.879	136.528	134.725	138.558	140.654	132.129	134.147	135.929	127.282	129.262	132.812	126.156
161.383	164.698	158.422	161.223	152.831	155.322	157.603	149.246	151.651	153.765	145.723	147.568	149.772	141.771	143.782	145.846	147.941	139.912	141.802	144.441	137.084	135.285	139.109	141.2	132.672	134.685	136.464	127.813	129.789	133.331	126.667
162.045	165.352	159.067	161.862	153.466	155.952	158.228	149.866	152.266	154.375	146.329	148.17	150.368	142.363	144.369	146.429	148.519	140.485	142.371	145.004	137.64	135.845	139.661	141.747	133.216	135.224	136.998	128.345	130.317	133.85	127.178
162.707	166.006	159.713	162.501	154.102	156.581	158.852	150.487	152.881	154.985	146.934	148.771	150.964	142.955	144.956	147.011	149.096	141.058	142.939	145.566	138.197	136.406	140.213	142.294	133.759	135.763	137.533	128.877	130.844	134.369	127.689
163.368	166.66	160.358	163.14	154.737	157.21	159.476	151.107	153.496	155.595	147.54	149.372	151.561	143.546	145.543	147.593	149.673	141.63	143.508	146.128	138.753	136.966	140.764	142.841	134.302	136.302	138.068	129.408	131.37	134.887	128.2
164.03	167.314	161.003	163.779	155.372	157.84	160.1	151.727	154.11	156.205	148.145	149.973	152.157	144.137	146.13	148.175	150.251	142.203	144.076	146.69	139.309	137.526	141.316	143.387	134.846	136.84	138.602	129.94	131.897	135.406	128.711
164.691	167.968	161.649	164.417	156.007	158.469	160.724	152.348	154.725	156.815	148.75	150.574	152.753	144.729	146.717	148.757	150.828	142.776	144.644	147.253	139.865	138.087	141.867	143.934	135.389	137.379	139.137	130.471	132.424	135.925	129.222
165.352	168.622	162.294	165.056	156.642	159.098	161.348	152.968	155.34	157.425	149.356	151.175	153.348	145.32	147.303	149.339	151.405	143.348	145.212	147.815	140.421	138.647	142.419	144.481	135.932	137.917	139.671	131.002	132.951	136.444	129.733
166.014	169.275	162.939	165.695	157.277	159.727	161.972	153.588	155.954	158.034	149.961	151.776	153.944	145.911	147.89	149.921	151.982	143.921	145.781	148.377	140.977	139.207	142.97	145.027	136.475	138.456	140.205	131.534	133.478	136.962	130.244
166.675	169.929	163.584	166.333	157.912	160.356	162.596	154.208	156.569	158.644	150.566	152.377	154.54	146.503	148.476	150.503	152.559	144.493	146.349	148.939	141.533	139.767	143.521	145.574	137.018	138.994	140.74	132.065	134.004	137.481	130.755
167.336	170.582	164.229	166.972	158.546	160.986	163.22	154.828	157.183	159.254	151.171	152.978	155.136	147.094	149.063	151.084	153.136	145.066	146.917	149.501	142.089	140.327	144.072	146.12	137.561	139.533	141.274	132.596	134.531	137.999	131.266
167.997	171.236	164.874	167.61	159.181	161.614	163.843	155.448	157.798	159.863	151.776	153.579	155.732	147.685	149.649	151.666	153.713	145.638	147.485	150.063	142.645	140.887	144.624	146.666	138.104	140.071	141.808	133.127	135.058	138.518	131.777
168.658	171.889	165.518	168.248	159.816	162.243	164.467	156.068	158.412	160.473	152.381	154.179	156.327	148.276	150.236	152.248	154.29	146.21	148.053	150.625	143.201	141.447	145.175	147.213	138.647	140.609	142.343	133.658	135.584	139.036	132.288
169.319	172.542	166.163	168.887	160.45	162.872	165.091	156.688	159.026	161.082	152.986	154.78	156.923	148.867	150.822	152.829	154.866	146.782	148.621	151.187	143.756	142.007	145.726	147.759	139.19	141.148	142.877	134.189	136.111	139.555	132.798
169.98	173.196	166.808	169.525	161.085	163.501	165.714	157.307	159.64	161.691	153.591	155.381	157.518	149.458	151.408	153.411	155.443	147.355	149.188	151.748	144.312	142.567	146.277	148.305	139.733	141.686	143.411	134.72	136.637	140.073	133.309
170.641	173.849	167.453	170.163	161.719	164.13	166.338	157.927	160.255	162.301	154.195	155.981	158.114	150.049	151.995	153.992	156.02	147.927	149.756	152.31	144.868	143.127	146.828	148.851	140.276	142.224	143.945	135.251	137.164	140.591	133.82
171.302	174.502	168.097	170.801	162.354	164.758	166.961	158.547	160.869	162.91	154.8	156.582	158.709	150.639	152.581	154.574	156.596	148.499	150.324	152.872	145.423	143.686	147.379	149.397	140.819	142.762	144.479	135.782	137.69	141.109	134.33
171.963	175.155	168.742	171.439	162.988	165.387	167.584	159.166	161.483	163.519	155.405	157.182	159.305	151.23	153.167	155.155	157.173	149.071	150.892	153.433	145.979	144.246	147.93	149.944	141.361	143.3	145.013	136.313	138.217	141.628	134.841
172.623	175.808	169.386	172.077	163.622	166.016	168.208	159.786	162.097	164.128	156.009	157.782	159.9	151.821	153.753	155.736	157.749	149.643	151.459	153.995	146.534	144.806	148.48	150.49	141.904	143.838	145.547	136.844	138.743	142.146	135.351
173.284	176.461	170.03	172.715	164.257	166.644	168.831	160.405	162.711	164.737	156.614	158.383	160.495	152.412	154.339	156.318	158.326	150.215	152.027	154.556	147.09	145.365	149.031	151.036	142.447	144.376	146.081	137.375	139.269	142.664	135.862
173.944	177.114	170.675	173.353	164.891	167.273	169.454	161.025	163.325	165.346	157.219	158.983	161.09	153.002	154.925	156.899	158.902	150.787	152.594	155.118	147.645	145.925	149.582	151.581	142.989	144.914	146.615	137.906	139.795	143.182	136.372
174.605	177.767	171.319	173.991	165.525	167.901	170.077	161.644	163.938	165.955	157.823	159.583	161.685	153.593	155.511	157.48	159.479	151.358	153.162	155.679	148.201	146.484	150.133	152.127	143.532	145.452	147.148	138.436	140.321	143.7	136.883
175.265	178.42	171.963	174.629	166.159	168.529	170.7	162.263	164.552	166.564	158.427	160.183	162.281	154.183	156.097	158.061	160.055	151.93	153.729	156.241	148.756	147.044	150.683	152.673	144.074	145.99	147.682	138.967	140.847	144.218	137.393
175.926	179.072	172.607	175.266	166.793	169.158	171.323	162.883	165.166	167.173	159.032	160.783	162.876	154.774	156.683	158.642	160.631	152.502	154.297	156.802	149.311	147.603	151.234	153.219	144.616	146.528	148.216	139.497	141.374	144.736	137.903
176.586	179.725	173.251	175.904	167.427	169.786	171.946	163.502	165.78	167.782	159.636	161.383	163.471	155.364	157.268	159.223	161.207	153.074	154.864	157.363	149.866	148.162	151.784	153.765	145.159	147.065	148.749	140.028	141.9	145.254	138.413
177.246	180.378	173.895	176.542	168.061	170.414	172.569	164.121	166.393	168.391	160.24	161.983	164.065	155.954	157.854	159.804	161.783	153.645	155.431	157.924	150.421	148.722	152.335	154.31	145.701	147.603	149.283	140.559	142.425	145.772	138.923
177.906	181.03	174.539	177.179	168.695	171.042	173.192	164.74	167.007	168.999	160.844	162.583	164.66	156.545	158.44	160.385	162.36	154.217	155.998	158.485	150.976	149.281	152.885	154.856	146.243	148.141	149.817	141.089	142.951	146.289	139.434
178.566	181.683	175.183	177.817	169.328	171.67	173.815	165.359	167.62	169.608	161.449	163.183	165.255	157.135	159.025	160.966	162.936	154.788	156.566	159.047	151.531	149.84	153.436	155.402	146.786	148.678	150.35	141.619	143.477	146.807	139.944
179.226	182.335	175.827	178.454	169.962	172.298	174.438	165.978	168.234	170.216	162.053	163.783	165.85	157.725	159.611	161.547	163.512	155.36	157.133	159.608	152.086	150.399	153.986	155.947	147.328	149.216	150.884	142.15	144.003	147.325	140.454
179.886	182.987	176.471	179.091	170.596	172.926	175.06	166.597	168.847	170.825	162.657	164.383	166.445	158.315	160.196	162.127	164.087	155.931	157.7	160.169	152.641	150.958	154.536	156.493	147.87	149.753	151.417	142.68	144.529	147.842	140.964
180.546	183.64	177.115	179.729	171.229	173.554	175.683	167.216	169.46	171.433	163.26	164.982	167.039	158.905	160.782	162.708	164.663	156.502	158.267	160.73	153.196	151.517	155.086	157.038	148.412	150.291	151.95	143.21	145.055	148.36	141.474
181.206	184.292	177.758	180.366	171.863	174.182	176.305	167.834	170.073	172.042	163.864	165.582	167.634	159.495	161.367	163.289	165.239	157.074	158.834	161.29	153.751	152.076	155.637	157.583	148.954	150.828	152.484	143.74	145.58	148.878	141.983
181.866	184.944	178.402	181.003	172.496	174.809	176.928	168.453	170.687	172.65	164.468	166.182	168.228	160.085	161.952	163.869	165.815	157.645	159.401	161.851	154.306	152.635	156.187	158.129	149.496	151.365	153.017	144.271	146.106	149.395	142.493
182.525	185.596	179.045	181.64	173.13	175.437	177.55	169.072	171.3	173.258	165.072	166.781	168.823	160.675	162.538	164.45	166.391	158.216	159.967	162.412	154.861	153.194	156.737	158.674	150.038	151.903	153.55	144.801	146.631	149.912	143.003
183.185	186.248	179.689	182.277	173.763	176.064	178.173	169.69	171.913	173.866	165.676	167.381	169.417	161.265	163.123	165.03	166.966	158.787	160.534	162.973	155.415	153.753	157.287	159.219	150.579	152.44	154.083	145.331	147.157	150.43	143.513
183.845	186.9	180.332	182.914	174.396	176.692	178.795	170.309	172.526	174.475	166.279	167.98	170.011	161.854	163.708	165.611	167.542	159.358	161.101	163.533	155.97	154.311	157.837	159.764	151.121	152.977	154.616	145.861	147.682	150.947	144.023
184.504	187.552	180.976	183.551	175.029	177.319	179.417	170.927	173.139	175.083	166.883	168.579	170.606	162.444	164.293	166.191	168.117	159.929	161.668	164.094	156.524	154.87	158.387	160.309	151.663	153.514	155.149	146.391	148.208	151.464	144.532
185.164	188.204	181.619	184.188	175.662	177.947	180.039	171.546	173.752	175.691	167.486	169.179	171.2	163.034	164.878	166.771	168.693	160.5	162.234	164.655	157.079	155.429	158.937	160.855	152.205	154.051	155.682	146.921	148.733	151.982	145.042
185.823	188.855	182.262	184.824	176.296	178.574	180.661	172.164	174.364	176.299	168.09	169.778	171.794	163.623	165.463	167.352	169.268	161.071	162.801	165.215	157.633	155.987	159.486	161.4	152.746	154.588	156.215	147.45	149.258	152.499	145.551
186.482	189.507	182.905	185.461	176.929	179.202	181.283	172.782	174.977	176.907	168.693	170.377	172.388	164.213	166.048	167.932	169.844	161.642	163.367	165.776	158.188	156.546	160.036	161.945	153.288	155.125	156.748	147.98	149.784	153.016	146.061
187.142	190.159	183.548	186.098	177.561	179.829	181.905	173.401	175.59	177.514	169.297	170.976	172.982	164.802	166.633	168.512	170.419	162.213	163.934	166.336	158.742	157.104	160.586	162.489	153.829	155.662	157.281	148.51	150.309	153.533	146.57
187.801	190.81	184.191	186.734	178.194	180.456	182.527	174.019	176.202	178.122	169.9	171.575	173.576	165.392	167.218	169.092	170.994	162.784	164.5	166.896	159.296	157.663	161.136	163.034	154.371	156.199	157.814	149.04	150.834	154.05	147.08
188.46	191.462	184.834	187.371	178.827	181.083	183.149	174.637	176.815	178.73	170.503	172.174	174.17	165.981	167.802	169.672	171.57	163.354	165.067	167.457	159.851	158.221	161.685	163.579	154.912	156.736	158.347	149.569	151.359	154.567	147.589
189.119	192.113	185.477	188.007	179.46	181.71	183.771	175.255	177.428	179.338	171.106	172.773	174.764	166.57	168.387	170.252	172.145	163.925	165.633	168.017	160.405	158.779	162.235	164.124	155.454	157.273	158.879	150.099	151.884	155.084	148.099
189.778	192.765	186.12	188.644	180.093	182.337	184.393	175.873	178.04	179.945	171.709	173.372	175.358	167.16	168.972	170.832	172.72	164.496	166.199	168.577	160.959	159.338	162.784	164.669	155.995	157.809	159.412	150.629	152.409	155.601	148.608
190.437	193.416	186.763	189.28	180.725	182.964	185.014	176.491	178.652	180.553	172.313	173.971	175.952	167.749	169.556	171.412	173.295	165.066	166.765	169.137	161.513	159.896	163.334	165.213	156.536	158.346	159.945	151.158	152.934	156.118	149.117
191.096	194.067	187.405	189.916	181.358	183.591	185.636	177.109	179.265	181.16	172.916	174.57	176.546	168.338	170.141	171.992	173.87	165.637	167.331	169.697	162.067	160.454	163.883	165.758	157.078	158.883	160.477	151.688	153.459	156.635	149.626
191.754	194.718	188.048	190.553	181.99	184.218	186.258	177.726	179.877	181.768	173.519	175.168	177.139	168.927	170.725	172.571	174.445	166.207	167.898	170.258	162.621	161.012	164.432	166.302	157.619	159.419	161.01	152.217	153.984	157.152	150.135
192.413	195.369	188.691	191.189	182.623	184.844	186.879	178.344	180.489	182.375	174.121	175.767	177.733	169.516	171.31	173.151	175.02	166.777	168.464	170.818	163.175	161.57	164.982	166.847	158.16	159.956	161.542	152.746	154.509	157.668	150.644
193.072	196.021	189.333	191.825	183.255	185.471	187.501	178.962	181.101	182.982	174.724	176.366	178.326	170.105	171.894	173.731	175.594	167.348	169.03	171.377	163.729	162.128	165.531	167.391	158.701	160.492	162.074	153.276	155.034	158.185	151.154
193.73	196.672	189.975	192.461	183.888	186.098	188.122	179.58	181.714	183.59	175.327	176.964	178.92	170.694	172.478	174.31	176.169	167.918	169.596	171.937	164.283	162.686	166.08	167.936	159.242	161.029	162.607	153.805	155.559	158.702	151.663
194.389	197.322	190.618	193.097	184.52	186.724	188.743	180.197	182.326	184.197	175.93	177.563	179.513	171.283	173.063	174.89	176.744	168.488	170.161	172.497	164.837	163.244	166.629	168.48	159.783	161.565	163.139	154.334	156.083	159.218	152.171
195.047	197.973	191.26	193.733	185.152	187.351	189.365	180.815	182.938	184.804	176.532	178.161	180.107	171.872	173.647	175.469	177.319	169.058	170.727	173.057	165.39	163.802	167.178	169.024	160.324	162.101	163.671	154.863	156.608	159.735	152.68
195.706	198.624	191.902	194.368	185.784	187.977	189.986	181.432	183.55	185.411	177.135	178.76	180.7	172.46	174.231	176.049	177.893	169.628	171.293	173.617	165.944	164.36	167.727	169.569	160.865	162.638	164.204	155.392	157.133	160.251	153.189
196.364	199.275	192.545	195.004	186.416	188.604	190.607	182.049	184.161	186.018	177.738	179.358	181.293	173.049	174.815	176.628	178.468	170.198	171.859	174.176	166.498	164.917	168.276	170.113	161.406	163.174	164.736	155.921	157.657	160.768	153.698
197.022	199.925	193.187	195.64	187.048	189.23	191.228	182.667	184.773	186.625	178.34	179.956	181.886	173.638	175.399	177.207	179.042	170.768	172.424	174.736	167.051	165.475	168.825	170.657	161.947	163.71	165.268	156.45	158.182	161.284	154.207
197.68	200.576	193.829	196.276	187.68	189.856	191.849	183.284	185.385	187.232	178.942	180.554	182.48	174.226	175.983	177.786	179.617	171.338	172.99	175.296	167.605	166.033	169.374	171.201	162.487	164.246	165.8	156.979	158.706	161.801	154.716
198.339	201.227	194.471	196.911	188.312	190.482	192.47	183.901	185.997	187.839	179.545	181.152	183.073	174.815	176.567	178.366	180.191	171.908	173.556	175.855	168.158	166.59	169.923	171.745	163.028	164.782	166.332	157.508	159.23	162.317	155.224
198.997	201.877	195.113	197.547	188.944	191.108	193.091	184.518	186.608	188.446	180.147	181.751	183.666	175.403	177.151	178.945	180.765	172.478	174.121	176.414	168.712	167.148	170.472	172.289	163.569	165.318	166.864	158.037	159.755	162.833	155.733
199.655	202.527	195.755	198.182	189.576	191.735	193.712	185.135	187.22	189.052	180.749	182.349	184.259	175.992	177.735	179.524	181.34	173.048	174.686	176.974	169.265	167.705	171.021	172.833	164.109	165.854	167.396	158.566	160.279	163.349	156.241
200.313	203.178	196.396	198.817	190.207	192.361	194.333	185.752	187.831	189.659	181.352	182.947	184.852	176.58	178.318	180.103	181.914	173.618	175.252	177.533	169.818	168.263	171.569	173.377	164.65	166.39	167.928	159.095	160.803	163.865	156.75
200.97	203.828	197.038	199.453	190.839	192.986	194.953	186.369	188.443	190.266	181.954	183.544	185.445	177.168	178.902	180.682	182.488	174.187	175.817	178.093	170.371	168.82	172.118	173.921	165.19	166.926	168.459	159.624	161.328	164.382	157.258
201.628	204.478	197.68	200.088	191.471	193.612	195.574	186.986	189.054	190.872	182.556	184.142	186.037	177.756	179.486	181.261	183.062	174.757	176.382	178.652	170.925	169.377	172.666	174.465	165.731	167.462	168.991	160.152	161.852	164.898	157.767
202.286	205.128	198.321	200.723	192.102	194.238	196.195	187.603	189.666	191.479	183.158	184.74	186.63	178.345	180.069	181.84	183.636	175.326	176.948	179.211	171.478	169.935	173.215	175.008	166.271	167.998	169.523	160.681	162.376	165.414	158.275
202.944	205.778	198.963	201.358	192.734	194.864	196.815	188.22	190.277	192.085	183.76	185.338	187.223	178.933	180.653	182.418	184.21	175.896	177.513	179.77	172.031	170.492	173.763	175.552	166.811	168.533	170.055	161.209	162.9	165.93	158.784
203.601	206.428	199.604	201.993	193.365	195.49	197.436	188.837	190.888	192.691	184.362	185.935	187.815	179.521	181.236	182.997	184.784	176.465	178.078	180.329	172.584	171.049	174.312	176.096	167.352	169.069	170.586	161.738	163.424	166.446	159.292
204.259	207.078	200.246	202.628	193.996	196.115	198.056	189.453	191.499	193.298	184.963	186.533	188.408	180.109	181.82	183.576	185.358	177.035	178.643	180.888	173.137	171.606	174.86	176.639	167.892	169.605	171.118	162.266	163.948	166.961	159.8
204.916	207.728	200.887	203.263	194.628	196.741	198.676	190.07	192.11	193.904	185.565	187.131	189	180.697	182.403	184.154	185.932	177.604	179.208	181.447	173.69	172.163	175.409	177.183	168.432	170.14	171.649	162.795	164.472	167.477	160.308
205.574	208.378	201.529	203.898	195.259	197.366	199.297	190.686	192.721	194.51	186.167	187.728	189.593	181.285	182.986	184.733	186.506	178.173	179.773	182.006	174.243	172.72	175.957	177.726	168.972	170.676	172.181	163.323	164.996	167.993	160.816
206.231	209.028	202.17	204.533	195.89	197.992	199.917	191.303	193.332	195.116	186.769	188.326	190.185	181.872	183.569	185.311	187.079	178.743	180.338	182.565	174.796	173.277	176.505	178.27	169.512	171.211	172.712	163.851	165.519	168.509	161.325
206.888	209.678	202.811	205.168	196.521	198.617	200.537	191.919	193.943	195.722	187.37	188.923	190.778	182.46	184.153	185.89	187.653	179.312	180.903	183.124	175.348	173.834	177.053	178.813	170.052	171.747	173.243	164.38	166.043	169.024	161.833
207.545	210.327	203.452	205.803	197.152	199.242	201.157	192.536	194.554	196.328	187.972	189.52	191.37	183.048	184.736	186.468	188.227	179.881	181.468	183.683	175.901	174.391	177.601	179.356	170.592	172.282	173.775	164.908	166.567	169.54	162.341
208.203	210.977	204.093	206.437	197.783	199.868	201.777	193.152	195.165	196.934	188.573	190.118	191.962	183.636	185.319	187.047	188.8	180.45	182.032	184.241	176.454	174.948	178.149	179.9	171.132	172.817	174.306	165.436	167.09	170.056	162.849
208.86	211.626	204.734	207.072	198.414	200.493	202.397	193.768	195.776	197.54	189.175	190.715	192.554	184.223	185.902	187.625	189.374	181.019	182.597	184.8	177.006	175.504	178.697	180.443	171.672	173.353	174.837	165.964	167.614	170.571	163.356
209.517	212.276	205.375	207.706	199.045	201.118	203.017	194.384	196.386	198.146	189.776	191.312	193.146	184.811	186.485	188.203	189.947	181.588	183.162	185.359	177.559	176.061	179.245	180.986	172.212	173.888	175.368	166.492	168.138	171.087	163.864
210.174	212.925	206.016	208.341	199.675	201.743	203.637	195	196.997	198.752	190.377	191.909	193.738	185.398	187.068	188.781	190.521	182.157	183.726	185.917	178.111	176.618	179.793	181.529	172.751	174.423	175.899	167.02	168.661	171.602	164.372
210.83	213.574	206.657	208.975	200.306	202.368	204.257	195.616	197.607	199.358	190.978	192.506	194.33	185.986	187.65	189.359	191.094	182.726	184.291	186.476	178.664	177.174	180.341	182.072	173.291	174.958	176.43	167.548	169.185	172.117	164.88
211.487	214.223	207.297	209.609	200.937	202.993	204.876	196.232	198.218	199.963	191.58	193.103	194.922	186.573	188.233	189.938	191.667	183.294	184.855	187.034	179.216	177.731	180.889	182.615	173.831	175.493	176.961	168.076	169.708	172.633	165.388
212.144	214.873	207.938	210.244	201.567	203.618	205.496	196.848	198.828	200.569	192.181	193.7	195.514	187.16	188.816	190.516	192.24	183.863	185.42	187.592	179.769	178.287	181.436	183.158	174.37	176.028	177.492	168.604	170.231	173.148	165.895
212.801	215.522	208.578	210.878	202.198	204.243	206.116	197.464	199.439	201.174	192.782	194.297	196.106	187.748	189.399	191.093	192.814	184.432	185.984	188.151	180.321	178.844	181.984	183.701	174.91	176.563	178.023	169.132	170.755	173.663	166.403
213.457	216.171	209.219	211.512	202.828	204.867	206.735	198.08	200.049	201.78	193.383	194.894	196.698	188.335	189.981	191.671	193.387	185	186.548	188.709	180.873	179.4	182.532	184.244	175.449	177.098	178.554	169.66	171.278	174.178	166.91
214.114	216.82	209.859	212.146	203.459	205.492	207.355	198.696	200.659	202.385	193.984	195.49	197.29	188.922	190.564	192.249	193.96	185.569	187.112	189.267	181.425	179.956	183.079	184.787	175.989	177.633	179.085	170.187	171.801	174.693	167.418
214.77	217.469	210.5	212.78	204.089	206.117	207.974	199.311	201.269	202.991	194.585	196.087	197.881	189.509	191.146	192.827	194.533	186.137	187.677	189.825	181.978	180.512	183.627	185.33	176.528	178.168	179.616	170.715	172.324	175.209	167.925
215.427	218.117	211.14	213.414	204.719	206.741	208.593	199.927	201.879	203.596	195.185	196.684	198.473	190.096	191.729	193.405	195.106	186.706	188.241	190.383	182.53	181.069	184.174	185.872	177.068	178.702	180.146	171.243	172.847	175.724	168.433
216.083	218.766	211.78	214.048	205.349	207.366	209.213	200.542	202.489	204.201	195.786	197.28	199.064	190.683	192.311	193.982	195.679	187.274	188.805	190.942	183.082	181.625	184.722	186.415	177.607	179.237	180.677	171.77	173.37	176.239	168.94
216.739	219.415	212.421	214.682	205.98	207.99	209.832	201.158	203.099	204.806	196.387	197.877	199.656	191.27	192.893	194.56	196.251	187.842	189.369	191.5	183.634	182.181	185.269	186.957	178.146	179.772	181.208	172.298	173.893	176.753	169.448
217.395	220.063	213.061	215.315	206.61	208.615	210.451	201.773	203.709	205.411	196.988	198.473	200.247	191.857	193.476	195.138	196.824	188.411	189.933	192.057	184.186	182.737	185.816	187.5	178.685	180.306	181.738	172.825	174.416	177.268	169.955
218.052	220.712	213.701	215.949	207.24	209.239	211.07	202.389	204.319	206.016	197.588	199.069	200.838	192.443	194.058	195.715	197.397	188.979	190.497	192.615	184.737	183.293	186.364	188.042	179.224	180.841	182.269	173.353	174.939	177.783	170.462
218.708	221.361	214.341	216.583	207.87	209.863	211.689	203.004	204.929	206.621	198.189	199.666	201.43	193.03	194.64	196.292	197.97	189.547	191.061	193.173	185.289	183.849	186.911	188.585	179.763	181.375	182.799	173.88	175.462	178.298	170.969
219.364	222.009	214.981	217.216	208.499	210.487	212.308	203.619	205.539	207.226	198.789	200.262	202.021	193.617	195.222	196.87	198.542	190.115	191.624	193.731	185.841	184.405	187.458	189.127	180.302	181.91	183.329	174.407	175.985	178.813	171.476
220.019	222.657	215.621	217.85	209.129	211.112	212.927	204.234	206.149	207.831	199.39	200.858	202.612	194.203	195.804	197.447	199.115	190.683	192.188	194.289	186.393	184.96	188.005	189.67	180.841	182.444	183.86	174.935	176.508	179.327	171.984
220.675	223.306	216.26	218.483	209.759	211.736	213.546	204.85	206.758	208.436	199.99	201.454	203.203	194.79	196.386	198.024	199.687	191.251	192.752	194.846	186.944	185.516	188.552	190.212	181.38	182.978	184.39	175.462	177.03	179.842	172.491
221.331	223.954	216.9	219.116	210.389	212.36	214.165	205.465	207.368	209.041	200.59	202.05	203.794	195.377	196.968	198.602	200.26	191.819	193.315	195.404	187.496	186.072	189.099	190.754	181.919	183.513	184.92	175.989	177.553	180.357	172.998
221.987	224.602	217.54	219.75	211.018	212.984	214.784	206.08	207.977	209.645	201.19	202.646	204.385	195.963	197.55	199.179	200.832	192.387	193.879	195.962	188.047	186.628	189.646	191.296	182.458	184.047	185.45	176.516	178.076	180.871	173.505
222.643	225.25	218.179	220.383	211.648	213.607	215.402	206.694	208.587	210.25	201.791	203.242	204.976	196.549	198.132	199.756	201.404	192.955	194.442	196.519	188.599	187.183	190.193	191.838	182.997	184.581	185.981	177.043	178.598	181.386	174.011
223.298	225.898	218.819	221.016	212.277	214.231	216.021	207.309	209.196	210.855	202.391	203.838	205.567	197.136	198.713	200.333	201.977	193.523	195.006	197.077	189.15	187.739	190.74	192.38	183.535	185.115	186.511	177.57	179.121	181.9	174.518
[truncated: 1,023 more rows]

## Sheet:  50K Shift
13.523	18.242	10.683	13.574	17.271	10.435	14.051	17.376	10.015	13.456	16.341	9.343	12.68	10.206	13.636	11.91	14.104	11.756	12.783	9.906	16.117	13.916	16.619	14.19	16.815	15.035	12.039	14.742	16.141
[truncated: 1,339 more rows]

[truncated: 24 more sheets: 75K Shift, 100K Shift, 150K Shift, 200K Shift, 250K Shift, 295K Shift, 4K Intensity, 25K Intensity, 50K Intensity, 75K Intensity, 100K Intensity, 150K Intensity, 200K Intensity, 250K Intensity, 295K Intensity, 4K WL, 25K WL, 50K WL, 75K WL, 100K WL …]
